# Supplementary material
Source: PubMed Central journal article supplement (PMC5084882)
Supplement: ASN.2015070827SupplementaryData.pdf [file ASN.2015070827SupplementaryData.pdf]

**Supplementary Table 1. Gene sets from Figure 6.** Lists of genes from each individual gene set defined in Figure 6, including the fold-change in expression of each gene in treatment group pair-wise comparisons. ENSEMBL: Ensembl gene identifier; Symbol: official gene symbol; logFC: log fold change; p value: significance of fold-change in a pair-wise comparison,  $P < 0.05$  cut-off; FDR: false discovery rate, expected proportion of false positives among the differentially expressed genes in a pair-wise comparison (FDR < 0.25 cut-off).

Sup. Table 1 SET 1

| ENSEMBL            | Symbol       | CP versus Sal |        |      | CP versus CP+DCA |        |      | DCA versus Sal |        |      |                                                                                                                  |
|--------------------|--------------|---------------|--------|------|------------------|--------|------|----------------|--------|------|------------------------------------------------------------------------------------------------------------------|
|                    |              | logFC         | Pvalue | FDR  | logFC            | Pvalue | FDR  | logFC          | Pvalue | FDR  |                                                                                                                  |
| ENSMUSG0000020326  | Ccng1        | 2.64          | 0.00   | 0.00 | -0.06            | 0.13   | 0.96 | 0.40           | 0.00   | 0.23 | cyg11 [Source:MGJ Symbol:Acc:MGJ:102890]                                                                         |
| ENSMUSG0000021898  | Ca2          | 3.97          | 0.00   | 0.00 | -0.24            | 0.02   | 0.25 | 0.01           | 1.00   | 1.00 | cathepsin 2E [Source:MGJ Symbol:Acc:MGJ:2443470]                                                                 |
| ENSMUSG0000041959  | S100a10      | 2.31          | 0.00   | 0.00 | -0.21            | 0.02   | 0.23 | -0.11          | 0.53   | 1.00 | S100 calcium binding protein A10 (calpactin) [Source:MGJ Symbol:Acc:MGJ:1339468]                                 |
| ENSMUSG0000092341  | Malat1       | 1.09          | 0.00   | 0.00 | -0.11            | 0.20   | 1.00 | 0.66           | 0.00   | 0.00 | metastasis associated lung adenocarcinoma transcript 1 (non-coding RNA) [Source:MGJ Symbol:Acc:MGJ:1919593]      |
| ENSMUSG0000072949  | Acca1        | 1.73          | 0.00   | 0.00 | -0.22            | 0.01   | 0.12 | -0.44          | 0.01   | 1.00 | acyl-CoA thioesterase 1 [Source:MGJ Symbol:Acc:MGJ:1343936]                                                      |
| ENSMUSG0000064339  | mt-Rnr2      | 1.09          | 0.00   | 0.00 | -0.08            | 0.17   | 1.00 | 0.67           | 0.00   | 0.00 | mitochondrially encoded 16S rRNA [Source:MGJ Symbol:Acc:MGJ:102492]                                              |
| ENSMUSG0000022594  | Rh3          | 1.86          | 0.00   | 0.00 | -0.28            | 0.01   | 0.13 | -0.37          | 0.03   | 1.00 | glutathione S-transferase, alpha 3 [Source:MGJ Symbol:Acc:MGJ:95686]                                             |
| ENSMUSG0000038733  | Zma3         | 2.11          | 0.00   | 0.00 | -0.32            | 0.01   | 0.11 | -0.03          | 0.93   | 1.00 | BCL2-associated X protein [Source:MGJ Symbol:Acc:MGJ:99702]                                                      |
| ENSMUSG0000027863  | Zma33        | 2.27          | 0.00   | 0.00 | -0.25            | 0.05   | 0.48 | 0.23           | 0.46   | 1.00 | zinc finger matrix type 3 [Source:MGJ Symbol:Acc:MGJ:1195270]                                                    |
| ENSMUSG0000033634  | Cmi2         | 1.78          | 0.00   | 0.00 | -0.02            | 0.85   | 1.00 | -0.32          | 0.13   | 1.00 | camelid-like 2 [Source:MGJ Symbol:Acc:MGJ:2136446]                                                               |
| ENSMUSG0000026762  | E2f4         | 1.21          | 0.00   | 0.00 | -0.21            | 0.02   | 0.25 | 0.12           | 0.38   | 1.00 | epoxide inducible 2 mRNA [Source:MGJ Symbol:Acc:MGJ:108090]                                                      |
| ENSMUSG0000036678  | Asaa         | 2.48          | 0.00   | 0.00 | -0.23            | 0.11   | 0.86 | -0.06          | 0.91   | 1.00 | achalasia, adrenocortical insufficiency, alacrima [Source:MGJ Symbol:Acc:MGJ:2443767]                            |
| ENSMUSG0000064337  | mt-Rnr1      | 1.30          | 0.00   | 0.00 | -0.15            | 0.03   | 0.33 | 0.61           | 0.00   | 0.56 | mitochondrially encoded 12S rRNA [Source:MGJ Symbol:Acc:MGJ:102493]                                              |
| ENSMUSG0000021226  | Acca2        | 1.67          | 0.00   | 0.00 | -0.32            | 0.00   | 0.05 | -0.26          | 0.22   | 1.00 | acyl-CoA thioesterase 2 [Source:MGJ Symbol:Acc:MGJ:2159605]                                                      |
| ENSMUSG0000038776  | EphrA1       | 1.88          | 0.00   | 0.00 | -0.04            | 0.78   | 1.00 | -0.10          | 0.70   | 1.00 | epoxide hydrolase 1, microsomal [Source:MGJ Symbol:Acc:MGJ:95405]                                                |
| ENSMUSG0000024769  | Cdk42bpa     | 1.26          | 0.00   | 0.00 | -0.18            | 0.04   | 0.46 | 0.03           | 0.83   | 1.00 | CDC42 binding protein kinase 4 cytosolic 1 [Source:MGJ Symbol:Acc:MGJ:2652845]                                   |
| ENSMUSG0000040918  | Slc19a2      | 2.23          | 0.00   | 0.00 | -0.43            | 0.00   | 0.08 | 0.14           | 0.68   | 1.00 | solute carrier family 19 (thiamine transporter), member 2 [Source:MGJ Symbol:Acc:MGJ:1928761]                    |
| ENSMUSG0000032060  | Cybb         | 1.69          | 0.00   | 0.00 | 0.10             | 0.47   | 1.00 | 0.18           | 0.36   | 1.00 | crystallin, alpha B [Source:MGJ Symbol:Acc:MGJ:88516]                                                            |
| ENSMUSG0000007891  | Csd1         | 0.73          | 0.00   | 0.00 | -0.14            | 0.01   | 0.20 | -0.06          | 0.45   | 1.00 | cathelain D [Source:MGJ Symbol:Acc:MGJ:88562]                                                                    |
| ENSMUSG0000033534  | Ddr1         | 1.09          | 0.00   | 0.00 | -0.24            | 0.00   | 0.08 | -0.07          | 0.61   | 1.00 | FAT tumor suppressor homolog 1 [Drosophila] [Source:MGJ Symbol:Acc:MGJ:109168]                                   |
| ENSMUSG0000048468  | 6530418L21Rk | 5.34          | 0.00   | 0.00 | -0.47            | 0.04   | 0.43 | 0.01           | 0.61   | 1.00 | disoidin domain receptor family, member 1 [Source:MGJ Symbol:Acc:MGJ:98216]                                      |
| ENSMUSG0000033865  | Ucp2         | 1.36          | 0.00   | 0.00 | 0.00             | 1.00   | 1.00 | 0.17           | 1.00   | 1.00 | RIKEN cDNA 6530418L21 gene [Source:MGJ Symbol:Acc:MGJ:1923497]                                                   |
| ENSMUSG0000007659  | Bcl2l1       | 1.11          | 0.00   | 0.00 | -0.09            | 0.33   | 1.00 | -0.01          | 0.33   | 1.00 | uncoupling protein 2 (mitochondrial, proton carrier) [Source:MGJ Symbol:Acc:MGJ:109354]                          |
| ENSMUSG0000000817  | Egr3         | 1.76          | 0.00   | 0.00 | -0.32            | 0.02   | 0.27 | -0.04          | 0.97   | 1.00 | BCL2-like 1 [Source:MGJ Symbol:Acc:MGJ:88199]                                                                    |
| ENSMUSG0000040997  | Abhd4        | 1.21          | 0.00   | 0.00 | -0.24            | 0.02   | 0.26 | -0.07          | 1.00   | 1.00 | F- and WD-40 domain protein 9 [Source:MGJ Symbol:Acc:MGJ:1915878]                                                |
| ENSMUSG0000069520  | Tmem19       | 0.97          | 0.00   | 0.00 | 0.07             | 0.42   | 1.00 | -0.15          | 0.28   | 1.00 | transmembrane protein 19 [Source:MGJ Symbol:Acc:MGJ:1914476]                                                     |
| ENSMUSG0000034457  | Eda2r        | 5.41          | 0.00   | 0.00 | -0.59            | 0.03   | 0.38 | 0.11           | 1.00   | 1.00 | ectodysplasin A2 receptor [Source:MGJ Symbol:Acc:MGJ:2442860]                                                    |
| ENSMUSG0000038761  | Rps27        | 1.05          | 0.00   | 0.00 | -0.02            | 0.81   | 1.00 | -0.15          | 0.30   | 1.00 | ribosomal protein S27-like [Source:MGJ Symbol:Acc:MGJ:1915119]                                                   |
| ENSMUSG0000032379  | Aldh1a1      | 2.72          | 0.00   | 0.00 | -0.23            | 0.20   | 1.00 | -0.50          | 0.41   | 1.00 | aldehyde dehydrogenase family 1, subfamily A1 [Source:MGJ Symbol:Acc:MGJ:1353450]                                |
| ENSMUSG0000021996  | Esd          | 0.67          | 0.00   | 0.00 | -0.11            | 0.06   | 0.56 | 0.07           | 0.46   | 1.00 | esterase Diformylglutathione hydrolase [Source:MGJ Symbol:Acc:MGJ:95421]                                         |
| ENSMUSG0000057738  | Spsa2        | 0.69          | 0.00   | 0.00 | -0.10            | 0.08   | 0.73 | 0.06           | 0.55   | 1.00 | spectrin alpha 2 [Source:MGJ Symbol:Acc:MGJ:98386]                                                               |
| ENSMUSG0000048612  | Myf6         | 1.81          | 0.00   | 0.00 | -0.48            | 0.00   | 0.05 | -0.10          | 0.84   | 1.00 | myofibrin [Source:MGJ Symbol:Acc:MGJ:1919122]                                                                    |
| ENSMUSG0000026262  | Glip2        | 0.97          | 0.00   | 0.00 | -0.11            | 0.16   | 1.00 | -0.24          | 0.10   | 1.00 | ferritin light chain 2 [Source:MGJ Symbol:Acc:MGJ:95550]                                                         |
| ENSMUSG0000031088  | Glx3         | 1.13          | 0.00   | 0.00 | -0.04            | 0.70   | 1.00 | 0.14           | 0.42   | 1.00 | glutaredoxin 3 [Source:MGJ Symbol:Acc:MGJ:1353653]                                                               |
| ENSMUSG0000067274  | Rplp0        | 0.66          | 0.00   | 0.00 | -0.16            | 0.01   | 0.11 | 0.02           | 0.84   | 1.00 | ribosomal protein, large, P0 [Source:MGJ Symbol:Acc:MGJ:1927636]                                                 |
| ENSMUSG0000069083  | Gsp1         | 0.98          | 0.00   | 0.00 | -0.13            | 0.16   | 1.00 | -0.06          | 0.67   | 1.00 | glutathione S-transferase, pi 1 [Source:MGJ Symbol:Acc:MGJ:95865]                                                |
| ENSMUSG0000017047  | Farf2        | 1.30          | 0.00   | 0.00 | -0.31            | 0.01   | 0.00 | -0.05          | 0.91   | 1.00 | transcription factor, erythroid 2, like 2 [Source:MGJ Symbol:Acc:MGJ:108420]                                     |
| ENSMUSG0000029700  | Slc13a1      | 0.97          | 0.00   | 0.00 | 0.69             | 0.00   | 0.00 | -0.02          | 0.86   | 1.00 | solute carrier family 13 (sodium/sulfate symporter), member 1 [Source:MGJ Symbol:Acc:MGJ:859937]                 |
| ENSMUSG0000003026  | Comt         | 0.91          | 0.00   | 0.00 | 0.00             | 0.99   | 1.00 | -0.11          | 0.44   | 1.00 | catechol O-methyltransferase [Source:MGJ Symbol:Acc:MGJ:88470]                                                   |
| ENSMUSG0000068744  | Parg1        | 5.35          | 0.00   | 0.00 | -0.77            | 0.01   | 0.17 | 0.00           | 1.00   | 1.00 | proline/serine-rich coiled-coil 1 [Source:MGJ Symbol:Acc:MGJ:1913099]                                            |
| ENSMUSG0000047886  | Palm3        | 1.73          | 0.00   | 0.00 | -0.20            | 0.23   | 1.00 | -0.36          | 0.34   | 1.00 | paralemnin 3 [Source:MGJ Symbol:Acc:MGJ:1925197]                                                                 |
| ENSMUSG0000000916  | Gm10116      | 0.97          | 0.00   | 0.00 | -0.11            | 0.14   | 1.00 | -0.23          | 0.84   | 1.00 | predicted gene 10116 [Source:MGJ Symbol:Acc:MGJ:3779109]                                                         |
| ENSMUSG0000027907  | S100a11      | 1.02          | 0.00   | 0.00 | -0.16            | 0.10   | 0.83 | 0.04           | 0.84   | 1.00 | S100 calcium binding protein A11 (calgizzarin) [Source:MGJ Symbol:Acc:MGJ:1338798]                               |
| ENSMUSG0000030641  | 463234111Rk  | 4.88          | 0.00   | 0.00 | -0.61            | 0.04   | 0.42 | 0.07           | 1.00   | 1.00 | RIKEN cDNA 463234111 gene [Source:MGJ Symbol:Acc:MGJ:1921291]                                                    |
| ENSMUSG0000000562  | Zfp385a      | 2.99          | 0.00   | 0.00 | -0.51            | 0.03   | 0.39 | 0.13           | 1.00   | 1.00 | zinc finger protein 385a [Source:MGJ Symbol:Acc:MGJ:1352465]                                                     |
| ENSMUSG0000000395  | Rb73b        | 1.03          | 0.00   | 0.00 | -0.08            | 0.09   | 0.78 | -0.04          | 0.98   | 1.00 | ribosomal protein S4 [Source:MGJ Symbol:Acc:MGJ:83581]                                                           |
| ENSMUSG0000056542  | Gm15500      | 0.95          | 0.00   | 0.00 | -0.12            | 0.19   | 1.00 | -0.26          | 0.09   | 1.00 | predicted gene 15500 [Source:MGJ Symbol:Acc:MGJ:3831433]                                                         |
| ENSMUSG0000029221  | Slc30a9      | 0.72          | 0.00   | 0.00 | 0.12             | 0.16   | 1.00 | 0.15           | 0.18   | 1.00 | solute carrier family 30 (zinc transporter), member 9 [Source:MGJ Symbol:Acc:MGJ:1923690]                        |
| ENSMUSG0000058135  | Gstm1        | 0.60          | 0.00   | 0.00 | -0.17            | 0.01   | 0.15 | 0.02           | 0.88   | 1.00 | glutathione S-transferase, mu 1 [Source:MGJ Symbol:Acc:MGJ:95860]                                                |
| ENSMUSG0000050708  | Fhl1         | 0.96          | 0.00   | 0.00 | -0.11            | 0.10   | 0.82 | -0.22          | 0.09   | 1.00 | ferritin light chain 1 [Source:MGJ Symbol:Acc:MGJ:95589]                                                         |
| ENSMUSG0000042924  | Farf1        | 2.17          | 0.00   | 0.00 | -0.31            | 0.01   | 0.14 | -0.37          | 0.94   | 1.00 | N-ethylmaleimide sensitive factor 1 [Source:MGJ Symbol:Acc:MGJ:1923141]                                          |
| ENSMUSG0000024747  | Aldh1a7      | 2.49          | 0.00   | 0.00 | 0.45             | 0.01   | 0.18 | 0.01           | 1.00   | 1.00 | aldehyde dehydrogenase family 1, subfamily A7 [Source:MGJ Symbol:Acc:MGJ:1347050]                                |
| ENSMUSG0000038155  | Gsp2         | 1.01          | 0.00   | 0.00 | -0.12            | 0.25   | 1.00 | -0.08          | 0.68   | 1.00 | glutathione S-transferase, pi 2 [Source:MGJ Symbol:Acc:MGJ:95864]                                                |
| ENSMUSG0000058216  | BC021614     | 5.39          | 0.00   | 0.00 | -0.72            | 0.04   | 0.40 | -0.03          | 1.00   | 1.00 | cDNA sequence BC021614 [Source:MGJ Symbol:Acc:MGJ:2380578]                                                       |
| ENSMUSG0000000588  | Ucp1         | 1.23          | 0.00   | 0.00 | -0.58            | 0.01   | 0.72 | -0.04          | 0.93   | 1.00 | uncoupling protein 1 [Source:MGJ Symbol:Acc:MGJ:98242]                                                           |
| ENSMUSG0000026956  | Uplg11       | 0.92          | 0.00   | 0.00 | 0.00             | 0.98   | 1.00 | -0.30          | 0.06   | 1.00 | UDP-N-ethylglucosamine pyrophosphorylase-like 1 [Source:MGJ Symbol:Acc:MGJ:2443318]                              |
| ENSMUSG0000095159  | TUBB5        | 1.14          | 0.00   | 0.00 | -0.28            | 0.03   | 0.33 | -0.15          | 0.50   | 1.00 | Uncharacterized protein [Source:UniProtKB/TrEMBL:Acc:J3QNR5]                                                     |
| ENSMUSG0000044313  | Mab213       | 3.54          | 0.00   | 0.00 | -0.42            | 0.14   | 0.99 | -0.08          | 1.00   | 1.00 | mal-21-like 3 (C. elegans) [Source:MGJ Symbol:Acc:MGJ:2446273]                                                   |
| ENSMUSG0000033039  | Mical1       | 1.08          | 0.00   | 0.00 | -0.34            | 0.00   | 0.09 | -0.01          | 1.00   | 1.00 | microtubule associated monoglycane, capronin and LIM domain containing-like 1 [Source:MGJ Symbol:Acc:MGJ:105870] |
| ENSMUSG0000000173  | Fat2         | 1.68          | 0.00   | 0.00 | -0.02            | 0.91   | 1.00 | -0.04          | 0.91   | 1.00 | metallothionein 2 [Source:MGJ Symbol:Acc:MGJ:97172]                                                              |
| ENSMUSG0000076036  | AC151602.1   | 0.92          | 0.00   | 0.00 | -0.08            | 0.24   | 1.00 | -0.20          | 0.17   | 1.00 | 0.17 1.00 0                                                                                                      |
| ENSMUSG0000032786  | Alas1        | 0.89          | 0.00   | 0.00 | -0.23            | 0.02   | 0.30 | 0.11           | 0.55   | 1.00 | aminolevulinic acid synthase 1 [Source:MGJ Symbol:Acc:MGJ:87989]                                                 |
| ENSMUSG0000021466  | Pfp2         | 1.69          | 0.00   | 0.00 | 0.29             | 0.08   | 0.72 | -0.20          | 0.64   | 1.00 | fructose biphosphatase 2 [Source:MGJ Symbol:Acc:MGJ:95491]                                                       |
| ENSMUSG0000000893  | Gm373b       | 0.63          | 0.00   | 0.00 | -0.18            | 0.01   | 0.16 | -0.01          | 0.62   | 1.00 | predicted gene 373b [Source:MGJ Symbol:Acc:MGJ:3644565]                                                          |
| ENSMUSG0000041936  | Agrn         | 0.64          | 0.00   | 0.00 | -0.20            | 0.00   | 0.08 | -0.15          | 0.20   | 1.00 | agrin [Source:MGJ Symbol:Acc:MGJ:87961]                                                                          |
| ENSMUSG0000017404  | Rpl19        | 0.59          | 0.00   | 0.00 | -0.04            | 0.54   | 1.00 | 0.04           | 0.70   | 1.00 | ribosomal protein L19 [Source:MGJ Symbol:Acc:MGJ:98020]                                                          |
| ENSMUSG0000035443  | Thy1         | 1.53          | 0.00   | 0.00 | -0.33            | 0.06   | 0.58 | -0.02          | 1.00   | 1.00 | thymocyte nuclear protein 1 [Source:MGJ Symbol:Acc:MGJ:1925112]                                                  |
| ENSMUSG0000046819  | Ddnl4        | 1.85          | 0.00   | 0.00 | -0.54            | 0.01   | 0.13 | -0.08          | 0.89   | 1.00 | DNA-damage-inducible transcript 4-like [Source:MGJ Symbol:Acc:MGJ:1920534]                                       |
| ENSMUSG0000000812  | CCND3        | 1.29          | 0.00   | 0.00 | -0.32            | 0.20   | 1.00 | -0.23          | 0.74   | 1.00 | cyclin D3 [Source:MGJ Symbol:Acc:MGJ:8411838]                                                                    |
| ENSMUSG0000062191  | Plim1        | 2.38          | 0.00   | 0.00 | -0.65            | 0.01   | 0.16 | 0.24           | 0.86   | 1.00 | filamin binding LIM protein 1 [Source:MGJ Symbol:Acc:MGJ:1921452]                                                |
| ENSMUSG0000037573  | Tob1         | 0.84          | 0.00   | 0.00 | -0.20            | 0.05   | 0.49 | 0.19           | 0.19   | 1.00 | transducer of ErbB-2-1 [Source:MGJ Symbol:Acc:MGJ:1349721]                                                       |
| ENSMUSG0000041733  | Enc1         | 2.35          | 0.00   | 0.00 | -0.72            | 0.00   | 0.07 | -0.31          | 0.85   | 1.00 | ectodermal-neural crest 1 [Source:MGJ Symbol:Acc:MGJ:1096110]                                                    |
| ENSMUSG0000020373  | Crbp21       | 0.52          | 0.00   | 0.00 | -0.15            | 0.01   | 0.15 | -0.02          | 0.88   | 1.00 | quanine nucleotide binding protein (G protein), beta polypeptide 2 like 1 [Source:MGJ Symbol:Acc:MGJ:101849]     |
| ENSMUSG0000097204  | CCND3O94.1   | 1.05          | 0.00   | 0.00 | -0.38            | 0.00   | 0.08 | -0.07          | 0.80   | 1.00 | 0.80 1.00 0                                                                                                      |
| ENSMUSG0000015714  | Lass2        | 0.62          | 0.00   | 0.00 | -0.22            | 0.00   | 0.07 | 0.06           | 0.59   | 1.00 | LAG1 homolog, ceramide synthase 2 [Source:MGJ Symbol:Acc:MGJ:1924143]                                            |
| ENSMUSG0000031827  | Cott1        | 0.78          | 0.00   | 0.00 | 0.17             | 0.06   | 0.58 | 0.07           | 0.62   | 1.00 | coactosin-like 1 (Dictyostelium) [Source:MGJ Symbol:Acc:MGJ:1919222]                                             |
| ENSMUSG0000066072  | Cyp41a10     | 1.29          | 0.00   | 0.00 | -0.18            | 0.25   | 1.00 | -0.30          | 0.02   | 1.00 | cytochrome P450, family 4, subfamily A, polypeptide 10 [Source:MGJ Symbol:Acc:MGJ:88611]                         |
| ENSMUSG0000030918  | Cmi2         | 1.01          | 0.00   | 0.00 | -0.62            | 0.00   | 0.06 | -0.21          | 0.72   | 1.00 | hydroxymethylglutaryl-CoA lyase 2 [Source:MGJ Symbol:Acc:MGJ:95418]                                              |
| ENSMUSG0000024048  | Mf12a        | 0.77          | 0.00   | 0.00 | -0.26            | 0.01   | 0.10 | 0.07           | 0.68   | 1.00 | myosin, light chain 12A, regulator, non-sarcomeric [Source:MGJ Symbol:Acc:MGJ:1914518]                           |
| ENSMUSG00000331479 | Vps36        | 1.06          | 0.00   | 0.00 | -0.11            | 0.40   | 1.00 | 0.15           | 0.44   | 1.00 | vacuolar protein sorting 36 (yeast) [Source:MGJ Symbol:Acc:MGJ:1917410]                                          |
| ENSMUSG0000027423  | Srs5         | 0.73          | 0.00   | 0.00 | -0.21            | 0.02   | 0.29 | 0.02           | 0.91   | 1.00 | sorting nexin 5 [Source:MGJ Symbol:Acc:MGJ:1916428]                                                              |
| ENSMUSG0000041989  | Gm4          | 1.71          | 0.00   | 0.00 | -0.62            | 0.00   | 0.06 | -0.21          | 0.72   | 1.00 | homolog gene family, member D [Source:MGJ Symbol:Acc:MGJ:108446]                                                 |
| ENSMUSG0000029470  | P2wa         | 1.08          | 0.00   | 0.00 | -0.35            | 0.01   | 0.15 | -0.10          | 0.68   | 1.00 | putative receptor P2X, ligand-gated ion channel 4 [Source:MGJ Symbol:Acc:MGJ:1338859]                            |
| ENSMUSG            |              |               |        |      |                  |        |      |                |        |      |                                                                                                                  |

|                     |              |      |      |      |       |      |      |       |      |      |                                                                                                  |
|---------------------|--------------|------|------|------|-------|------|------|-------|------|------|--------------------------------------------------------------------------------------------------|
| ENSMUSG00000022003  | Slc25a30     | 0.94 | 0.00 | 0.00 | -0.06 | 0.74 | 1.00 | -0.07 | 0.83 | 1.00 | solute carrier family 25, member 30 [Source:MGI Symbol:Acc:MGI:1914804]                          |
| ENSMUSG0000001416   | Ccd3         | 0.61 | 0.00 | 0.00 | -0.26 | 0.11 | 0.11 | 0.07  | 0.63 | 1.00 | chaperonin containing Top1, subunit 3 (gamma) [Source:MGI Symbol:Acc:MGI:104708]                 |
| ENSMUSG0000003573   | Grp94        | 1.26 | 0.00 | 0.00 | -0.42 | 0.03 | 0.36 | 0.03  | 0.90 | 1.00 | homer homolog 3 (Drosophila) [Source:MGI Symbol:Acc:MGI:1347259]                                 |
| ENSMUSG00000038495  | Oud7b        | 0.81 | 0.00 | 0.00 | -0.38 | 0.00 | 0.06 | 0.09  | 0.67 | 1.00 | OTU domain containing TB1 [Source:MGI Symbol:Acc:MGI:2654703]                                    |
| ENSMUSG00000012405  | Rpl15        | 0.49 | 0.00 | 0.00 | -0.05 | 0.47 | 1.00 | 0.08  | 0.48 | 1.00 | ribosomal protein L15 [Source:MGI Symbol:Acc:MGI:1913730]                                        |
| ENSMUSG00000022247  | Bnx1         | 1.06 | 0.00 | 0.00 | -0.36 | 0.04 | 0.40 | 0.08  | 0.80 | 1.00 | BRX1, biogenesis of ribosomes, homolog (S. cerevisiae) [Source:MGI Symbol:Acc:MGI:1915082]       |
| ENSMUSG00000036936  | Plnm2        | 0.42 | 0.00 | 0.00 | 0.00  | 0.98 | 1.00 | -0.01 | 0.95 | 1.00 | plein 82 [Source:MGI Symbol:Acc:MGI:2154259]                                                     |
| ENSMUSG00000032845  | Gm6459       | 0.82 | 0.00 | 0.00 | -0.30 | 0.00 | 0.07 | -0.20 | 0.16 | 0.00 | predominant gene 20459 [Source:MGI Symbol:Acc:MGI:1514924]                                       |
| ENSMUSG00000028542  | Slc6a9       | 1.19 | 0.00 | 0.00 | 0.02  | 0.95 | 1.00 | -0.09 | 0.48 | 1.00 | kinase (PRK4) anchor protein 2 [Source:MGI Symbol:Acc:MGI:1306795]                               |
| ENSMUSG00000031652  | M4bp1        | 0.95 | 0.00 | 0.00 | -0.26 | 0.10 | 0.79 | 0.02  | 1.00 | 1.00 | NEDD4 binding protein 1 [Source:MGI Symbol:Acc:MGI:2136825]                                      |
| ENSMUSG00000021178  | Pfam1        | 0.63 | 0.00 | 0.00 | -0.28 | 0.01 | 0.10 | 0.09  | 0.53 | 1.00 | protease (prosome, macropan) 26S subunit, ATPase 1 [Source:MGI Symbol:Acc:MGI:106054]            |
| ENSMUSG00000030945  | Gm6459       | 0.82 | 0.00 | 0.00 | -0.30 | 0.00 | 0.07 | -0.20 | 0.16 | 0.00 | predominant gene 20459 [Source:MGI Symbol:Acc:MGI:1514924]                                       |
| ENSMUSG00000025511  | Tgpa4        | 0.90 | 0.00 | 0.00 | -0.32 | 0.02 | 0.31 | 0.15  | 0.48 | 1.00 | tetrapsin 4 [Source:MGI Symbol:Acc:MGI:1928077]                                                  |
| ENSMUSG00000061167  | Rpl15-ps3    | 0.58 | 0.00 | 0.00 | -0.07 | 0.44 | 1.00 | 0.07  | 0.59 | 1.00 | ribosomal protein L15, pseudogene 3 [Source:MGI Symbol:Acc:MGI:3782952]                          |
| ENSMUSG00000060032  | H2afj        | 0.80 | 0.00 | 0.00 | -0.29 | 0.02 | 0.29 | 0.06  | 0.79 | 1.00 | H2A histone family, member J [Source:MGI Symbol:Acc:MGI:3606192]                                 |
| ENSMUSG000000091477 | Gm5799       | 3.15 | 0.00 | 0.00 | -1.04 | 0.01 | 0.15 | 0.14  | 1.00 | 1.00 | predicted gene 5799 [Source:MGI Symbol:Acc:MGI:3646715]                                          |
| ENSMUSG00000000793  | Cpfl1        | 2.92 | 0.00 | 0.00 | -0.77 | 0.04 | 0.40 | -0.17 | 1.00 | 1.00 | carboxy-terminal tailless 1c [Source:MGI Symbol:Acc:MGI:2446526]                                 |
| ENSMUSG00000017615  | Traf1ap1     | 0.82 | 0.00 | 0.00 | -0.30 | 0.02 | 0.31 | 0.02  | 0.95 | 1.00 | tumor necrosis factor, alpha-induced protein 1 (endothelial) [Source:MGI Symbol:Acc:MGI:104961]  |
| ENSMUSG000000071657 | Bscl2        | 0.86 | 0.00 | 0.00 | -0.03 | 0.83 | 1.00 | -0.08 | 0.75 | 1.00 | Bernardini-Seip congenital lipodystrophy 2 homolog (human) [Source:MGI Symbol:Acc:MGI:1298392]   |
| ENSMUSG00000028788  | Pdgfra       | 0.60 | 0.00 | 0.00 | -0.26 | 0.11 | 0.11 | 0.03  | 0.86 | 1.00 | protein tyrosine phosphatase 4a2 [Source:MGI Symbol:Acc:MGI:1277117]                             |
| ENSMUSG0000003332   | Hsp26        | 0.75 | 0.00 | 0.00 | -0.36 | 0.00 | 0.07 | 0.02  | 0.92 | 1.00 | B cell transition gene 1, anti-proliferative [Source:MGI Symbol:Acc:MGI:38215]                   |
| ENSMUSG00000033446  | Hsp6         | 1.22 | 0.00 | 0.00 | -0.53 | 0.01 | 0.12 | 0.11  | 0.77 | 1.00 | lysophosphatidic acid receptor 6 [Source:MGI Symbol:Acc:MGI:1914418]                             |
| ENSMUSG00000066687  | Zbtb16       | 2.60 | 0.00 | 0.00 | 0.61  | 0.03 | 0.38 | -0.15 | 1.00 | 1.00 | zinc finger and BTB domain containing 16 [Source:MGI Symbol:Acc:MGI:103222]                      |
| ENSMUSG000000078377 | Gm4294       | 0.59 | 0.00 | 0.00 | -0.07 | 0.42 | 1.00 | 0.07  | 0.58 | 1.00 | predicted gene 4294 [Source:MGI Symbol:Acc:MGI:3782472]                                          |
| ENSMUSG000000085587 | Gm14493      | 1.62 | 0.00 | 0.00 | -0.59 | 0.02 | 0.25 | -0.07 | 1.00 | 1.00 | predicted gene 14493 [Source:MGI Symbol:Acc:MGI:370531]                                          |
| ENSMUSG00000000251  | Gm4294       | 0.59 | 0.00 | 0.00 | -0.07 | 0.42 | 1.00 | 0.07  | 0.58 | 1.00 | predicted gene 4294 [Source:MGI Symbol:Acc:MGI:3782472]                                          |
| ENSMUSG000000028051 | Hox3         | 1.71 | 0.00 | 0.00 | -0.62 | 0.02 | 0.28 | 0.10  | 1.00 | 1.00 | receptor accessory protein 6 [Source:MGI Symbol:Acc:MGI:1926483]                                 |
| ENSMUSG00000030695  | Aldoa        | 0.34 | 0.00 | 0.00 | 0.00  | 0.95 | 1.00 | -0.11 | 0.17 | 1.00 | hyperpolarization-activated, cyclic nucleotide-gated K+ 3 [Source:MGI Symbol:Acc:MGI:1298211]    |
| ENSMUSG00000026968  | Dpp7         | 0.74 | 0.00 | 0.00 | -0.21 | 0.08 | 0.68 | -0.20 | 0.24 | 1.00 | dipeptidylpeptidase 7 [Source:MGI Symbol:Acc:MGI:1933213]                                        |
| ENSMUSG0000003332   | Hsp26        | 0.75 | 0.00 | 0.00 | -0.36 | 0.00 | 0.07 | 0.02  | 0.92 | 1.00 | B cell transition gene 1, anti-proliferative [Source:MGI Symbol:Acc:MGI:38215]                   |
| ENSMUSG00000046761  | Fam83h       | 0.99 | 0.00 | 0.00 | -0.49 | 0.00 | 0.07 | -0.13 | 0.68 | 1.00 | family with sequence similarity 83, member H [Source:MGI Symbol:Acc:MGI:2145900]                 |
| ENSMUSG00000028333  | Anp32b       | 0.79 | 0.00 | 0.00 | -0.32 | 0.02 | 0.22 | 0.25  | 1.15 | 1.00 | acid leucine-rich nuclear phosphoprotein 32 family, member B [Source:MGI Symbol:Acc:MGI:1914878] |
| ENSMUSG00000040761  | Spn          | 0.77 | 0.00 | 0.00 | -0.38 | 0.00 | 0.07 | 0.08  | 0.70 | 1.00 | SPEN homolog, transcriptional regulator (Drosophila) [Source:MGI Symbol:Acc:MGI:1891706]         |
| ENSMUSG000000081894 | Rps2-ps13    | 0.48 | 0.00 | 0.00 | 0.02  | 0.68 | 1.00 | 0.16  | 0.12 | 1.00 | ribosomal protein S2, pseudogene 13 [Source:MGI Symbol:Acc:MGI:3705640]                          |
| ENSMUSG00000021478  | Hsp4         | 0.79 | 0.00 | 0.00 | -0.27 | 0.04 | 0.48 | -0.20 | 0.61 | 1.00 | hyaluronic acid binding protein 2 [Source:MGI Symbol:Acc:MGI:1891713]                            |
| ENSMUSG00000036026  | Tmem63b      | 0.73 | 0.00 | 0.00 | -0.12 | 0.31 | 1.00 | 0.02  | 0.92 | 1.00 | transmembrane protein 63b [Source:MGI Symbol:Acc:MGI:2387609]                                    |
| ENSMUSG000000097906 | RP23-463F7.8 | 0.66 | 0.00 | 0.00 | -0.18 | 0.10 | 0.83 | 0.01  | 1.00 | 1.00 | 0.00                                                                                             |
| ENSMUSG000000061801 | Slc35e3      | 0.74 | 0.00 | 0.00 | -0.18 | 0.15 | 1.00 | 0.01  | 1.00 | 1.00 | solute carrier family 35, member E3 [Source:MGI Symbol:Acc:MGI:2448489]                          |
| ENSMUSG000000022533 | Rps3a3       | 0.91 | 0.00 | 0.00 | -0.25 | 0.01 | 0.11 | 0.16  | 0.20 | 1.00 | ATPase type 13A3 [Source:MGI Symbol:Acc:MGI:3685307]                                             |
| ENSMUSG00000003504  | Reep3        | 0.91 | 0.00 | 0.00 | 0.01  | 0.96 | 1.00 | 0.01  | 0.94 | 1.00 | receptor accessory protein 6 [Source:MGI Symbol:Acc:MGI:1917855]                                 |
| ENSMUSG00000026205  | Slc23a3      | 1.12 | 0.00 | 0.00 | -0.28 | 0.14 | 1.00 | -0.22 | 0.50 | 1.00 | solute carrier family 23 (nucleoside transporters), member 3 [Source:MGI Symbol:Acc:MGI:1045161] |
| ENSMUSG00000030120  | Mi2          | 0.53 | 0.00 | 0.00 | -0.15 | 0.08 | 0.71 | 0.11  | 0.33 | 1.00 | myeloid leukemia factor 2 [Source:MGI Symbol:Acc:MGI:1353554]                                    |
| ENSMUSG00000017009  | Sdc4         | 0.47 | 0.00 | 0.00 | -0.22 | 0.01 | 0.15 | -0.03 | 0.76 | 1.00 | syndecan 4 [Source:MGI Symbol:Acc:MGI:194164]                                                    |
| ENSMUSG000000004394 | Hsp4         | 1.17 | 0.00 | 0.00 | -0.27 | 0.04 | 0.48 | -0.20 | 0.61 | 1.00 | hyaluronic acid binding protein 2 [Source:MGI Symbol:Acc:MGI:1919638]                            |
| ENSMUSG00000037706  | Hsp4         | 0.43 | 0.00 | 0.00 | 0.03  | 0.63 | 1.00 | -0.10 | 0.41 | 1.00 | CD81 antigen [Source:MGI Symbol:Acc:MGI:1906398]                                                 |
| ENSMUSG00000038976  | Ppp1r9b      | 0.87 | 0.00 | 0.00 | -0.28 | 0.05 | 0.55 | -0.01 | 1.00 | 1.00 | protein phosphatase 1, regulatory subunit 9B [Source:MGI Symbol:Acc:MGI:2387581]                 |
| ENSMUSG00000060373  | Hmrcp        | 0.62 | 0.00 | 0.00 | -0.20 | 0.06 | 0.55 | 0.04  | 0.78 | 1.00 | heterogeneous nuclear ribonucleoprotein C [Source:MGI Symbol:Acc:MGI:107795]                     |
| ENSMUSG00000000209  | Hsp90        | 1.04 | 0.00 | 0.00 | -0.30 | 0.10 | 0.11 | 0.16  | 0.93 | 1.00 | interferon gamma receptor 1 [Source:MGI Symbol:Acc:MGI:107655]                                   |
| ENSMUSG00000033616  | Mocos        | 1.25 | 0.00 | 0.00 | -0.50 | 0.02 | 0.26 | 0.01  | 1.00 | 1.00 | molybdenum cofactor sulfatase [Source:MGI Symbol:Acc:MGI:1915841]                                |
| ENSMUSG00000020898  | Ctcf         | 1.09 | 0.00 | 0.00 | -0.26 | 0.16 | 1.00 | -0.08 | 0.85 | 1.00 | CTS telomere maintenance complex component 1 [Source:MGI Symbol:Acc:MGI:1916214]                 |
| ENSMUSG00000005973  | Rcn1         | 1.37 | 0.00 | 0.00 | -0.36 | 0.11 | 0.88 | 0.06  | 0.90 | 1.00 | reticulocalbin 1 [Source:MGI Symbol:Acc:MGI:104559]                                              |
| ENSMUSG00000022234  | Ctcs         | 0.55 | 0.00 | 0.00 | -0.24 | 0.01 | 0.17 | 0.06  | 0.65 | 1.00 | interferon containing Top1, subunit 5 (epsilon) [Source:MGI Symbol:Acc:MGI:107185]               |
| ENSMUSG0000003332   | Hsp26        | 0.75 | 0.00 | 0.00 | -0.36 | 0.00 | 0.07 | 0.02  | 0.92 | 1.00 | B cell transition gene 1, anti-proliferative [Source:MGI Symbol:Acc:MGI:38215]                   |
| ENSMUSG00000025735  | Rhd1d1       | 1.45 | 0.00 | 0.00 | -0.02 | 1.00 | 1.00 | -0.20 | 0.68 | 1.00 | rhomboid, ventral-like 1 (Drosophila) [Source:MGI Symbol:Acc:MGI:2384991]                        |
| ENSMUSG00000041957  | Pkp2         | 1.00 | 0.00 | 0.00 | -0.49 | 0.01 | 0.11 | 0.10  | 0.74 | 1.00 | plakophilin 2 [Source:MGI Symbol:Acc:MGI:1914701]                                                |
| ENSMUSG00000024436  | Mps18b       | 0.85 | 0.00 | 0.00 | -0.27 | 0.07 | 0.65 | 0.07  | 0.79 | 1.00 | mitochondrial ribosomal protein S18B [Source:MGI Symbol:Acc:MGI:1914223]                         |
| ENSMUSG00000000340  | Hsp4         | 1.12 | 0.00 | 0.00 | -0.34 | 0.02 | 0.24 | -0.15 | 0.62 | 1.00 | hyaluronic acid binding protein 2 [Source:MGI Symbol:Acc:MGI:1891713]                            |
| ENSMUSG00000021133  | 4933426M11Rk | 0.55 | 0.00 | 0.00 | 0.01  | 0.88 | 1.00 | 0.02  | 0.92 | 1.00 | RIKEN cDNA 4933426M11 [Source:MGI Symbol:Acc:MGI:2444661]                                        |
| ENSMUSG00000028762  | Gm12366      | 0.50 | 0.00 | 0.00 | 0.02  | 0.79 | 1.00 | 0.17  | 0.14 | 1.00 | predicted gene 12366 [Source:MGI Symbol:Acc:MGI:3649577]                                         |
| ENSMUSG000000080242 | Gm15487      | 0.47 | 0.00 | 0.00 | -0.09 | 0.19 | 1.00 | -0.08 | 0.42 | 1.00 | predicted gene 15487 [Source:MGI Symbol:Acc:MGI:3709610]                                         |
| ENSMUSG00000030591  | Pam8b        | 0.60 | 0.00 | 0.00 | -0.16 | 0.13 | 0.96 | 0.07  | 0.64 | 1.00 | proteasome (prosome, macropan) 26S subunit, non-ATPase, 8 [Source:MGI Symbol:Acc:MGI:1888669]    |
| ENSMUSG0000003332   | Hsp26        | 0.75 | 0.00 | 0.00 | -0.36 | 0.00 | 0.07 | 0.02  | 0.92 | 1.00 | B cell transition gene 1, anti-proliferative [Source:MGI Symbol:Acc:MGI:38215]                   |
| ENSMUSG00000057262  | Gm10020      | 0.59 | 0.00 | 0.00 | -0.07 | 0.49 | 1.00 | 0.07  | 0.62 | 1.00 | predicted pseudogene 10020 [Source:MGI Symbol:Acc:MGI:3642192]                                   |
| ENSMUSG00000022351  | Gz1          | 0.96 | 0.00 | 0.00 | -0.45 | 0.01 | 0.14 | 0.24  | 0.31 | 1.00 | squalene epoxidase [Source:MGI Symbol:Acc:MGI:109296]                                            |
| ENSMUSG00000026588  | Sphe2        | 0.96 | 0.00 | 0.00 | -0.50 | 0.00 | 0.06 | 0.07  | 0.81 | 1.00 | general transcription factor IIF, polypeptide 1 [Source:MGI Symbol:Acc:MGI:1923848]              |
| ENSMUSG00000024121  | Atp9b2c      | 0.46 | 0.00 | 0.00 | -0.10 | 0.15 | 1.00 | -0.09 | 0.35 | 1.00 | ATPase, H+ transporting, lysosomal V0 subunit C [Source:MGI Symbol:Acc:MGI:88116]                |
| ENSMUSG00000017002  | ALP18Rk      | 0.46 | 0.00 | 0.00 | -0.11 | 0.08 | 0.69 | 0.31  | 0.20 | 1.00 | RIKEN cDNA 17002M18Rk [Source:MGI Symbol:Acc:MGI:285466]                                         |
| ENSMUSG00000021213  | Akr1c13      | 1.11 | 0.00 | 0.00 | -0.27 | 0.16 | 1.00 | -0.45 | 0.41 | 1.00 | aldo-keto reductase family 1, member C13 [Source:MGI Symbol:Acc:MGI:1351621]                     |
| ENSMUSG00000028668  | Teeb3        | 0.90 | 0.00 | 0.00 | -0.41 | 0.01 | 0.19 | 0.03  | 0.94 | 1.00 | transcription elongation factor B (SII), polypeptide 3 [Source:MGI Symbol:Acc:MGI:1351315]       |
| ENSMUSG00000044533  | Rps2         | 0.46 | 0.00 | 0.00 | 0.01  | 0.91 | 1.00 | 0.15  | 0.14 | 1.00 | ribosomal protein S2 [Source:MGI Symbol:Acc:MGI:105110]                                          |
| ENSMUSG0000003332   | Hsp26        | 0.75 | 0.00 | 0.00 | -0.36 | 0.00 | 0.07 | 0.02  | 0.92 | 1.00 | B cell transition gene 1, anti-proliferative [Source:MGI Symbol:Acc:MGI:38215]                   |
| ENSMUSG00000031537  | Hkbb         | 0.66 | 0.00 | 0.00 | -0.28 | 0.02 | 0.22 | 0.00  | 1.00 | 1.00 | inhibitor of kappaB kinase beta [Source:MGI Symbol:Acc:MGI:1338071]                              |
| ENSMUSG00000070392  | Gm20634      | 0.87 | 0.00 | 0.00 | -0.45 | 0.01 | 0.10 | -0.07 | 0.82 | 1.00 | predicted gene 20634 [Source:MGI Symbol:Acc:MGI:5313081]                                         |
| ENSMUSG00000060676  | Ef3b         | 0.57 | 0.00 | 0.00 | -0.24 | 0.02 | 0.22 | 0.08  | 0.17 | 1.00 | eukaryotic translation initiation factor 3, subunit B [Source:MGI Symbol:Acc:MGI:106478]         |
| ENSMUSG00000072789  | Gm14920      | 0.46 | 0.00 | 0.00 | 0.02  | 0.77 | 1.00 | 0.16  | 0.55 | 1.00 | predicted gene 14920 [Source:MGI Symbol:Acc:MGI:3704275]                                         |
| ENSMUSG00000073787  | Hsp90        | 0.99 | 0.00 | 0.00 | -0.33 | 0.07 | 0.62 | -0.03 | 0.20 | 1.00 | expressed sequence A150787 [Source:MGI Symbol:Acc:MGI:403323]                                    |
| ENSMUSG00000025287  | Rcp1         | 0.81 | 0.00 | 0.00 | -0.04 | 0.79 | 1.00 | 0.48  | 0.01 | 1.00 | acyl-CoA thioesterase 9 [Source:MGI Symbol:Acc:MGI:1928939]                                      |
| ENSMUSG00000031432  | Pp2r1        | 0.96 | 0.00 | 0.00 | -0.45 | 0.01 | 0.18 | 0.01  | 1.00 | 1.00 | phosphoryl pyrophosphate synthetase 1 [Source:MGI Symbol:Acc:MGI:97775]                          |
| ENSMUSG00000046326  | Swai1        | 1.85 | 0.00 | 0.00 | -0.21 | 0.45 | 1.00 | -0.11 | 0.15 | 1.00 | SIVA1, apoptosis-inducing factor [Source:MGI Symbol:Acc:MGI:1353606]                             |
| ENSMUSG00000030149  | Hsp90        | 0.99 | 0.00 | 0.00 | -0.02 | 0.79 | 1.00 | 0.18  | 0.21 | 1.00 | family with sequence similarity 83, member G [Source:MGI Symbol:Acc:MGI:3644725]                 |
| ENSMUSG00000040952  | Rps19        | 0.51 | 0.00 | 0.00 | -0.02 | 0.80 | 1.00 | 0.00  | 1.00 | 1.00 | ribosomal protein S19 [Source:MGI Symbol:Acc:MGI:1333790]                                        |
| ENSMUSG00000027333  | Smox         | 1.96 | 0.00 | 0.00 | -0.91 | 0.01 | 0.10 | 0.21  | 0.85 | 1.00 | spermine oxidase [Source:MGI Symbol:Acc:MGI:2445356]                                             |
| ENSMUSG00000006538  | Ihh          | 1.20 | 0.00 | 0.00 | -0.15 | 0.50 | 1.00 | -0.05 | 0.91 | 1.00 | Indian hedgehog [Source:MGI Symbol:Acc:MGI:96533]                                                |
| ENSMUSG0000003332   | Hsp26        | 0.75 | 0.00 | 0.00 | -0.36 | 0.00 | 0.07 | 0.02  | 0.92 | 1.00 | interferon-gamma-activated protein kinase kinase 13 [Source:MGI Symbol:Acc:MGI:2444243]          |
| ENSMUSG00000032504  | Pcdh9p       | 0.49 | 0.00 | 0.00 | -0.14 | 0.1  |      |       |      |      |                                                                                                  |

|                      |              |      |      |      |       |      |      |       |      |      |                                                                                                     |
|----------------------|--------------|------|------|------|-------|------|------|-------|------|------|-----------------------------------------------------------------------------------------------------|
| ENSMUSG00000001313   | Rnd2         | 1.32 | 0.00 | 0.00 | -0.60 | 0.02 | 0.25 | -0.06 | 1.00 | 1.00 | Rho family GTPase 2 [Source:MGI Symbol;Acc:MGI:1338755]                                             |
| ENSMUSG000000097142  | AC102815.1   | 0.87 | 0.00 | 0.00 | -0.08 | 0.66 | 0.00 | 0.00  | 1.00 | 1.00 | 0                                                                                                   |
| ENSMUSG000000048107  | H12          | 0.87 | 0.00 | 0.00 | -0.08 | 0.66 | 0.00 | 0.00  | 1.00 | 1.00 | potassium channel tetramerisation domain containing 12 [Source:MGI Symbol;Acc:MGI:2145823]          |
| ENSMUSG00000016554   | Ef3d         | 0.62 | 0.00 | 0.00 | -0.37 | 0.00 | 0.05 | 0.01  | 1.00 | 1.00 | eukaryotic translation initiation factor 3, subunit D [Source:MGI Symbol;Acc:MGI:1933181]           |
| ENSMUSG000000081205  | Gm5940       | 0.52 | 0.00 | 0.00 | -0.12 | 0.23 | 0.10 | 0.02  | 0.91 | 1.00 | predicted gene 5940 [Source:MGI Symbol;Acc:MGI:3648847]                                             |
| ENSMUSG000000095567  | Nacc2        | 0.74 | 0.00 | 0.00 | -0.45 | 0.00 | 0.05 | -0.09 | 0.65 | 1.00 | nucleolar complex associated 2 homolog (S. cerevisiae) [Source:MGI Symbol;Acc:MGI:1931051]          |
| ENSMUSG000000024608  | Rps14        | 0.46 | 0.00 | 0.00 | -0.08 | 0.34 | 0.10 | 0.02  | 0.93 | 1.00 | ribosomal protein S14 [Source:MGI Symbol;Acc:MGI:98107]                                             |
| ENSMUSG000000002622  | Upk3         | 0.46 | 0.00 | 0.00 | -0.07 | 0.44 | 0.10 | 0.00  | 0.95 | 1.00 | cytoskeletal transition initiation factor 3, subunit C [Source:MGI Symbol;Acc:MGI:1929866]          |
| ENSMUSG00000014349   | Ube2z        | 0.62 | 0.00 | 0.00 | -0.35 | 0.00 | 0.07 | 0.05  | 0.81 | 1.00 | ubiquitin-conjugating enzyme E2Z (putative) [Source:MGI Symbol;Acc:MGI:1343160]                     |
| ENSMUSG000000025967  | Eef1b2       | 0.44 | 0.00 | 0.00 | -0.08 | 0.34 | 0.10 | 0.09  | 0.47 | 1.00 | eukaryotic translation elongation factor 1 beta 2 [Source:MGI Symbol;Acc:MGI:1929520]               |
| ENSMUSG000000031578  | Mak16        | 1.08 | 0.00 | 0.00 | -0.56 | 0.01 | 0.16 | 0.11  | 0.76 | 1.00 | MAK16 homolog (S. cerevisiae) [Source:MGI Symbol;Acc:MGI:1915170]                                   |
| ENSMUSG000000003622  | Upk2         | 0.63 | 0.00 | 0.00 | -0.23 | 0.07 | 0.05 | 0.06  | 0.77 | 1.00 | impartin 5 [Source:MGI Symbol;Acc:MGI:1917822]                                                      |
| ENSMUSG000000031149  | Praf2        | 1.50 | 0.00 | 0.00 | -0.50 | 0.08 | 0.69 | -0.11 | 1.00 | 1.00 | FR1 domain family 2 [Source:MGI Symbol;Acc:MGI:1856607]                                             |
| ENSMUSG0000000016256 | Csz2         | 0.48 | 0.00 | 0.00 | -0.08 | 0.40 | 0.10 | -0.10 | 0.43 | 1.00 | cathepsin Z [Source:MGI Symbol;Acc:MGI:1891190]                                                     |
| ENSMUSG000000027422  | Rrbp1        | 0.49 | 0.00 | 0.00 | -0.21 | 0.03 | 0.34 | 0.07  | 0.58 | 1.00 | ribosome binding protein 1 [Source:MGI Symbol;Acc:MGI:1932395]                                      |
| ENSMUSG000000029364  | Gm1          | 0.48 | 0.00 | 0.00 | -0.18 | 0.06 | 0.56 | 0.07  | 0.62 | 1.00 | guanine nucleotide binding protein (G protein), beta 1 [Source:MGI Symbol;Acc:MGI:95781]            |
| ENSMUSG000000009516  | Gm111974     | 2.43 | 0.00 | 0.00 | -0.24 | 0.48 | 0.10 | 0.27  | 0.79 | 1.00 | predicted gene 111974 [Source:MGI Symbol;Acc:MGI:3650059]                                           |
| ENSMUSG000000021222  | Deaf4        | 1.60 | 0.00 | 0.00 | -0.11 | 0.71 | 0.10 | -0.18 | 0.86 | 1.00 | DDB1 and CUL4 associated factor 4 [Source:MGI Symbol;Acc:MGI:1921078]                               |
| ENSMUSG000000085042  | 2010001M06Rk | 1.85 | 0.00 | 0.00 | 0.45  | 0.12 | 0.92 | 0.24  | 0.85 | 1.00 | RIKEN cDNA 2010001M06 gene [Source:MGI Symbol;Acc:MGI:1917062]                                      |
| ENSMUSG000000090544  | Gm6576       | 0.47 | 0.00 | 0.00 | 0.03  | 0.70 | 0.10 | 0.20  | 0.11 | 1.00 | predicted gene 6576 [Source:MGI Symbol;Acc:MGI:3646644]                                             |
| ENSMUSG000000002811  | Sarnc3       | 0.31 | 0.00 | 0.00 | 0.00  | 0.96 | 0.10 | 0.10  | 0.24 | 1.00 | serine incorporator 3 [Source:MGI Symbol;Acc:MGI:1349457]                                           |
| ENSMUSG000000001665  | Gat33        | 0.65 | 0.00 | 0.00 | 0.01  | 0.97 | 0.10 | -0.23 | 0.19 | 1.00 | glutathione S-transferase, theta 3 [Source:MGI Symbol;Acc:MGI:2143526]                              |
| ENSMUSG000000081094  | Rpl19-ps11   | 0.56 | 0.00 | 0.00 | -0.06 | 0.60 | 0.10 | 0.04  | 0.83 | 1.00 | ribosomal protein L19, pseudogene 11 [Source:MGI Symbol;Acc:MGI:3642193]                            |
| ENSMUSG000000024583  | Tm11         | 0.57 | 0.00 | 0.00 | -0.29 | 0.01 | 0.17 | 0.05  | 0.76 | 1.00 | thioredoxin-like 1 [Source:MGI Symbol;Acc:MGI:1860078]                                              |
| ENSMUSG000000028495  | Rps6         | 0.39 | 0.00 | 0.00 | -0.12 | 0.06 | 0.61 | 0.04  | 0.69 | 1.00 | ribosomal protein S6 [Source:MGI Symbol;Acc:MGI:98159]                                              |
| ENSMUSG000000002420  | Hist2ha2     | 0.48 | 0.00 | 0.00 | -0.07 | 0.48 | 0.10 | 0.05  | 0.97 | 1.00 | NSL1 (p97) cofactor (p47) [Source:MGI Symbol;Acc:MGI:3042273]                                       |
| ENSMUSG000000034930  | Rtkn         | 0.88 | 0.00 | 0.00 | -0.08 | 0.68 | 0.10 | 0.05  | 0.93 | 1.00 | rheikin [Source:MGI Symbol;Acc:MGI:107371]                                                          |
| ENSMUSG000000085006  | BC021767     | 1.70 | 0.00 | 0.00 | -0.75 | 0.02 | 0.29 | -0.11 | 1.00 | 1.00 | cDNA sequence BC021767 [Source:MGI Symbol;Acc:MGI:3615512]                                          |
| ENSMUSG000000020308  | Cry1         | 2.49 | 0.00 | 0.00 | -0.90 | 0.04 | 0.41 | 0.94  | 0.30 | 1.00 | cryptochrome 1 (photolyase-like) [Source:MGI Symbol;Acc:MGI:1270841]                                |
| ENSMUSG000000016526  | Dykc3        | 2.48 | 0.00 | 0.00 | -1.12 | 0.02 | 0.22 | -0.11 | 0.97 | 1.00 | phosphotyrosine tyrosine (1-phosphorylation) regulated kinase 3 [Source:MGI Symbol;Acc:MGI:1330300] |
| ENSMUSG000000032369  | Pisp1        | 0.68 | 0.00 | 0.00 | -0.35 | 0.01 | 0.17 | -0.10 | 0.59 | 1.00 | phospholipid scramblase 1 [Source:MGI Symbol;Acc:MGI:893575]                                        |
| ENSMUSG000000006974  | Psm3         | 0.55 | 0.00 | 0.00 | -0.16 | 0.17 | 0.10 | 0.02  | 0.97 | 1.00 | proteasome (prosome, macropain) subunit, beta type 3 [Source:MGI Symbol;Acc:MGI:1347014]            |
| ENSMUSG000000037440  | Vrn1         | 0.74 | 0.00 | 0.00 | 0.48  | 0.00 | 0.01 | -0.21 | 0.29 | 1.00 | vanin 1 [Source:MGI Symbol;Acc:MGI:108395]                                                          |
| ENSMUSG000000079709  | 9030025P20Rk | 0.67 | 0.00 | 0.00 | -0.23 | 0.08 | 0.73 | -0.06 | 0.77 | 1.00 | RIKEN cDNA 9030025P20 gene [Source:MGI Symbol;Acc:MGI:3583895]                                      |
| ENSMUSG000000004620  | Hist2ha2     | 0.79 | 0.00 | 0.00 | -0.07 | 0.48 | 0.10 | 0.05  | 0.74 | 1.00 | histone cluster 2, H2aa2 [Source:MGI Symbol;Acc:MGI:2448283]                                        |
| ENSMUSG000000019590  | Cy5b61       | 0.75 | 0.00 | 0.00 | -0.19 | 0.23 | 0.10 | 0.08  | 0.77 | 1.00 | cytochrome b-561 [Source:MGI Symbol;Acc:MGI:103253]                                                 |
| ENSMUSG000000022462  | Slc38a2      | 0.60 | 0.00 | 0.00 | -0.37 | 0.00 | 0.05 | 0.19  | 0.30 | 1.00 | solute carrier family 38, member 2 [Source:MGI Symbol;Acc:MGI:1915010]                              |
| ENSMUSG000000037331  | Larp1        | 0.50 | 0.00 | 0.00 | -0.21 | 0.04 | 0.45 | 0.05  | 0.70 | 1.00 | La ribonucleoprotein domain family, member 1 [Source:MGI Symbol;Acc:MGI:1890165]                    |
| ENSMUSG000000033029  | 170008B04Rk  | 0.87 | 0.00 | 0.00 | -0.25 | 0.21 | 0.10 | -0.02 | 0.40 | 1.00 | RIKEN cDNA 170008B04 gene [Source:MGI Symbol;Acc:MGI:1920774]                                       |
| ENSMUSG000000042989  | Kar3         | 0.89 | 0.00 | 0.00 | -0.40 | 0.01 | 0.19 | -0.17 | 0.53 | 1.00 | KN motif and ankyrin repeat domains 3 [Source:MGI Symbol;Acc:MGI:1098615]                           |
| ENSMUSG000000063954  | Hist2h2aa1   | 0.85 | 0.00 | 0.00 | -0.40 | 0.02 | 0.30 | -0.10 | 0.74 | 1.00 | histone cluster 2, H2aa1 [Source:MGI Symbol;Acc:MGI:96097]                                          |
| ENSMUSG000000002319  | Ipo4         | 0.56 | 0.00 | 0.00 | -0.26 | 0.03 | 0.33 | 0.02  | 0.93 | 1.00 | importin 4 [Source:MGI Symbol;Acc:MGI:1923001]                                                      |
| ENSMUSG000000006547  | Rps2-ps6     | 0.48 | 0.00 | 0.00 | 0.02  | 0.83 | 0.10 | 0.17  | 0.18 | 1.00 | ribosomal protein S2, pseudogene 6 [Source:MGI Symbol;Acc:MGI:3644876]                              |
| ENSMUSG000000002820  | Rps2-ps6     | 0.48 | 0.00 | 0.00 | -0.12 | 0.04 | 0.45 | -0.07 | 0.61 | 1.00 | heterogeneous nuclear ribonucleoprotein M [Source:MGI Symbol;Acc:MGI:1926465]                       |
| ENSMUSG000000002708  | Psm5-c5      | 0.55 | 0.00 | 0.00 | -0.19 | 0.10 | 0.81 | 0.07  | 0.68 | 1.00 | protease (prosome, macropain) 26S subunit, ATPase 5 [Source:MGI Symbol;Acc:MGI:105047]              |
| ENSMUSG000000030744  | Rps3         | 0.34 | 0.00 | 0.00 | -0.05 | 0.40 | 0.10 | -0.04 | 0.70 | 1.00 | ribosomal protein S3 [Source:MGI Symbol;Acc:MGI:1350917]                                            |
| ENSMUSG000000065862  | SNORA67      | 1.01 | 0.00 | 0.00 | -0.61 | 0.00 | 0.09 | 0.12  | 0.77 | 1.00 | Small nuclear RNA SNORA67 [Source:RFAM;Acc:RF00272]                                                 |
| ENSMUSG000000002633  | Irrm1        | 0.57 | 0.00 | 0.00 | -0.19 | 0.10 | 0.10 | -0.10 | 0.52 | 1.00 | inositol polyphosphate kinase [Source:MGI Symbol;Acc:MGI:1916968]                                   |
| ENSMUSG000000070462  | Mesd1        | 1.33 | 0.00 | 0.00 | -0.63 | 0.02 | 0.27 | -0.01 | 1.00 | 1.00 | mesoderm development candidate 1 [Source:MGI Symbol;Acc:MGI:1891420]                                |
| ENSMUSG0000000040734 | Ppp1131      | 1.81 | 0.00 | 0.00 | -0.82 | 0.02 | 0.27 | -0.06 | 1.00 | 1.00 | protein phosphatase 1, regulatory (inhibitor) subunit 13 like [Source:MGI Symbol;Acc:MGI:3525053]   |
| ENSMUSG0000000032577 | Mapkap3      | 1.54 | 0.00 | 0.00 | -0.28 | 0.34 | 0.10 | -0.07 | 1.00 | 1.00 | mitogen-activated protein kinase-activated protein kinase 3 [Source:MGI Symbol;Acc:MGI:2143163]     |
| ENSMUSG00000004037   | Als2c1       | 0.72 | 0.00 | 0.00 | -0.35 | 0.02 | 0.25 | -0.22 | 0.28 | 1.00 | ALS2 C-terminal like [Source:MGI Symbol;Acc:MGI:2447523]                                            |
| ENSMUSG000000002820  | Rps2-ps6     | 0.48 | 0.00 | 0.00 | -0.12 | 0.04 | 0.45 | -0.07 | 0.51 | 1.00 | ribosomal protein S2, pseudogene 5 [Source:MGI Symbol;Acc:MGI:2445179]                              |
| ENSMUSG000000002708  | Psm5-c5      | 0.55 | 0.00 | 0.00 | -0.19 | 0.10 | 0.81 | 0.07  | 0.68 | 1.00 | protease (prosome, macropain) 26S subunit, ATPase 5 [Source:MGI Symbol;Acc:MGI:105047]              |
| ENSMUSG000000030744  | Rps3         | 0.34 | 0.00 | 0.00 | -0.05 | 0.40 | 0.10 | -0.04 | 0.70 | 1.00 | ribosomal protein S3 [Source:MGI Symbol;Acc:MGI:1350917]                                            |
| ENSMUSG000000065862  | SNORA67      | 1.01 | 0.00 | 0.00 | -0.61 | 0.00 | 0.09 | 0.12  | 0.77 | 1.00 | Small nuclear RNA SNORA67 [Source:RFAM;Acc:RF00272]                                                 |
| ENSMUSG000000002633  | Irrm1        | 0.57 | 0.00 | 0.00 | -0.19 | 0.10 | 0.10 | -0.10 | 0.52 | 1.00 | inositol polyphosphate kinase [Source:MGI Symbol;Acc:MGI:1916968]                                   |
| ENSMUSG000000070462  | Mesd1        | 1.33 | 0.00 | 0.00 | -0.63 | 0.02 | 0.27 | -0.01 | 1.00 | 1.00 | mesoderm development candidate 1 [Source:MGI Symbol;Acc:MGI:1891420]                                |
| ENSMUSG0000000040734 | Ppp1131      | 1.81 | 0.00 | 0.00 | -0.82 | 0.02 | 0.27 | -0.06 | 1.00 | 1.00 | protein phosphatase 1, regulatory (inhibitor) subunit 13 like [Source:MGI Symbol;Acc:MGI:3525053]   |
| ENSMUSG0000000032577 | Mapkap3      | 1.54 | 0.00 | 0.00 | -0.28 | 0.34 | 0.10 | -0.07 | 1.00 | 1.00 | mitogen-activated protein kinase-activated protein kinase 3 [Source:MGI Symbol;Acc:MGI:2143163]     |
| ENSMUSG00000004037   | Als2c1       | 0.72 | 0.00 | 0.00 | -0.35 | 0.02 | 0.25 | -0.22 | 0.28 | 1.00 | ALS2 C-terminal like [Source:MGI Symbol;Acc:MGI:2447523]                                            |
| ENSMUSG000000002820  | Rps2-ps6     | 0.48 | 0.00 | 0.00 | -0.12 | 0.04 | 0.45 | -0.07 | 0.51 | 1.00 | ribosomal protein S2, pseudogene 5 [Source:MGI Symbol;Acc:MGI:2445179]                              |
| ENSMUSG000000002708  | Psm5-c5      | 0.55 | 0.00 | 0.00 | -0.19 | 0.10 | 0.81 | 0.07  | 0.68 | 1.00 | protease (prosome, macropain) 26S subunit, ATPase 5 [Source:MGI Symbol;Acc:MGI:105047]              |
| ENSMUSG000000030744  | Rps3         | 0.34 | 0.00 | 0.00 | -0.05 | 0.40 | 0.10 | -0.04 | 0.70 | 1.00 | ribosomal protein S3 [Source:MGI Symbol;Acc:MGI:1350917]                                            |
| ENSMUSG000000065862  | SNORA67      | 1.01 | 0.00 | 0.00 | -0.61 | 0.00 | 0.09 | 0.12  | 0.77 | 1.00 | Small nuclear RNA SNORA67 [Source:RFAM;Acc:RF00272]                                                 |
| ENSMUSG000000002633  | Irrm1        | 0.57 | 0.00 | 0.00 | -0.19 | 0.10 | 0.10 | -0.10 | 0.52 | 1.00 | inositol polyphosphate kinase [Source:MGI Symbol;Acc:MGI:1916968]                                   |
| ENSMUSG000000070462  | Mesd1        | 1.33 | 0.00 | 0.00 | -0.63 | 0.02 | 0.27 | -0.01 | 1.00 | 1.00 | mesoderm development candidate 1 [Source:MGI Symbol;Acc:MGI:1891420]                                |
| ENSMUSG0000000040734 | Ppp1131      | 1.81 | 0.00 | 0.00 | -0.82 | 0.02 | 0.27 | -0.06 | 1.00 | 1.00 | protein phosphatase 1, regulatory (inhibitor) subunit 13 like [Source:MGI Symbol;Acc:MGI:3525053]   |
| ENSMUSG0000000032577 | Mapkap3      | 1.54 | 0.00 | 0.00 | -0.28 | 0.34 | 0.10 | -0.07 | 1.00 | 1.00 | mitogen-activated protein kinase-activated protein kinase 3 [Source:MGI Symbol;Acc:MGI:2143163]     |
| ENSMUSG00000004037   | Als2c1       | 0.72 | 0.00 | 0.00 | -0.35 | 0.02 | 0.25 | -0.22 | 0.28 | 1.00 | ALS2 C-terminal like [Source:MGI Symbol;Acc:MGI:2447523]                                            |
| ENSMUSG000000002820  | Rps2-ps6     | 0.48 | 0.00 | 0.00 | -0.12 | 0.04 | 0.45 | -0.07 | 0.51 | 1.00 | ribosomal protein S2, pseudogene 5 [Source:MGI Symbol;Acc:MGI:2445179]                              |
| ENSMUSG000000002708  | Psm5-c5      | 0.55 | 0.00 | 0.00 | -0.19 | 0.10 | 0.81 | 0.07  | 0.68 | 1.00 | protease (prosome, macropain) 26S subunit, ATPase 5 [Source:MGI Symbol;Acc:MGI:105047]              |
| ENSMUSG000000030744  | Rps3         | 0.34 | 0.00 | 0.00 | -0.05 | 0.40 | 0.10 | -0.04 | 0.70 | 1.00 | ribosomal protein S3 [Source:MGI Symbol;Acc:MGI:1350917]                                            |
| ENSMUSG000000065862  | SNORA67      | 1.01 | 0.00 | 0.00 | -0.61 | 0.00 | 0.09 | 0.12  | 0.77 | 1.00 | Small nuclear RNA SNORA67 [Source:RFAM;Acc:RF00272]                                                 |
| ENSMUSG000000002633  | Irrm1        | 0.57 | 0.00 | 0.00 | -0.19 | 0.10 | 0.10 | -0.10 | 0.52 | 1.00 | inositol polyphosphate kinase [Source:MGI Symbol;Acc:MGI:1916968]                                   |
| ENSMUSG000000070462  | Mesd1        | 1.33 | 0.00 | 0.00 | -0.63 | 0.02 | 0.27 | -0.01 | 1.00 | 1.00 | mesoderm development candidate 1 [Source:MGI Symbol;Acc:MGI:1891420]                                |
| ENSMUSG0000000040734 | Ppp1131      | 1.81 | 0.00 | 0.00 | -0.82 | 0.02 | 0.27 | -0.06 | 1.00 | 1.00 | protein phosphatase 1, regulatory (inhibitor) subunit 13 like [Source:MGI Symbol;Acc:MGI:3525053]   |
| ENSMUSG0000000032577 | Mapkap3      | 1.54 | 0.00 | 0.00 | -0.28 | 0.34 | 0.10 | -0.07 | 1.00 | 1.00 | mitogen-activated protein kinase-activated protein kinase 3 [Source:MGI Symbol;Acc:MGI:2143163]     |
| ENSMUSG00000004037   | Als2c1       | 0.72 | 0.00 | 0.00 | -0.35 | 0.02 | 0.25 | -0.22 | 0.28 | 1.00 | ALS2 C-terminal like [Source:MGI Symbol;Acc:MGI:2447523]                                            |
| ENSMUSG000000002820  | Rps2-ps6     | 0.48 | 0.00 | 0.00 | -0.12 | 0.04 | 0.45 | -0.07 | 0.51 | 1.00 | ribosomal protein S2, pseudogene 5 [Source:MGI Symbol;Acc:MGI:2445179]                              |
| ENSMUSG000000002708  | Psm5-c5      | 0.55 | 0.00 | 0.00 | -0.19 | 0.10 | 0.81 | 0.07  | 0.68 | 1.00 | protease (prosome, macropain) 26S subunit, ATPase 5 [Source:MGI Symbol;Acc:MGI:105047]              |
| ENSMUSG000000030744  | Rps3         | 0.34 | 0.00 | 0.00 | -0.05 | 0.40 | 0.10 | -0.04 | 0.70 | 1.00 | ribosomal protein S3 [Source:MGI Symbol;Acc:MGI:1350917]                                            |
| ENSMUSG000000065862  | SNORA67      | 1.01 | 0.00 | 0.00 | -0.61 | 0.00 | 0.09 | 0.12  | 0.77 | 1.00 | Small nuclear RNA SNORA67 [Source:RFAM;Acc:RF00272]                                                 |
| ENSMUSG000000002633  | Irrm1        | 0.57 | 0.00 | 0.00 | -0.19 | 0.10 | 0.10 | -0.10 | 0.52 | 1.00 | inositol polyphosphate kinase [Source:MGI Symbol;Acc                                                |

|                      |              |      |      |      |       |      |      |       |      |      |                                                                                                                    |
|----------------------|--------------|------|------|------|-------|------|------|-------|------|------|--------------------------------------------------------------------------------------------------------------------|
| ENSMUSG000000033088  | Triopb       | 0.77 | 0.00 | 0.00 | -0.22 | 0.23 | 1.00 | 0.09  | 0.75 | 1.00 | TRIO and F-actin binding protein [Source:MGJ Symbol:Acc:MGJ:1349410]                                               |
| ENSMUSG0000001379    | Apab3        | 0.95 | 0.00 | 0.00 | -0.62 | 0.01 | 0.09 | -0.07 | 0.92 | 1.00 | amivoid beta (AA) precursor protein-binding, family B, member 3 [Source:MGJ Symbol:Acc:MGJ:108404]                 |
| ENSMUSG0000000250    | Cyfl1        | 0.60 | 0.00 | 0.00 | -0.33 | 0.02 | 0.27 | -0.12 | 0.52 | 1.00 | methyl-Cyt binding domain protein 5 [Source:MGJ Symbol:Acc:MGJ:106378]                                             |
| ENSMUSG0000001240    | Ramr2        | 0.52 | 0.00 | 0.00 | -0.09 | 0.43 | 1.00 | 0.02  | 0.93 | 1.00 | receptor (calcitonin) activity modifying protein 2 [Source:MGJ Symbol:Acc:MGJ:1856650]                             |
| ENSMUSG0000001078    | Nr2c2ap      | 1.00 | 0.00 | 0.00 | -0.65 | 0.00 | 0.08 | -0.05 | 1.00 | 1.00 | nuclear receptor 2C2-associated protein [Source:MGJ Symbol:Acc:MGJ:1922942]                                        |
| ENSMUSG0000000450    | Coro1c       | 0.58 | 0.00 | 0.00 | -0.06 | 0.67 | 1.00 | 0.08  | 0.68 | 1.00 | coronin, actin binding protein 1C [Source:MGJ Symbol:Acc:MGJ:1345964]                                              |
| ENSMUSG0000002022    | Rhbfl1       | 0.65 | 0.00 | 0.00 | -0.32 | 0.04 | 0.45 | -0.15 | 0.50 | 1.00 | thomboid family 1 (Drosophila) [Source:MGJ Symbol:Acc:MGJ:104328]                                                  |
| ENSMUSG0000000145    | Traf1        | 0.75 | 0.00 | 0.00 | -0.32 | 0.04 | 0.45 | -0.15 | 0.74 | 1.00 | TRAF-like zinc finger domain containing 1 [Source:MGJ Symbol:Acc:MGJ:1923511]                                      |
| ENSMUSG0000000592    | E1f5a2       | 1.46 | 0.00 | 0.00 | -0.73 | 0.03 | 0.37 | 0.04  | 1.00 | 1.00 | eukaryotic translation initiation factor 5A2 [Source:MGJ Symbol:Acc:MGJ:1933735]                                   |
| ENSMUSG00000003674   | Rpl41        | 0.47 | 0.00 | 0.00 | -0.02 | 0.76 | 1.00 | 0.09  | 0.47 | 1.00 | ribosomal protein L41 [Source:MGJ Symbol:Acc:MGJ:1915195]                                                          |
| ENSMUSG00000006328   | Gm7655       | 1.11 | 0.00 | 0.00 | -0.24 | 0.33 | 1.00 | 0.08  | 1.00 | 1.00 | predicted pseudogene 7655 [Source:MGJ Symbol:Acc:MGJ:3645651]                                                      |
| ENSMUSG0000000029    | Sh3p1        | 0.75 | 0.00 | 0.00 | -0.20 | 0.16 | 1.00 | 0.10  | 0.10 | 1.00 | signal transducer and activator of transcription 3 SH3 domain and ITAM motif 1 [Source:MGJ Symbol:Acc:MGJ:1320014] |
| ENSMUSG0000001458    | Trp4         | 0.75 | 0.00 | 0.00 | -0.05 | 0.58 | 1.00 | -0.04 | 0.73 | 1.00 | transient receptor potential cation channel, subfamily V, member 4 [Source:MGJ Symbol:Acc:MGJ:1926945]             |
| ENSMUSG00000059291   | Rpl11        | 0.35 | 0.00 | 0.00 | -0.06 | 0.38 | 1.00 | 0.02  | 0.89 | 1.00 | ribosomal protein L11 [Source:MGJ Symbol:Acc:MGJ:1914275]                                                          |
| ENSMUSG00000020736   | Nf5c         | 0.92 | 0.00 | 0.00 | -0.18 | 0.40 | 1.00 | 0.03  | 1.00 | 1.00 | 5',3'-nucleotidase, cytosolic [Source:MGJ Symbol:Acc:MGJ:1354954]                                                  |
| ENSMUSG00000024456   | Dap1         | 0.65 | 0.00 | 0.00 | -0.27 | 0.08 | 0.68 | -0.10 | 0.69 | 1.00 | diaphanous homolog 1 (Drosophila) [Source:MGJ Symbol:Acc:MGJ:1194490]                                              |
| ENSMUSG00000008908   | Gm142679     | 0.67 | 0.00 | 0.00 | -0.19 | 0.25 | 1.00 | 0.04  | 0.89 | 1.00 | predicted gene 14279 [Source:MGJ Symbol:Acc:MGJ:3625786]                                                           |
| ENSMUSG00000021236   | Entpd5       | 0.29 | 0.00 | 0.00 | -0.05 | 0.40 | 1.00 | 0.07  | 0.44 | 1.00 | ectonucleoside triphosphate diphosphohydrolase 5 [Source:MGJ Symbol:Acc:MGJ:1321385]                               |
| ENSMUSG00000003698   | BC037034     | 0.78 | 0.00 | 0.00 | -0.39 | 0.03 | 0.39 | -0.16 | 0.55 | 1.00 | cDNA sequence BC037034 [Source:MGJ Symbol:Acc:MGJ:2385896]                                                         |
| ENSMUSG00000007945   | Rpl36a       | 0.49 | 0.00 | 0.00 | -0.11 | 0.32 | 1.00 | 0.07  | 0.64 | 1.00 | ribosomal protein L36a [Source:MGJ Symbol:Acc:MGJ:1201789]                                                         |
| ENSMUSG00000000429   | Cyfl1        | 0.67 | 0.00 | 0.00 | -0.33 | 0.02 | 0.27 | -0.12 | 0.07 | 1.00 | procollagen lysine 2-oxoglutarate 5-deoxygenase 2 [Source:MGJ Symbol:Acc:MGJ:1347007]                              |
| ENSMUSG00000027646   | Sic          | 0.72 | 0.00 | 0.00 | -0.27 | 0.13 | 0.98 | 0.04  | 0.88 | 1.00 | Rous sarcoma oncogene [Source:MGJ Symbol:Acc:MGJ:98397]                                                            |
| ENSMUSG00000006304   | Arp2c        | 0.39 | 0.00 | 0.00 | -0.13 | 0.15 | 1.00 | 0.08  | 0.51 | 1.00 | actin related protein 2/3 complex, subunit 2 [Source:MGJ Symbol:Acc:MGJ:1923959]                                   |
| ENSMUSG00000003602   | B230312A22Rk | 0.89 | 0.00 | 0.00 | -0.62 | 0.00 | 0.08 | -0.02 | 1.00 | 1.00 | RIKEN cDNA B230312A22 gene [Source:MGJ Symbol:Acc:MGJ:2441854]                                                     |
| ENSMUSG00000002871   | Trp1         | 0.85 | 0.00 | 0.00 | -0.42 | 0.01 | 0.14 | -0.10 | 0.67 | 1.00 | transmembrane protein, apolipoprotein associated 1 [Source:MGJ Symbol:Acc:MGJ:1345190]                             |
| ENSMUSG00000000319   | Trp9         | 0.63 | 0.00 | 0.00 | -0.46 | 0.00 | 0.05 | -0.10 | 0.62 | 1.00 | transmembrane protein homolog A (Chlamydomonas) [Source:MGJ Symbol:Acc:MGJ:3027894]                                |
| ENSMUSG00000002802   | Sh3d19       | 0.46 | 0.00 | 0.00 | -0.09 | 0.40 | 1.00 | 0.10  | 0.49 | 1.00 | SH3 domain protein D19 [Source:MGJ Symbol:Acc:MGJ:1350223]                                                         |
| ENSMUSG00000002832   | Pamc2        | 0.47 | 0.00 | 0.00 | -0.27 | 0.02 | 0.22 | 0.04  | 0.78 | 1.00 | proteasome (prosome, macropain) 26S subunit, ATPase 2 [Source:MGJ Symbol:Acc:MGJ:109555]                           |
| ENSMUSG000000025485  | Ric8         | 0.71 | 0.00 | 0.00 | -0.30 | 0.08 | 0.68 | -0.03 | 0.94 | 1.00 | resistance to inhibitors of cholinesterase B homolog (C. elegans) [Source:MGJ Symbol:Acc:MGJ:2141866]              |
| ENSMUSG00000026456   | Cyfl51       | 0.75 | 0.00 | 0.00 | -0.12 | 0.52 | 1.00 | -0.05 | 0.57 | 1.00 | cytochrome b5 reductase 1 [Source:MGJ Symbol:Acc:MGJ:1919287]                                                      |
| ENSMUSG00000009564   | A43005704Rk  | 1.37 | 0.00 | 0.00 | -0.24 | 0.44 | 1.00 | 0.14  | 0.87 | 1.00 | RIKEN cDNA A43005704 gene [Source:MGJ Symbol:Acc:MGJ:2442125]                                                      |
| ENSMUSG00000042506   | Usp22        | 0.64 | 0.00 | 0.00 | -0.23 | 0.13 | 0.96 | 0.09  | 0.66 | 1.00 | ubiquitin specific peptidase 22 [Source:MGJ Symbol:Acc:MGJ:2144157]                                                |
| ENSMUSG00000040296   | Dad58        | 0.89 | 0.00 | 0.00 | -0.22 | 0.31 | 1.00 | -0.02 | 1.00 | 1.00 | DEAD (Asp-Glu-Ala) box polypeptide 58 [Source:MGJ Symbol:Acc:MGJ:2442858]                                          |
| ENSMUSG00000025228   | Actr1a       | 0.49 | 0.00 | 0.00 | -0.24 | 0.04 | 0.44 | 0.07  | 0.70 | 1.00 | ARP1 actin-related protein 1A, centrin alpha [Source:MGJ Symbol:Acc:MGJ:1858964]                                   |
| ENSMUSG00000003922   | Gm72         | 0.52 | 0.00 | 0.00 | -0.11 | 0.34 | 1.00 | 0.11  | 0.47 | 1.00 | RNA recognition particle 72 [Source:MGJ Symbol:Acc:MGJ:1333795]                                                    |
| ENSMUSG00000027804   | Ppid         | 0.68 | 0.00 | 0.00 | -0.46 | 0.01 | 0.13 | 0.14  | 0.57 | 1.00 | peptidylprolyl isomerase D (cyclophilin D) [Source:MGJ Symbol:Acc:MGJ:1914988]                                     |
| ENSMUSG000000079139  | Gm4204       | 0.96 | 0.00 | 0.00 | -0.56 | 0.02 | 0.22 | 0.05  | 0.92 | 1.00 | predicted gene 4204 [Source:MGJ Symbol:Acc:MGJ:3782381]                                                            |
| ENSMUSG000000020893  | Per1         | 0.68 | 0.00 | 0.00 | -0.19 | 0.25 | 1.00 | -0.09 | 0.71 | 1.00 | period homology 1 (Drosophila) [Source:MGJ Symbol:Acc:MGJ:1098283]                                                 |
| ENSMUSG000000031799  | Trp9         | 0.63 | 0.00 | 0.00 | -0.46 | 0.00 | 0.05 | -0.10 | 0.62 | 1.00 | tropomyosin 4 [Source:MGJ Symbol:Acc:MGJ:2449202]                                                                  |
| ENSMUSG00000000881   | Rpl33a       | 0.50 | 0.00 | 0.00 | -0.05 | 0.40 | 1.00 | 0.05  | 0.91 | 1.00 | ribosomal protein S3A [Source:MGJ Symbol:Acc:MGJ:1202063]                                                          |
| ENSMUSG000000039067  | Pemf2        | 0.54 | 0.00 | 0.00 | -0.36 | 0.01 | 0.10 | -0.08 | 0.66 | 1.00 | proteasome (prosome, macropain) 26S subunit, non-ATPase, 7 [Source:MGJ Symbol:Acc:MGJ:1351511]                     |
| ENSMUSG000000004562  | Ahgef40      | 0.80 | 0.00 | 0.00 | -0.33 | 0.09 | 0.73 | -0.16 | 0.59 | 1.00 | Rho guanine nucleotide exchange factor (GEF) 40 [Source:MGJ Symbol:Acc:MGJ:2685515]                                |
| ENSMUSG000000006920  | Ezh1         | 0.51 | 0.00 | 0.00 | -0.11 | 0.39 | 1.00 | -0.12 | 0.50 | 1.00 | enhancer of zeste homolog 1 (Drosophila) [Source:MGJ Symbol:Acc:MGJ:1097695]                                       |
| ENSMUSG000000002542  | Gm72         | 0.52 | 0.00 | 0.00 | -0.11 | 0.47 | 1.00 | -0.11 | 0.52 | 1.00 | signal transducer and activator of transcription 6 [Source:MGJ Symbol:Acc:MGJ:1930334]                             |
| ENSMUSG000000081406  | Rpl8b-ps4    | 0.38 | 0.00 | 0.00 | -0.11 | 0.18 | 1.00 | 0.05  | 0.71 | 1.00 | ribosomal protein S8, pseudogene 4 [Source:MGJ Symbol:Acc:MGJ:3650907]                                             |
| ENSMUSG00000047126   | Ctrc         | 0.30 | 0.00 | 0.00 | -0.01 | 0.90 | 1.00 | 0.11  | 0.22 | 1.00 | clathrin, heavy polypeptide (Ho) [Source:MGJ Symbol:Acc:MGJ:2388633]                                               |
| ENSMUSG000000043424  | E1f32        | 0.65 | 0.00 | 0.00 | -0.38 | 0.02 | 0.23 | 0.23  | 0.26 | 1.00 | eukaryotic translation initiation factor 3, subunit J2 [Source:MGJ Symbol:Acc:MGJ:3704486]                         |
| ENSMUSG00000019437   | Ticl1        | 0.34 | 0.00 | 0.00 | -0.08 | 0.28 | 1.00 | 0.03  | 0.28 | 1.00 | TLC domain containing 1 [Source:MGJ Symbol:Acc:MGJ:1915722]                                                        |
| ENSMUSG000000070436  | Serpin11     | 0.64 | 0.00 | 0.00 | -0.30 | 0.05 | 0.48 | 0.14  | 0.50 | 1.00 | serpin (or cysteine) peptidase inhibitor, clade H, member 1 [Source:MGJ Symbol:Acc:MGJ:88283]                      |
| ENSMUSG00000002230   | E430025E21Rk | 0.55 | 0.00 | 0.00 | -0.23 | 0.09 | 0.74 | -0.04 | 0.88 | 1.00 | RIKEN cDNA E430025E21 gene [Source:MGJ Symbol:Acc:MGJ:2146110]                                                     |
| ENSMUSG000000025809  | hgr1         | 0.35 | 0.00 | 0.00 | -0.23 | 0.00 | 0.08 | 0.11  | 0.31 | 1.00 | integrin beta 1 (fibronectin receptor beta) [Source:MGJ Symbol:Acc:MGJ:96610]                                      |
| ENSMUSG000000040078  | Gm9769       | 0.75 | 0.00 | 0.00 | -0.33 | 0.07 | 0.64 | -0.19 | 0.49 | 1.00 | predicted pseudogene 9769 [Source:MGJ Symbol:Acc:MGJ:3704271]                                                      |
| ENSMUSG000000003952  | Gm72         | 0.52 | 0.00 | 0.00 | -0.11 | 0.34 | 1.00 | -0.05 | 0.90 | 1.00 | poly (ADP-ribose) polymerase family, member 10 [Source:MGJ Symbol:Acc:MGJ:3712326]                                 |
| ENSMUSG00000001542   | E1f2         | 0.63 | 0.00 | 0.00 | -0.17 | 0.27 | 1.00 | 0.16  | 0.44 | 1.00 | elongation factor RNA polymerase II 2 [Source:MGJ Symbol:Acc:MGJ:2193348]                                          |
| ENSMUSG00000022698   | Naaf50       | 0.47 | 0.00 | 0.00 | -0.31 | 0.01 | 0.09 | 0.25  | 0.08 | 1.00 | N[alpha]-acetyltransferase 50, Na/E catalytic subunit [Source:MGJ Symbol:Acc:MGJ:1919367]                          |
| ENSMUSG000000035342  | Ltst2        | 0.63 | 0.00 | 0.00 | -0.28 | 0.09 | 0.74 | -0.19 | 0.36 | 1.00 | leucine zipper, putative tumor suppressor 2 [Source:MGJ Symbol:Acc:MGJ:2380595]                                    |
| ENSMUSG000000019437  | Ticl1        | 0.34 | 0.00 | 0.00 | -0.08 | 0.28 | 1.00 | 0.03  | 0.28 | 1.00 | TLC domain containing 1 [Source:MGJ Symbol:Acc:MGJ:2444698]                                                        |
| ENSMUSG000000005461  | Kdn2a        | 0.51 | 0.00 | 0.00 | -0.31 | 0.01 | 0.18 | 0.05  | 0.78 | 1.00 | lysine (K)-specific demethylase 2A [Source:MGJ Symbol:Acc:MGJ:1354736]                                             |
| ENSMUSG000000003235  | E1f2b5       | 0.60 | 0.00 | 0.00 | -0.19 | 0.19 | 1.00 | 0.00  | 1.00 | 1.00 | eukaryotic translation initiation factor 2B, subunit 5 epsilon [Source:MGJ Symbol:Acc:MGJ:2446176]                 |
| ENSMUSG0000000034620 | Tmem5        | 0.87 | 0.00 | 0.00 | -0.37 | 0.10 | 0.81 | 0.00  | 1.00 | 1.00 | transmembrane protein 5 [Source:MGJ Symbol:Acc:MGJ:2384919]                                                        |
| ENSMUSG000000028691  | Pdxn1        | 0.27 | 0.00 | 0.00 | -0.08 | 0.10 | 0.84 | -0.02 | 0.84 | 1.00 | peroxiredoxin 1 [Source:MGJ Symbol:Acc:MGJ:39623]                                                                  |
| ENSMUSG000000002321  | Rpl2c        | 0.59 | 0.00 | 0.00 | -0.11 | 0.34 | 1.00 | 0.03  | 0.89 | 1.00 | ribosomal protein L2c [Source:MGJ Symbol:Acc:MGJ:1924238]                                                          |
| ENSMUSG000000083087  | Gm11249      | 0.45 | 0.00 | 0.00 | 0.00  | 1.00 | 1.00 | 0.14  | 0.33 | 1.00 | predicted gene 11249 [Source:MGJ Symbol:Acc:MGJ:3650834]                                                           |
| ENSMUSG000000025794  | Rpl14        | 0.46 | 0.00 | 0.00 | -0.03 | 0.78 | 1.00 | 0.16  | 0.27 | 1.00 | ribosomal protein L14 [Source:MGJ Symbol:Acc:MGJ:1914365]                                                          |
| ENSMUSG000000006905  | Trp          | 0.47 | 0.00 | 0.00 | -0.18 | 0.10 | 0.81 | 0.11  | 0.48 | 1.00 | translocated promoter region [Source:MGJ Symbol:Acc:MGJ:1922066]                                                   |
| ENSMUSG000000025487  | Pemf13       | 0.52 | 0.00 | 0.00 | -0.19 | 0.12 | 0.83 | 0.11  | 0.51 | 1.00 | proteasome (prosome, macropain) 26S subunit, non-ATPase, 13 [Source:MGJ Symbol:Acc:MGJ:1345192]                    |
| ENSMUSG000000001442  | Ctst1        | 1.29 | 0.00 | 0.00 | -0.38 | 0.08 | 0.53 | 0.11  | 0.51 | 1.00 | PDZ and LIM domain protein 1 [Source:MGJ Symbol:Acc:MGJ:1914649]                                                   |
| ENSMUSG000000025613  | Cst8         | 0.39 | 0.00 | 0.00 | -0.18 | 0.05 | 0.53 | 0.11  | 0.37 | 1.00 | chaperonin containing Top1, subunit 8 (theta) [Source:MGJ Symbol:Acc:MGJ:107183]                                   |
| ENSMUSG000000021585  | Cast         | 0.74 | 0.00 | 0.00 | -0.21 | 0.25 | 1.00 | 0.00  | 1.00 | 1.00 | calpastatin [Source:MGJ Symbol:Acc:MGJ:1098238]                                                                    |
| ENSMUSG000000027412  | Lipn3        | 0.96 | 0.00 | 0.00 | -0.45 | 0.05 | 0.52 | -0.13 | 0.82 | 1.00 | lipin 3 [Source:MGJ Symbol:Acc:MGJ:1891342]                                                                        |
| ENSMUSG000000002649  | Cyfl7a       | 0.65 | 0.00 | 0.00 | -0.31 | 0.02 | 0.29 | 0.04  | 0.22 | 1.00 | 1,2-diol dehydratase 2 [Source:MGJ Symbol:Acc:MGJ:1347076]                                                         |
| ENSMUSG000000029147  | Ppm1a        | 0.57 | 0.00 | 0.00 | -0.29 | 0.29 | 0.40 | 0.40  | 0.62 | 1.00 | protein phosphatase 1G (formerly 2C), magnesium-dependent, gamma isoform [Source:MGJ Symbol:Acc:MGJ:1006065]       |
| ENSMUSG0000000035021 | Baz1a        | 1.02 | 0.00 | 0.00 | -0.65 | 0.01 | 0.15 | 0.32  | 0.82 | 1.00 | bromodomain adjacent to zinc finger domain 1A [Source:MGJ Symbol:Acc:MGJ:1309478]                                  |
| ENSMUSG000000042626  | Shc1         | 0.61 | 0.00 | 0.00 | -0.29 | 0.06 | 0.56 | 0.04  | 0.90 | 1.00 | src homology 2 domain-containing transforming protein C1 [Source:MGJ Symbol:Acc:MGJ:98296]                         |
| ENSMUSG00000010765   | Cars1        | 0.92 | 0.00 | 0.00 | -0.41 | 0.06 | 0.61 | -0.01 | 1.00 | 1.00 | cysteine-HRNase domain-containing protein 1 [Source:MGJ Symbol:Acc:MGJ:3704271]                                    |
| ENSMUSG00000007160   | Trp1         | 0.40 | 0.00 | 0.00 | -0.01 | 0.92 | 1.00 | 0.04  | 0.79 | 1.00 | Ubl5 domain protein 1 [Source:MGJ Symbol:Acc:MGJ:288301]                                                           |
| ENSMUSG000000084333  | Gm11599      | 0.50 | 0.00 | 0.00 | 0.00  | 1.00 | 1.00 | 0.16  | 0.33 | 1.00 | predicted gene 11599 [Source:MGJ Symbol:Acc:MGJ:3651840]                                                           |
| ENSMUSG000000027995  | Trp2         | 1.75 | 0.00 | 0.00 | -1.00 | 0.02 | 0.26 | 0.14  | 1.00 | 1.00 | toll-like receptor 2 [Source:MGJ Symbol:Acc:MGJ:1346060]                                                           |
| ENSMUSG000000021835  | Rmp4         | 0.69 | 0.00 | 0.00 | -0.16 | 0.36 | 1.00 | 0.09  | 0.72 | 1.00 | bone morphogenetic protein 4 [Source:MGJ Symbol:Acc:MGJ:88180]                                                     |
| ENSMUSG000000003024  | Trp1         | 0.40 | 0.00 | 0.00 | -0.11 | 0.34 | 1.00 | 0.03  | 0.59 | 1.00 | translation initiation factor 5B [Source:MGJ Symbol:Acc:MGJ:2441772]                                               |
| ENSMUSG000000001415  | Smp5         | 0.49 | 0.00 | 0.00 | -0.20 | 0.10 | 0.82 | 0.04  | 0.86 | 1.00 | Smp-5 homolog, nonsense mediated mRNA decay factor (C. elegans) [Source:MGJ Symbol:Acc:MGJ:2447364]                |
| ENSMUSG0000000085893 | Gm12091      | 0.46 | 0.00 | 0.00 | 0.02  | 0.89 | 1.00 | 0.13  | 0.36 | 1.00 | predicted gene 12091 [Source:MGJ Symbol:Acc:MGJ:3650809]                                                           |
| ENSMUSG000000041889  | Sh4a4        | 1.37 | 0.00 | 0.00 | -0.41 | 0.22 | 1.00 | 0.07  | 1.00 | 1.00 | shia homolog 4 (Xenopus lae                                                                                        |

|                      |              |      |      |      |       |      |      |       |      |      |                                                                                                                                       |
|----------------------|--------------|------|------|------|-------|------|------|-------|------|------|---------------------------------------------------------------------------------------------------------------------------------------|
| ENSMUSG0000024812    | Tjp2         | 0.69 | 0.00 | 0.00 | -0.18 | 0.34 | 1.00 | -0.16 | 0.52 | 1.00 | tight junction protein 2 [Source:MGI Symbol:Acc:MGI:1341872]                                                                          |
| ENSMUSG0000022241    | Tars         | 0.66 | 0.00 | 0.01 | -0.38 | 0.03 | 0.34 | 0.11  | 0.71 | 1.00 | thronyol-RNA synthetase [Source:MGI Symbol:Acc:MGI:106314]                                                                            |
| ENSMUSG0000020415    | Tax1b        | 0.59 | 0.00 | 0.01 | -0.15 | 0.33 | 1.00 | 0.01  | 1.00 | 1.00 | viral simian leukemia virus oncogene homolog B (ras related) [Source:MGI Symbol:Acc:MGI:1927244]                                      |
| ENSMUSG000001672     | Marveld3     | 0.95 | 0.00 | 0.01 | -0.32 | 0.18 | 1.00 | -0.08 | 0.82 | 1.00 | MARVEL (membrane-associated) domain containing 3 [Source:MGI Symbol:Acc:MGI:1920858]                                                  |
| ENSMUSG00000096156   | CTO9632.1    | 0.59 | 0.00 | 0.01 | -0.19 | 0.23 | 1.00 | 0.03  | 1.00 | 1.00 | Uncharacterized protein [Source:UniProtKB/TrEMBL:Acc:J3QNY1]                                                                          |
| ENSMUSG0000020775    | Mp138        | 0.49 | 0.00 | 0.01 | -0.12 | 0.33 | 1.00 | 0.13  | 0.45 | 1.00 | mitochondrial ribosomal protein L38 [Source:MGI Symbol:Acc:MGI:1926289]                                                               |
| ENSMUSG0000027236    | Efr3f1       | 0.52 | 0.00 | 0.01 | -0.32 | 0.02 | 0.23 | 0.16  | 0.34 | 1.00 | eukaryotic translation initiation factor 3, subunit J1 [Source:MGI Symbol:Acc:MGI:1925905]                                            |
| ENSMUSG0000002234    | Tsc22d4      | 2.11 | 0.00 | 0.01 | -0.22 | 0.02 | 0.30 | 0.12  | 0.41 | 1.00 | Rat Rab interacting 1 [Source:MGI Symbol:Acc:MGI:2386659]                                                                             |
| ENSMUSG00000068299   | 1700019G17Rk | 1.07 | 0.00 | 0.01 | -0.33 | 0.22 | 1.00 | -0.34 | 0.41 | 1.00 | RIKEN cDNA 170019G17 gene [Source:MGI Symbol:Acc:MGI:1922791]                                                                         |
| ENSMUSG00000091383   | HistH2al     | 0.89 | 0.00 | 0.01 | -0.38 | 0.11 | 0.85 | -0.05 | 1.00 | 1.00 | histone cluster 1, H2al [Source:MGI Symbol:Acc:MGI:3646023]                                                                           |
| ENSMUSG00000038167   | Plk4hg6      | 1.32 | 0.00 | 0.01 | -0.19 | 0.62 | 1.00 | -0.11 | 1.00 | 1.00 | pleckstrin homolog domain containing, family G (with RhoGEF domain) member 6 [Source:MGI Symbol:Acc:MGI:2682298]                      |
| ENSMUSG0000002461    | Plk4hc3      | 0.75 | 0.00 | 0.01 | -0.11 | 0.01 | 1.00 | 0.18  | 1.00 | 1.00 | adipophilin C-1H [Source:MGI Symbol:Acc:MGI:88055]                                                                                    |
| ENSMUSG00000046866   | Fh1          | 0.66 | 0.00 | 0.01 | -0.31 | 0.08 | 0.70 | 0.04  | 0.94 | 1.00 | fibroblastin [Source:MGI Symbol:Acc:MGI:85468]                                                                                        |
| ENSMUSG00000006611   | Hfe          | 1.25 | 0.00 | 0.01 | -0.16 | 0.63 | 1.00 | -0.22 | 0.74 | 1.00 | hemochromatosis [Source:MGI Symbol:Acc:MGI:109191]                                                                                    |
| ENSMUSG00000022043   | Trim35       | 0.59 | 0.00 | 0.01 | -0.20 | 0.23 | 1.00 | 0.05  | 0.89 | 1.00 | tripartite motif-containing 35 [Source:MGI Symbol:Acc:MGI:1914104]                                                                    |
| ENSMUSG00000064281   | Rpl19-ps1    | 0.62 | 0.00 | 0.01 | -0.08 | 0.66 | 1.00 | 0.05  | 0.83 | 1.00 | ribosomal protein L19, pseudogene 1 [Source:MGI Symbol:Acc:MGI:3642668]                                                               |
| ENSMUSG00000002923   | Tsc22d4      | 2.11 | 0.00 | 0.01 | -0.22 | 0.02 | 0.30 | 0.12  | 0.41 | 1.00 | TSC22 domain family, member 4 [Source:MGI Symbol:Acc:MGI:1926070]                                                                     |
| ENSMUSG00000045211   | Nudt18       | 0.96 | 0.00 | 0.01 | -0.24 | 0.38 | 1.00 | 0.00  | 1.00 | 1.00 | nudix (nucleoside diphosphate linked moiety X)-type motif 18 [Source:MGI Symbol:Acc:MGI:2385853]                                      |
| ENSMUSG00000038615   | Nfe2t1       | 0.37 | 0.00 | 0.01 | -0.21 | 0.03 | 0.36 | -0.01 | 0.97 | 1.00 | nuclear factor, erythroid derived 2-like 1 [Source:MGI Symbol:Acc:MGI:99421]                                                          |
| ENSMUSG00000036336   | Crip2        | 0.65 | 0.00 | 0.01 | -0.41 | 0.02 | 0.27 | -0.10 | 0.65 | 1.00 | cysteine rich protein 2 [Source:MGI Symbol:Acc:MGI:1915587]                                                                           |
| ENSMUSG00000064281   | Rpl19-ps1    | 0.62 | 0.00 | 0.01 | -0.08 | 0.66 | 1.00 | 0.05  | 0.83 | 1.00 | ribosomal protein L19, pseudogene 1 [Source:MGI Symbol:Acc:MGI:3642668]                                                               |
| ENSMUSG00000005576   | Ube2m        | 0.52 | 0.00 | 0.01 | -0.26 | 0.05 | 0.55 | 0.14  | 0.45 | 1.00 | ubiquitin-conjugating enzyme E2M [Source:MGI Symbol:Acc:MGI:108278]                                                                   |
| ENSMUSG00000049881   | 2810025M15Rk | 1.00 | 0.00 | 0.01 | -0.26 | 0.36 | 1.00 | 0.08  | 0.90 | 1.00 | RIKEN cDNA 2810025M15 gene [Source:MGI Symbol:Acc:MGI:1917203]                                                                        |
| ENSMUSG00000078652   | Pama3        | 0.46 | 0.00 | 0.01 | -0.27 | 0.03 | 0.34 | 0.08  | 0.63 | 1.00 | proteasome (prosome, macropain) 28 subunit, 3 [Source:MGI Symbol:Acc:MGI:1096366]                                                     |
| ENSMUSG00000048603   | Tmem136      | 0.93 | 0.00 | 0.01 | -0.15 | 0.59 | 1.00 | -0.20 | 0.56 | 1.00 | transmembrane protein 136 [Source:MGI Symbol:Acc:MGI:2685030]                                                                         |
| ENSMUSG00000002909   | Trp53        | 0.75 | 0.00 | 0.01 | -0.09 | 0.56 | 1.00 | -0.33 | 0.84 | 1.00 | LIM and sesoned cell antigen 1-like domain 2 [Source:MGI Symbol:Acc:MGI:2385057]                                                      |
| ENSMUSG00000061689   | Dlgap4       | 0.72 | 0.00 | 0.01 | -0.38 | 0.05 | 0.49 | 0.15  | 0.1  | 1.00 | Dlg discs, large homolog-associated protein 4 (Drosophila) [Source:MGI Symbol:Acc:MGI:2138865]                                        |
| ENSMUSG00000026276   | Sept2        | 0.44 | 0.00 | 0.01 | -0.21 | 0.06 | 0.61 | 0.13  | 0.37 | 1.00 | sepin 2 [Source:MGI Symbol:Acc:MGI:97298]                                                                                             |
| ENSMUSG00000027999   | Plaz12a      | 0.79 | 0.00 | 0.01 | -0.04 | 0.89 | 1.00 | 0.02  | 1.00 | 1.00 | phospholipase A2, group XIIA [Source:MGI Symbol:Acc:MGI:1913600]                                                                      |
| ENSMUSG00000040686   | Tris2        | 0.75 | 0.00 | 0.01 | -0.29 | 0.14 | 1.00 | -0.02 | 1.00 | 1.00 | intraductal (beta)-like 3 [Source:MGI Symbol:Acc:MGI:2384683]                                                                         |
| ENSMUSG00000040297   | Suco         | 0.56 | 0.00 | 0.01 | -0.10 | 0.51 | 1.00 | 0.16  | 0.42 | 1.00 | SUN domain containing ossification factor [Source:MGI Symbol:Acc:MGI:2138346]                                                         |
| ENSMUSG0000021579    | Lrrc14b      | 1.39 | 0.00 | 0.01 | -0.64 | 0.05 | 0.54 | -0.05 | 1.00 | 1.00 | leucine rich repeat containing 14B [Source:MGI Symbol:Acc:MGI:2145269]                                                                |
| ENSMUSG0000020905    | Usp43        | 1.58 | 0.00 | 0.01 | -0.68 | 0.10 | 0.84 | -0.21 | 0.82 | 1.00 | ubiquitin specific peptidase 43 [Source:MGI Symbol:Acc:MGI:2444541]                                                                   |
| ENSMUSG0000007057    | ALS99850.1   | 0.65 | 0.00 | 0.01 | -0.43 | 0.02 | 0.24 | 0.02  | 1.00 | 1.00 | WD repeat and SOCS box containing 2 [Source:MGI Symbol:Acc:MGI:2144041]                                                               |
| ENSMUSG0000023944    | Trp53        | 0.75 | 0.00 | 0.01 | -0.08 | 0.43 | 1.00 | 0.10  | 0.47 | 1.00 | WD repeat and SOCS box containing 2 [Source:MGI Symbol:Acc:MGI:2144041]                                                               |
| ENSMUSG0000020078    | Vps26a       | 0.47 | 0.00 | 0.01 | -0.20 | 0.10 | 0.83 | 0.00  | 1.00 | 1.00 | vacuolar protein sorting 26 homolog A (yeast) [Source:MGI Symbol:Acc:MGI:1353654]                                                     |
| ENSMUSG00000031875   | Ctmn3        | 1.20 | 0.00 | 0.01 | -0.87 | 0.01 | 0.10 | -0.04 | 1.00 | 1.00 | KCLF-like MARVEL transmembrane domain containing 3 [Source:MGI Symbol:Acc:MGI:2447162]                                                |
| ENSMUSG00000062310   | Slc39a1      | 0.51 | 0.00 | 0.01 | -0.30 | 0.03 | 0.35 | -0.02 | 0.96 | 1.00 | solute carrier family 39 (zinc transporter), member 1 [Source:MGI Symbol:Acc:MGI:1353474]                                             |
| ENSMUSG00000044285   | Gm1821       | 0.19 | 0.00 | 0.01 | -0.06 | 0.18 | 1.00 | 0.01  | 0.94 | 1.00 | predicted gene 1821 [Source:MGI Symbol:Acc:MGI:3037879]                                                                               |
| ENSMUSG00000034256   | Afpap27      | 0.59 | 0.00 | 0.01 | -0.03 | 0.92 | 1.00 | -0.05 | 0.84 | 1.00 | Rho GTPase activating protein 27 [Source:MGI Symbol:Acc:MGI:1916903]                                                                  |
| ENSMUSG00000050779   | PsmB4        | 0.38 | 0.00 | 0.01 | -0.22 | 0.01 | 0.13 | -0.18 | 0.16 | 1.00 | proteasome (prosome, macropain) subunit, beta type 4 [Source:MGI Symbol:Acc:MGI:1098257]                                              |
| ENSMUSG00000078317   | Fba          | 1.02 | 0.00 | 0.01 | -0.19 | 0.50 | 1.00 | -0.10 | 0.90 | 1.00 | factor B-associated gene A [Source:MGI Symbol:Acc:MGI:95474]                                                                          |
| ENSMUSG00000038650   | Rhn1         | 0.40 | 0.00 | 0.01 | -0.15 | 0.15 | 1.00 | -0.07 | 0.63 | 1.00 | ribonucleotidyltransferase inhibitor 1 [Source:MGI Symbol:Acc:MGI:1195456]                                                            |
| ENSMUSG00000002614   | Tris2        | 0.75 | 0.00 | 0.01 | -0.29 | 0.14 | 1.00 | -0.02 | 1.00 | 1.00 | intraductal (beta)-like 3 [Source:MGI Symbol:Acc:MGI:2384683]                                                                         |
| ENSMUSG00000028367   | Tnni         | 0.33 | 0.00 | 0.01 | -0.04 | 0.56 | 1.00 | -0.05 | 0.65 | 1.00 | threonine 1 [Source:MGI Symbol:Acc:MGI:98874]                                                                                         |
| ENSMUSG00000034850   | Tmem127      | 0.44 | 0.00 | 0.01 | -0.16 | 0.16 | 1.00 | -0.01 | 0.97 | 1.00 | transmembrane protein 127 [Source:MGI Symbol:Acc:MGI:1916720]                                                                         |
| ENSMUSG0000003970    | Rpl8         | 0.30 | 0.00 | 0.01 | -0.08 | 0.21 | 1.00 | 0.04  | 0.75 | 1.00 | ribosomal protein L8 [Source:MGI Symbol:Acc:MGI:1350927]                                                                              |
| ENSMUSG0000022852    | Nras         | 0.68 | 0.00 | 0.01 | -0.40 | 0.03 | 0.39 | 0.01  | 1.00 | 1.00 | neuroblastoma ras oncogene [Source:MGI Symbol:Acc:MGI:97376]                                                                          |
| ENSMUSG00000031715   | Smarca5      | 0.56 | 0.00 | 0.01 | -0.35 | 0.02 | 0.27 | 0.14  | 0.44 | 1.00 | SWI/SNF related, matrix associated, actin dependent regulator of chromatin, subfamily A, member 5 [Source:MGI Symbol:Acc:MGI:1935129] |
| ENSMUSG00000006073   | B4galnt1     | 1.12 | 0.00 | 0.01 | -0.44 | 0.11 | 0.86 | -0.15 | 0.89 | 1.00 | beta 1,4-N-acetyl-galactosaminyl transferase 1 [Source:MGI Symbol:Acc:MGI:1342057]                                                    |
| ENSMUSG00000038604   | Fam65a       | 0.55 | 0.00 | 0.01 | -0.37 | 0.01 | 0.18 | -0.16 | 0.38 | 1.00 | family with sequence similarity 65, member A [Source:MGI Symbol:Acc:MGI:1922937]                                                      |
| ENSMUSG00000021190   | Lgmn         | 0.25 | 0.00 | 0.01 | -0.03 | 0.70 | 1.00 | -0.09 | 0.30 | 1.00 | legumain [Source:MGI Symbol:Acc:MGI:1330838]                                                                                          |
| ENSMUSG00000030342   | Tris2        | 0.75 | 0.00 | 0.01 | -0.29 | 0.14 | 1.00 | -0.02 | 1.00 | 1.00 | intraductal (beta)-like 3 [Source:MGI Symbol:Acc:MGI:2384683]                                                                         |
| ENSMUSG00000079263   | Gm6614       | 1.14 | 0.00 | 0.01 | -0.35 | 0.20 | 1.00 | 0.22  | 0.68 | 1.00 | predicted gene 6614 [Source:MGI Symbol:Acc:MGI:3647159]                                                                               |
| ENSMUSG00000017631   | Abr          | 0.53 | 0.00 | 0.01 | -0.27 | 0.07 | 0.62 | 0.08  | 0.69 | 1.00 | active BCR-related gene [Source:MGI Symbol:Acc:MGI:107771]                                                                            |
| ENSMUSG00000027091   | Zc3h15       | 0.49 | 0.00 | 0.01 | -0.29 | 0.03 | 0.38 | 0.13  | 0.46 | 1.00 | zinc finger CCH-type containing 15 [Source:MGI Symbol:Acc:MGI:1919747]                                                                |
| ENSMUSG00000008249   | Rpl19-ps1    | 0.62 | 0.00 | 0.01 | -0.08 | 0.66 | 1.00 | 0.05  | 0.83 | 1.00 | ribosomal protein L19, pseudogene 1 [Source:MGI Symbol:Acc:MGI:3642668]                                                               |
| ENSMUSG00000028010   | Gat1         | 1.20 | 0.00 | 0.01 | -0.74 | 0.02 | 0.24 | 0.08  | 1.00 | 1.00 | GAO1 R1B nucleocapsid protein (yeast) [Source:MGI Symbol:Acc:MGI:1930948]                                                             |
| ENSMUSG00000092609   | Gm20481      | 1.17 | 0.00 | 0.01 | -0.63 | 0.05 | 0.53 | 0.21  | 0.67 | 1.00 | predicted gene 20481 [Source:MGI Symbol:Acc:MGI:5141946]                                                                              |
| ENSMUSG00000031617   | Tmem184c     | 0.75 | 0.00 | 0.01 | -0.08 | 0.69 | 1.00 | 0.13  | 0.66 | 1.00 | transmembrane protein 184c [Source:MGI Symbol:Acc:MGI:2384562]                                                                        |
| ENSMUSG00000031016   | Wee1         | 1.25 | 0.00 | 0.01 | -0.28 | 0.41 | 1.00 | 0.36  | 0.54 | 1.00 | WEE1 - homolog 1 (S. pombe) [Source:MGI Symbol:Acc:MGI:103075]                                                                        |
| ENSMUSG00000002967   | Nras         | 0.68 | 0.00 | 0.01 | -0.40 | 0.03 | 0.39 | 0.01  | 1.00 | 1.00 | neuroblastoma ras oncogene [Source:MGI Symbol:Acc:MGI:97376]                                                                          |
| ENSMUSG00000040525   | Clic         | 0.65 | 0.00 | 0.01 | -0.15 | 0.41 | 1.00 | 0.00  | 1.00 | 1.00 | Casitas B-lineage lymphoma c [Source:MGI Symbol:Acc:MGI:1931457]                                                                      |
| ENSMUSG00000028646   | Rrac         | 0.50 | 0.00 | 0.01 | -0.31 | 0.02 | 0.27 | 0.00  | 1.00 | 1.00 | Ras-related GTP binding C [Source:MGI Symbol:Acc:MGI:1858751]                                                                         |
| ENSMUSG00000006390   | Elovl1       | 0.42 | 0.00 | 0.01 | 0.13  | 0.22 | 1.00 | -0.05 | 0.80 | 1.00 | Elovl elongation of very long chain fatty acids (FEN1/Elo2, SUR4/Elo3, yeast)-like 1 [Source:MGI Symbol:Acc:MGI:1859909]              |
| ENSMUSG00000029186   | Slc42a2      | 1.43 | 0.00 | 0.01 | -0.29 | 0.48 | 1.00 | -0.32 | 0.68 | 1.00 | solute carrier family 34 (sodium phosphate), member 2 [Source:MGI Symbol:Acc:MGI:1342284]                                             |
| ENSMUSG00000004184   | Wdr74        | 0.88 | 0.00 | 0.01 | -0.08 | 0.68 | 0.56 | 0.00  | 0.90 | 1.00 | WD repeat domain 74 [Source:MGI Symbol:Acc:MGI:2147427]                                                                               |
| ENSMUSG00000020248   | Nlyb         | 0.93 | 0.00 | 0.01 | -0.56 | 0.02 | 0.30 | 0.07  | 0.91 | 1.00 | nuclear transcription factor-Y beta [Source:MGI Symbol:Acc:MGI:97317]                                                                 |
| ENSMUSG00000019947   | Ard5b        | 1.00 | 0.00 | 0.01 | -0.29 | 0.30 | 1.00 | 0.15  | 0.71 | 1.00 | AT rich interactive domain 5B (MRF1-like) [Source:MGI Symbol:Acc:MGI:2175912]                                                         |
| ENSMUSG00000042997   | Zfp239       | 1.63 | 0.00 | 0.01 | -0.53 | 0.19 | 1.00 | 0.13  | 1.00 | 1.00 | zinc finger protein 239 [Source:MGI Symbol:Acc:MGI:1306812]                                                                           |
| ENSMUSG00000018126   | Tris2        | 0.75 | 0.00 | 0.01 | -0.29 | 0.14 | 1.00 | -0.02 | 1.00 | 1.00 | intraductal (beta)-like 3 [Source:MGI Symbol:Acc:MGI:2384683]                                                                         |
| ENSMUSG00000044757   | Gm6430       | 0.45 | 0.00 | 0.01 | -0.36 | 0.00 | 0.06 | 0.03  | 0.86 | 1.00 | predicted gene 6430 [Source:MGI Symbol:Acc:MGI:3648857]                                                                               |
| ENSMUSG00000071415   | Rpl23        | 0.30 | 0.00 | 0.01 | -0.04 | 0.58 | 1.00 | 0.03  | 0.77 | 1.00 | ribosomal protein L23 [Source:MGI Symbol:Acc:MGI:1929455]                                                                             |
| ENSMUSG00000079641   | Rpl39        | 0.39 | 0.00 | 0.01 | -0.06 | 0.53 | 1.00 | 0.11  | 0.44 | 1.00 | ribosomal protein L39 [Source:MGI Symbol:Acc:MGI:1914988]                                                                             |
| ENSMUSG00000031078   | Ctn          | 0.36 | 0.00 | 0.01 | -0.28 | 0.01 | 0.12 | -0.02 | 0.90 | 1.00 | catenin [Source:MGI Symbol:Acc:MGI:99695]                                                                                             |
| ENSMUSG00000004184   | Wdr74        | 0.88 | 0.00 | 0.01 | -0.08 | 0.68 | 0.56 | 0.00  | 0.90 | 1.00 | WD repeat domain 74 [Source:MGI Symbol:Acc:MGI:2147427]                                                                               |
| ENSMUSG0000003269    | Cyhd2        | 0.56 | 0.00 | 0.01 | -0.30 | 0.07 | 0.64 | 0.01  | 1.00 | 1.00 | cytohesin 2 [Source:MGI Symbol:Acc:MGI:1334255]                                                                                       |
| ENSMUSG00000040466</ |              |      |      |      |       |      |      |       |      |      |                                                                                                                                       |

|                      |              |      |      |      |       |      |      |       |      |      |                                                                                                                                                                           |
|----------------------|--------------|------|------|------|-------|------|------|-------|------|------|---------------------------------------------------------------------------------------------------------------------------------------------------------------------------|
| ENSMUSG00000016619   | Nup50        | 0.51 | 0.00 | 0.01 | -0.30 | 0.04 | 0.47 | 0.09  | 0.64 | 1.00 | nucleoporin 50 [Source:MGI Symbol:Acc:MGI:1351502]                                                                                                                        |
| ENSMUSG0000001175    | Calm1        | 0.31 | 0.00 | 0.01 | -0.25 | 0.00 | 0.06 | 0.05  | 0.66 | 1.00 | calmodulin 1 [Source:MGI Symbol:Acc:MGI:88251]                                                                                                                            |
| ENSMUSG0000000789    | Wt219.1      | 0.64 | 0.00 | 0.01 | -0.38 | 0.04 | 0.48 | 0.12  | 0.69 | 1.00 | 0                                                                                                                                                                         |
| ENSMUSG00000065041   | SNORA62      | 0.56 | 0.00 | 0.01 | -0.05 | 0.79 | 1.00 | 0.10  | 0.63 | 1.00 | Small nuclear RNA SNORA62/SNORA6 family [Source:RFAM:Acc:RF00091]                                                                                                         |
| ENSMUSG00000030282   | Cmas         | 0.56 | 0.00 | 0.01 | -0.36 | 0.03 | 0.34 | 0.12  | 0.59 | 1.00 | cytidine monophospho-N-acetylneuraminic acid synthetase [Source:MGI Symbol:Acc:MGI:1337124]                                                                               |
| ENSMUSG00000028423   | Ntk1         | 0.49 | 0.00 | 0.01 | -0.16 | 0.24 | 1.00 | 0.07  | 0.71 | 1.00 | nuclear transcription factor, X-box binding 1 [Source:MGI Symbol:Acc:MGI:1921414]                                                                                         |
| ENSMUSG00000035725   | Pfkfb        | 0.82 | 0.00 | 0.01 | -0.42 | 0.08 | 0.71 | -0.03 | 1.00 | 1.00 | protein kinase, X-kinase [Source:MGI Symbol:Acc:MGI:1309999]                                                                                                              |
| ENSMUSG00000029475   | Elf3b        | 0.53 | 0.00 | 0.01 | -0.26 | 0.12 | 0.06 | 0.12  | 0.86 | 1.25 | regulator of transcription factor 1 [Source:MGI Symbol:Acc:MGI:107494]                                                                                                    |
| ENSMUSG00000070319   | Elf3g        | 0.53 | 0.00 | 0.01 | -0.33 | 0.03 | 0.36 | -0.03 | 0.90 | 1.00 | eukaryotic translation initiation factor 3, subunit G [Source:MGI Symbol:Acc:MGI:1858258]                                                                                 |
| ENSMUSG000000081953  | Gm12435      | 0.43 | 0.00 | 0.01 | -0.35 | 0.01 | 0.10 | 0.03  | 0.86 | 1.00 | predicted gene 12435 [Source:MGI Symbol:Acc:MGI:3651950]                                                                                                                  |
| ENSMUSG00000029032   | Ahrgef16     | 0.46 | 0.00 | 0.01 | -0.04 | 0.77 | 1.00 | 0.00  | 0.88 | 1.00 | Rho guanine nucleotide exchange factor (GEF) 16 [Source:MGI Symbol:Acc:MGI:2446219]                                                                                       |
| ENSMUSG00000029039   | Ahrgef16     | 1.11 | 0.00 | 0.01 | -0.16 | 0.01 | 0.16 | -0.08 | 1.00 | 1.00 | family with sequence similarity 57, member A [Source:MGI Symbol:Acc:MGI:2151940]                                                                                          |
| ENSMUSG00000003549   | Erc2         | 1.10 | 0.00 | 0.01 | -0.75 | 0.02 | 0.26 | -0.14 | 0.88 | 1.00 | essential repair deficiency rodent nuclear deficiency, complementation group 1 [Source:MGI Symbol:Acc:MGI:95412]                                                          |
| ENSMUSG000000032003  | Cdv3         | 0.45 | 0.00 | 0.01 | -0.35 | 0.01 | 0.12 | 0.14  | 0.38 | 1.00 | carnitine deficiency-complex gene expressed in ventricle 3 [Source:MGI Symbol:Acc:MGI:2448759]                                                                            |
| ENSMUSG00000024429   | Gnt1         | 0.61 | 0.00 | 0.01 | -0.29 | 0.11 | 0.87 | 0.17  | 0.47 | 1.00 | guanine nucleotide binding protein-like 1 [Source:MGI Symbol:Acc:MGI:95764]                                                                                               |
| ENSMUSG00000022391   | Rangap1      | 0.50 | 0.00 | 0.01 | -0.38 | 0.01 | 0.18 | 0.12  | 0.50 | 1.00 | RAK1 GTPase activating protein 1 [Source:MGI Symbol:Acc:MGI:103071]                                                                                                       |
| ENSMUSG00000020494   | 492138K21Rk  | 2.09 | 0.00 | 0.01 | -0.63 | 0.13 | 0.98 | -0.09 | 1.00 | 1.00 | RIKEN cDNA 492138K21 gene [Source:MGI Symbol:Acc:MGI:1914680]                                                                                                             |
| ENSMUSG00000029888   | Trpv6        | 2.03 | 0.00 | 0.01 | -0.51 | 0.34 | 1.00 | -0.18 | 1.00 | 1.00 | transient receptor potential cation channel, subfamily V, member 6 [Source:MGI Symbol:Acc:MGI:19227250]                                                                   |
| ENSMUSG00000021392   | No8          | 0.80 | 0.00 | 0.01 | -0.53 | 0.02 | 0.29 | 0.03  | 1.00 | 1.00 | nuclear protein 8 [Source:MGI Symbol:Acc:MGI:1918180]                                                                                                                     |
| ENSMUSG00000026434   | Nuckx1       | 0.42 | 0.00 | 0.01 | -0.08 | 0.49 | 1.00 | 0.06  | 0.73 | 1.00 | nuclear casein kinase and cyclin-dependent kinase substrate 1 [Source:MGI Symbol:Acc:MGI:1934811]                                                                         |
| ENSMUSG00000001626   | Rhm25        | 0.28 | 0.00 | 0.01 | -0.08 | 0.45 | 1.00 | 0.08  | 0.57 | 1.00 | RNA binding motif protein 25 [Source:MGI Symbol:Acc:MGI:1914298]                                                                                                          |
| ENSMUSG00000000126   | Wntda        | 2.38 | 0.00 | 0.01 | -1.61 | 0.01 | 0.18 | 0.11  | 1.00 | 1.00 | wingless-type MMTV integration site 9A [Source:MGI Symbol:Acc:MGI:2446084]                                                                                                |
| ENSMUSG00000028288   | Glp3         | 1.30 | 0.00 | 0.01 | -1.01 | 0.01 | 0.13 | -0.04 | 1.00 | 1.00 | guanylate binding protein 3 [Source:MGI Symbol:Acc:MGI:1926263]                                                                                                           |
| ENSMUSG000000075470  | Alg10b       | 0.71 | 0.00 | 0.01 | -0.34 | 0.10 | 0.83 | 0.13  | 0.66 | 1.00 | asparagine-linked glycosylation 10B (alpha-1,2-glucosyltransferase) [Source:MGI Symbol:Acc:MGI:2146169]                                                                   |
| ENSMUSG00000027851   | Ada          | 0.64 | 0.00 | 0.01 | -0.26 | 0.17 | 1.00 | -0.04 | 0.94 | 1.00 | adenosine deaminase, RNA-specific [Source:MGI Symbol:Acc:MGI:1889575]                                                                                                     |
| ENSMUSG00000000687   | 12960        | 0.67 | 0.00 | 0.01 | -0.19 | 0.25 | 1.00 | 0.05  | 1.00 | 1.00 | predicted gene 12960 [Source:MGI Symbol:Acc:MGI:3651525]                                                                                                                  |
| ENSMUSG000000097229  | AC108401.2   | 1.26 | 0.00 | 0.01 | -0.78 | 0.03 | 0.33 | -0.17 | 1.00 | 1.00 | 0                                                                                                                                                                         |
| ENSMUSG000000028741  | Mtna         | 0.87 | 0.00 | 0.01 | -0.37 | 0.16 | 1.00 | 0.10  | 0.82 | 1.00 | MRT4, mRNA turnover 4, homolog (S. cerevisiae) [Source:MGI Symbol:Acc:MGI:1917152]                                                                                        |
| ENSMUSG000000063293  | Pom121       | 0.66 | 0.00 | 0.01 | -0.42 | 0.03 | 0.39 | -0.07 | 0.86 | 1.00 | nuclear pore membrane protein 121 [Source:MGI Symbol:Acc:MGI:2137624]                                                                                                     |
| ENSMUSG000000029475  | Elf3b        | 0.62 | 0.00 | 0.01 | -0.20 | 0.26 | 1.00 | -0.14 | 0.58 | 1.00 | lysine (K)-specific demethylase 28 [Source:MGI Symbol:Acc:MGI:1354737]                                                                                                    |
| ENSMUSG00000073684   | 261002J02Rk  | 0.79 | 0.00 | 0.01 | -0.21 | 0.38 | 1.00 | 0.10  | 0.77 | 1.00 | RIKEN cDNA 261002J02 gene [Source:MGI Symbol:Acc:MGI:1914763]                                                                                                             |
| ENSMUSG000000091021  | Gm17300      | 1.01 | 0.00 | 0.01 | -0.86 | 0.00 | 0.06 | 0.05  | 1.00 | 1.00 | predicted gene, 17300 [Source:MGI Symbol:Acc:MGI:4936934]                                                                                                                 |
| ENSMUSG000000006476  | Nefl         | 0.49 | 0.00 | 0.01 | -0.18 | 0.20 | 1.00 | -0.13 | 0.49 | 1.00 | nasal embryonic LHRH factor [Source:MGI Symbol:Acc:MGI:1861755]                                                                                                           |
| ENSMUSG0000000035726 | Sup116b      | 0.51 | 0.00 | 0.01 | -0.30 | 0.04 | 0.46 | 0.03  | 0.90 | 1.00 | suppressor of Ty 16 homolog (S. cerevisiae) [Source:MGI Symbol:Acc:MGI:1890948]                                                                                           |
| ENSMUSG00000002578   | Gm12941      | 0.52 | 0.00 | 0.01 | -0.09 | 0.60 | 1.00 | 0.01  | 0.93 | 1.00 | predicted gene 12941 [Source:MGI Symbol:Acc:MGI:3651048]                                                                                                                  |
| ENSMUSG000000066538  | Gm6254       | 0.56 | 0.00 | 0.01 | -0.18 | 0.29 | 1.00 | 0.01  | 1.00 | 1.00 | predicted gene 6254 [Source:MGI Symbol:Acc:MGI:3648838]                                                                                                                   |
| ENSMUSG000000049404  | Gm12689      | 1.08 | 0.00 | 0.01 | -0.08 | 0.85 | 1.00 | 0.14  | 0.78 | 1.00 | predicted gene 12689 [Source:MGI Symbol:Acc:MGI:3651683]                                                                                                                  |
| ENSMUSG000000025362  | Rps26        | 0.39 | 0.00 | 0.01 | -0.08 | 0.44 | 1.00 | 0.06  | 0.73 | 1.00 | ribosomal protein S26 [Source:MGI Symbol:Acc:MGI:1351628]                                                                                                                 |
| ENSMUSG00000015966   | H17fb        | 0.92 | 0.00 | 0.01 | -0.21 | 0.39 | 1.00 | 0.03  | 1.00 | 1.00 | interleukin 17 receptor B [Source:MGI Symbol:Acc:MGI:1355252]                                                                                                             |
| ENSMUSG00000028124   | Gdm          | 0.23 | 0.00 | 0.01 | -0.02 | 0.96 | 1.00 | 0.23  | 0.01 | 1.00 | glutamate-cysteine ligase, modifier subunit [Source:MGI Symbol:Acc:MGI:1040955]                                                                                           |
| ENSMUSG000000032562  | Gna2         | 0.33 | 0.00 | 0.01 | -0.05 | 0.59 | 1.00 | 0.05  | 0.69 | 1.00 | guanine nucleotide binding protein (G protein), alpha inhibiting 2 [Source:MGI Symbol:Acc:MGI:95772]                                                                      |
| ENSMUSG000000025745  | Hadha        | 0.32 | 0.00 | 0.01 | -0.07 | 0.37 | 1.00 | 0.02  | 0.90 | 1.00 | hydroxyacyl-Coenzyme A dehydrogenase/3-ketoacyl-Coenzyme A thiolase/enoyl-Coenzyme A hydratase (trifunctional protein), alpha subunit [Source:MGI Symbol:Acc:MGI:2135593] |
| ENSMUSG000000037149  | Ddx1         | 0.39 | 0.00 | 0.01 | -0.14 | 0.23 | 1.00 | 0.02  | 0.90 | 1.00 | DEAD (Asp-Glu-Ala-Asp) box polypeptide 1 [Source:MGI Symbol:Acc:MGI:2144727]                                                                                              |
| ENSMUSG00000000185   | Rps14        | 0.53 | 0.00 | 0.01 | -0.02 | 0.88 | 1.00 | 0.04  | 0.87 | 1.00 | TRAM1 homolog 1 homolog (S. cerevisiae) [Source:MGI Symbol:Acc:MGI:1289155]                                                                                               |
| ENSMUSG000000022898  | Rod1         | 0.66 | 0.00 | 0.01 | -0.29 | 0.14 | 1.00 | 0.06  | 0.90 | 1.00 | Down syndrome critical region gene 3 [Source:MGI Symbol:Acc:MGI:1206040]                                                                                                  |
| ENSMUSG000000028382  | Rod1         | 0.41 | 0.00 | 0.01 | -0.09 | 0.42 | 1.00 | 0.02  | 0.93 | 1.00 | ROD1 regulator of differentiation 1 (S. pombe) [Source:MGI Symbol:Acc:MGI:1923334]                                                                                        |
| ENSMUSG000000028919  | Ahrgef19     | 0.74 | 0.00 | 0.01 | -0.38 | 0.05 | 0.50 | 0.19  | 0.52 | 1.00 | Rho guanine nucleotide exchange factor (GEF) 19 [Source:MGI Symbol:Acc:MGI:1925912]                                                                                       |
| ENSMUSG00000002895   | Scm11        | 0.64 | 0.00 | 0.01 | -0.28 | 0.20 | 1.00 | 0.02  | 1.00 | 1.00 | scab-inhibiting protein 1 [Source:MGI Symbol:Acc:MGI:1322762]                                                                                                             |
| ENSMUSG00000005866   | Trnp2        | 0.98 | 0.00 | 0.02 | -0.61 | 0.03 | 0.36 | -0.07 | 0.90 | 1.00 | TNFAIP3 interacting protein 2 [Source:MGI Symbol:Acc:MGI:2388643]                                                                                                         |
| ENSMUSG000000020592  | Sdc1         | 0.95 | 0.00 | 0.02 | -0.13 | 0.73 | 1.00 | -0.10 | 1.00 | 1.00 | syndecan 1 [Source:MGI Symbol:Acc:MGI:1349162]                                                                                                                            |
| ENSMUSG00000026188   | Tmem167      | 0.80 | 0.00 | 0.02 | -0.06 | 0.77 | 1.00 | 0.31  | 0.32 | 1.00 | transmembrane protein 169 [Source:MGI Symbol:Acc:MGI:2442781]                                                                                                             |
| ENSMUSG000000051232  | Tmem169      | 0.79 | 0.00 | 0.02 | -0.47 | 0.05 | 0.51 | -0.04 | 1.00 | 1.00 | transmembrane protein 169 [Source:MGI Symbol:Acc:MGI:2144113]                                                                                                             |
| ENSMUSG00000000007   | 12960        | 0.67 | 0.00 | 0.01 | -0.02 | 0.32 | 1.00 | 0.03  | 0.93 | 1.00 | predicted gene 12960 [Source:MGI Symbol:Acc:MGI:1917939]                                                                                                                  |
| ENSMUSG000000043963  | 2900502L18Rk | 1.17 | 0.00 | 0.02 | -0.22 | 0.54 | 1.00 | -0.46 | 0.49 | 1.00 | RIKEN cDNA 2900502L18 gene [Source:MGI Symbol:Acc:MGI:1924085]                                                                                                            |
| ENSMUSG000000054598  | 913020L23Rk  | 3.21 | 0.00 | 0.02 | -0.11 | 1.00 | 1.00 | 0.13  | 1.00 | 1.00 | RIKEN cDNA 913020L23 gene [Source:MGI Symbol:Acc:MGI:3041166]                                                                                                             |
| ENSMUSG000000071041  | Gm15210      | 0.94 | 0.00 | 0.02 | -0.62 | 0.03 | 0.35 | -0.11 | 0.90 | 1.00 | predicted gene 15210 [Source:MGI Symbol:Acc:MGI:3705743]                                                                                                                  |
| ENSMUSG00000002895   | Scm11        | 0.64 | 0.00 | 0.01 | -0.28 | 0.20 | 1.00 | -0.15 | 0.93 | 1.00 | scab-inhibiting protein 1 [Source:MGI Symbol:Acc:MGI:1914648]                                                                                                             |
| ENSMUSG000000022889  | Gn2          | 0.57 | 0.00 | 0.02 | -0.50 | 0.00 | 0.07 | 0.02  | 0.94 | 1.00 | guanine nucleotide binding protein-like 2 (nucleolar) [Source:MGI Symbol:Acc:MGI:2385207]                                                                                 |
| ENSMUSG00000019087   | Atp6ap1      | 0.30 | 0.00 | 0.02 | -0.18 | 0.03 | 0.37 | 0.00  | 0.98 | 1.00 | ATPase, H <sup>+</sup> transporting, lysosomal accessory protein 1 [Source:MGI Symbol:Acc:MGI:109629]                                                                     |
| ENSMUSG000000061787  | Rps17        | 0.29 | 0.00 | 0.02 | -0.03 | 0.67 | 1.00 | 0.00  | 1.00 | 1.00 | ribosomal protein S17 [Source:MGI Symbol:Acc:MGI:1309526]                                                                                                                 |
| ENSMUSG00000010047   | Hya2         | 0.49 | 0.00 | 0.02 | -0.13 | 0.35 | 1.00 | -0.16 | 0.39 | 1.00 | hyaluronoglucosaminidase 2 [Source:MGI Symbol:Acc:MGI:1196334]                                                                                                            |
| ENSMUSG00000000185   | Rps14        | 0.53 | 0.00 | 0.01 | -0.02 | 0.88 | 1.00 | 0.07  | 0.87 | 1.00 | ribosomal protein S14 [Source:MGI Symbol:Acc:MGI:1917801]                                                                                                                 |
| ENSMUSG000000008683  | Rps15a       | 0.32 | 0.00 | 0.02 | -0.11 | 0.25 | 1.00 | 0.01  | 0.98 | 1.00 | ribosomal protein S15A [Source:MGI Symbol:Acc:MGI:2390991]                                                                                                                |
| ENSMUSG00000021959   | Lals2        | 0.56 | 0.00 | 0.02 | -0.22 | 0.18 | 1.00 | 0.15  | 0.45 | 1.00 | large tumor suppressor 2 [Source:MGI Symbol:Acc:MGI:1354386]                                                                                                              |
| ENSMUSG000000063785  | Utp14a       | 0.94 | 0.00 | 0.02 | -0.61 | 0.03 | 0.38 | -0.03 | 1.00 | 1.00 | UTP14, U3 small nuclear ribonucleoprotein, homolog A (yeast) [Source:MGI Symbol:Acc:MGI:1919804]                                                                          |
| ENSMUSG000000025880  | Smad7        | 0.72 | 0.00 | 0.02 | -0.39 | 0.06 | 0.59 | -0.03 | 0.92 | 1.00 | SMAD family member 7 [Source:MGI Symbol:Acc:MGI:1100518]                                                                                                                  |
| ENSMUSG0000000185    | Rps17        | 0.53 | 0.00 | 0.01 | -0.02 | 0.88 | 1.00 | 0.07  | 0.93 | 1.00 | ribosomal protein S17 [Source:MGI Symbol:Acc:MGI:1330694]                                                                                                                 |
| ENSMUSG000000024603  | Dncx1        | 0.53 | 0.00 | 0.02 | -0.13 | 0.44 | 1.00 | 0.11  | 0.60 | 1.00 | dynactin 4 [Source:MGI Symbol:Acc:MGI:1914915]                                                                                                                            |
| ENSMUSG000000002289  | Angp4        | 0.59 | 0.00 | 0.02 | -0.35 | 0.04 | 0.48 | -0.57 | 0.02 | 1.00 | angiotensin-like 4 [Source:MGI Symbol:Acc:MGI:1888999]                                                                                                                    |
| ENSMUSG000000038683  | PaK1ip1      | 0.54 | 0.00 | 0.02 | -0.27 | 0.09 | 0.77 | 0.00  | 1.00 | 1.00 | PAK1 interacting protein 1 [Source:MGI Symbol:Acc:MGI:1915333]                                                                                                            |
| ENSMUSG000000030499  | 10006EORk    | 0.54 | 0.00 | 0.02 | -0.17 | 0.47 | 1.00 | 0.16  | 0.70 | 1.00 | RIKEN cDNA 110006E09 gene [Source:MGI Symbol:Acc:MGI:1915251]                                                                                                             |
| ENSMUSG00000000282   | Mtg          | 0.64 | 0.00 | 0.02 | -0.43 | 0.03 | 0.33 | -0.29 | 0.27 | 1.00 | max binding protein [Source:MGI Symbol:Acc:MGI:1091050]                                                                                                                   |
| ENSMUSG000000030499  | Kctd15       | 0.89 | 0.00 | 0.02 | -0.63 | 0.02 | 0.30 | -0.17 | 0.71 | 1.00 | potassium channel tetramerisation domain containing 15 [Source:MGI Symbol:Acc:MGI:2385276]                                                                                |
| ENSMUSG00000013275   | Slc41a1      | 0.68 | 0.00 | 0.02 | -0.23 | 0.28 | 1.00 | 0.31  | 1.00 | 1.00 | solute carrier family 41, member 1 [Source:MGI Symbol:Acc:MGI:2444823]                                                                                                    |
| ENSMUSG000000035640  | Smad7        | 1.01 | 0.00 | 0.02 | -0.57 | 0.06 | 0.61 | -0.06 | 0.90 | 1.00 | downstream of Smk1 [Source:MGI Symbol:Acc:MGI:1354170]                                                                                                                    |
| ENSMUSG0000000037235 | Mxd4         | 0.40 | 0.00 | 0.02 | -0.26 | 0.02 | 0.51 | -0.03 | 0.87 | 1.00 | proteasome (prosome, macropain) subunit, alpha type 1 [Source:MGI Symbol:Acc:MGI:1347005]                                                                                 |
| ENSMUSG000000020287  | Mpg          | 0.74 | 0.00 | 0.02 | -0.30 | 0.19 | 1.00 |       |      |      |                                                                                                                                                                           |

|                    |              |      |      |      |       |      |      |       |      |      |                                                                                                                                  |
|--------------------|--------------|------|------|------|-------|------|------|-------|------|------|----------------------------------------------------------------------------------------------------------------------------------|
| ENSMUSG0000024640  | Past1        | 0.82 | 0.00 | 0.03 | 0.22  | 0.36 | 1.00 | -0.21 | 0.64 | 1.00 | phosphoserine aminotransferase 1 [Source:MGI Symbol:Acc:MGI:2183441]                                                             |
| ENSMUSG0000029106  | Add1         | 0.31 | 0.00 | 0.03 | -0.08 | 0.43 | 1.00 | 0.01  | 0.95 | 1.00 | adducin 1 (alpha) [Source:MGI Symbol:Acc:MGI:87918]                                                                              |
| ENSMUSG0000028949  | Arpm3        | 0.45 | 0.00 | 0.03 | -0.17 | 0.24 | 1.00 | -0.06 | 0.74 | 1.00 | secretory carrier membrane protein 3 [Source:MGI Symbol:Acc:MGI:1346346]                                                         |
| ENSMUSG0000023904  | Hcd1f1       | 0.49 | 0.00 | 0.03 | -0.05 | 0.77 | 1.00 | 0.04  | 0.85 | 1.00 | host cell factor C1 regulator 1 (XPO1-dependent) [Source:MGI Symbol:Acc:MGI:2663619]                                             |
| ENSMUSG0000025220  | Mgea5        | 0.35 | 0.00 | 0.03 | 0.01  | 0.95 | 1.00 | 0.11  | 0.41 | 1.00 | meningioma expressed antigen 5 (hyaluronidase) [Source:MGI Symbol:Acc:MGI:1932139]                                               |
| ENSMUSG0000039879  | Heca         | 0.62 | 0.00 | 0.03 | -0.38 | 0.66 | 0.56 | 0.03  | 1.00 | 1.00 | headcase homolog (Drosophila) [Source:MGI Symbol:Acc:MGI:2685715]                                                                |
| ENSMUSG0000002881  | Nab1         | 0.51 | 0.00 | 0.03 | -0.19 | 0.27 | 1.00 | 0.06  | 0.79 | 1.00 | Ngl-A binding protein 1 [Source:MGI Symbol:Acc:MGI:107564]                                                                       |
| ENSMUSG0000000000  | 0000000000   | 0.00 | 0.00 | 0.03 | -0.02 | 0.05 | 0.48 | -0.00 | 0.98 | 1.00 | phosphatidylinositol 3-kinase-related kinase 3 [Source:MGI Symbol:Acc:MGI:1919160]                                               |
| ENSMUSG0000078706  | Gm633        | 0.68 | 0.00 | 0.03 | -0.25 | 0.26 | 1.00 | -0.23 | 0.44 | 1.00 | predicted gene 53 [Source:MGI Symbol:Acc:MGI:2684899]                                                                            |
| ENSMUSG0000020460  | Ros27a       | 0.27 | 0.00 | 0.03 | -0.04 | 0.62 | 1.00 | 0.06  | 0.58 | 1.00 | ribosomal protein S27a [Source:MGI Symbol:Acc:MGI:1925544]                                                                       |
| ENSMUSG0000008524  | Srhg3        | 0.97 | 0.00 | 0.03 | -0.84 | 0.01 | 0.14 | -0.06 | 1.00 | 1.00 | small nuclear RNA host gene (non-protein coding) 3 [Source:MGI Symbol:Acc:MGI:2684817]                                           |
| ENSMUSG0000015714  | Rpdc1b       | 0.00 | 0.03 | 0.03 | -0.43 | 0.36 | 1.00 | -0.05 | 0.75 | 1.00 | phosphoric acid phosphatase type 2 domain containing 18 [Source:MGI Symbol:Acc:MGI:1919160]                                      |
| ENSMUSG0000003441  | Crb3a3       | 3.03 | 0.00 | 0.03 | -0.94 | 1.17 | 1.00 | -0.70 | 1.00 | 1.00 | cAMP responsive element binding protein 3 like 3 [Source:MGI Symbol:Acc:MGI:2384786]                                             |
| ENSMUSG00000043716 | Rpl7         | 0.21 | 0.00 | 0.03 | -0.01 | 0.89 | 1.00 | -0.02 | 0.87 | 1.00 | ribosomal protein L7 [Source:MGI Symbol:Acc:MGI:98073]                                                                           |
| ENSMUSG0000020782  | Lig2         | 0.37 | 0.00 | 0.03 | 0.13  | 0.24 | 1.00 | -0.24 | 0.13 | 1.00 | lethal giant larvae homolog 2 (Drosophila) [Source:MGI Symbol:Acc:MGI:1918843]                                                   |
| ENSMUSG0000003079  | Ccm2         | 0.80 | 0.00 | 0.03 | -0.39 | 0.13 | 0.96 | 0.02  | 1.00 | 1.00 | central cavernous malformation 2 [Source:MGI Symbol:Acc:MGI:2384924]                                                             |
| ENSMUSG0000002084  | Xpr2         | 0.28 | 0.00 | 0.03 | -0.10 | 0.35 | 1.00 | 0.16  | 0.29 | 1.00 | X-box binding protein 1 [Source:MGI Symbol:Acc:MGI:98970]                                                                        |
| ENSMUSG0000024587  | Nars         | 0.36 | 0.00 | 0.03 | -0.23 | 0.04 | 0.46 | 0.02  | 0.94 | 1.00 | asparaginyl-tRNA synthetase [Source:MGI Symbol:Acc:MGI:1917473]                                                                  |
| ENSMUSG0000027637  | 1110008F13Rk | 0.37 | 0.00 | 0.03 | -0.13 | 0.27 | 1.00 | 0.02  | 0.90 | 1.00 | RIKEN cDNA 1110008F13 gene [Source:MGI Symbol:Acc:MGI:1914638]                                                                   |
| ENSMUSG0000028451  | 170002211Rk  | 0.40 | 0.00 | 0.03 | -0.26 | 0.04 | 0.44 | 0.06  | 0.72 | 1.00 | RIKEN cDNA 170002211 gene [Source:MGI Symbol:Acc:MGI:1914567]                                                                    |
| ENSMUSG0000020825  | Gm7969       | 0.47 | 0.00 | 0.03 | 0.06  | 0.68 | 1.00 | 0.18  | 0.92 | 1.00 | predicted gene 7869 [Source:MGI Symbol:Acc:MGI:3644843]                                                                          |
| ENSMUSG0000002343  | Arms6        | 1.01 | 0.00 | 0.03 | -0.39 | 0.23 | 1.00 | 0.03  | 1.00 | 1.00 | armadillo repeat containing 6 [Source:MGI Symbol:Acc:MGI:1924063]                                                                |
| ENSMUSG0000002506  | Zfp217       | 0.74 | 0.00 | 0.03 | -0.42 | 0.07 | 0.67 | 0.13  | 0.69 | 1.00 | zinc finger protein 217 [Source:MGI Symbol:Acc:MGI:2685406]                                                                      |
| ENSMUSG0000003585  | Sec14i2      | 1.49 | 0.00 | 0.03 | -0.39 | 0.37 | 1.00 | 0.07  | 1.00 | 1.00 | SEC14-like 2 (S. cerevisiae) [Source:MGI Symbol:Acc:MGI:1915065]                                                                 |
| ENSMUSG00000096403 | AC162391.1   | 0.58 | 0.00 | 0.03 | -0.43 | 0.02 | 0.30 | -0.08 | 0.75 | 1.00 | Uncharacterized protein [Source:UniProtKB/TrEMBL:Acc:J30K25]                                                                     |
| ENSMUSG0000000000  | 0000000000   | 0.00 | 0.00 | 0.03 | -0.06 | 0.66 | 1.00 | 0.01  | 0.92 | 1.00 | predicted gene 10376 [Source:MGI Symbol:Acc:MGI:3704451]                                                                         |
| ENSMUSG00000040945 | Rcc2         | 0.57 | 0.00 | 0.03 | -0.42 | 0.02 | 0.30 | 0.02  | 1.00 | 1.00 | regulator of chromosome condensation 2 [Source:MGI Symbol:Acc:MGI:1919784]                                                       |
| ENSMUSG00000032366 | Tpm1         | 0.40 | 0.00 | 0.03 | -0.28 | 0.03 | 0.34 | 0.11  | 0.50 | 1.00 | tropomyosin 1, alpha [Source:MGI Symbol:Acc:MGI:98809]                                                                           |
| ENSMUSG0000025470  | Zfp511       | 0.95 | 0.00 | 0.03 | -0.22 | 0.45 | 1.00 | -0.08 | 0.89 | 1.00 | zinc finger protein 511 [Source:MGI Symbol:Acc:MGI:1917002]                                                                      |
| ENSMUSG00000026343 | Nas2         | 0.78 | 0.00 | 0.03 | -0.35 | 0.16 | 1.00 | -0.01 | 1.00 | 1.00 | N-myristyltransferase 2 [Source:MGI Symbol:Acc:MGI:1922386]                                                                      |
| ENSMUSG0000029110  | Rn4          | 0.44 | 0.00 | 0.03 | -0.29 | 0.04 | 0.43 | 0.07  | 0.72 | 1.00 | ring finger protein 4 [Source:MGI Symbol:Acc:MGI:1201691]                                                                        |
| ENSMUSG00000081434 | Gm14165      | 0.62 | 0.00 | 0.03 | -0.11 | 0.57 | 1.00 | 0.02  | 1.00 | 1.00 | predicted gene 14165 [Source:MGI Symbol:Acc:MGI:3650537]                                                                         |
| ENSMUSG00000037938 | Chcd53       | 0.90 | 0.00 | 0.03 | -0.17 | 0.59 | 1.00 | -0.04 | 1.00 | 1.00 | coiled-coil-helix-coiled-coil-helix domain containing 5 [Source:MGI Symbol:Acc:MGI:1913420]                                      |
| ENSMUSG00000032009 | Sees3        | 1.23 | 0.00 | 0.03 | -0.27 | 0.56 | 1.00 | 0.08  | 1.00 | 1.00 | sestrin 3 [Source:MGI Symbol:Acc:MGI:1922979]                                                                                    |
| ENSMUSG0000001857  | Kabap        | 0.26 | 0.00 | 0.03 | 0.06  | 0.66 | 1.00 | 0.01  | 0.95 | 1.00 | gamma-aminobutyric acid receptor-associated protein [Source:MGI Symbol:Acc:MGI:1861742]                                          |
| ENSMUSG0000024712  | Rikar        | 0.33 | 0.00 | 0.03 | -0.01 | 0.97 | 1.00 | 0.08  | 0.57 | 1.00 | riboflavin kinase [Source:MGI Symbol:Acc:MGI:1914688]                                                                            |
| ENSMUSG00000041815 | Poldip3      | 0.48 | 0.00 | 0.03 | -0.38 | 0.01 | 0.20 | -0.05 | 0.85 | 1.00 | polymerase (DNA-directed), delta interacting protein 3 [Source:MGI Symbol:Acc:MGI:1921076]                                       |
| ENSMUSG00000063467 | Rps15        | 0.29 | 0.00 | 0.03 | -0.03 | 0.66 | 1.00 | 0.01  | 0.98 | 1.00 | ribosomal protein S15 [Source:MGI Symbol:Acc:MGI:98117]                                                                          |
| ENSMUSG00000019261 | Mhafs1       | 0.87 | 0.00 | 0.03 | -0.56 | 0.05 | 0.52 | -0.11 | 0.90 | 1.00 | microtubule-associated protein 15 [Source:MGI Symbol:Acc:MGI:2443304]                                                            |
| ENSMUSG00000009558 | Rrmt1        | 0.72 | 0.00 | 0.03 | -0.52 | 0.02 | 0.30 | 0.04  | 0.97 | 1.00 | RNA (guanine-7) methyltransferase [Source:MGI Symbol:Acc:MGI:1915147]                                                            |
| ENSMUSG00000074227 | Spinr2       | 0.30 | 0.00 | 0.03 | -0.03 | 0.76 | 1.00 | -0.03 | 0.85 | 1.00 | serine protease inhibitor, Kunitz type 2 [Source:MGI Symbol:Acc:MGI:1338031]                                                     |
| ENSMUSG00000026981 | Hlfm         | 3.87 | 0.00 | 0.03 | -2.35 | 0.07 | 0.62 | 0.25  | 1.00 | 1.00 | interleukin 1 receptor antagonist [Source:MGI Symbol:Acc:MGI:96547]                                                              |
| ENSMUSG0000003545  | Fosb         | 3.87 | 0.00 | 0.03 | -2.25 | 0.07 | 0.62 | 0.35  | 1.00 | 1.00 | FBJ osteosarcoma oncogene B [Source:MGI Symbol:Acc:MGI:96575]                                                                    |
| ENSMUSG0000000000  | 0000000000   | 0.00 | 0.00 | 0.03 | -0.32 | 0.24 | 0.49 | -0.02 | 0.74 | 1.00 | oxfolin enhancer binding factor 2 [Source:MGI Symbol:Acc:MGI:1915031]                                                            |
| ENSMUSG00000028862 | Map3k6       | 1.67 | 0.00 | 0.03 | -0.49 | 0.31 | 1.00 | -0.21 | 1.00 | 1.00 | mitogen-activated protein kinase kinase kinase 6 [Source:MGI Symbol:Acc:MGI:1855691]                                             |
| ENSMUSG00000015312 | Gadd45b      | 1.52 | 0.00 | 0.03 | -0.75 | 1.00 | 0.80 | -0.19 | 0.39 | 1.00 | growth arrest and DNA-damage-inducible 45 beta [Source:MGI Symbol:Acc:MGI:107776]                                                |
| ENSMUSG00000095466 | Phk2b        | 0.40 | 0.00 | 0.03 | 0.12  | 0.33 | 1.00 | -0.15 | 1.00 | 1.00 | PTK2 protein tyrosine kinase 2 beta [Source:MGI Symbol:Acc:MGI:104908]                                                           |
| ENSMUSG00000094234 | ACT159155.1  | 0.46 | 0.00 | 0.03 | 0.06  | 0.68 | 1.00 | 0.18  | 0.33 | 1.00 | 0.00                                                                                                                             |
| ENSMUSG00000036336 | Clnr1        | 0.45 | 0.00 | 0.03 | -0.38 | 0.01 | 0.15 | -0.10 | 0.61 | 1.00 | chloride channel 7 [Source:MGI Symbol:Acc:MGI:1347048]                                                                           |
| ENSMUSG00000034297 | Medf13       | 0.40 | 0.00 | 0.03 | -0.25 | 0.05 | 0.51 | 0.42  | 0.01 | 1.00 | mediator complex subunit 13 [Source:MGI Symbol:Acc:MGI:3029632]                                                                  |
| ENSMUSG00000019487 | Tripp10      | 0.62 | 0.00 | 0.03 | -0.21 | 0.31 | 1.00 | 0.10  | 0.73 | 1.00 | thyroid hormone receptor interactor 10 [Source:MGI Symbol:Acc:MGI:2146901]                                                       |
| ENSMUSG00000039501 | Zhrf1        | 0.41 | 0.00 | 0.03 | -0.22 | 0.10 | 0.83 | 0.02  | 0.96 | 1.00 | zinc finger, NFX1-type containing 1 [Source:MGI Symbol:Acc:MGI:2138982]                                                          |
| ENSMUSG0000000000  | 0000000000   | 0.00 | 0.00 | 0.03 | -0.42 | 0.15 | 1.00 | 0.04  | 0.90 | 1.00 | coiled-coil factor 1 [Source:MGI Symbol:Acc:MGI:1919101]                                                                         |
| ENSMUSG0000003406  | Tmed5        | 0.60 | 0.00 | 0.03 | -0.32 | 1.00 | 0.83 | 0.11  | 0.69 | 1.00 | transmembrane emp24 protein transport domain containing 5 [Source:MGI Symbol:Acc:MGI:1921586]                                    |
| ENSMUSG00000044783 | Hjup         | 0.54 | 0.00 | 0.03 | -0.33 | 0.06 | 0.60 | -0.23 | 0.35 | 1.00 | Holliday junction recognition protein [Source:MGI Symbol:Acc:MGI:2685821]                                                        |
| ENSMUSG00000019979 | Apd1         | 0.91 | 0.00 | 0.03 | -0.28 | 0.32 | 1.00 | 0.22  | 0.62 | 1.00 | apoptotic peptidase activating factor 1 [Source:MGI Symbol:Acc:MGI:1306796]                                                      |
| ENSMUSG0000000000  | 0000000000   | 0.00 | 0.00 | 0.03 | -0.06 | 0.44 | 1.00 | -0.03 | 0.71 | 1.00 | CD2 antigen (cytoplasmic tail) binding factor 2 [Source:MGI Symbol:Acc:MGI:102611]                                               |
| ENSMUSG00000017999 | Ddnq7        | 0.57 | 0.00 | 0.03 | -0.37 | 0.05 | 0.54 | 0.01  | 1.00 | 1.00 | DEAD (Asp-Glu-Ala-Asp) box polypeptide 27 [Source:MGI Symbol:Acc:MGI:2385884]                                                    |
| ENSMUSG0000026922  | Agpat2       | 0.62 | 0.00 | 0.03 | -0.01 | 1.00 | 1.00 | 0.04  | 0.93 | 1.00 | 1-acylglycerol-3-phosphate O-acyltransferase 2 (lysophosphatidic acid acyltransferase, beta) [Source:MGI Symbol:Acc:MGI:1914762] |
| ENSMUSG00000044573 | Acpl1        | 0.47 | 0.00 | 0.03 | -0.12 | 0.44 | 1.00 | 0.14  | 0.45 | 1.00 | acid phosphatase 1, soluble [Source:MGI Symbol:Acc:MGI:87881]                                                                    |
| ENSMUSG00000048946 | Tcd2         | 0.48 | 0.00 | 0.03 | -0.21 | 0.17 | 1.00 | -0.18 | 0.94 | 1.00 | transducer of ERBB2, 2 [Source:MGI Symbol:Acc:MGI:1888525]                                                                       |
| ENSMUSG0000000000  | 0000000000   | 0.00 | 0.00 | 0.03 | -0.06 | 0.59 | 1.00 | 0.01  | 0.95 | 1.00 | transmembrane ATAD2-interacting protein 1 (bestatinin, homolog 1) [Source:MGI Symbol:Acc:MGI:1926379]                            |
| ENSMUSG00000009681 | Rps19-ps1    | 0.55 | 0.00 | 0.03 | -0.04 | 0.86 | 1.00 | -0.02 | 0.40 | 1.00 | ribosomal protein S19, pseudogene 1 [Source:MGI Symbol:Acc:MGI:3782508]                                                          |
| ENSMUSG00000094974 | Rps19-ps2    | 0.55 | 0.00 | 0.03 | -0.04 | 0.86 | 1.00 | -0.02 | 0.94 | 1.00 | ribosomal protein S19, pseudogene 2 [Source:MGI Symbol:Acc:MGI:3647073]                                                          |
| ENSMUSG00000005732 | Ranbp1       | 0.60 | 0.00 | 0.03 | -0.46 | 0.02 | 0.30 | 0.06  | 0.87 | 1.00 | RAN binding protein 1 [Source:MGI Symbol:Acc:MGI:96269]                                                                          |
| ENSMUSG00000074802 | Casr23       | 0.66 | 0.00 | 0.03 | -0.39 | 0.07 | 0.62 | 0.22  | 0.44 | 1.00 | growth arrest-specific 2 like 3 [Source:MGI Symbol:Acc:MGI:1918780]                                                              |
| ENSMUSG0000000000  | 0000000000   | 0.00 | 0.00 | 0.03 | -0.24 | 0.23 | 0.01 | -0.07 | 0.72 | 1.00 | DEAD (Asp-Glu-Ala-Asp) box polypeptide 19b [Source:MGI Symbol:Acc:MGI:2148251]                                                   |
| ENSMUSG00000042502 | Cd2bp2       | 0.47 | 0.00 | 0.03 | -0.28 | 0.06 | 0.56 | -0.09 | 1.00 | 1.00 | CD2 antigen (cytoplasmic tail) binding protein 2 [Source:MGI Symbol:Acc:MGI:1917483]                                             |
| ENSMUSG00000022568 | Scrb         | 0.46 | 0.00 | 0.03 | -0.20 | 0.18 | 1.00 | 0.02  | 1.00 | 1.00 | scrubbed homolog (Drosophila) [Source:MGI Symbol:Acc:MGI:2145950]                                                                |
| ENSMUSG00000070997 | Ubp3         | 0.67 | 0.00 | 0.03 | -0.30 | 0.17 | 1.00 | 0.12  | 0.71 | 1.00 | UTP3, small subunit (SSU) processome component, homolog (S. cerevisiae) [Source:MGI Symbol:Acc:MGI:1919230]                      |
| ENSMUSG0000000000  | 0000000000   | 0.00 | 0.00 | 0.03 | -0.33 | 0.16 | 0.08 | -0.20 | 0.43 | 1.00 | transmembrane and extracellular repeat containing protein 1 [Source:MGI Symbol:Acc:MGI:3036255]                                  |
| ENSMUSG00000028954 | Nub1         | 0.45 | 0.00 | 0.03 | -0.27 | 0.67 | 0.57 | -0.02 | 0.95 | 1.00 | negative regulator of ubiquitin-like proteins 1 [Source:MGI Symbol:Acc:MGI:1889001]                                              |
| ENSMUSG00000037993 | Dhx38        | 0.58 | 0.00 | 0.03 | -0.26 | 0.16 | 1.00 | -0.01 | 1.00 | 1.00 | DEAH (Asp-Glu-Ala-His) box polypeptide 38 [Source:MGI Symbol:Acc:MGI:1927617]                                                    |
| ENSMUSG00000034854 | Msf2i2       | 0.79 | 0.00 | 0.03 | -0.22 | 0.41 | 1.00 | -0.09 | 0.82 | 1.00 | major facilitator superfamily domain containing 12 [Source:MGI Symbol:Acc:MGI:3604804]                                           |
| ENSMUSG00000018648 | Rps1         | 0.48 | 0.00 | 0.03 | -0.37 | 0.02 | 0.31 | -0.07 | 0.75 | 1.00 | arylnyl-RNA synthetase [Source:MGI Symbol:Acc:MGI:1914297]                                                                       |
| ENSMUSG00000029622 | Arpc1b       | 0.76 | 0.00 | 0.03 | -0.35 | 0.03 | 0.49 | -0.03 | 0.93 | 1.00 | actin related protein 2/3 complex, subunit 18 [Source:MGI Symbol:Acc:MGI:1343142]                                                |
| ENSMUSG00000054484 | Tmem62       | 0.76 | 0.00 | 0.03 | -0.20 | 0.39 | 1.00 | 0.06  | 0.92 | 1.00 | transmembrane protein 62 [Source:MGI Symbol:Acc:MGI:2139461]                                                                     |
| ENSMUSG00000044629 | Scnd1        | 0.44 | 0.00 | 0.03 | -0.13 | 0.37 | 1.00 | 0.08  | 0.67 | 1.00 | SCAN domain-containing 1 [Source:MGI Symbol:Acc:MGI:1343132]                                                                     |
| ENSMUSG00000023277 | Twf2         | 0.82 | 0.00 | 0.03 | -0.30 | 0.33 | 1.00 | -0.10 | 1.00 | 1.00 | twirlin, actin-binding protein, homolog 2 (Drosophila) [Source:MGI Symbol:Acc:MGI:1346078]                                       |
| ENSMUSG00000019755 | Rpd3         | 1.58 | 0.00 | 0.03 | -0.32 | 0.05 | 0.54 | -0.01 | 0.90 | 1.00 | BTE (PRZ) domain containing 19 [Source:MGI Symbol:Acc:MGI:1925861]                                                               |
| ENSMUSG00000042659 | Ard4c        | 0.88 | 0.00 | 0.03 | -0.31 | 0.26 | 1.00 | -0.18 | 0.72 | 1.00 | arrestin domain containing 4 [Source:MGI Symbol:Acc:MGI:1913862]                                                                 |
| ENSMUSG00000044254 | Pcsk9        | 1.21 | 0.00 | 0.03 | -1.03 | 0.01 | 0.15 | -0.10 | 1.00 | 1.00 | proprotein convertase subtilisin/kexin type 9 [Source:MGI Symbol:Acc:MGI:2142060]                                                |
| ENSMUSG00000046807 | Ai646023     | 1.16 | 0.00 | 0.03 | -0.42 | 0.28 | 1.00 | -0.22 | 0.85 | 1.00 | expressed sequence AI646023 [Source:MGI Symbol:Acc:MGI:2143657]                                                                  |
| ENSMUSG00000024209 | Dyrk1        | 0.52 | 0.00 | 0.03 | -0.24 | 0.23 | 0.01 | -0.07 | 0.28 | 1.00 | dual-specificity tyrosine-(Y)-phosphorylation regulator 1 [Source:MGI Symbol:Acc:MGI:1330302]                                    |
| ENSMUSG00000089607 | Rtld13       | 1.30 | 0.00 | 0.03 | -0.23 | 0.55 | 1.00 | -0.16 | 0.84 | 1.00 | tumor necrosis factor receptor superfamily                                                                                       |



|                     |               |      |      |      |       |      |      |       |      |      |                                                                                                       |
|---------------------|---------------|------|------|------|-------|------|------|-------|------|------|-------------------------------------------------------------------------------------------------------|
| ENSMUSG00000028086  | Fbxw7         | 0.84 | 0.01 | 0.04 | -0.32 | 0.25 | 1.00 | 0.08  | 0.90 | 1.00 | F-box and WD-40 domain protein 7 [Source:MGI Symbol:Acc:MGI:1354695]                                  |
| ENSMUSG00000034817  | Mtrr          | 0.90 | 0.01 | 0.04 | -0.51 | 0.10 | 0.84 | 0.18  | 0.79 | 1.00 | 5-methyltetrahydrofolate-homocysteine methyltransferase reductase [Source:MGI Symbol:Acc:MGI:1891037] |
| ENSMUSG00000029175  | 4930471M23Rk  | 0.63 | 0.01 | 0.04 | -0.53 | 0.02 | 0.22 | -0.07 | 0.85 | 1.00 | RIKEN cDNA 4930471M23 gene [Source:MGI Symbol:Acc:MGI:1922169]                                        |
| ENSMUSG00000025995  | Wdr75         | 0.71 | 0.01 | 0.04 | -0.51 | 0.04 | 0.46 | 0.07  | 0.84 | 1.00 | WD repeat domain 75 [Source:MGI Symbol:Acc:MGI:1920924]                                               |
| ENSMUSG00000029726  | Mepce         | 0.47 | 0.01 | 0.04 | -0.29 | 0.07 | 0.65 | -0.07 | 0.79 | 1.00 | methylphosphate capping enzyme [Source:MGI Symbol:Acc:MGI:106477]                                     |
| ENSMUSG00000063659  | Zfp238        | 0.50 | 0.01 | 0.04 | 0.01  | 1.00 | 1.00 | 0.00  | 1.00 | 1.00 | zinc finger protein 238 [Source:MGI Symbol:Acc:MGI:1353609]                                           |
| ENSMUSG00000027245  | Z310003F16Rik | 0.42 | 0.01 | 0.04 | -0.05 | 0.72 | 1.00 | 0.13  | 0.50 | 1.00 | RIKEN cDNA Z310003F16 gene [Source:MGI Symbol:Acc:MGI:1914943]                                        |
| ENSMUSG00000004737  | Gm17045       | 0.66 | 0.01 | 0.04 | -0.13 | 0.57 | 1.00 | 0.06  | 0.93 | 1.00 | predicted gene 17045 [Source:MGI Symbol:Acc:MGI:4037872]                                              |
| ENSMUSG00000034274  | Thoc5         | 0.69 | 0.01 | 0.04 | -0.34 | 0.17 | 1.00 | -0.07 | 0.84 | 1.00 | THO complex 5 [Source:MGI Symbol:Acc:MGI:1351333]                                                     |
| ENSMUSG00000020536  | Lig1          | 0.66 | 0.01 | 0.04 | -0.43 | 0.07 | 0.63 | -0.14 | 0.62 | 1.00 | lethal giant larvae homolog 1 (Drosophila) [Source:MGI Symbol:Acc:MGI:102682]                         |
| ENSMUSG00000018509  | Cenpv         | 0.75 | 0.01 | 0.04 | -0.32 | 0.24 | 1.00 | -0.20 | 0.64 | 1.00 | centromere protein V [Source:MGI Symbol:Acc:MGI:1920389]                                              |
| ENSMUSG0000002157   | I289a         | 1.10 | 0.01 | 0.04 | -0.68 | 0.07 | 0.66 | -0.31 | 0.72 | 1.00 | interleukin 28 receptor alpha [Source:MGI Symbol:Acc:MGI:2429859]                                     |
| ENSMUSG00000040054  | Baz2a         | 0.37 | 0.01 | 0.04 | -0.21 | 0.09 | 0.75 | 0.04  | 0.83 | 1.00 | bromodomain adjacent to zinc finger domain, 2A [Source:MGI Symbol:Acc:MGI:2151152]                    |
| ENSMUSG00000030533  | Unc45a        | 0.46 | 0.01 | 0.04 | -0.19 | 0.25 | 1.00 | -0.01 | 1.00 | 1.00 | unc-45 homolog A (C. elegans) [Source:MGI Symbol:Acc:MGI:2142246]                                     |
| ENSMUSG00000076431  | Sax4          | 0.80 | 0.01 | 0.04 | -0.31 | 0.26 | 1.00 | 0.01  | 1.00 | 1.00 | SRY-box containing gene 4 [Source:MGI Symbol:Acc:MGI:98366]                                           |
| ENSMUSG00000063953  | Amc2          | 0.46 | 0.01 | 0.05 | -0.39 | 0.01 | 0.20 | 0.04  | 0.90 | 1.00 | S-adenosylmethionine decarboxylase 2 [Source:MGI Symbol:Acc:MGI:1333111]                              |
| ENSMUSG00000026195  | Zfp142        | 0.69 | 0.01 | 0.05 | -0.45 | 0.06 | 0.61 | 0.05  | 0.92 | 1.00 | zinc finger protein 142 [Source:MGI Symbol:Acc:MGI:1924514]                                           |
| ENSMUSG00000022512  | Cldn1         | 0.58 | 0.01 | 0.05 | 0.00  | 1.00 | 1.00 | -0.57 | 0.04 | 1.00 | claudin 1 [Source:MGI Symbol:Acc:MGI:1276109]                                                         |
| ENSMUSG00000031226  | 2610029G23Rk  | 0.81 | 0.01 | 0.05 | -0.37 | 0.16 | 1.00 | 0.03  | 1.00 | 1.00 | RIKEN cDNA 2610029G23 gene [Source:MGI Symbol:Acc:MGI:1914933]                                        |
| ENSMUSG00000062895  | Rpsa-ps9      | 0.59 | 0.01 | 0.05 | -0.16 | 0.46 | 1.00 | -0.06 | 0.93 | 1.00 | ribosomal protein SA, pseudogene 9 [Source:MGI Symbol:Acc:MGI:3650393]                                |
| ENSMUSG00000077709  | Srae64        | 0.41 | 0.01 | 0.05 | -0.02 | 0.93 | 1.00 | 0.11  | 0.56 | 1.00 | small nuclear RNA, H/ACA box 64 [Source:MGI Symbol:Acc:MGI:2148175]                                   |
| ENSMUSG00000069270  | Hist1H2ac     | 1.26 | 0.01 | 0.05 | -0.60 | 0.16 | 1.00 | -0.09 | 1.00 | 1.00 | histone cluster 1, H2ac [Source:MGI Symbol:Acc:MGI:2448287]                                           |
| ENSMUSG00000094388  | Gm8783        | 1.89 | 0.01 | 0.05 | -1.07 | 0.09 | 0.74 | 0.32  | 1.00 | 1.00 | predicted pseudogene 8783 [Source:MGI Symbol:Acc:MGI:3646027]                                         |
| ENSMUSG00000096592  | Gm15801       | 1.85 | 0.01 | 0.05 | -1.04 | 0.09 | 0.74 | 0.33  | 0.75 | 1.00 | predicted gene 15801 [Source:MGI Symbol:Acc:MGI:3779625]                                              |
| ENSMUSG00000004085  | B230120H23Rk  | 0.88 | 0.01 | 0.05 | 0.14  | 0.66 | 1.00 | -0.03 | 1.00 | 1.00 | RIKEN cDNA B230120H23 gene [Source:MGI Symbol:Acc:MGI:2443258]                                        |
| ENSMUSG00000004103  | 1700047117Rk2 | 1.06 | 0.01 | 0.05 | -0.31 | 0.39 | 1.00 | 0.20  | 0.76 | 1.00 | RIKEN cDNA 1700047117 gene 2 [Source:MGI Symbol:Acc:MGI:3714351]                                      |
| ENSMUSG000000052415 | Tchh          | 0.72 | 0.01 | 0.05 | -0.29 | 0.23 | 1.00 | 0.06  | 0.92 | 1.00 | trichohyalin [Source:MGI Symbol:Acc:MGI:2177944]                                                      |
| ENSMUSG00000030281  | Il17c         | 0.69 | 0.01 | 0.05 | -0.01 | 1.00 | 1.00 | 0.10  | 0.76 | 1.00 | interleukin 17 receptor C [Source:MGI Symbol:Acc:MGI:2159336]                                         |
| ENSMUSG00000021009  | Ptpn21        | 0.57 | 0.01 | 0.05 | -0.20 | 0.33 | 1.00 | 0.11  | 0.68 | 1.00 | protein tyrosine phosphatase, non-receptor type 21 [Source:MGI Symbol:Acc:MGI:1344406]                |
| ENSMUSG00000080902  | Gm11226       | 0.57 | 0.01 | 0.05 | -0.17 | 0.40 | 1.00 | 0.17  | 0.52 | 1.00 | predicted gene 11226 [Source:MGI Symbol:Acc:MGI:3650241]                                              |
| ENSMUSG00000049354  | Dca77         | 0.42 | 0.01 | 0.05 | -0.19 | 0.19 | 1.00 | 0.05  | 0.83 | 1.00 | DOB1 and CUL4 associated factor 7 [Source:MGI Symbol:Acc:MGI:1919083]                                 |
| ENSMUSG00000052429  | Prrm1         | 0.55 | 0.01 | 0.05 | -0.26 | 0.19 | 1.00 | -0.05 | 0.87 | 1.00 | protein arginine N-methyltransferase 1 [Source:MGI Symbol:Acc:MGI:107846]                             |
| ENSMUSG00000037960  | 1110007C09Rk  | 0.79 | 0.01 | 0.05 | -0.34 | 0.22 | 1.00 | -0.09 | 0.81 | 1.00 | RIKEN cDNA 1110007C09 gene [Source:MGI Symbol:Acc:MGI:1915730]                                        |
| ENSMUSG00000036151  | Tmb82         | 1.01 | 0.01 | 0.05 | 0.22  | 0.45 | 1.00 | -0.08 | 1.00 | 1.00 | transmembrane 6 superfamily member 2 [Source:MGI Symbol:Acc:MGI:1933210]                              |

Sup. Table 1 SET II

| ENSEMBL           | Symbol        | CP versus Sal |        |      | CP versus CP+DCA |        |      | DCA versus Sal |        |      |                                                                                                                                     |
|-------------------|---------------|---------------|--------|------|------------------|--------|------|----------------|--------|------|-------------------------------------------------------------------------------------------------------------------------------------|
|                   |               | logFC         | PValue | FDR  | logFC            | PValue | FDR  | logFC          | PValue | FDR  |                                                                                                                                     |
| ENSMUSG0000065892 | U6            | 5.08          | 0.00   | 0.00 | -3.88            | 0.00   | 0.02 | 1.00           | 1.00   | 1.00 | U6 spliceosomal RNA [Source:RFAM:Acc:RF000026]                                                                                      |
| ENSMUSG0000024912 | Fosl1         | 4.35          | 0.00   | 0.00 | -3.39            | 0.00   | 0.00 | -0.19          | 1.00   | 1.00 | fos-like antigen 1 [Source:MGI Symbol:Acc:MGI:107179]                                                                               |
| ENSMUSG0000044444 | Olfrl442      | 4.26          | 0.00   | 0.01 | -3.37            | 0.00   | 0.01 | 0.49           | 1.00   | 1.00 | olfactory receptor 1442 [Source:MGI Symbol:Acc:MGI:3031276]                                                                         |
| ENSMUSG0000035775 | Krt20         | 7.52          | 0.00   | 0.00 | -3.27            | 0.00   | 0.00 | 0.60           | 1.00   | 1.00 | keratin 20 [Source:MGI Symbol:Acc:MGI:1914059]                                                                                      |
| ENSMUSG0000045030 | Olfrl443      | 3.46          | 0.00   | 0.01 | -2.89            | 0.00   | 0.03 | 0.51           | 1.00   | 1.00 | olfactory receptor 1443 [Source:MGI Symbol:Acc:MGI:3031277]                                                                         |
| ENSMUSG0000018774 | Cd68          | 3.96          | 0.00   | 0.00 | -2.77            | 0.00   | 0.00 | -0.19          | 1.00   | 1.00 | CD68 antigen [Source:MGI Symbol:Acc:MGI:88342]                                                                                      |
| ENSMUSG0000034855 | Cxcl10        | 3.74          | 0.00   | 0.00 | -2.52            | 0.00   | 0.00 | 0.11           | 1.00   | 1.00 | chemokine (C-X-C motif) ligand 10 [Source:MGI Symbol:Acc:MGI:1352450]                                                               |
| ENSMUSG0000008711 | Gm11714       | 2.35          | 0.00   | 0.02 | -2.49            | 0.00   | 0.03 | -0.44          | 1.00   | 1.00 | predicted gene 11714 [Source:MGI Symbol:Acc:MGI:3649214]                                                                            |
| ENSMUSG0000038414 | Egr1          | 4.08          | 0.00   | 0.00 | -2.36            | 0.00   | 0.00 | -0.26          | 1.00   | 1.00 | early growth response 1 [Source:MGI Symbol:Acc:MGI:95295]                                                                           |
| ENSMUSG0000050355 | Spr1a         | 2.21          | 0.00   | 0.00 | -2.29            | 0.00   | 0.00 | -0.21          | 1.00   | 1.00 | small proline-rich protein 1A [Source:MGI Symbol:Acc:MGI:106660]                                                                    |
| ENSMUSG0000047281 | Sfr           | 3.64          | 0.00   | 0.00 | -2.28            | 0.00   | 0.00 | -0.28          | 1.00   | 1.00 | stratfin [Source:MGI Symbol:Acc:MGI:1891831]                                                                                        |
| ENSMUSG0000028885 | Smpd3b        | 4.82          | 0.00   | 0.00 | -2.25            | 0.00   | 0.00 | 0.13           | 1.00   | 1.00 | sphingomyelin phosphodiesterase, acid-like 3B [Source:MGI Symbol:Acc:MGI:1916022]                                                   |
| ENSMUSG0000026526 | Af3           | 3.86          | 0.00   | 0.00 | -2.08            | 0.00   | 0.00 | 0.26           | 1.00   | 1.00 | activating transcription factor 3 [Source:MGI Symbol:Acc:MGI:109384]                                                                |
| ENSMUSG0000029382 | Cxcl1         | 5.49          | 0.00   | 0.00 | -2.02            | 0.00   | 0.00 | 0.48           | 1.00   | 1.00 | chemokine (C-X-C motif) ligand 1 [Source:MGI Symbol:Acc:MGI:108068]                                                                 |
| ENSMUSG0000034223 | Foxj1         | 5.19          | 0.00   | 0.00 | -1.98            | 0.00   | 0.00 | -0.25          | 1.00   | 1.00 | forkhead box J1 [Source:MGI Symbol:Acc:MGI:1347474]                                                                                 |
| ENSMUSG0000019577 | Pdk4          | 3.21          | 0.00   | 0.00 | -1.96            | 0.00   | 0.00 | -0.47          | 0.25   | 1.00 | pyruvate dehydrogenase kinase, isoenzyme 4 [Source:MGI Symbol:Acc:MGI:1351481]                                                      |
| ENSMUSG0000031271 | SerpinA7      | 5.69          | 0.00   | 0.00 | -1.95            | 0.00   | 0.00 | -0.05          | 1.00   | 1.00 | serine (or cysteine) peptidase inhibitor, clade A (alpha-1 antiprotease, antitrypsin), member 7 [Source:MGI Symbol:Acc:MGI:3041197] |
| ENSMUSG0000028494 | Pln2          | 4.74          | 0.00   | 0.00 | -1.87            | 0.00   | 0.00 | -0.06          | 0.91   | 1.00 | perlepin 2 [Source:MGI Symbol:Acc:MGI:87920]                                                                                        |
| ENSMUSG0000041827 | Oasl1         | 3.87          | 0.00   | 0.00 | -1.81            | 0.00   | 0.00 | -0.20          | 1.00   | 1.00 | 2'-5' oligoadenylate synthetase-like 1 [Source:MGI Symbol:Acc:MGI:2180849]                                                          |
| ENSMUSG0000042622 | Maff          | 3.72          | 0.00   | 0.00 | -1.77            | 0.00   | 0.00 | -0.12          | 1.00   | 1.00 | v-maf musculoaponeurotic fibrosarcoma oncogene family, protein F (avian) [Source:MGI Symbol:Acc:MGI:96910]                          |
| ENSMUSG0000022346 | Myc           | 2.95          | 0.00   | 0.00 | -1.61            | 0.00   | 0.00 | -0.30          | 0.82   | 1.00 | myelocytomatosis oncogene [Source:MGI Symbol:Acc:MGI:97250]                                                                         |
| ENSMUSG0000052837 | Junb          | 3.06          | 0.00   | 0.00 | -1.61            | 0.00   | 0.00 | -0.29          | 1.00   | 1.00 | Jun-B oncogene [Source:MGI Symbol:Acc:MGI:96647]                                                                                    |
| ENSMUSG0000034765 | Dusp5         | 2.41          | 0.00   | 0.00 | -1.59            | 0.00   | 0.03 | -0.38          | 1.00   | 1.00 | dual specificity phosphatase 5 [Source:MGI Symbol:Acc:MGI:2685183]                                                                  |
| ENSMUSG0000024521 | Pmpa1         | 2.43          | 0.00   | 0.00 | -1.59            | 0.00   | 0.00 | -0.02          | 1.00   | 1.00 | phorbol-12-myristate-13-acetate-induced protein 1 [Source:MGI Symbol:Acc:MGI:1931046]                                               |
| ENSMUSG0000005413 | Hmox1         | 2.89          | 0.00   | 0.00 | -1.59            | 0.00   | 0.00 | 0.09           | 0.77   | 1.00 | heme oxygenase (decycling) 1 [Source:MGI Symbol:Acc:MGI:96163]                                                                      |
| ENSMUSG0000006445 | Epha2         | 2.21          | 0.00   | 0.00 | -1.56            | 0.00   | 0.00 | -0.24          | 0.72   | 1.00 | Eph receptor A2 [Source:MGI Symbol:Acc:MGI:95278]                                                                                   |
| ENSMUSG0000027171 | Prrg4         | 3.53          | 0.00   | 0.00 | -1.56            | 0.00   | 0.01 | -0.26          | 1.00   | 1.00 | proline rich G1a (G-carboxyglutamic acid) 4 (transmembrane) [Source:MGI Symbol:Acc:MGI:2442211]                                     |
| ENSMUSG0000016235 | Lornf3        | 2.42          | 0.00   | 0.00 | -1.55            | 0.00   | 0.00 | 0.20           | 0.81   | 1.00 | LON peptidase N-terminal domain and ring finger 3 [Source:MGI Symbol:Acc:MGI:1921615]                                               |
| ENSMUSG0000023905 | Tnfrsf12a     | 4.05          | 0.00   | 0.00 | -1.51            | 0.00   | 0.00 | 0.27           | 0.50   | 1.00 | tumor necrosis factor receptor superfamily, member 12a [Source:MGI Symbol:Acc:MGI:1351484]                                          |
| ENSMUSG0000020422 | Btg2          | 3.83          | 0.00   | 0.00 | -1.49            | 0.00   | 0.00 | -0.13          | 1.00   | 1.00 | B cell translocation gene 2, anti-proliferative [Source:MGI Symbol:Acc:MGI:108384]                                                  |
| ENSMUSG0000044436 | R30305J03Rik  | 3.41          | 0.00   | 0.00 | -1.47            | 0.00   | 0.00 | -0.05          | 1.00   | 1.00 | RIKEN cDNA B430305J03 gene [Source:MGI Symbol:Acc:MGI:3697707]                                                                      |
| ENSMUSG0000033802 | Srxn1         | 2.63          | 0.00   | 0.00 | -1.44            | 0.00   | 0.00 | -0.14          | 0.49   | 1.00 | sulfiredoxin 1 homolog (S. carvisiae) [Source:MGI Symbol:Acc:MGI:1049711]                                                           |
| ENSMUSG0000036894 | Rap2b         | 3.37          | 0.00   | 0.00 | -1.44            | 0.00   | 0.00 | 0.02           | 1.00   | 1.00 | RAP2B, member of RAS oncogene family [Source:MGI Symbol:Acc:MGI:1921262]                                                            |
| ENSMUSG0000028688 | Pk3           | 2.35          | 0.00   | 0.00 | -1.44            | 0.00   | 0.00 | -0.31          | 0.49   | 1.00 | polo-like kinase 3 [Source:MGI Symbol:Acc:MGI:109604]                                                                               |
| ENSMUSG0000016271 | Irfd1         | 2.08          | 0.00   | 0.00 | -1.41            | 0.00   | 0.00 | 0.08           | 0.83   | 1.00 | interferon-related developmental regulator 1 [Source:MGI Symbol:Acc:MGI:1316717]                                                    |
| ENSMUSG0000020205 | Phlda1        | 1.82          | 0.00   | 0.00 | -1.38            | 0.00   | 0.00 | 0.11           | 1.00   | 1.00 | pleckstrin homology-like domain, family A, member 1 [Source:MGI Symbol:Acc:MGI:1096880]                                             |
| ENSMUSG0000091747 | D17H6S56E-5   | 2.46          | 0.00   | 0.00 | -1.35            | 0.00   | 0.00 | 0.24           | 0.64   | 1.00 | DNA segment, Chr 17, human D6S56E 5 [Source:MGI Symbol:Acc:MGI:1306799]                                                             |
| ENSMUSG0000046223 | Plaur         | 1.89          | 0.00   | 0.00 | -1.33            | 0.00   | 0.03 | -0.03          | 1.00   | 1.00 | plasminogen activator, urokinase receptor [Source:MGI Symbol:Acc:MGI:97612]                                                         |
| ENSMUSG0000047061 | Gm9817        | 2.32          | 0.00   | 0.00 | -1.33            | 0.00   | 0.03 | 0.01           | 1.00   | 1.00 | predicted gene 9817 [Source:MGI Symbol:Acc:MGI:3809102]                                                                             |
| ENSMUSG0000040511 | Pvr           | 2.03          | 0.00   | 0.00 | -1.32            | 0.00   | 0.00 | 0.03           | 1.00   | 1.00 | polarized virus receptor [Source:MGI Symbol:Acc:MGI:107741]                                                                         |
| ENSMUSG0000056745 | Nfii3         | 2.18          | 0.00   | 0.00 | -1.32            | 0.00   | 0.04 | 0.66           | 0.36   | 1.00 | nuclear factor, interleukin 3, regulated [Source:MGI Symbol:Acc:MGI:109495]                                                         |
| ENSMUSG0000037887 | Dusp8         | 2.59          | 0.00   | 0.00 | -1.31            | 0.00   | 0.01 | 0.16           | 1.00   | 1.00 | dual specificity phosphatase 8 [Source:MGI Symbol:Acc:MGI:106626]                                                                   |
| ENSMUSG0000028001 | Fga           | 2.54          | 0.00   | 0.00 | -1.30            | 0.00   | 0.00 | -0.16          | 0.72   | 1.00 | fibrinogen alpha chain [Source:MGI Symbol:Acc:MGI:1316726]                                                                          |
| ENSMUSG0000078915 | Hsp25-ps1     | 2.28          | 0.00   | 0.00 | -1.25            | 0.00   | 0.02 | 0.04           | 1.00   | 1.00 | heat shock protein 25, pseudogene 1 [Source:MGI Symbol:Acc:MGI:96241]                                                               |
| ENSMUSG0000096925 | mmu-mir-29b-2 | 1.28          | 0.00   | 0.00 | -1.24            | 0.00   | 0.00 | -0.06          | 0.82   | 1.00 | mmu-mir-29b-2 [Source:miRBase:Acc:MI0000712]                                                                                        |
| ENSMUSG0000074796 | Slc4a11       | 1.65          | 0.00   | 0.00 | -1.22            | 0.00   | 0.00 | -0.35          | 0.19   | 1.00 | solute carrier family 4, sodium bicarbonate transporter-like, member 11 [Source:MGI Symbol:Acc:MGI:2138987]                         |
| ENSMUSG0000097877 | R1            | 3.38          | 0.00   | 0.00 | -1.22            | 0.00   | 0.00 | 0.05           | 0.84   | 1.00 |                                                                                                                                     |
| ENSMUSG0000030283 | Btc3          | 3.97          | 0.00   | 0.00 | -1.22            | 0.00   | 0.00 | -0.14          | 1.00   | 1.00 | BCL2 binding component 3 [Source:MGI Symbol:Acc:MGI:2181667]                                                                        |
| ENSMUSG0000000078 | Klf6          | 2.34          | 0.00   | 0.00 | -1.21            | 0.00   | 0.00 | 0.09           | 0.80   | 1.00 | Kruppel-like factor 6 [Source:MGI Symbol:Acc:MGI:1346318]                                                                           |
| ENSMUSG0000074183 | Gsta1         | 3.46          | 0.00   | 0.00 | -1.19            | 0.00   | 0.00 | -0.36          | 0.53   | 1.00 | glutathione S-transferase, alpha 1 (Ya) [Source:MGI Symbol:Acc:MGI:1095417]                                                         |
| ENSMUSG0000025225 | Nrk2b         | 2.20          | 0.00   | 0.00 | -1.17            | 0.00   | 0.00 | -0.08          | 0.92   | 1.00 | nuclear factor of kappa light polypeptide gene enhancer in B cells 2, p49/p100 [Source:MGI Symbol:Acc:MGI:1098800]                  |
| ENSMUSG0000049511 | Hspb1         | 2.21          | 0.00   | 0.00 | -1.17            | 0.00   | 0.00 | 0.07           | 1.00   | 1.00 | heat shock protein 1 [Source:MGI Symbol:Acc:MGI:96240]                                                                              |
| ENSMUSG0000052684 | Jun           | 2.43          | 0.00   | 0.00 | -1.16            | 0.00   | 0.00 | 0.10           | 0.78   | 1.00 | Jun oncogene [Source:MGI Symbol:Acc:MGI:96646]                                                                                      |
| ENSMUSG0000053746 | Pth1          | 3.00          | 0.00   | 0.00 | -1.16            | 0.00   | 0.01 | 0.13           | 1.00   | 1.00 | peptidyl-RNA hydrolase 1 homolog (S. cerevisiae) [Source:MGI Symbol:Acc:MGI:1913779]                                                |
| ENSMUSG0000040485 | Pdgfrb        | 1.44          | 0.00   | 0.00 | -1.15            | 0.00   | 0.00 | -0.22          | 0.59   | 1.00 | platelet derived growth factor, B polypeptide [Source:MGI Symbol:Acc:MGI:97528]                                                     |
| ENSMUSG0000053175 | Bcl3          | 2.22          | 0.00   | 0.00 | -1.15            | 0.00   | 0.00 | 0.09           | 1.00   | 1.00 | B cell leukemia/lymphoma 3 [Source:MGI Symbol:Acc:MGI:88140]                                                                        |
| ENSMUSG0000030772 | Ckap2         | 4.98          | 0.00   | 0.00 | -1.15            | 0.00   | 0.02 | -0.09          | 1.00   | 1.00 | cytoskeleton associated protein 2 [Source:MGI Symbol:Acc:MGI:1931797]                                                               |
| ENSMUSG0000056501 | Cebp3         | 2.24          | 0.00   | 0.00 | -1.14            | 0.00   | 0.00 | -0.28          | 0.51   | 1.00 | CCAAT/enhancer binding protein (C/EBP), beta [Source:MGI Symbol:Acc:MGI:88373]                                                      |
| ENSMUSG0000023067 | Cdkn1a        | 6.63          | 0.00   | 0.00 | -1.13            | 0.00   | 0.00 | -0.48          | 0.63   | 1.00 | cyclin-dependent kinase inhibitor 1A (P21) [Source:MGI Symbol:Acc:MGI:104556]                                                       |
| ENSMUSG0000042041 | 2010003K11Rik | 3.25          | 0.00   | 0.00 | -1.12            | 0.00   | 0.01 | -0.66          | 0.75   | 1.00 | RIKEN cDNA 2010003K11 gene [Source:MGI Symbol:Acc:MGI:1917111]                                                                      |
| ENSMUSG0000051435 | Cd14          | 2.30          | 0.00   | 0.00 | -1.12            | 0.00   | 0.01 | -0.13          | 1.00   | 1.00 | CD14 antigen [Source:MGI Symbol:Acc:MGI:88318]                                                                                      |
| ENSMUSG0000022895 | Adamts1       | 1.45          | 0.00   | 0.00 | -1.09            | 0.00   | 0.00 | 0.25           | 0.17   | 1.00 | a disintegrin-like and metalloproteinase (reprolysin type) with thrombospondin type 1 motif, 1 [Source:MGI Symbol:Acc:MGI:109249]   |
| ENSMUSG0000044456 | Csm2          | 2.25          | 0.00   | 0.00 | -1.08            | 0.00   | 0.00 | 0.05           | 1.00   | 1.00 | cysteine-serine-rich nuclear protein 2 [Source:MGI Symbol:Acc:MGI:2368652]                                                          |
| ENSMUSG0000048711 | Hmgaa1        | 1.49          | 0.00   | 0.00 | -1.08            | 0.00   | 0.00 | -0.06          | 1.00   | 1.00 | high mobility group AT-hook 1 [Source:MGI Symbol:Acc:MGI:96160]                                                                     |
| ENSMUSG0000049558 | Tsku          | 0.99          | 0.00   | 0.00 | -1.08            | 0.00   | 0.00 | -0.03          | 1.00   | 1.00 | tsukushi [Source:MGI Symbol:Acc:MGI:2443855]                                                                                        |
| ENSMUSG0000078245 | Hmgaa1-rs1    | 1.47          | 0.00   | 0.00 | -1.08            | 0.00   | 0.00 | -0.07          | 0.90   | 1.00 | high mobility group AT-hook 1, related sequence 1 [Source:MGI Symbol:Acc:MGI:96161]                                                 |
| ENSMUSG0000040663 | Ctcf1         | 2.26          | 0.00   | 0.00 | -1.07            | 0.00   | 0.00 | -0.22          | 0.86   | 1.00 | cardiotrophin-like cytokine factor 1 [Source:MGI Symbol:Acc:MGI:1930088]                                                            |
| ENSMUSG0000090634 | Gm8126        | 3.12          | 0.00   | 0.00 | -1.07            | 0.00   | 0.02 | 0.07           | 1.00   | 1.00 | predicted gene 8126 [Source:MGI Symbol:Acc:MGI:3646861]                                                                             |
| ENSMUSG0000019852 | Tnfrsf3       | 1.89          | 0.00   | 0.00 | -1.06            | 0.00   | 0.02 | 0.01           | 1.00   | 1.00 | tumor necrosis factor, alpha-induced protein 3 [Source:MGI Symbol:Acc:MGI:1196377]                                                  |
| ENSMUSG0000047407 | Tgfr1         | 1.66          | 0.00   | 0.00 | -1.05            | 0.00   | 0.00 | -0.16          | 0.72   | 1.00 | TGF-beta-induced factor homeobox 1 [Source:MGI Symbol:Acc:MGI:1194497]                                                              |
| ENSMUSG0000038508 | Gdf15         | 4.82          | 0.00   | 0.00 | -1.05            | 0.00   | 0.00 | -0.02          | 1.00   | 1.00 | growth differentiation factor 15 [Source:MGI Symbol:Acc:MGI:1346047]                                                                |
| ENSMUSG0000014595 | Csf1          | 1.48          | 0.00   | 0.00 | -1.04            | 0.00   | 0.03 | -0.02          | 1.00   | 1.00 | colony stimulating factor 1 (macrophage) [Source:MGI Symbol:Acc:MGI:1339753]                                                        |
| ENSMUSG000001473  | Tubb6         | 2.80          | 0.00   | 0.00 | -1.04            | 0.00   | 0.00 | 0.07           | 1.00   | 1.00 | tubulin, beta 6 class V [Source:MGI Symbol:Acc:MGI:1915201]                                                                         |
| ENSMUSG0000053566 | Ier2          | 1.82          | 0.00   | 0.00 | -1.04            | 0.00   | 0.00 | -0.12          | 0.88   | 1.00 | immediate early response 2 [Source:MGI Symbol:Acc:MGI:104815]                                                                       |
| ENSMUSG0000041605 | 5730559C18Rik | 2.71          | 0.00   | 0.00 | -1.04            | 0.00   | 0.00 | -0.15          | 0.77   | 1.00 | RIKEN cDNA 5730559C18 gene [Source:MGI Symbol:Acc:MGI:1921579]                                                                      |
| ENSMUSG0000035356 | Nrk1b         | 2.08          | 0.00   | 0.00 | -1.03            | 0.00   | 0.00 | -0.21          | 0.61   | 1.00 | nuclear factor of kappa light polypeptide gene enhancer in B cells inhibitor, zeta [Source:MGI Symbol:Acc:MGI:1931595]              |
| ENSMUSG0000060515 | Tor3a         | 1.54          | 0.00   | 0.00 | -1.03            | 0.00   | 0.00 | -0             |        |      |                                                                                                                                     |

|                    |               |      |      |      |       |      |      |       |      |      |                                                                                                                        |
|--------------------|---------------|------|------|------|-------|------|------|-------|------|------|------------------------------------------------------------------------------------------------------------------------|
| ENSMUSG0000036057  | Ptpn23        | 1.42 | 0.00 | 0.00 | -0.85 | 0.00 | 0.00 | -0.03 | 0.96 | 1.00 | protein tyrosine phosphatase, non-receptor type 23 [Source:MGI Symbol:Acc:MGI:2144837]                                 |
| ENSMUSG0000026064  | Ptp4b1        | 1.74 | 0.00 | 0.00 | -0.85 | 0.00 | 0.00 | 0.11  | 0.54 | 1.00 | protein tyrosine phosphatase 4a1 [Source:MGI Symbol:Acc:MGI:1277096]                                                   |
| ENSMUSG0000020086  | Rhbfd2        | 2.33 | 0.00 | 0.00 | -0.85 | 0.00 | 0.00 | -0.11 | 0.78 | 1.00 | rhomboid 5 homolog 2 (Drosophila) [Source:MGI Symbol:Acc:MGI:2442473]                                                  |
| ENSMUSG000003554   | Gc            | 4.15 | 0.00 | 0.00 | -0.85 | 0.00 | 0.00 | -0.61 | 0.12 | 1.00 | group specific component [Source:MGI Symbol:Acc:MGI:95669]                                                             |
| ENSMUSG0000004043  | Stat3         | 1.63 | 0.00 | 0.00 | -0.84 | 0.00 | 0.00 | -0.07 | 0.77 | 1.00 | signal transducer and activator of transcription 3 [Source:MGI Symbol:Acc:MGI:103038]                                  |
| ENSMUSG0000008752  | 9830144P21.2  | 2.20 | 0.00 | 0.00 | -0.84 | 0.00 | 0.02 | 0.14  | 0.87 | 1.00 | RIKEN cDNA 9830144P21 gene [Source:MGI Symbol:Acc:MGI:3041171]                                                         |
| ENSMUSG0000026596  | Abi2          | 1.34 | 0.00 | 0.00 | -0.83 | 0.00 | 0.00 | 0.15  | 0.66 | 1.00 | v-abl Abelson murine leukemia viral oncogene 2 (arg. Abelson-related gene) [Source:MGI Symbol:Acc:MGI:87860]           |
| ENSMUSG0000028195  | Cyrf1         | 2.81 | 0.00 | 0.00 | -0.81 | 0.00 | 0.00 | 0.32  | 0.33 | 1.00 | cysteine rich protein 61 [Source:MGI Symbol:Acc:MGI:88613]                                                             |
| ENSMUSG0000011089  | E03R3.0       | 1.30 | 0.00 | 0.00 | -0.81 | 0.00 | 0.00 | -0.15 | 0.68 | 1.00 | RIKEN cDNA 241009E03 gene [Source:MGI Symbol:Acc:MGI:1920942]                                                          |
| ENSMUSG0000020105  | Dld4          | 1.71 | 0.00 | 0.00 | -0.80 | 0.00 | 0.00 | 0.40  | 0.18 | 1.00 | DNA-damage-inducible transcript 4 [Source:MGI Symbol:Acc:MGI:1921997]                                                  |
| ENSMUSG0000015837  | Sqstm1        | 1.30 | 0.00 | 0.00 | -0.80 | 0.00 | 0.00 | -0.18 | 0.04 | 1.00 | sequestosome 1 [Source:MGI Symbol:Acc:MGI:107831]                                                                      |
| ENSMUSG0000046875  | Irgm1         | 0.87 | 0.00 | 0.00 | -0.79 | 0.00 | 0.00 | -0.06 | 0.82 | 1.00 | immunity-related GTPase family M member 1 [Source:MGI Symbol:Acc:MGI:107567]                                           |
| ENSMUSG0000032501  | Tnb1          | 1.07 | 0.00 | 0.00 | -0.79 | 0.00 | 0.01 | 0.08  | 0.84 | 1.00 | tribbles homolog 1 (Drosophila) [Source:MGI Symbol:Acc:MGI:2443397]                                                    |
| ENSMUSG00000074175 | Gm10639       | 2.51 | 0.00 | 0.00 | -0.78 | 0.00 | 0.00 | -0.27 | 0.51 | 1.00 | predicted gene 10639 [Source:MGI Symbol:Acc:MGI:3704339]                                                               |
| ENSMUSG000002189C  | Eaf1          | 0.74 | 0.00 | 0.00 | -0.76 | 0.00 | 0.00 | 0.05  | 0.81 | 1.00 | ELL associated factor 1 [Source:MGI Symbol:Acc:MGI:1921677]                                                            |
| ENSMUSG000002250C  | Itaf          | 1.30 | 0.00 | 0.00 | -0.76 | 0.00 | 0.00 | -0.15 | 0.58 | 1.00 | LPS-induced TN factor [Source:MGI Symbol:Acc:MGI:1929512]                                                              |
| ENSMUSG0000008395  | Carhsp1       | 1.23 | 0.00 | 0.00 | -0.76 | 0.00 | 0.00 | -0.11 | 0.63 | 1.00 | calcium regulated heat stable protein 1 [Source:MGI Symbol:Acc:MGI:1196368]                                            |
| ENSMUSG000002602C  | Nop58         | 1.03 | 0.00 | 0.00 | -0.76 | 0.00 | 0.01 | -0.15 | 0.59 | 1.00 | NOP58 ribonucleoprotein homolog (yeast) [Source:MGI Symbol:Acc:MGI:1933184]                                            |
| ENSMUSG0000030403  | Vasp          | 1.11 | 0.00 | 0.00 | -0.76 | 0.00 | 0.00 | -0.01 | 1.00 | 1.00 | vasodilator-stimulated phosphoprotein [Source:MGI Symbol:Acc:MGI:109268]                                               |
| ENSMUSG000004043   | Ppp115a       | 1.28 | 0.00 | 0.00 | -0.75 | 0.00 | 0.03 | -0.05 | 1.00 | 1.00 | protein phosphatase 1, regulatory (inhibitor) subunit 15A [Source:MGI Symbol:Acc:MGI:1927072]                          |
| ENSMUSG0000018143  | Malik         | 0.80 | 0.00 | 0.00 | -0.75 | 0.00 | 0.00 | -0.18 | 0.47 | 1.00 | v-maf musculoaponeurotic fibrosarcoma oncogene family, protein K (avian) [Source:MGI Symbol:Acc:MGI:99951]             |
| ENSMUSG0000020274  | Trnfrs10b     | 3.28 | 0.00 | 0.00 | -0.75 | 0.00 | 0.05 | 0.03  | 1.00 | 1.00 | tumor necrosis factor receptor superfamily, member 10b [Source:MGI Symbol:Acc:MGI:1341090]                             |
| ENSMUSG000002766   | Skil          | 1.28 | 0.00 | 0.00 | -0.75 | 0.00 | 0.00 | 0.08  | 0.80 | 1.00 | SKH-like [Source:MGI Symbol:Acc:MGI:106203]                                                                            |
| ENSMUSG0000008514  | Mir22hg       | 0.54 | 0.00 | 0.01 | -0.75 | 0.00 | 0.00 | 0.16  | 0.40 | 1.00 | Mir22 host gene (non-protein coding) [Source:MGI Symbol:Acc:MGI:1914348]                                               |
| ENSMUSG000002899C  | Rcc1          | 0.88 | 0.00 | 0.00 | -0.74 | 0.00 | 0.02 | -0.16 | 0.62 | 1.00 | regulator of chromosome condensation 1 [Source:MGI Symbol:Acc:MGI:1913989]                                             |
| ENSMUSG000003989C  | Dna4          | 2.69 | 0.00 | 0.00 | -0.74 | 0.00 | 0.00 | -0.18 | 0.59 | 1.00 | deltex 4 homolog (Drosophila) [Source:MGI Symbol:Acc:MGI:2672905]                                                      |
| ENSMUSG0000024164  | C3            | 3.41 | 0.00 | 0.00 | -0.74 | 0.00 | 0.00 | -0.12 | 0.73 | 1.00 | complement component 3 [Source:MGI Symbol:Acc:MGI:88227]                                                               |
| ENSMUSG000006887C  | Cgn           | 1.11 | 0.00 | 0.00 | -0.74 | 0.00 | 0.00 | -0.89 | 0.00 | 0.03 | cingulin [Source:MGI Symbol:Acc:MGI:1927237]                                                                           |
| ENSMUSG00000041237 | Pkr           | 1.78 | 0.00 | 0.00 | -0.73 | 0.00 | 0.00 | -0.17 | 0.50 | 1.00 | pyruvate kinase liver and red blood cell [Source:MGI Symbol:Acc:MGI:97604]                                             |
| ENSMUSG0000022895  | Ets2          | 1.09 | 0.00 | 0.00 | -0.73 | 0.00 | 0.00 | -0.03 | 0.90 | 1.00 | E26 avian leukemia oncogene 2, 3' domain [Source:MGI Symbol:Acc:MGI:95456]                                             |
| ENSMUSG000002803C  | Dnajb4        | 1.32 | 0.00 | 0.00 | -0.73 | 0.00 | 0.00 | 0.32  | 0.19 | 1.00 | DnaJ (Hsp40) homolog, subfamily B, member 4 [Source:MGI Symbol:Acc:MGI:1914285]                                        |
| ENSMUSG000002897   | Il17ra        | 0.70 | 0.00 | 0.01 | -0.73 | 0.00 | 0.01 | 0.18  | 0.44 | 1.00 | interleukin 17 receptor A [Source:MGI Symbol:Acc:MGI:107399]                                                           |
| ENSMUSG0000026107  | Nabp1         | 1.36 | 0.00 | 0.00 | -0.73 | 0.00 | 0.00 | -0.05 | 0.76 | 1.00 | nucleic acid binding protein 1 [Source:MGI Symbol:Acc:MGI:1923258]                                                     |
| ENSMUSG0000028327  | 1300002K09Rik | 2.89 | 0.00 | 0.00 | -0.72 | 0.00 | 0.00 | -0.20 | 0.66 | 1.00 | RIKEN cDNA 1300002K09 gene [Source:MGI Symbol:Acc:MGI:1921402]                                                         |
| ENSMUSG000000882C  | Dnajc5        | 1.07 | 0.00 | 0.00 | -0.72 | 0.00 | 0.00 | 0.01  | 0.97 | 1.00 | DnaJ (Hsp40) homolog, subfamily C, member 5 [Source:MGI Symbol:Acc:MGI:892995]                                         |
| ENSMUSG0000042784  | Muc1          | 1.42 | 0.00 | 0.00 | -0.72 | 0.00 | 0.05 | -0.06 | 1.00 | 1.00 | mucin 1, transmembrane [Source:MGI Symbol:Acc:MGI:97231]                                                               |
| ENSMUSG0000013625  | Cad           | 1.43 | 0.00 | 0.00 | -0.72 | 0.00 | 0.02 | -0.02 | 1.00 | 1.00 | carbamoyl-phosphate synthetase 2, aspartate transcarbamylase, and dihydroorotase [Source:MGI Symbol:Acc:MGI:1916969]   |
| ENSMUSG000003153C  | Dusp4         | 1.69 | 0.00 | 0.00 | -0.71 | 0.00 | 0.02 | -0.07 | 0.90 | 1.00 | dual specificity phosphatase 4 [Source:MGI Symbol:Acc:MGI:2442191]                                                     |
| ENSMUSG0000042688  | Mapk6         | 1.03 | 0.00 | 0.00 | -0.71 | 0.00 | 0.00 | 0.04  | 0.94 | 1.00 | mitogen-activated protein kinase 6 [Source:MGI Symbol:Acc:MGI:1354946]                                                 |
| ENSMUSG0000007872  | I3            | 1.00 | 0.00 | 0.00 | -0.70 | 0.00 | 0.00 | -0.06 | 0.77 | 1.00 | inhibitor of DNA binding 3 [Source:MGI Symbol:Acc:MGI:96398]                                                           |
| ENSMUSG0000030947  | Bog3          | 0.92 | 0.00 | 0.00 | -0.70 | 0.00 | 0.00 | 0.00  | 0.66 | 1.00 | BCL2-associated atypical protein 3 [Source:MGI Symbol:Acc:MGI:1352493]                                                 |
| ENSMUSG000002895C  | Trp53         | 1.01 | 0.00 | 0.00 | -0.70 | 0.00 | 0.00 | -0.00 | 0.81 | 1.00 | transformation related protein 53 [Source:MGI Symbol:Acc:MGI:98834]                                                    |
| ENSMUSG0000025194  | Abcc2         | 1.67 | 0.00 | 0.00 | -0.70 | 0.00 | 0.00 | 0.04  | 0.81 | 1.00 | ATP-binding cassette, sub-family C (CFTR/MRP), member 2 [Source:MGI Symbol:Acc:MGI:1352447]                            |
| ENSMUSG000002286C  | Cxadr         | 1.13 | 0.00 | 0.00 | -0.69 | 0.00 | 0.00 | 0.11  | 0.63 | 1.00 | coxsackie virus and adenovirus receptor [Source:MGI Symbol:Acc:MGI:1201679]                                            |
| ENSMUSG000003235C  | Gclc          | 1.37 | 0.00 | 0.00 | -0.69 | 0.00 | 0.00 | 0.27  | 0.08 | 1.00 | glutamate-cysteine ligase, catalytic subunit [Source:MGI Symbol:Acc:MGI:104990]                                        |
| ENSMUSG0000030341  | Trnfrs11a     | 1.37 | 0.00 | 0.00 | -0.69 | 0.00 | 0.00 | -0.12 | 0.62 | 1.00 | tumor necrosis factor receptor superfamily, member 1a [Source:MGI Symbol:Acc:MGI:1314884]                              |
| ENSMUSG0000067787  | Bkap          | 0.98 | 0.00 | 0.00 | -0.69 | 0.00 | 0.00 | -0.01 | 1.00 | 1.00 | bladder cancer associated protein homolog (human) [Source:MGI Symbol:Acc:MGI:1858907]                                  |
| ENSMUSG0000035395  | 3230401D17Rik | 0.83 | 0.00 | 0.00 | -0.68 | 0.00 | 0.03 | -0.01 | 1.00 | 1.00 | RIKEN cDNA 3230401D17 gene [Source:MGI Symbol:Acc:MGI:1913930]                                                         |
| ENSMUSG0000041801  | Phlda3        | 5.34 | 0.00 | 0.00 | -0.68 | 0.00 | 0.00 | 0.15  | 1.00 | 1.00 | pleckstrin homology-like domain, family A, member 3 [Source:MGI Symbol:Acc:MGI:1351485]                                |
| ENSMUSG000005793C  | Gsta2         | 2.20 | 0.00 | 0.00 | -0.68 | 0.00 | 0.00 | -0.47 | 0.09 | 1.00 | glutathione S-transferase, alpha 2 (Yc2) [Source:MGI Symbol:Acc:MGI:95863]                                             |
| ENSMUSG000002256C  | Plec          | 1.26 | 0.00 | 0.00 | -0.68 | 0.00 | 0.00 | 0.06  | 0.73 | 1.00 | plectin [Source:MGI Symbol:Acc:MGI:1277961]                                                                            |
| ENSMUSG0000028771  | Ptpn12        | 1.12 | 0.00 | 0.00 | -0.68 | 0.00 | 0.01 | 0.07  | 0.85 | 1.00 | protein tyrosine phosphatase, non-receptor type 12 [Source:MGI Symbol:Acc:MGI:104673]                                  |
| ENSMUSG000003596C  | Rusc2         | 1.27 | 0.00 | 0.00 | -0.67 | 0.00 | 0.01 | -0.16 | 0.62 | 1.00 | RUN and SH3 domain containing 2 [Source:MGI Symbol:Acc:MGI:2140371]                                                    |
| ENSMUSG000002884C  | Map7d1        | 1.02 | 0.00 | 0.00 | -0.67 | 0.00 | 0.01 | 0.04  | 0.93 | 1.00 | microtubule-associated protein 7 domain containing 1 [Source:MGI Symbol:Acc:MGI:2384297]                               |
| ENSMUSG000007370C  | Khi2t1        | 0.78 | 0.00 | 0.00 | -0.67 | 0.00 | 0.00 | -0.08 | 0.82 | 1.00 | kelch-like 21 (Drosophila) [Source:MGI Symbol:Acc:MGI:1919288]                                                         |
| ENSMUSG00000054364 | Rnob          | 1.37 | 0.00 | 0.00 | -0.66 | 0.00 | 0.00 | -0.06 | 0.78 | 1.00 | ras homolog gene family, member B [Source:MGI Symbol:Acc:MGI:107949]                                                   |
| ENSMUSG0000090877  | Hspab1        | 1.18 | 0.00 | 0.00 | -0.66 | 0.00 | 0.00 | 0.15  | 0.45 | 1.00 | heat shock protein 1B [Source:MGI Symbol:Acc:MGI:99517]                                                                |
| ENSMUSG000003956C  | Ccp1          | 1.27 | 0.00 | 0.00 | -0.66 | 0.00 | 0.00 | 0.26  | 0.25 | 1.00 | cytidine 5'-triphosphate synthase [Source:MGI Symbol:Acc:MGI:1858304]                                                  |
| ENSMUSG000003140C  | G6pd          | 1.68 | 0.00 | 0.00 | -0.66 | 0.00 | 0.00 | -0.01 | 1.00 | 1.00 | glucose-6-phosphate dehydrogenase X-linked [Source:MGI Symbol:Acc:MGI:105979]                                          |
| ENSMUSG000001836C  | Knsa2         | 0.92 | 0.00 | 0.00 | -0.66 | 0.00 | 0.03 | 0.12  | 0.72 | 1.00 | karyopherin (importin) alpha 2 [Source:MGI Symbol:Acc:MGI:103561]                                                      |
| ENSMUSG00000091971 | Hspa1a        | 1.11 | 0.00 | 0.00 | -0.66 | 0.00 | 0.00 | 0.12  | 0.62 | 1.00 | heat shock protein 1A [Source:MGI Symbol:Acc:MGI:96244]                                                                |
| ENSMUSG0000028961  | Pgd           | 1.77 | 0.00 | 0.00 | -0.66 | 0.00 | 0.00 | -0.04 | 0.82 | 1.00 | phosphogluconate dehydrogenase [Source:MGI Symbol:Acc:MGI:97553]                                                       |
| ENSMUSG0000020184  | Mdm2          | 2.30 | 0.00 | 0.00 | -0.65 | 0.00 | 0.00 | 0.11  | 0.57 | 1.00 | transformed mouse 3T3 cell double minute 2 [Source:MGI Symbol:Acc:MGI:96952]                                           |
| ENSMUSG0000000134  | Tfe3          | 0.98 | 0.00 | 0.00 | -0.65 | 0.00 | 0.02 | 0.00  | 1.00 | 1.00 | transcription factor E3 [Source:MGI Symbol:Acc:MGI:98511]                                                              |
| ENSMUSG0000018427  | Ypel2         | 2.23 | 0.00 | 0.00 | -0.65 | 0.00 | 0.00 | -0.27 | 0.46 | 1.00 | yippe-like 2 (Drosophila) [Source:MGI Symbol:Acc:MGI:1925114]                                                          |
| ENSMUSG0000005054  | Csb           | 1.79 | 0.00 | 0.00 | -0.65 | 0.00 | 0.00 | 0.00  | 1.00 | 1.00 | cystatin B [Source:MGI Symbol:Acc:MGI:109514]                                                                          |
| ENSMUSG0000021025  | Ntkbia        | 1.17 | 0.00 | 0.00 | -0.65 | 0.00 | 0.01 | -0.13 | 0.66 | 1.00 | nuclear factor of kappa light polypeptide gene enhancer in B cells inhibitor, alpha [Source:MGI Symbol:Acc:MGI:104741] |
| ENSMUSG000002296C  | Ilnr2         | 1.40 | 0.00 | 0.00 | -0.65 | 0.00 | 0.01 | 0.09  | 0.77 | 1.00 | interferon gamma receptor 2 [Source:MGI Symbol:Acc:MGI:107654]                                                         |
| ENSMUSG000009704C  | AC140326.1    | 1.02 | 0.00 | 0.00 | -0.64 | 0.00 | 0.04 | -0.23 | 0.54 | 1.00 |                                                                                                                        |
| ENSMUSG000000596C  | Tuft1         | 1.52 | 0.00 | 0.00 | -0.63 | 0.00 | 0.00 | 0.17  | 0.39 | 1.00 | tufelin 1 [Source:MGI Symbol:Acc:MGI:109572]                                                                           |
| ENSMUSG0000005198  | Poi2a         | 1.01 | 0.00 | 0.00 | -0.63 | 0.00 | 0.00 | -0.11 | 0.48 | 1.00 | polymerase (RNA) II (DNA directed) polypeptide A [Source:MGI Symbol:Acc:MGI:98086]                                     |
| ENSMUSG0000020075  | Dobz2         | 0.89 | 0.00 | 0.00 | -0.63 | 0.00 | 0.00 | 0.10  | 0.61 | 1.00 | DEAD (Asp-Glu-Ala-Asp) box polypeptide 21 [Source:MGI Symbol:Acc:MGI:1860494]                                          |
| ENSMUSG000004143C  | Cnr11a        | 1.05 | 0.00 | 0.00 | -0.63 | 0.00 | 0.03 | 0.06  | 0.95 | 1.00 | cytochrome P-450, autosomal recessive 1A (human) [Source:MGI Symbol:Acc:MGI:1096573]                                   |
| ENSMUSG0000035951  | Mdn3          | 1.93 | 0.00 | 0.00 | -0.62 | 0.00 | 0.00 | -0.24 | 0.20 | 1.00 | midline 1 [Source:MGI Symbol:Acc:MGI:189222]                                                                           |
| ENSMUSG000002883C  | Ncdn          | 0.92 | 0.00 | 0.00 | -0.62 | 0.00 | 0.04 | -0.11 | 0.78 | 1.00 | neurochondrin [Source:MGI Symbol:Acc:MGI:1347351]                                                                      |
| ENSMUSG00000048572 | Tmem252       | 2.14 | 0.00 | 0.00 | -0.62 | 0.00 | 0.00 | -0.61 | 0.00 | 0.93 | transmembrane protein 252 [Source:MGI Symbol:Acc:MGI:3583948]                                                          |
| ENSMUSG0000018171  | Vmp1          | 1.32 | 0.00 | 0.00 | -0.62 | 0.00 | 0.00 | 0.01  | 0.94 | 1.00 | vacuole membrane protein 1 [Source:MGI Symbol:Acc:MGI:1923159]                                                         |
| ENSMUSG00000050335 | Lgals3        | 1.14 | 0.00 | 0.00 | -0.61 | 0.00 | 0.02 | -0.16 | 0.65 | 1.00 |                                                                                                                        |

|                    |            |      |      |      |       |      |      |       |      |      |                                                                                                                              |
|--------------------|------------|------|------|------|-------|------|------|-------|------|------|------------------------------------------------------------------------------------------------------------------------------|
| ENSMUSG00000021215 | Net1       | 1.03 | 0.00 | 0.00 | -0.51 | 0.00 | 0.00 | -0.04 | 0.78 | 1.00 | neuroepithelial cell transforming gene 1 [Source:MGI Symbol:Acc:MGI:1927138]                                                 |
| ENSMUSG0000004932  | Smcr8      | 0.81 | 0.00 | 0.00 | -0.51 | 0.00 | 0.02 | -0.07 | 0.74 | 1.00 | Smith-Magenis syndrome chromosome region, candidate 8 homolog (human) [Source:MGI Symbol:Acc:MGI:2444720]                    |
| ENSMUSG00000031691 | Npno2      | 0.73 | 0.00 | 0.00 | -0.51 | 0.00 | 0.03 | -0.09 | 0.68 | 1.00 | transporin 2 (importin 3, karyopherin beta 2b) [Source:MGI Symbol:Acc:MGI:2384849]                                           |
| ENSMUSG00000051391 | Ywhag      | 0.84 | 0.00 | 0.00 | -0.51 | 0.00 | 0.00 | 0.19  | 0.25 | 1.00 | tyrosine 3-monooxygenase/tryptophan 5-monooxygenase activation protein, gamma polypeptide [Source:MGI Symbol:Acc:MGI:108109] |
| ENSMUSG00000057561 | Ef1a1      | 0.89 | 0.00 | 0.00 | -0.50 | 0.00 | 0.02 | 0.07  | 0.74 | 1.00 | eukaryotic translation initiation factor 1A [Source:MGI Symbol:Acc:MGI:95298]                                                |
| ENSMUSG00000044468 | Fam160a2   | 0.99 | 0.00 | 0.00 | -0.50 | 0.00 | 0.01 | -0.01 | 1.00 | 1.00 | family with sequence similarity 160, member A2 [Source:MGI Symbol:Acc:MGI:1921599]                                           |
| ENSMUSG0000003662  | Mgat4b     | 0.86 | 0.00 | 0.00 | -0.50 | 0.00 | 0.00 | 0.00  | 1.00 | 1.00 | mannoside acetylglucosaminyltransferase 4, isoenzyme B [Source:MGI Symbol:Acc:MGI:2143974]                                   |
| ENSMUSG00000030905 | Aem        | 2.80 | 0.00 | 0.00 | -0.50 | 0.00 | 0.00 | 0.17  | 0.47 | 1.00 | apoptosis enhancing nuclease [Source:MGI Symbol:Acc:MGI:1915298]                                                             |
| ENSMUSG00000021815 | R2102P13Rk | 0.64 | 0.00 | 0.00 | -0.50 | 0.00 | 0.00 | -0.09 | 0.64 | 1.00 | RIKEN cDNA 231022P13 gene [Source:MGI Symbol:Acc:MGI:1919156]                                                                |
| ENSMUSG00000011877 | Gat1       | 0.73 | 0.00 | 0.00 | -0.50 | 0.00 | 0.01 | -0.12 | 0.53 | 1.00 | G protein-coupled receptor kinase-interactor 1 [Source:MGI Symbol:Acc:MGI:1927140]                                           |
| ENSMUSG0000001893  | Map2k3     | 0.94 | 0.00 | 0.00 | -0.49 | 0.00 | 0.02 | -0.09 | 0.74 | 1.00 | mitogen-activated protein kinase kinase 3 [Source:MGI Symbol:Acc:MGI:1346868]                                                |
| ENSMUSG0000001247  | Lsr        | 1.05 | 0.00 | 0.00 | -0.49 | 0.00 | 0.01 | -0.07 | 0.78 | 1.00 | lipolysis stimulated lipoprotein receptor [Source:MGI Symbol:Acc:MGI:1927471]                                                |
| ENSMUSG0000002127  | Hsp90aa1   | 1.05 | 0.00 | 0.00 | -0.49 | 0.00 | 0.00 | 0.23  | 0.07 | 1.00 | heat shock protein 90, alpha (cytosolic), class A member 1 [Source:MGI Symbol:Acc:MGI:96250]                                 |
| ENSMUSG0000002897  | Acbcb1b    | 2.12 | 0.00 | 0.00 | -0.49 | 0.00 | 0.02 | -0.72 | 0.03 | 1.00 | ATP-binding cassette, sub-family B (MDR/TAP), member 1B [Source:MGI Symbol:Acc:MGI:97568]                                    |
| ENSMUSG0000003639  | Gadd45a    | 0.65 | 0.00 | 0.00 | -0.49 | 0.00 | 0.03 | -0.05 | 0.81 | 1.00 | growth arrest and DNA-damage-inducible 45 alpha [Source:MGI Symbol:Acc:MGI:107799]                                           |
| ENSMUSG00000042745 | Id1        | 1.69 | 0.00 | 0.00 | -0.49 | 0.00 | 0.03 | -0.10 | 0.71 | 1.00 | inhibitor of DNA binding 1 [Source:MGI Symbol:Acc:MGI:96396]                                                                 |
| ENSMUSG0000002233  | Rhoc       | 1.08 | 0.00 | 0.00 | -0.48 | 0.00 | 0.00 | -0.11 | 0.54 | 1.00 | Ras homolog gene family, member C [Source:MGI Symbol:Acc:MGI:106028]                                                         |
| ENSMUSG0000003845  | Nqo1       | 2.34 | 0.00 | 0.00 | -0.48 | 0.00 | 0.00 | -0.14 | 0.54 | 1.00 | NAD(P)H dehydrogenase, quinone 1 [Source:MGI Symbol:Acc:MGI:103187]                                                          |
| ENSMUSG0000002528  | Sat1       | 1.00 | 0.00 | 0.00 | -0.48 | 0.00 | 0.00 | -0.02 | 0.89 | 1.00 | spermidine/spermine N1-acetyl transferase 1 [Source:MGI Symbol:Acc:MGI:98233]                                                |
| ENSMUSG0000002731  | Spint1     | 0.82 | 0.00 | 0.00 | -0.48 | 0.00 | 0.00 | -0.02 | 0.94 | 1.00 | serine protease inhibitor, Kunitz type 1 [Source:MGI Symbol:Acc:MGI:1338033]                                                 |
| ENSMUSG0000003416  | Irf2bp1    | 1.03 | 0.00 | 0.00 | -0.46 | 0.00 | 0.02 | -0.20 | 0.34 | 1.00 | interferon regulatory factor 2 binding protein-like [Source:MGI Symbol:Acc:MGI:2442463]                                      |
| ENSMUSG0000004015  | Tax1bp3    | 1.03 | 0.00 | 0.00 | -0.46 | 0.00 | 0.01 | 0.03  | 0.95 | 1.00 | Tax1 (human T cell leukemia virus type 1) binding protein 3 [Source:MGI Symbol:Acc:MGI:1923531]                              |
| ENSMUSG0000003163  | Irf3       | 1.62 | 0.00 | 0.00 | -0.45 | 0.00 | 0.01 | -0.13 | 0.57 | 1.00 | interferon gamma inducible protein 30 [Source:MGI Symbol:Acc:MGI:2137648]                                                    |
| ENSMUSG0000005148  | Cbr1       | 1.58 | 0.00 | 0.00 | -0.45 | 0.00 | 0.02 | -0.25 | 0.33 | 1.00 | carbonyl reductase 1 [Source:MGI Symbol:Acc:MGI:88284]                                                                       |
| ENSMUSG0000002085  | Lnc59      | 0.64 | 0.00 | 0.00 | -0.45 | 0.00 | 0.02 | 0.04  | 0.87 | 1.00 | leucine rich repeat containing 59 [Source:MGI Symbol:Acc:MGI:2138133]                                                        |
| ENSMUSG0000003373  | Sf3b3      | 0.64 | 0.00 | 0.00 | -0.45 | 0.00 | 0.03 | -0.04 | 0.86 | 1.00 | splicing factor 3b, subunit 3 [Source:MGI Symbol:Acc:MGI:1289341]                                                            |
| ENSMUSG0000003354  | Ahrgef5    | 0.91 | 0.00 | 0.00 | -0.45 | 0.00 | 0.00 | -0.01 | 0.96 | 1.00 | Rho guanine nucleotide exchange factor (GEF) 5 [Source:MGI Symbol:Acc:MGI:1858952]                                           |
| ENSMUSG00000025034 | Trim8      | 0.66 | 0.00 | 0.00 | -0.45 | 0.00 | 0.02 | 0.01  | 1.00 | 1.00 | tripartite motif-containing 8 [Source:MGI Symbol:Acc:MGI:1933302]                                                            |
| ENSMUSG00000025364 | Pa2g4      | 1.02 | 0.00 | 0.00 | -0.45 | 0.00 | 0.00 | 0.03  | 0.88 | 1.00 | proliferation-associated 2G4 [Source:MGI Symbol:Acc:MGI:894684]                                                              |
| ENSMUSG0000002958  | Actb       | 0.64 | 0.00 | 0.00 | -0.44 | 0.00 | 0.00 | -0.01 | 0.94 | 1.00 | actin, beta [Source:MGI Symbol:Acc:MGI:87904]                                                                                |
| ENSMUSG0000002761  | Ef6        | 1.04 | 0.00 | 0.00 | -0.44 | 0.00 | 0.00 | 0.05  | 0.80 | 1.00 | eukaryotic translation initiation factor 6 [Source:MGI Symbol:Acc:MGI:1196288]                                               |
| ENSMUSG0000006822  | Lgals1     | 2.02 | 0.00 | 0.00 | -0.44 | 0.00 | 0.02 | 0.27  | 0.30 | 1.00 | lectin, galactose binding, soluble 1 [Source:MGI Symbol:Acc:MGI:96777]                                                       |
| ENSMUSG0000004084  | Chmp2b     | 1.21 | 0.00 | 0.00 | -0.44 | 0.00 | 0.01 | 0.10  | 0.62 | 1.00 | charged multivesicular body protein 2B [Source:MGI Symbol:Acc:MGI:1916192]                                                   |
| ENSMUSG00000030084 | Pknox1     | 1.34 | 0.00 | 0.00 | -0.44 | 0.00 | 0.04 | 0.01  | 1.00 | 1.00 | plexin A1 [Source:MGI Symbol:Acc:MGI:107685]                                                                                 |
| ENSMUSG00000007041 | Clic1      | 1.22 | 0.00 | 0.00 | -0.44 | 0.00 | 0.00 | 0.09  | 0.55 | 1.00 | chloride intracellular channel 1 [Source:MGI Symbol:Acc:MGI:2148924]                                                         |
| ENSMUSG0000002551  | Cd151      | 1.11 | 0.00 | 0.00 | -0.44 | 0.00 | 0.00 | -0.03 | 0.89 | 1.00 | CD151 antigen [Source:MGI Symbol:Acc:MGI:1096360]                                                                            |
| ENSMUSG0000002943  | Ran        | 0.89 | 0.00 | 0.00 | -0.44 | 0.00 | 0.00 | 0.11  | 0.43 | 1.00 | RAN, member RAS oncogene family [Source:MGI Symbol:Acc:MGI:1333112]                                                          |
| ENSMUSG0000006166  | Cd2ap      | 0.93 | 0.00 | 0.00 | -0.43 | 0.00 | 0.00 | 0.00  | 1.00 | 1.00 | CD2-associated protein [Source:MGI Symbol:Acc:MGI:1330281]                                                                   |
| ENSMUSG00000020307 | Cdc34      | 1.31 | 0.00 | 0.00 | -0.43 | 0.00 | 0.03 | 0.13  | 0.57 | 1.00 | cell division cycle 34 [Source:MGI Symbol:Acc:MGI:102657]                                                                    |
| ENSMUSG0000003023  | Aebp2      | 0.80 | 0.00 | 0.00 | -0.43 | 0.00 | 0.02 | -0.16 | 0.36 | 1.00 | AE binding protein 2 [Source:MGI Symbol:Acc:MGI:1338038]                                                                     |
| ENSMUSG00000029304 | Syp1       | 1.27 | 0.00 | 0.00 | -0.43 | 0.00 | 0.02 | -0.08 | 0.45 | 1.00 | secreted phosphoprotein 1 [Source:MGI Symbol:Acc:MGI:98398]                                                                  |
| ENSMUSG0000005879  | Nap115     | 0.79 | 0.00 | 0.00 | -0.43 | 0.00 | 0.00 | 0.10  | 0.46 | 1.00 | nucleosome assembly protein 1-like 1 [Source:MGI Symbol:Acc:MGI:1955693]                                                     |
| ENSMUSG0000001876  | Fxr2       | 0.64 | 0.00 | 0.00 | -0.42 | 0.00 | 0.03 | 0.03  | 0.87 | 1.00 | fragile X mental retardation, autosomal homolog 2 [Source:MGI Symbol:Acc:MGI:1346074]                                        |
| ENSMUSG0000002782  | AW555464   | 1.34 | 0.00 | 0.00 | -0.42 | 0.00 | 0.00 | -0.01 | 1.00 | 1.00 | expressed sequence AW555464 [Source:MGI Symbol:Acc:MGI:2145043]                                                              |
| ENSMUSG0000001895  | Ywhah      | 0.91 | 0.00 | 0.00 | -0.42 | 0.00 | 0.01 | -0.11 | 0.58 | 1.00 | tyrosine 3-monooxygenase/tryptophan 5-monooxygenase activation protein, eta polypeptide [Source:MGI Symbol:Acc:MGI:109194]   |
| ENSMUSG0000002045  | Rtn4       | 0.71 | 0.00 | 0.00 | -0.42 | 0.00 | 0.01 | -0.04 | 0.82 | 1.00 | reticulon 4 [Source:MGI Symbol:Acc:MGI:1915835]                                                                              |
| ENSMUSG0000003140  | Mpp1       | 1.38 | 0.00 | 0.00 | -0.42 | 0.00 | 0.00 | 0.07  | 0.62 | 1.00 | membrane protein, palmitoylated [Source:MGI Symbol:Acc:MGI:105941]                                                           |
| ENSMUSG0000008005  | Gm11175    | 0.92 | 0.00 | 0.00 | -0.42 | 0.00 | 0.04 | -0.03 | 0.90 | 1.00 | predicted gene 11175 [Source:MGI Symbol:Acc:MGI:3809055]                                                                     |
| ENSMUSG0000000562  | Psmf4      | 0.67 | 0.00 | 0.00 | -0.42 | 0.00 | 0.01 | -0.03 | 0.86 | 1.00 | proteasome (prosome, macropain) 26S subunit, non-ATPase, 4 [Source:MGI Symbol:Acc:MGI:1201670]                               |
| ENSMUSG0000002430  | Tapbp      | 0.83 | 0.00 | 0.00 | -0.41 | 0.00 | 0.02 | -0.03 | 0.88 | 1.00 | TAP binding protein [Source:MGI Symbol:Acc:MGI:1201689]                                                                      |
| ENSMUSG0000002193  | Ctsb       | 0.85 | 0.00 | 0.00 | -0.41 | 0.00 | 0.00 | -0.07 | 0.36 | 1.00 | cathepsin B [Source:MGI Symbol:Acc:MGI:88561]                                                                                |
| ENSMUSG0000002642  | Arl8a      | 0.85 | 0.00 | 0.00 | -0.41 | 0.00 | 0.02 | -0.10 | 0.63 | 1.00 | ADP-ribosylation factor-like 8A [Source:MGI Symbol:Acc:MGI:1915974]                                                          |
| ENSMUSG0000003904  | Adrm1      | 0.53 | 0.00 | 0.00 | -0.41 | 0.00 | 0.01 | 0.07  | 0.69 | 1.00 | adhesion regulating molecule 1 [Source:MGI Symbol:Acc:MGI:1929289]                                                           |
| ENSMUSG00000026234 | Ncl        | 0.74 | 0.00 | 0.00 | -0.41 | 0.00 | 0.00 | 0.14  | 0.18 | 1.00 | nucleolin [Source:MGI Symbol:Acc:MGI:97286]                                                                                  |
| ENSMUSG0000002029  | Xpo1       | 1.03 | 0.00 | 0.00 | -0.40 | 0.00 | 0.02 | -0.15 | 0.44 | 1.00 | exportin 1, CRM1 homolog (yeast) [Source:MGI Symbol:Acc:MGI:2144013]                                                         |
| ENSMUSG0000003823  | F11r       | 0.77 | 0.00 | 0.00 | -0.40 | 0.00 | 0.01 | -0.07 | 0.69 | 1.00 | F11 receptor [Source:MGI Symbol:Acc:MGI:1321398]                                                                             |
| ENSMUSG0000005122  | Bzw1       | 0.63 | 0.00 | 0.00 | -0.40 | 0.00 | 0.00 | 0.02  | 0.90 | 1.00 | basic leucine zipper and W2 domains 1 [Source:MGI Symbol:Acc:MGI:1914132]                                                    |
| ENSMUSG0000004592  | Gm8399     | 0.53 | 0.00 | 0.00 | -0.40 | 0.00 | 0.01 | -0.12 | 0.44 | 1.00 | predicted gene 8399 [Source:MGI Symbol:Acc:MGI:2652817]                                                                      |
| ENSMUSG00000021477 | Cst1       | 0.84 | 0.00 | 0.00 | -0.40 | 0.00 | 0.00 | -0.02 | 0.82 | 1.00 | cathepsin L [Source:MGI Symbol:Acc:MGI:88564]                                                                                |
| ENSMUSG0000003196  | Aars       | 0.74 | 0.00 | 0.00 | -0.40 | 0.00 | 0.00 | -0.04 | 0.81 | 1.00 | alanyl-tRNA synthetase [Source:MGI Symbol:Acc:MGI:2384560]                                                                   |
| ENSMUSG0000002877  | Tinag1     | 1.40 | 0.00 | 0.00 | -0.40 | 0.00 | 0.04 | -0.03 | 0.94 | 1.00 | tubulointerstitial nephritis antigen-like 1 [Source:MGI Symbol:Acc:MGI:2137617]                                              |
| ENSMUSG0000001992  | Zwint      | 0.70 | 0.00 | 0.00 | -0.40 | 0.00 | 0.01 | -0.09 | 0.57 | 1.00 | ZW10 interactor [Source:MGI Symbol:Acc:MGI:1289227]                                                                          |
| ENSMUSG0000003254  | Ahd5       | 1.09 | 0.00 | 0.00 | -0.39 | 0.00 | 0.04 | 0.17  | 0.36 | 1.00 | abhydrolase domain containing 5 [Source:MGI Symbol:Acc:MGI:1914719]                                                          |
| ENSMUSG0000007523  | Amd1       | 0.51 | 0.00 | 0.00 | -0.39 | 0.00 | 0.04 | 0.08  | 0.65 | 1.00 | S-adenosylmethionine decarboxylase 1 [Source:MGI Symbol:Acc:MGI:88004]                                                       |
| ENSMUSG0000002244  | Myl9       | 0.80 | 0.00 | 0.00 | -0.39 | 0.00 | 0.00 | 0.00  | 1.00 | 1.00 | myosin, heavy polypeptide 9, non-muscle [Source:MGI Symbol:Acc:MGI:107717]                                                   |
| ENSMUSG0000004071  | Creg1      | 0.82 | 0.00 | 0.00 | -0.39 | 0.00 | 0.04 | -0.16 | 0.40 | 1.00 | cellular repressor of E1A-stimulated genes 1 [Source:MGI Symbol:Acc:MGI:1344382]                                             |
| ENSMUSG0000001742  | Psmf11     | 0.71 | 0.00 | 0.00 | -0.39 | 0.00 | 0.03 | 0.06  | 0.74 | 1.00 | proteasome (prosome, macropain) 26S subunit, non-ATPase, 11 [Source:MGI Symbol:Acc:MGI:1916327]                              |
| ENSMUSG0000000854  | Mgst1      | 2.19 | 0.00 | 0.00 | -0.38 | 0.00 | 0.00 | -0.48 | 0.02 | 1.00 | microsomal glutathione S-transferase 1 [Source:MGI Symbol:Acc:MGI:1913850]                                                   |
| ENSMUSG0000002103  | Splc2      | 1.12 | 0.00 | 0.00 | -0.38 | 0.00 | 0.00 | -0.09 | 0.52 | 1.00 | serine palmitoyltransferase, long chain base subunit 2 [Source:MGI Symbol:Acc:MGI:108074]                                    |
| ENSMUSG0000002061  | Gna13      | 0.97 | 0.00 | 0.00 | -0.37 | 0.00 | 0.01 | -0.09 | 0.59 | 1.00 | guanine nucleotide binding protein, alpha 13 [Source:MGI Symbol:Acc:MGI:95768]                                               |
| ENSMUSG0000002898  | Sees2      | 1.55 | 0.00 | 0.00 | -0.37 | 0.00 | 0.02 | -0.41 | 0.05 | 1.00 | sestrin 2 [Source:MGI Symbol:Acc:MGI:2651874]                                                                                |
| ENSMUSG0000007341  | H2-D1      | 0.42 | 0.00 | 0.00 | -0.37 | 0.00 | 0.00 | 0.00  | 1.00 | 1.00 | histocompatibility 2, D region locus 1 [Source:MGI Symbol:Acc:MGI:95896]                                                     |
| ENSMUSG0000004594  | Mmmr1      | 1.06 | 0.00 | 0.00 | -0.37 | 0.00 | 0.01 | -0.06 | 0.69 | 1.00 | myotubularin related protein 11 [Source:MGI Symbol:Acc:MGI:2652817]                                                          |
| ENSMUSG0000001596  | Ades1      | 0.76 | 0.00 | 0.00 | -0.37 | 0.00 | 0.01 | 0.11  | 0.48 | 1.00 | adenylosuccinate synthetase, non-muscle [Source:MGI Symbol:Acc:MGI:87948]                                                    |
| ENSMUSG0000003836  | Lasp1      | 0.68 | 0.00 | 0.00 | -0.37 | 0.00 | 0.00 | -0.03 | 0.79 | 1.00 | LIM and SH3 protein 1 [Source:MGI Symbol:Acc:MGI:109856]                                                                     |
| ENSMUSG0000002635  | Ubxm4      | 0.66 | 0.00 | 0.00 | -0.37 | 0.00 | 0.03 | 0.10  | 0.54 | 1.00 | UBX domain protein 4 [Source:MGI Symbol:Acc:MGI:1915062]                                                                     |
| ENSMUSG0000000698  | Psmf2      | 0.63 | 0.00 | 0.00 | -0.37 | 0.00 | 0.00 | 0.05  | 0.67 | 1.00 | proteasome (prosome, macropain) 26S subunit, non-ATPase, 2 [Source:MGI Symbol:Acc:MGI:1096584]                               |
| ENSMUSG0000005113  | Npm1       | 0.71 | 0.00 | 0.00 | -0.36 | 0.00 | 0.   |       |      |      |                                                                                                                              |

Sup. Table 1 SET III

| ENSEMBL            | Symbol        | CP versus Sal |        |      | CP versus CP+DCA |        |      | DCA versus Sal |        |      | Desc                                                                                  |
|--------------------|---------------|---------------|--------|------|------------------|--------|------|----------------|--------|------|---------------------------------------------------------------------------------------|
|                    |               | logFC         | PValue | FDR  | logFC            | PValue | FDR  | logFC          | PValue | FDR  |                                                                                       |
| ENSMUSG00000064346 | mt-Tw         | -1.97         | 0.00   | 0.00 | -1.59            | 0.00   | 0.00 | 0.13           | 0.82   | 1.00 | mitochondrially encoded tRNA tryptophan [Source:MGI Symbol;Acc:MGI:102471]            |
| ENSMUSG00000020641 | Rsad2         | 0.67          | 0.02   | 0.11 | -0.91            | 0.00   | 0.03 | -0.03          | 1.00   | 1.00 | radical S-adenosyl methionine domain containing 2 [Source:MGI Symbol;Acc:MGI:1929628] |
| ENSMUSG00000057137 | Tmem140       | 0.37          | 0.03   | 0.17 | -0.74            | 0.00   | 0.00 | -0.17          | 0.41   | 1.00 | transmembrane protein 140 [Source:MGI Symbol;Acc:MGI:1915737]                         |
| ENSMUSG00000046806 | 3110062M04Rik | 0.35          | 0.05   | 0.23 | -0.67            | 0.00   | 0.00 | -0.17          | 0.43   | 1.00 | RIKEN cDNA 3110062M04 gene [Source:MGI Symbol;Acc:MGI:1925662]                        |
| ENSMUSG00000019132 | BC005537      | 0.16          | 0.12   | 0.47 | -0.42            | 0.00   | 0.00 | 0.01           | 0.94   | 1.00 | cDNA sequence BC005537 [Source:MGI Symbol;Acc:MGI:2441726]                            |
| ENSMUSG00000006273 | Atp6v1b2      | 0.16          | 0.05   | 0.26 | -0.35            | 0.00   | 0.00 | -0.02          | 0.85   | 1.00 | ATPase, H+ transporting, lysosomal V1 subunit B2 [Source:MGI Symbol;Acc:MGI:109618]   |
| ENSMUSG00000075602 | Ly6a          | 0.27          | 0.01   | 0.07 | -0.30            | 0.00   | 0.01 | 0.10           | 0.36   | 1.00 | lymphocyte antigen 6 complex, locus A [Source:MGI Symbol;Acc:MGI:107527]              |
| ENSMUSG00000002985 | ApoE          | -0.36         | 0.00   | 0.01 | -0.44            | 0.00   | 0.01 | -0.71          | 0.00   | 0.00 | apolipoprotein E [Source:MGI Symbol;Acc:MGI:88057]                                    |

Sup. Table 1 SET IV

| ENSEMBL            | Symbol        | CP versus Sal |        |      | CP versus CP+DCA |        |      | DCA versus Sal |        |      | Desc                                                                                             |
|--------------------|---------------|---------------|--------|------|------------------|--------|------|----------------|--------|------|--------------------------------------------------------------------------------------------------|
|                    |               | logFC         | PValue | FDR  | logFC            | PValue | FDR  | logFC          | PValue | FDR  |                                                                                                  |
| ENSMUSG00000084058 | Gm15263       | -6.58         | 0.00   | 0.00 | 0.19             | 1.00   | 1.00 | -5.49          | 0.00   | 0.00 | predicted gene 15263 [Source:MG Symbol;Acc:MG:3705753]                                           |
| ENSMUSG00000087720 | U6            | -5.56         | 0.00   | 0.00 | 0.47             | 1.00   | 1.00 | -5.01          | 0.00   | 0.00 | U6 spliceosomal RNA [Source:RFAM;Acc:RF00026]                                                    |
| ENSMUSG00000081355 | Gm15264       | -1.47         | 0.00   | 0.03 | -0.59            | 0.21   | 1.00 | -2.74          | 0.00   | 0.03 | predicted gene 15264 [Source:MG Symbol;Acc:MG:3705845]                                           |
| ENSMUSG0000005268  | Prlr          | -1.11         | 0.00   | 0.00 | -0.49            | 0.13   | 0.96 | -1.39          | 0.00   | 0.00 | prolactin receptor [Source:MG Symbol;Acc:MG:97763]                                               |
| ENSMUSG00000068876 | Cgn           | 1.11          | 0.00   | 0.00 | -0.74            | 0.00   | 0.00 | -0.89          | 0.00   | 0.03 | cingulin [Source:MG Symbol;Acc:MG:1927237]                                                       |
| ENSMUSG00000030359 | Pzp           | -2.80         | 0.00   | 0.00 | -0.06            | 0.87   | 1.00 | -0.79          | 0.00   | 0.00 | pregnancy zone protein [Source:MG Symbol;Acc:MG:87854]                                           |
| ENSMUSG00000002985 | ApoE          | -0.36         | 0.00   | 0.01 | -0.44            | 0.00   | 0.01 | -0.71          | 0.00   | 0.00 | apolipoprotein E [Source:MG Symbol;Acc:MG:88057]                                                 |
| ENSMUSG00000055137 | 5033411D12Rik | -1.35         | 0.00   | 0.00 | -0.38            | 0.01   | 0.13 | -0.63          | 0.00   | 0.00 | RIKEN cDNA 5033411D12 gene [Source:MG Symbol;Acc:MG:1923221]                                     |
| ENSMUSG00000022445 | Cyp2d26       | -0.30         | 0.01   | 0.08 | 0.31             | 0.00   | 0.08 | -0.61          | 0.00   | 0.01 | cytochrome P450, family 2, subfamily d, polypeptide 26 [Source:MG Symbol;Acc:MG:1923529]         |
| ENSMUSG00000063796 | Slc22a8       | -1.57         | 0.00   | 0.00 | 0.86             | 0.00   | 0.00 | -0.55          | 0.00   | 0.02 | solute carrier family 22 (organic anion transporter), member 8 [Source:MG Symbol;Acc:MG:1336187] |
| ENSMUSG00000070348 | Ccnd1         | -1.72         | 0.00   | 0.00 | 0.58             | 0.00   | 0.00 | -0.44          | 0.00   | 0.03 | cyclin D1 [Source:MG Symbol;Acc:MG:88313]                                                        |
| ENSMUSG00000029455 | Aldh2         | -0.31         | 0.00   | 0.00 | 0.16             | 0.01   | 0.14 | -0.31          | 0.00   | 0.05 | aldehyde dehydrogenase 2, mitochondrial [Source:MG Symbol;Acc:MG:99600]                          |

Sup. Table 1 SET V

| ENSEMBL             | Symbol        | CP vs. Sal |        |      | CP vs. CP+DCA |        |       | DCA vs Sal |        |      | Description                                                                                                               |
|---------------------|---------------|------------|--------|------|---------------|--------|-------|------------|--------|------|---------------------------------------------------------------------------------------------------------------------------|
|                     |               | logFC      | PValue | FDR  | logFC         | PValue | FDR   | logFC      | PValue | FDR  |                                                                                                                           |
| ENSMUSG00000028017  | Egf           | -2.81      | 0.00   | 0.00 | 0.27          | 0.14   | 0.00  | 0.27       | 0.14   | 0.00 | epidermal growth factor [Source:MGJ Symbol:Acc:MGJ:95290]                                                                 |
| ENSMUSG00000038224  | Serpinf2      | -1.84      | 0.00   | 0.00 | -0.35         | 0.01   | 0.11  | -0.09      | 0.32   | 1.00 | serine (or cysteine) peptidase inhibitor, clade F, member 2 [Source:MGJ Symbol:Acc:MGJ:107173]                            |
| ENSMUSG00000001467  | Cyp51         | -2.38      | 0.00   | 0.00 | 0.42          | 0.01   | 0.18  | 0.04       | 0.75   | 1.00 | cytochrome P450, family 5 [Source:MGJ Symbol:Acc:MGJ:106040]                                                              |
| ENSMUSG00000000793  | Prp9          | -0.87      | 0.00   | 0.00 | 0.39          | 0.01   | 0.15  | -0.79      | 0.87   | 1.00 | pregnancy zone protein [Source:MGJ Symbol:Acc:MGJ:81000]                                                                  |
| ENSMUSG00000008750  | Gm15396       | -1.23      | 0.00   | 0.00 | 0.20          | 0.01   | 0.15  | -0.19      | 0.01   | 1.00 | predicted gene 15396 [Source:MGJ Symbol:Acc:MGJ:3705202]                                                                  |
| ENSMUSG00000004843  | Atm1          | -3.53      | 0.00   | 0.00 | 0.76          | 0.04   | 0.41  | 0.24       | 0.08   | 1.00 | attractin like 1 [Source:MGJ Symbol:Acc:MGJ:2147749]                                                                      |
| ENSMUSG00000004160  | Pcca          | -2.37      | 0.00   | 0.00 | 0.44          | 0.02   | 0.30  | -0.16      | 0.18   | 1.00 | propionyl-Coenzyme A carboxylase, alpha polypeptide [Source:MGJ Symbol:Acc:MGJ:97499]                                     |
| ENSMUSG00000003943  | Slc9a8        | -2.11      | 0.00   | 0.00 | 0.34          | 0.02   | 0.31  | 0.05       | 0.73   | 1.00 | solute carrier family 9 (sodium/hydrogen exchanger), member 8 [Source:MGJ Symbol:Acc:MGJ:1924281]                         |
| ENSMUSG00000004668  | Abca13        | -2.45      | 0.00   | 0.00 | 0.10          | 0.76   | 1.00  | -0.11      | 0.45   | 1.00 | ATP-binding cassette, sub-family A (ABC1), member 13 [Source:MGJ Symbol:Acc:MGJ:2388707]                                  |
| ENSMUSG000000026417 | Pgr           | -1.40      | 0.00   | 0.00 | 0.16          | 0.08   | 0.70  | -0.57      | 0.00   | 0.24 | polymeric immunoglobulin receptor [Source:MGJ Symbol:Acc:MGJ:103080]                                                      |
| ENSMUSG000000034897 | Fras1         | -2.57      | 0.00   | 0.00 | 0.64          | 0.03   | 0.59  | 0.07       | 0.43   | 1.00 | trafficking protein particle complex 9 [Source:MGJ Symbol:Acc:MGJ:1923760]                                                |
| ENSMUSG00000003308  | Dpyf          | -1.58      | 0.00   | 0.00 | 0.20          | 0.59   | 1.00  | -0.36      | 0.02   | 1.00 | dihydroxyproline dehydrogenase [Source:MGJ Symbol:Acc:MGJ:2139667]                                                        |
| ENSMUSG00000007504  | Slc22a29      | -3.98      | 0.00   | 0.00 | 0.89          | 0.14   | 1.00  | -0.40      | 0.11   | 1.00 | solute carrier family 22, member 29 [Source:MGJ Symbol:Acc:MGJ:3605624]                                                   |
| ENSMUSG00000002638  | F13b          | -2.04      | 0.00   | 0.00 | 0.54          | 0.01   | 0.12  | -0.36      | 0.01   | 1.00 | coagulation factor XIII, beta subunit [Source:MGJ Symbol:Acc:MGJ:88379]                                                   |
| ENSMUSG00000002081  | Ace           | -1.46      | 0.00   | 0.00 | 0.29          | 0.03   | 0.36  | -0.03      | 0.78   | 1.00 | angiotensin I converting enzyme (peptidyl-dipeptidase A) 1 [Source:MGJ Symbol:Acc:MGJ:87874]                              |
| ENSMUSG00000003306  | Lpp           | -2.22      | 0.00   | 0.00 | 0.36          | 0.15   | 1.00  | 0.21       | 0.14   | 1.00 | LIM domain containing preferred translocation partner in lipoma [Source:MGJ Symbol:Acc:MGJ:2441849]                       |
| ENSMUSG00000003826  | Car14         | -2.15      | 0.00   | 0.00 | 0.50          | 0.03   | 0.34  | -0.32      | 0.03   | 1.00 | carbonic anhydrase 14 [Source:MGJ Symbol:Acc:MGJ:1344341]                                                                 |
| ENSMUSG000000034897 | Fras1         | -2.57      | 0.00   | 0.00 | 0.64          | 0.03   | 0.59  | 0.07       | 0.68   | 1.00 | Fraser syndrome 1 homolog (human) [Source:MGJ Symbol:Acc:MGJ:2385368]                                                     |
| ENSMUSG000000032758 | Fras1         | -1.39      | 0.00   | 0.00 | 0.34          | 0.00   | 0.06  | 0.24       | 0.00   | 0.51 | kidney androgen regulated protein [Source:MGJ Symbol:Acc:MGJ:36653]                                                       |
| ENSMUSG00000004359  | mt-Tg         | -5.17      | 0.00   | 0.00 | 0.18          | 0.86   | 1.00  | -1.16      | 0.03   | 1.00 | mitochondrially encoded tRNA glycine [Source:MGJ Symbol:Acc:MGJ:102486]                                                   |
| ENSMUSG00000003290  | Apeh          | -1.22      | 0.00   | 0.00 | 0.29          | 0.01   | 0.12  | 0.01       | 0.90   | 1.00 | acylpeptide hydrolase [Source:MGJ Symbol:Acc:MGJ:88041]                                                                   |
| ENSMUSG00000002545  | Cybl          | -2.40      | 0.00   | 0.00 | 0.65          | 0.02   | 0.27  | -0.02      | 0.93   | 1.00 | citrate lyase beta like [Source:MGJ Symbol:Acc:MGJ:1916884]                                                               |
| ENSMUSG000000021416 | Eoc3          | -1.58      | 0.00   | 0.00 | 0.32          | 0.04   | 0.41  | 0.09       | 0.45   | 1.00 | enoyl-Coenzyme A delta isomerase 3 [Source:MGJ Symbol:Acc:MGJ:1916637]                                                    |
| ENSMUSG00000006361  | mt-T          | -4.96      | 0.00   | 0.00 | 1.00          | 1.00   | -1.12 | 0.04       | 1.00   | 1.00 | mitochondrially encoded tRNA arginine [Source:MGJ Symbol:Acc:MGJ:102476]                                                  |
| ENSMUSG000000032721 | 503p411D12Rik | -1.30      | 0.00   | 0.00 | -0.39         | 0.01   | 0.16  | -0.63      | 0.00   | 0.00 | Riken cDNA 503p411D12 gene [Source:MGJ Symbol:Acc:MGJ:192321]                                                             |
| ENSMUSG00000004210  | Dmgth         | -1.48      | 0.00   | 0.00 | 0.37          | 0.01   | 0.16  | 0.43       | 0.02   | 1.00 | dimethylglycine dehydrogenase precursor [Source:MGJ Symbol:Acc:MGJ:1921379]                                               |
| ENSMUSG00000002629  | Sgp2          | -2.02      | 0.00   | 0.00 | 0.42          | 0.05   | 0.54  | -0.12      | 0.41   | 1.00 | secreted phosphoprotein 2 [Source:MGJ Symbol:Acc:MGJ:1922646]                                                             |
| ENSMUSG000000085711 | Gm15163       | -1.74      | 0.00   | 0.00 | 0.45          | 0.01   | 0.21  | -0.25      | 0.07   | 1.00 | predicted gene 15163 [Source:MGJ Symbol:Acc:MGJ:3642430]                                                                  |
| ENSMUSG000000001424 | Snd1          | -2.62      | 0.00   | 0.00 | 0.57          | 0.11   | 0.87  | 0.03       | 0.88   | 1.00 | staphylococcal nuclease and tudor domain containing 1 [Source:MGJ Symbol:Acc:MGJ:1929266]                                 |
| ENSMUSG000000023951 | Vegfa         | -1.13      | 0.00   | 0.00 | 0.25          | 0.02   | 0.26  | -0.15      | 0.14   | 1.00 | vascular endothelial growth factor A [Source:MGJ Symbol:Acc:MGJ:103178]                                                   |
| ENSMUSG000000021745 | Ptprg         | -2.70      | 0.00   | 0.00 | 0.47          | 0.27   | 1.00  | 0.04       | 0.83   | 1.00 | protein tyrosine phosphatase, receptor type, G [Source:MGJ Symbol:Acc:MGJ:97814]                                          |
| ENSMUSG000000029482 | Aux1          | -1.00      | 0.00   | 0.00 | 0.39          | 0.01   | 0.11  | -0.27      | 0.11   | 1.00 | N-acetyltransferase 8B [Source:MGJ Symbol:Acc:MGJ:3644481]                                                                |
| ENSMUSG000000014230 | Fars2         | -3.22      | 0.00   | 0.00 | 0.97          | 0.03   | 0.32  | 0.05       | 0.85   | 1.00 | phenylalanine-tRNA synthetase 2 (mitochondrial) [Source:MGJ Symbol:Acc:MGJ:1917205]                                       |
| ENSMUSG000000039007 | Pgcp          | -1.95      | 0.00   | 0.00 | 0.07          | 0.87   | 1.00  | -0.17      | 0.28   | 1.00 | plasma glutamate carboxypeptidase [Source:MGJ Symbol:Acc:MGJ:1889205]                                                     |
| ENSMUSG000000028080 | LrbA          | -1.82      | 0.00   | 0.00 | 0.37          | 0.09   | 0.75  | 0.04       | 0.85   | 1.00 | LPS-responsive beige-like anchor [Source:MGJ Symbol:Acc:MGJ:1933162]                                                      |
| ENSMUSG000000063436 | mt-Th         | -4.03      | 0.00   | 0.00 | -0.08         | 0.90   | 1.00  | -0.67      | 0.10   | 1.00 | mitochondrially encoded tRNA histidine [Source:MGJ Symbol:Acc:MGJ:102485]                                                 |
| ENSMUSG000000048911 | Rnl24         | -2.01      | 0.00   | 0.00 | 0.34          | 0.10   | 0.80  | 0.78       | 0.00   | 0.07 | ring finger protein 24 [Source:MGJ Symbol:Acc:MGJ:1261771]                                                                |
| ENSMUSG000000029705 | Cux1          | -1.37      | 0.00   | 0.00 | 0.29          | 0.06   | 0.58  | -0.10      | 0.41   | 1.00 | cut-like homeobox 1 [Source:MGJ Symbol:Acc:MGJ:88586]                                                                     |
| ENSMUSG000000029482 | Aux1          | -1.70      | 0.00   | 0.00 | 0.25          | 0.15   | 1.00  | 0.32       | 0.11   | 1.00 | acetylacetyl-CoA synthetase [Source:MGJ Symbol:Acc:MGJ:1926144]                                                           |
| ENSMUSG000000029728 | Lbr1          | -1.43      | 0.00   | 0.00 | 0.35          | 0.15   | 0.80  | 0.16       | 0.54   | 1.00 | carbonic anhydrase 4 [Source:MGJ Symbol:Acc:MGJ:2442264]                                                                  |
| ENSMUSG000000043635 | mt-Ts2        | -3.79      | 0.00   | 0.00 | -0.12         | 0.83   | 1.00  | -0.64      | 0.12   | 1.00 | mitochondrially encoded tRNA serine 2 [Source:MGJ Symbol:Acc:MGJ:102474]                                                  |
| ENSMUSG000000030963 | Umod          | -1.11      | 0.00   | 0.00 | 0.09          | 0.51   | 1.00  | -0.15      | 0.06   | 1.00 | uromodulin [Source:MGJ Symbol:Acc:MGJ:102674]                                                                             |
| ENSMUSG000000043635 | mt-Tk         | -5.41      | 0.00   | 0.00 | 0.04          | 1.00   | 1.00  | -0.23      | 0.67   | 1.00 | mitochondrially encoded tRNA lysine [Source:MGJ Symbol:Acc:MGJ:102483]                                                    |
| ENSMUSG000000097815 | AC136215.1    | -0.91      | 0.00   | 0.00 | -0.07         | 0.44   | 1.00  | 0.01       | 0.97   | 1.00 | 0                                                                                                                         |
| ENSMUSG000000046876 | Abn1          | -2.92      | 0.00   | 0.00 | 1.20          | 0.00   | 0.05  | -0.34      | 0.21   | 1.00 | ataxin 1 [Source:MGJ Symbol:Acc:MGJ:104783]                                                                               |
| ENSMUSG000000026415 | Fcrl1         | -2.80      | 0.00   | 0.00 | 0.81          | 0.05   | 0.50  | -0.26      | 0.10   | 1.00 | Fc receptor, IgA, IgM, high affinity [Source:MGJ Symbol:Acc:MGJ:1927803]                                                  |
| ENSMUSG000000029728 | Lbr1          | -2.19      | 0.00   | 0.00 | 0.63          | 0.06   | 0.62  | 0.14       | 0.43   | 1.00 | Fc epsilon receptor 1-like [Source:MGJ Symbol:Acc:MGJ:1362507]                                                            |
| ENSMUSG000000037646 | Vps13b        | -2.52      | 0.00   | 0.00 | 0.54          | 0.15   | 1.00  | -0.03      | 0.86   | 1.00 | vacuolar protein sorting 13B (yeast) [Source:MGJ Symbol:Acc:MGJ:1916300]                                                  |
| ENSMUSG000000024357 | Sl1           | -2.97      | 0.00   | 0.00 | 0.90          | 0.04   | 0.44  | -0.03      | 0.95   | 1.00 | endoplasmic reticulum chaperone SIL1 homolog (S. cerevisiae) [Source:MGJ Symbol:Acc:MGJ:1932040]                          |
| ENSMUSG000000021665 | Hexb          | -1.00      | 0.00   | 0.00 | 0.15          | 0.14   | 1.00  | -0.19      | 0.07   | 1.00 | hexosaminidase B [Source:MGJ Symbol:Acc:MGJ:96074]                                                                        |
| ENSMUSG000000064353 | mt-Td         | -5.24      | 0.00   | 0.00 | -1.32         | 0.04   | 0.47  | 0.18       | 0.73   | 1.00 | mitochondrially encoded tRNA aspartic acid [Source:MGJ Symbol:Acc:MGJ:102489]                                             |
| ENSMUSG000000028976 | Slc2a5        | -1.79      | 0.00   | 0.00 | 0.64          | 0.00   | 0.08  | -0.39      | 0.02   | 1.00 | solute carrier family 2 (facilitated glucose transporter), member 5 [Source:MGJ Symbol:Acc:MGJ:1928369]                   |
| ENSMUSG000000060459 | Kng2          | -1.00      | 0.00   | 0.00 | 0.21          | 0.07   | 0.65  | -0.11      | 0.31   | 1.00 | kininogen 2 [Source:MGJ Symbol:Acc:MGJ:3027157]                                                                           |
| ENSMUSG000000029728 | Lbr1          | -1.58      | 0.00   | 0.00 | 0.63          | 0.01   | 0.11  | -0.27      | 0.54   | 1.00 | carbonic anhydrase 4 [Source:MGJ Symbol:Acc:MGJ:1096574]                                                                  |
| ENSMUSG000000043760 | Pkhd1         | -1.28      | 0.00   | 0.00 | 0.40          | 0.01   | 0.12  | -0.11      | 0.42   | 1.00 | polycystic kidney and hepatic disease 1 [Source:MGJ Symbol:Acc:MGJ:2155808]                                               |
| ENSMUSG000000039304 | Tmf10         | -1.73      | 0.00   | 0.00 | 0.39          | 0.09   | 0.74  | 0.25       | 0.10   | 1.00 | tumor necrosis factor (ligand) superfamily, member 10 [Source:MGJ Symbol:Acc:MGJ:107414]                                  |
| ENSMUSG000000043636 | mt-T2         | -3.38      | 0.00   | 0.00 | -0.31         | 0.29   | 1.00  | -0.59      | 0.15   | 1.00 | mitochondrially encoded tRNA leucine 2 [Source:MGJ Symbol:Acc:MGJ:102481]                                                 |
| ENSMUSG000000024766 | Lipol1        | -1.82      | 0.00   | 0.00 | 0.23          | 0.39   | 1.00  | -0.02      | 0.96   | 1.00 | lipase, member O1 [Source:MGJ Symbol:Acc:MGJ:2147582]                                                                     |
| ENSMUSG000000025089 | Gfr1          | -3.86      | 0.00   | 0.00 | 1.43          | 0.03   | 0.35  | 0.01       | 1.00   | 1.00 | glial cell line derived neurotrophic factor family receptor alpha 1 [Source:MGJ Symbol:Acc:MGJ:1100842]                   |
| ENSMUSG000000032527 | hcbf          | -0.66      | 0.00   | 0.00 | 0.21          | 0.02   | 0.21  | -0.22      | 0.03   | 1.00 | propionyl Coenzyme A carboxylase, beta polypeptide [Source:MGJ Symbol:Acc:MGJ:1914154]                                    |
| ENSMUSG000000029728 | Lbr1          | -2.19      | 0.00   | 0.00 | 0.63          | 0.01   | 0.11  | -0.20      | 0.54   | 1.00 | carbonic anhydrase 4 [Source:MGJ Symbol:Acc:MGJ:106428]                                                                   |
| ENSMUSG000000052139 | Bre           | -2.73      | 0.00   | 0.00 | 0.73          | 0.11   | 0.87  | -0.13      | 0.57   | 1.00 | brain and reproductive organ-expressed protein [Source:MGJ Symbol:Acc:MGJ:1333875]                                        |
| ENSMUSG000000035472 | Slc25a21      | -5.19      | 0.00   | 0.00 | 2.29          | 0.07   | 0.62  | -0.18      | 0.58   | 1.00 | solute carrier family 25 (mitochondrial oxodicarboxylate carrier), member 21 [Source:MGJ Symbol:Acc:MGJ:2445059]          |
| ENSMUSG000000058690 | Gcap14        | -0.98      | 0.00   | 0.00 | 0.17          | 0.12   | 0.90  | 0.05       | 0.66   | 1.00 | granule cell antiserum positive 14 [Source:MGJ Symbol:Acc:MGJ:101859]                                                     |
| ENSMUSG000000025137 | Pcyt2         | -0.91      | 0.00   | 0.00 | 0.24          | 0.02   | 0.26  | -0.17      | 0.10   | 1.00 | phosphate cytidyltransferase 2, ethanolamine [Source:MGJ Symbol:Acc:MGJ:1915921]                                          |
| ENSMUSG000000021322 | Aoah          | -2.04      | 0.00   | 0.00 | 0.83          | 0.00   | 0.08  | -0.06      | 0.77   | 1.00 | acyloxyacyl hydrolase [Source:MGJ Symbol:Acc:MGJ:1350928]                                                                 |
| ENSMUSG000000032287 | Itp2          | -1.84      | 0.00   | 0.00 | 0.56          | 0.03   | 0.39  | -0.25      | 0.17   | 1.00 | inositol 1,4,5-trisphosphate receptor 2 [Source:MGJ Symbol:Acc:MGJ:99418]                                                 |
| ENSMUSG000000029728 | Lbr1          | -1.58      | 0.00   | 0.00 | 0.63          | 0.01   | 0.11  | -0.27      | 0.54   | 1.00 | carbonic anhydrase 4 [Source:MGJ Symbol:Acc:MGJ:1333771]                                                                  |
| ENSMUSG000000040640 | Erc2          | -2.82      | 0.00   | 0.00 | 0.85          | 0.21   | 1.00  | 0.11       | 0.62   | 1.00 | ELK/RAB-interacting/CAST family member 2 [Source:MGJ Symbol:Acc:MGJ:1098749]                                              |
| ENSMUSG000000038497 | Tmco3         | -1.31      | 0.00   | 0.00 | 0.39          | 0.02   | 0.25  | 0.26       | 0.05   | 1.00 | transmembrane and coiled-coil domains 3 [Source:MGJ Symbol:Acc:MGJ:2444946]                                               |
| ENSMUSG000000051177 | Picb1         | -3.29      | 0.00   | 0.00 | 0.68          | 0.31   | 1.00  | 0.05       | 0.87   | 1.00 | phospholipase C, beta 1 [Source:MGJ Symbol:Acc:MGJ:97613]                                                                 |
| ENSMUSG000000021081 | Serpinaf1     | -1.54      | 0.00   | 0.00 | 0.55          | 0.01   | 0.16  | -0.29      | 0.08   | 1.00 | serine (or cysteine) peptidase inhibitor, clade A, member 1F [Source:MGJ Symbol:Acc:MGJ:1915588]                          |
| ENSMUSG000000027957 | Slc35a3       | -1.08      | 0.00   | 0.00 | 0.35          | 0.01   | 0.12  | 0.06       | 0.66   | 1.00 | solute carrier family 35 (UDP-N-acetylglucosamine (UDP-GlcNAc) transporter), member 3 [Source:MGJ Symbol:Acc:MGJ:1917648] |
| ENSMUSG000000072575 | Eidm3b        | -3.04      | 0.00   | 0.00 | 0.23          | 0.84   | 1.00  | -0.25      | 0.33   | 1.00 | epididymal protein 3B [Source:MGJ Symbol:Acc:MGJ:268492]                                                                  |
| ENSMUSG000000029728 | Lbr1          | -1.58      | 0.00   | 0.00 | 0.63          | 0.01   | 0.11  | -0.27      | 0.54   | 1.00 | carbonic anhydrase 4 [Source:MGJ Symbol:Acc:MGJ                                                                           |

|                      |              |       |      |      |       |      |      |       |      |      |                                                                                                          |
|----------------------|--------------|-------|------|------|-------|------|------|-------|------|------|----------------------------------------------------------------------------------------------------------|
| ENSMUSG00000052305   | Hbb-b1       | -2.16 | 0.00 | 0.00 | 0.20  | 0.41 | 1.00 | -0.16 | 0.66 | 1.00 | hemoglobin, beta adult major chain [Source:MGI Symbol:Acc:MGI:96021]                                     |
| ENSMUSG00000015474   | Pp2i         | -0.94 | 0.00 | 0.01 | 0.15  | 0.28 | 1.00 | 0.21  | 0.09 | 1.00 | palmitoyl-protein thioesterase 2 [Source:MGI Symbol:Acc:MGI:1860075]                                     |
| ENSMUSG00000022836   | Myk          | -1.13 | 0.00 | 0.03 | 0.13  | 0.51 | 1.00 | -0.09 | 0.57 | 1.00 | myosin, light polypeptide kinase [Source:MGI Symbol:Acc:MGI:894908]                                      |
| ENSMUSG00000009594   | Hbb-2        | -2.18 | 0.00 | 0.00 | 0.30  | 0.24 | 1.00 | -0.07 | 0.87 | 1.00 | hemoglobin alpha, adult chain 2 [Source:MGI Symbol:Acc:MGI:96016]                                        |
| ENSMUSG00000003823   | Crot         | -0.60 | 0.00 | 0.00 | 0.12  | 0.13 | 0.95 | 0.25  | 0.00 | 0.93 | carnitine O-octanoyltransferase [Source:MGI Symbol:Acc:MGI:1921364]                                      |
| ENSMUSG000000024575  | Pde6a        | -3.46 | 0.00 | 0.00 | 0.49  | 0.77 | 1.00 | -0.14 | 0.68 | 1.00 | phosphodiesterase 6A, cGMP-specific, rod, alpha [Source:MGI Symbol:Acc:MGI:97524]                        |
| ENSMUSG000000044674  | Fzd1         | -1.19 | 0.00 | 0.00 | 0.37  | 0.05 | 0.53 | -0.20 | 0.22 | 1.00 | frizzled homolog 1 (Drosophila) [Source:MGI Symbol:Acc:MGI:1196625]                                      |
| ENSMUSG000000090213  | Tmem189      | -0.75 | 0.00 | 0.00 | 0.29  | 0.00 | 0.05 | 0.17  | 0.15 | 1.00 | transmembrane protein 189 [Source:MGI Symbol:Acc:MGI:2142624]                                            |
| ENSMUSG00000006919   | Hba-a1       | -2.17 | 0.00 | 0.00 | 0.30  | 0.25 | 1.00 | -0.06 | 0.87 | 1.00 | hemoglobin alpha, adult chain 1 [Source:MGI Symbol:Acc:MGI:96015]                                        |
| ENSMUSG000000023923  | Tbc1d5       | -2.93 | 0.00 | 0.00 | 1.02  | 0.08 | 0.68 | -0.01 | 1.00 | 1.00 | TBC1 domain family, member 5 [Source:MGI Symbol:Acc:MGI:1919488]                                         |
| ENSMUSG00000000939   | Hbb-1        | -1.18 | 0.00 | 0.00 | 0.30  | 0.24 | 1.00 | -0.07 | 0.87 | 1.00 | hemoglobin beta, adult chain 1 [Source:MGI Symbol:Acc:MGI:97495]                                         |
| ENSMUSG000000045095  | Mag1         | -2.72 | 0.00 | 0.00 | 0.53  | 0.44 | 1.00 | -0.13 | 0.72 | 1.00 | membrane associated guanylate kinase, WW and PDZ domain containing 1 [Source:MGI Symbol:Acc:MGI:1203622] |
| ENSMUSG000000024391  | Apom         | -1.15 | 0.00 | 0.00 | 0.48  | 0.01 | 0.09 | -0.24 | 0.14 | 1.00 | apolipoprotein M [Source:MGI Symbol:Acc:MGI:1930124]                                                     |
| ENSMUSG000000028465  | Tin1         | -0.66 | 0.00 | 0.00 | 0.14  | 0.13 | 0.96 | -0.09 | 0.37 | 1.00 | talin 1 [Source:MGI Symbol:Acc:MGI:1099832]                                                              |
| ENSMUSG000000035699  | Osta         | -1.24 | 0.00 | 0.00 | 0.43  | 0.01 | 0.09 | 0.24  | 0.17 | 1.00 | organic solute transporter alpha [Source:MGI Symbol:Acc:MGI:2146634]                                     |
| ENSMUSG000000030654  | Atf6p1       | -0.60 | 0.00 | 0.00 | 0.03  | 0.64 | 1.00 | -0.02 | 0.87 | 1.00 | ADP-ribosylation factor-like E interacting protein 1 [Source:MGI Symbol:Acc:MGI:1858943]                 |
| ENSMUSG000000036330  | Slc18a1      | -1.16 | 0.00 | 0.00 | -0.07 | 0.78 | 1.00 | 0.23  | 0.14 | 1.00 | solute carrier family 18 (vesicular monoamine), member 1 [Source:MGI Symbol:Acc:MGI:106684]              |
| ENSMUSG00000003142   | Nkuf1        | -2.73 | 0.00 | 0.00 | 0.54  | 0.42 | 1.00 | -0.07 | 0.86 | 1.00 | nucleotide binding protein-like [Source:MGI Symbol:Acc:MGI:1924076]                                      |
| ENSMUSG000000045038  | Pknox        | -2.70 | 0.00 | 0.00 | 0.43  | 0.69 | 1.00 | -0.14 | 0.66 | 1.00 | protein kinase C, epsilon [Source:MGI Symbol:Acc:MGI:97599]                                              |
| ENSMUSG000000024757  | Slc22a19     | -1.08 | 0.00 | 0.00 | 0.11  | 0.56 | 1.00 | -0.17 | 0.25 | 1.00 | solute carrier family 22 (organic anion transporter), member 19 [Source:MGI Symbol:Acc:MGI:2442751]      |
| ENSMUSG000000049858  | Suox         | -1.06 | 0.00 | 0.00 | 0.37  | 0.02 | 0.31 | -0.08 | 0.60 | 1.00 | sulfite oxidase [Source:MGI Symbol:Acc:MGI:2446117]                                                      |
| ENSMUSG000000020475  | Abhd3        | -1.08 | 0.00 | 0.00 | 0.35  | 0.04 | 0.46 | 0.04  | 0.81 | 1.00 | abhydrolase domain containing 3 [Source:MGI Symbol:Acc:MGI:2147183]                                      |
| ENSMUSG000000040558  | Ndr2g        | -1.07 | 0.00 | 0.00 | 0.42  | 0.01 | 0.19 | 0.00  | 1.00 | 1.00 | N-myc downstream regulated gene 2 [Source:MGI Symbol:Acc:MGI:1352498]                                    |
| ENSMUSG000000058325  | Dock1        | -1.46 | 0.00 | 0.00 | -0.06 | 0.85 | 1.00 | 0.00  | 1.00 | 1.00 | dedicator of cytokinesis 1 [Source:MGI Symbol:Acc:MGI:2429765]                                           |
| ENSMUSG000000028336  | Tom1f2       | -0.99 | 0.00 | 0.00 | 0.31  | 0.02 | 0.22 | -0.09 | 0.50 | 1.00 | target of myb1-like 2 (chicken) [Source:MGI Symbol:Acc:MGI:2433306]                                      |
| ENSMUSG000000030770  | Hbb-3        | -0.99 | 0.00 | 0.00 | 0.42  | 0.01 | 0.11 | 0.00  | 1.00 | 1.00 | hemoglobin beta, adult chain 3 [Source:MGI Symbol:Acc:MGI:1931144]                                       |
| ENSMUSG000000044349  | Snhg11       | -0.83 | 0.00 | 0.00 | -0.01 | 1.00 | 1.00 | -0.19 | 0.18 | 1.00 | small nuclear RNA host gene 11 [Source:MGI Symbol:Acc:MGI:2441845]                                       |
| ENSMUSG000000051517  | Ahgef39      | -2.55 | 0.00 | 0.00 | 1.21  | 0.01 | 0.17 | -0.11 | 0.72 | 1.00 | Rho guanine nucleotide exchange factor (GEF) 39 [Source:MGI Symbol:Acc:MGI:3036286]                      |
| ENSMUSG000000031703  | Iltf1        | -0.83 | 0.00 | 0.00 | 0.33  | 0.01 | 0.12 | 0.09  | 0.47 | 1.00 | integrin alpha FG-GAP repeat containing 1 [Source:MGI Symbol:Acc:MGI:106419]                             |
| ENSMUSG000000035765  | Dym          | -2.45 | 0.00 | 0.00 | 1.08  | 0.02 | 0.26 | 0.07  | 0.86 | 1.00 | dymectin [Source:MGI Symbol:Acc:MGI:1918480]                                                             |
| ENSMUSG000000027363  | Usp8         | -0.77 | 0.00 | 0.00 | 0.26  | 0.02 | 0.30 | 0.10  | 0.39 | 1.00 | ubiquitin specific peptidase 8 [Source:MGI Symbol:Acc:MGI:1934029]                                       |
| ENSMUSG000000043628  | Ctsh         | -0.45 | 0.00 | 0.00 | 0.36  | 0.05 | 0.10 | -0.07 | 0.66 | 1.00 | 0.37                                                                                                     |
| ENSMUSG000000034544  | Rerc1        | -3.05 | 0.00 | 0.00 | 0.39  | 0.80 | 1.00 | 0.02  | 1.00 | 1.00 | arginine/serine-rich coiled-coil 1 [Source:MGI Symbol:Acc:MGI:1914130]                                   |
| ENSMUSG000000027679  | Dnajc19      | -1.09 | 0.00 | 0.00 | 0.51  | 0.00 | 0.06 | 0.11  | 0.47 | 1.00 | DnaJ (Hsp40) homolog, subfamily C, member 19 [Source:MGI Symbol:Acc:MGI:1914963]                         |
| ENSMUSG000000044444  | Pfn3         | -2.33 | 0.00 | 0.00 | 0.77  | 0.12 | 0.90 | -0.01 | 1.00 | 1.00 | profilin 3 [Source:MGI Symbol:Acc:MGI:2178800]                                                           |
| ENSMUSG0000000089781 | Gm15756      | -1.33 | 0.00 | 0.00 | 0.65  | 0.00 | 0.07 | 0.06  | 0.78 | 1.00 | predicted gene 15756 [Source:MGI Symbol:Acc:MGI:3783199]                                                 |
| ENSMUSG000000015451  | C4a          | -1.67 | 0.00 | 0.00 | 0.12  | 0.73 | 1.00 | -0.22 | 0.31 | 1.00 | complement component 4A (Rodgers blood group) [Source:MGI Symbol:Acc:MGI:98320]                          |
| ENSMUSG000000028332  | Papps1       | -1.00 | 0.00 | 0.00 | 0.37  | 0.02 | 0.29 | 0.38  | 0.01 | 1.00 | 3-phosphoadenosine 5-phosphosulfate synthase 1 [Source:MGI Symbol:Acc:MGI:1330587]                       |
| ENSMUSG000000004386  | C3orf2       | -0.68 | 0.00 | 0.00 | 0.33  | 0.05 | 0.22 | -0.06 | 0.77 | 1.00 | signal receptor (docking protein) [Source:MGI Symbol:Acc:MGI:1914648]                                    |
| ENSMUSG000000020576  | Nbas         | -2.16 | 0.00 | 0.00 | 1.06  | 0.01 | 0.16 | -0.04 | 0.93 | 1.00 | neuroblastoma amplified sequence [Source:MGI Symbol:Acc:MGI:1918419]                                     |
| ENSMUSG000000051864  | Tbc1d22a     | -2.11 | 0.00 | 0.00 | 0.56  | 0.25 | 1.00 | -0.14 | 0.61 | 1.00 | TBC1 domain family, member 22a [Source:MGI Symbol:Acc:MGI:1289265]                                       |
| ENSMUSG000000026839  | Upp2         | -2.74 | 0.00 | 0.00 | 0.72  | 0.31 | 1.00 | 0.38  | 0.15 | 1.00 | uridine phosphorylase 2 [Source:MGI Symbol:Acc:MGI:1923904]                                              |
| ENSMUSG0000000084058 | Gm15263      | -6.58 | 0.00 | 0.00 | 0.19  | 1.00 | 1.00 | -5.49 | 0.00 | 0.00 | predicted gene 15263 [Source:MGI Symbol:Acc:MGI:3705753]                                                 |
| ENSMUSG000000035919  | Bbs9         | -3.63 | 0.00 | 0.00 | 0.18  | 1.00 | 1.00 | -0.07 | 0.91 | 1.00 | Bardet-Biedl syndrome 9 (human) [Source:MGI Symbol:Acc:MGI:2442833]                                      |
| ENSMUSG000000031119  | Gpc4         | -0.94 | 0.00 | 0.00 | 0.47  | 0.01 | 0.10 | 0.07  | 0.68 | 1.00 | glypican 4 [Source:MGI Symbol:Acc:MGI:104902]                                                            |
| ENSMUSG000000010025  | Ahd3c2       | -0.68 | 0.00 | 0.00 | 0.65  | 0.02 | 0.22 | -0.06 | 0.82 | 1.00 | aldehyde dehydrogenase family 3, subfamily A2 [Source:MGI Symbol:Acc:MGI:1353452]                        |
| ENSMUSG000000020664  | Herc4        | -1.14 | 0.00 | 0.00 | 0.58  | 0.01 | 0.18 | 0.13  | 0.40 | 1.00 | transhyretin [Source:MGI Symbol:Acc:MGI:98865]                                                           |
| ENSMUSG000000020064  | Herc2        | -1.01 | 0.00 | 0.00 | 0.39  | 0.02 | 0.27 | 0.06  | 0.68 | 1.00 | hect domain and RLD 4 [Source:MGI Symbol:Acc:MGI:1914595]                                                |
| ENSMUSG000000066258  | Trtm12a      | -1.63 | 0.00 | 0.00 | 0.29  | 0.44 | 1.00 | 0.22  | 0.31 | 1.00 | tripartite motif-containing 12A [Source:MGI Symbol:Acc:MGI:1923931]                                      |
| ENSMUSG000000049799  | Lrc19        | -0.70 | 0.00 | 0.00 | 0.27  | 0.01 | 0.17 | 0.05  | 0.71 | 1.00 | leucine rich repeat containing 19 [Source:MGI Symbol:Acc:MGI:2140219]                                    |
| ENSMUSG000000078622  | Ccdc47       | -0.88 | 0.00 | 0.00 | 0.20  | 0.18 | 1.00 | 0.03  | 0.83 | 1.00 | coiled-coil domain containing 47 [Source:MGI Symbol:Acc:MGI:1914413]                                     |
| ENSMUSG000000023019  | Gpdt1        | -0.52 | 0.00 | 0.00 | 0.11  | 0.12 | 0.94 | -0.09 | 0.34 | 1.00 | glycerol-3-phosphate dehydrogenase 1 (soluble) [Source:MGI Symbol:Acc:MGI:95679]                         |
| ENSMUSG000000004038  | Chn2         | -2.26 | 0.00 | 0.00 | 0.83  | 0.05 | 0.55 | -0.10 | 0.80 | 1.00 | chimerin (chimaerin) 2 [Source:MGI Symbol:Acc:MGI:1917243]                                               |
| ENSMUSG000000030030  | Ctsh2b       | -2.68 | 0.00 | 0.00 | 0.51  | 0.52 | 1.00 | 0.14  | 0.44 | 1.00 | coiled-coil domain containing 6 [Source:MGI Symbol:Acc:MGI:1913348]                                      |
| ENSMUSG000000052005  | Dock8        | -1.18 | 0.00 | 0.00 | 0.49  | 0.02 | 0.29 | 0.14  | 0.44 | 1.00 | dedicator of cytokinesis 8 [Source:MGI Symbol:Acc:MGI:1921396]                                           |
| ENSMUSG000000043789  | Vwce         | -2.54 | 0.00 | 0.00 | 1.19  | 0.02 | 0.31 | -0.11 | 0.77 | 1.00 | von Willebrand factor C and EGF domains [Source:MGI Symbol:Acc:MGI:1919018]                              |
| ENSMUSG000000027559  | Car3         | -2.52 | 0.00 | 0.00 | 0.47  | 0.58 | 1.00 | -0.13 | 0.69 | 1.00 | carbonic anhydrase 3 [Source:MGI Symbol:Acc:MGI:88270]                                                   |
| ENSMUSG000000053333  | Dlx3l2       | -2.35 | 0.00 | 0.00 | 0.55  | 0.38 | 1.00 | -0.05 | 0.93 | 1.00 | DlX3 mitotic control homolog (S. cerevisiae)-like 2 [Source:MGI Symbol:Acc:MGI:2442555]                  |
| ENSMUSG000000008455  | 1810059H2Rk  | -1.63 | 0.00 | 0.00 | 0.84  | 0.01 | 0.09 | -0.21 | 0.37 | 1.00 | RIKEN cDNA 1810059H22 gene [Source:MGI Symbol:Acc:MGI:1917070]                                           |
| ENSMUSG000000025607  | Dggh2        | -1.39 | 0.00 | 0.00 | 0.74  | 0.00 | 0.06 | -0.02 | 0.95 | 1.00 | coatomer protein complex, subunit gamma 2 [Source:MGI Symbol:Acc:MGI:1858683]                            |
| ENSMUSG000000002177  | Ch22h17      | -0.97 | 0.00 | 0.00 | 0.51  | 0.01 | 0.18 | 0.04  | 0.40 | 1.00 | ribonucleoside diphosphate kinase 17 [Source:MGI Symbol:Acc:MGI:1289248]                                 |
| ENSMUSG000000073609  | Cpzhg        | -0.78 | 0.00 | 0.00 | 0.55  | 0.02 | 0.25 | -0.11 | 0.54 | 1.00 | D-2-hydroxyglutarate dehydrogenase [Source:MGI Symbol:Acc:MGI:2138209]                                   |
| ENSMUSG000000019989  | Enpp3        | -1.06 | 0.00 | 0.00 | 0.36  | 0.07 | 0.62 | 0.06  | 0.74 | 1.00 | ectonucleotide pyrophosphatase/phosphodiesterase 3 [Source:MGI Symbol:Acc:MGI:2143702]                   |
| ENSMUSG000000026727  | Rsu1         | -1.80 | 0.00 | 0.00 | 0.28  | 0.53 | 1.00 | -0.15 | 0.58 | 1.00 | Ras suppressor protein 1 [Source:MGI Symbol:Acc:MGI:103040]                                              |
| ENSMUSG000000008962  | Gm16039      | -1.24 | 0.00 | 0.00 | 0.64  | 0.00 | 0.07 | 0.11  | 0.58 | 1.00 | predicted gene 16039 [Source:MGI Symbol:Acc:MGI:3840148]                                                 |
| ENSMUSG000000032098  | Trh          | -0.91 | 0.00 | 0.00 | 0.39  | 0.01 | 0.18 | -0.01 | 1.00 | 1.00 | trehalase (brush-border membrane glycoprotein) [Source:MGI Symbol:Acc:MGI:1926230]                       |
| ENSMUSG000000020279  | Lmf1         | -2.01 | 0.00 | 0.00 | 0.78  | 0.08 | 0.68 | -0.14 | 0.60 | 1.00 | inase maturation factor 1 [Source:MGI Symbol:Acc:MGI:1923733]                                            |
| ENSMUSG0000000032263 | Chn2b        | -5.56 | 0.00 | 0.00 | 0.41  | 0.01 | 1.00 | -0.01 | 0.40 | 1.00 | ribonucleoside diphosphate kinase 17 [Source:MGI Symbol:Acc:MGI:1289248]                                 |
| ENSMUSG0000000031708 | Tecr         | -0.75 | 0.00 | 0.00 | 0.32  | 0.01 | 0.14 | -0.10 | 0.44 | 1.00 | trans-2,3-enoyl-CoA reductase [Source:MGI Symbol:Acc:MGI:1915408]                                        |
| ENSMUSG000000014418  | Hps5         | -0.86 | 0.00 | 0.00 | 0.39  | 0.01 | 0.13 | 0.06  | 0.69 | 1.00 | Hermansky-Pudlak syndrome 5 homolog (human) [Source:MGI Symbol:Acc:MGI:2180307]                          |
| ENSMUSG000000032263  | Bckkbb       | -1.07 | 0.00 | 0.00 | 0.12  | 0.57 | 1.00 | -0.03 | 0.88 | 1.00 | branched chain ketoacid dehydrogenase E1, beta polypeptide [Source:MGI Symbol:Acc:MGI:88137]             |
| ENSMUSG000000020429  | Igfbp1       | -2.73 | 0.00 | 0.00 | 0.43  | 0.63 | 1.00 | -1.17 | 0.00 | 0.75 | insulin-like growth factor binding protein 1 [Source:MGI Symbol:Acc:MGI:96436]                           |
| ENSMUSG000000028755  | Cda          | -0.84 | 0.00 | 0.00 | 0.40  | 0.00 | 0.05 | 0.02  | 0.90 | 1.00 | cytidine deaminase [Source:MGI Symbol:Acc:MGI:1919519]                                                   |
| ENSMUSG000000041351  | Rap1ap       | -0.90 | 0.00 | 0.00 | 0.16  | 0.35 | 1.00 | -0.31 | 0.10 | 1.00 | Rap1 GTPase-activating protein [Source:MGI Symbol:Acc:MGI:109338]                                        |
| ENSMUSG000000032473  | D430042009Rk | -1.87 | 0.00 | 0.00 | 0.88  | 0.03 | 0.38 | -0.06 | 0.86 | 1.00 | RIKEN cDNA D430042009 gene [Source:MGI Symbol:Acc:MGI:2442760]                                           |
| ENSMUSG000000008559  | Gm14437      | -2.13 | 0.00 | 0.00 | 0.95  | 0.04 | 0.44 | -0.18 | 0.57 | 1.00 | predicted gene 14437 [Source:MGI Symbol:Acc:MGI:3652089]                                                 |
| ENSMUSG000000011522  | Cyp29b       | -1.66 | 0.00 | 0.00 | 0.01  | 0.12 | 0.06 | -0.05 | 0.18 | 1.00 | collagen, type IV, alpha 2 [Source:MGI Symbol:Acc:MGI:88456]                                             |



|                      |               |       |      |      |      |      |      |       |      |      |                                                                                                                    |
|----------------------|---------------|-------|------|------|------|------|------|-------|------|------|--------------------------------------------------------------------------------------------------------------------|
| ENSMUSG00000015750   | Aph1a         | -0.62 | 0.00 | 0.00 | 0.10 | 0.41 | 1.00 | -0.07 | 0.58 | 1.00 | anterior pharynx defective 1a homolog (C. elegans) [Source:MGI Symbol;Acc:MGI:2385110]                             |
| ENSMUSG000000086297  | Gm15632       | -1.37 | 0.00 | 0.00 | 0.46 | 0.13 | 0.96 | 0.07  | 0.77 | 1.00 | predicted gene 15632 [Source:MGI Symbol;Acc:MGI:3783076]                                                           |
| ENSMUSG00000001993   | Mippp         | -1.12 | 0.00 | 0.00 | 0.62 | 0.01 | 0.10 | 0.08  | 0.66 | 1.00 | mitochondrial intermediate peptidase [Source:MGI Symbol;Acc:MGI:1917728]                                           |
| ENSMUSG00000004213   | Cb2           | -0.96 | 0.00 | 0.00 | 0.49 | 0.01 | 0.18 | 0.02  | 0.96 | 1.00 | cystine-conjugate-beta lyase 2 [Source:MGI Symbol;Acc:MGI:2877849]                                                 |
| ENSMUSG00000003169   | Sap30         | -1.15 | 0.00 | 0.00 | 0.14 | 0.66 | 1.00 | 0.24  | 0.22 | 1.00 | sn3 associated polypeptide [Source:MGI Symbol;Acc:MGI:1929129]                                                     |
| ENSMUSG00000006004   | Tmem26        | -2.31 | 0.00 | 0.00 | 0.77 | 0.25 | 1.00 | -0.25 | 0.49 | 1.00 | transmembrane protein 26 [Source:MGI Symbol;Acc:MGI:2143537]                                                       |
| ENSMUSG000000027195  | Hsd17b12      | -0.84 | 0.00 | 0.00 | 0.37 | 0.02 | 0.29 | 0.08  | 0.61 | 1.00 | hydroxysteroid (17-beta) dehydrogenase 12 [Source:MGI Symbol;Acc:MGI:1926676]                                      |
| ENSMUSG000000058740  | Kcnt1         | -1.32 | 0.00 | 0.00 | 0.39 | 0.20 | 1.00 | -0.20 | 0.37 | 1.00 | potassium channel, subfamily T, member 1 [Source:MGI Symbol;Acc:MGI:1924627]                                       |
| ENSMUSG000000047193  | Dync2h1       | -1.59 | 0.00 | 0.00 | 0.75 | 0.03 | 0.39 | 0.18  | 0.52 | 1.00 | dynein cytoplasmic 2 heavy chain 1 [Source:MGI Symbol;Acc:MGI:107736]                                              |
| ENSMUSG000000046352  | Glyc2         | -0.86 | 0.00 | 0.00 | 0.14 | 0.38 | 1.00 | 0.01  | 0.97 | 1.00 | gap junction protein, beta 2 [Source:MGI Symbol;Acc:MGI:95720]                                                     |
| ENSMUSG00000004213   | Cb2           | -0.96 | 0.00 | 0.00 | 0.49 | 0.01 | 0.18 | 0.02  | 0.96 | 1.00 | thiamine S-methyltransferase 2 [Source:MGI Symbol;Acc:MGI:2443927]                                                 |
| ENSMUSG000000037347  | Chat7         | -1.50 | 0.00 | 0.00 | 0.62 | 0.07 | 0.65 | 0.26  | 0.28 | 1.00 | carbohydrate (N-acetylglucosamine) sulfotransferase 7 [Source:MGI Symbol;Acc:MGI:1891767]                          |
| ENSMUSG000000029189  | Sal13         | -0.68 | 0.00 | 0.00 | 0.31 | 0.02 | 0.25 | -0.19 | 0.14 | 1.00 | sal-1 suppressor of lin-12 like 3 (C. elegans) [Source:MGI Symbol;Acc:MGI:1916941]                                 |
| ENSMUSG000000062202  | Btd9          | -1.43 | 0.00 | 0.00 | 0.41 | 0.23 | 1.00 | 0.08  | 0.76 | 1.00 | BTB (POZ) domain containing 9 [Source:MGI Symbol;Acc:MGI:1916625]                                                  |
| ENSMUSG000000027710  | Acad9         | -0.73 | 0.00 | 0.00 | 0.27 | 0.06 | 0.56 | 0.15  | 0.29 | 1.00 | acyl-Coenzyme A dehydrogenase family, member 9 [Source:MGI Symbol;Acc:MGI:1914272]                                 |
| ENSMUSG000000052062  | Par3b         | -2.49 | 0.00 | 0.00 | 0.07 | 1.00 | 1.00 | -0.08 | 0.91 | 1.00 | par-3 partitioning defective 3 homolog B (C. elegans) [Source:MGI Symbol;Acc:MGI:1919301]                          |
| ENSMUSG000000091192  | Gm17071       | -1.88 | 0.00 | 0.00 | 0.76 | 0.01 | 0.18 | -0.03 | 0.94 | 1.00 | predicted gene 17071 [Source:MGI Symbol;Acc:MGI:4937898]                                                           |
| ENSMUSG000000038944  | Klf16b        | -1.27 | 0.00 | 0.00 | 0.63 | 0.02 | 0.29 | 0.04  | 0.89 | 1.00 | kinesin family member 16B [Source:MGI Symbol;Acc:MGI:1098240]                                                      |
| ENSMUSG000000028258  | Dnajc6        | -1.48 | 0.00 | 0.00 | 0.77 | 0.02 | 0.24 | 0.36  | 0.11 | 1.00 | DnaJ (Hsp40) homolog, subfamily C, member 6 [Source:MGI Symbol;Acc:MGI:1919355]                                    |
| ENSMUSG000000040269  | Mrs26         | -1.80 | 0.00 | 0.00 | 0.93 | 0.02 | 0.29 | 0.08  | 0.85 | 1.00 | mitochondrial ribosomal protein S28 [Source:MGI Symbol;Acc:MGI:1913480]                                            |
| ENSMUSG000000064127  | Med14         | -0.80 | 0.00 | 0.00 | 0.43 | 0.01 | 0.11 | -0.29 | 0.04 | 1.00 | mediator complex subunit 14 [Source:MGI Symbol;Acc:MGI:1349442]                                                    |
| ENSMUSG000000034007  | Scaper        | -2.72 | 0.00 | 0.00 | 0.59 | 0.61 | 1.00 | 0.01  | 1.00 | 1.00 | S phase cyclin A-associated protein in the ER [Source:MGI Symbol;Acc:MGI:1925976]                                  |
| ENSMUSG000000021186  | Ftnb5         | -1.06 | 0.00 | 0.00 | 0.11 | 0.64 | 1.00 | 0.01  | 1.00 | 1.00 | fibulin 5 [Source:MGI Symbol;Acc:MGI:1346091]                                                                      |
| ENSMUSG000000013539  | D1H4225680E   | -0.87 | 0.00 | 0.00 | 0.37 | 0.04 | 0.41 | 0.00  | 1.00 | 1.00 | DNA segment, Chr 16, human D225680E, expressed [Source:MGI Symbol;Acc:MGI:101825]                                  |
| ENSMUSG000000009129  | CS3037F22Rik  | -2.23 | 0.00 | 0.00 | 0.79 | 0.20 | 1.00 | -0.03 | 1.00 | 1.00 | RIKEN cDNA CS3037F22 gene [Source:MGI Symbol;Acc:MGI:2442827]                                                      |
| ENSMUSG000000068740  | Cb2           | -0.73 | 0.00 | 0.00 | 0.49 | 0.25 | 1.00 | 0.25  | 0.90 | 1.00 | cadherin, EGF LAG surface type 2 (flamingo homolog, Drosophila) [Source:MGI Symbol;Acc:MGI:1858235]                |
| ENSMUSG000000050965  | Prkca         | -2.14 | 0.00 | 0.00 | 0.07 | 1.00 | 1.00 | 0.10  | 0.76 | 1.00 | protein kinase C, alpha [Source:MGI Symbol;Acc:MGI:97595]                                                          |
| ENSMUSG000000052176  | Hogai1        | -0.59 | 0.00 | 0.00 | 0.18 | 0.11 | 0.84 | -0.04 | 0.75 | 1.00 | 4-hydroxy-2-oxoglutarate aldolase 1 [Source:MGI Symbol;Acc:MGI:1914682]                                            |
| ENSMUSG000000019297  | 2610027L16Rik | -0.55 | 0.00 | 0.00 | 0.20 | 0.04 | 0.45 | 0.02  | 0.85 | 1.00 | RIKEN cDNA 2610027L16 gene [Source:MGI Symbol;Acc:MGI:1915092]                                                     |
| ENSMUSG000000036452  | Arhgap26      | -1.88 | 0.00 | 0.00 | 0.39 | 0.37 | 1.00 | -0.10 | 0.78 | 1.00 | Rho GTPase activating protein 26 [Source:MGI Symbol;Acc:MGI:1918552]                                               |
| ENSMUSG000000063652  | Slc22a21      | -0.80 | 0.00 | 0.00 | 0.47 | 0.01 | 0.09 | -0.08 | 0.88 | 1.00 | solute carrier family 22 (organic cation transporter), member 21 [Source:MGI Symbol;Acc:MGI:1929481]               |
| ENSMUSG000000004922  | Slc22a1       | -1.60 | 0.00 | 0.00 | 0.82 | 0.01 | 0.01 | -0.25 | 0.01 | 1.00 | lysine transporter 1 [Source:MGI Symbol;Acc:MGI:192684]                                                            |
| ENSMUSG000000026623  | Lgcat1        | -0.60 | 0.00 | 0.00 | 0.28 | 0.03 | 0.31 | 0.19  | 0.11 | 1.00 | lysophosphatidylglycerol acyltransferase 1 [Source:MGI Symbol;Acc:MGI:2446186]                                     |
| ENSMUSG000000008734  | AW495222      | -1.46 | 0.00 | 0.00 | 0.35 | 0.36 | 1.00 | -0.38 | 0.15 | 1.00 | expressed sequence AW495222 [Source:MGI Symbol;Acc:MGI:2145435]                                                    |
| ENSMUSG000000024371  | C2            | -0.55 | 0.00 | 0.00 | 0.26 | 0.01 | 0.11 | -0.21 | 0.08 | 1.00 | complement component 2 (within H-2S) [Source:MGI Symbol;Acc:MGI:88226]                                             |
| ENSMUSG000000002371  | Ccdc90a       | -0.56 | 0.00 | 0.00 | 0.31 | 0.00 | 0.06 | 0.13  | 0.25 | 1.00 | coiled-coil domain containing 90A [Source:MGI Symbol;Acc:MGI:1923387]                                              |
| ENSMUSG000000039186  | Akap7         | -2.39 | 0.00 | 0.00 | 0.72 | 0.40 | 1.00 | -0.13 | 0.82 | 1.00 | A kinase (PRKA) anchor protein 7 [Source:MGI Symbol;Acc:MGI:1859150]                                               |
| ENSMUSG000000039221  | Rpl22b1       | -1.03 | 0.00 | 0.00 | 0.16 | 0.58 | 1.00 | -0.01 | 1.00 | 1.00 | rDNA sequence, Chr 12, like 1 [Source:MGI Symbol;Acc:MGI:1915278]                                                  |
| ENSMUSG000000004922  | Slc12a4       | -1.79 | 0.00 | 0.00 | 0.54 | 0.02 | 0.28 | -0.05 | 0.65 | 1.00 | similarly 190, member A [Source:MGI Symbol;Acc:MGI:3045354]                                                        |
| ENSMUSG000000059027  | 963013D21Rik  | -1.90 | 0.00 | 0.00 | 0.76 | 0.13 | 0.95 | -0.03 | 0.92 | 1.00 | RIKEN cDNA 963013D21 gene [Source:MGI Symbol;Acc:MGI:2442649]                                                      |
| ENSMUSG000000020859  | Spag9         | -0.58 | 0.00 | 0.00 | 0.27 | 0.02 | 0.21 | 0.10  | 0.40 | 1.00 | sperm associated antigen 9 [Source:MGI Symbol;Acc:MGI:1918084]                                                     |
| ENSMUSG000000021763  | BC067074      | -1.37 | 0.00 | 0.00 | 0.28 | 0.45 | 1.00 | -0.02 | 1.00 | 1.00 | cDNA sequence BC067074 [Source:MGI Symbol;Acc:MGI:3040697]                                                         |
| ENSMUSG000000042942  | Greb11        | -1.95 | 0.00 | 0.00 | 0.91 | 0.04 | 0.47 | -0.51 | 0.16 | 1.00 | growth regulation by estrogen in breast cancer-like [Source:MGI Symbol;Acc:MGI:3576497]                            |
| ENSMUSG000000038831  | Ralgap1       | -1.94 | 0.00 | 0.00 | 1.11 | 0.02 | 0.25 | 0.04  | 1.00 | 1.00 | Ral GEF with PH domain and SH3 binding motif 1 [Source:MGI Symbol;Acc:MGI:1922008]                                 |
| ENSMUSG000000001957  | Ak32-ps       | -1.70 | 0.00 | 0.00 | 0.74 | 0.08 | 0.71 | 0.54  | 0.03 | 1.00 | adenylate kinase 3-like 2, pseudogene [Source:MGI Symbol;Acc:MGI:3574349]                                          |
| ENSMUSG000000002922  | Wip1          | -1.79 | 0.00 | 0.00 | 0.54 | 0.02 | 0.28 | -0.05 | 0.65 | 1.00 | WIP repeat domain, phosphoinositide interacting 1 [Source:MGI Symbol;Acc:MGI:1915284]                              |
| ENSMUSG000000022199  | Slc22a17      | -1.11 | 0.00 | 0.00 | 0.42 | 0.23 | 1.00 | 0.35  | 0.95 | 1.00 | solute carrier family 22 (organic cation transporter), member 17 [Source:MGI Symbol;Acc:MGI:1926225]               |
| ENSMUSG000000048264  | Dip2c         | -1.03 | 0.00 | 0.00 | 0.80 | 0.06 | 0.57 | -0.03 | 1.00 | 1.00 | DIP2 disco-interacting protein 2 homolog C (Drosophila) [Source:MGI Symbol;Acc:MGI:1920179]                        |
| ENSMUSG000000039530  | Tusc3         | -0.99 | 0.00 | 0.00 | 0.43 | 0.04 | 0.46 | -0.08 | 0.69 | 1.00 | tumor suppressor candidate 3 [Source:MGI Symbol;Acc:MGI:1933134]                                                   |
| ENSMUSG000000002707  | Galk2         | -1.03 | 0.00 | 0.00 | 0.62 | 0.00 | 0.07 | -0.04 | 0.90 | 1.00 | galactokinase 2 [Source:MGI Symbol;Acc:MGI:1917226]                                                                |
| ENSMUSG000000031558  | Slit2         | -1.50 | 0.00 | 0.00 | 0.49 | 0.19 | 1.00 | -0.02 | 1.00 | 1.00 | slit homolog 2 (Drosophila) [Source:MGI Symbol;Acc:MGI:1315205]                                                    |
| ENSMUSG000000031168  | Ebp           | -0.85 | 0.00 | 0.00 | 0.27 | 0.13 | 0.97 | -0.01 | 1.00 | 1.00 | phenylalkylamine Ca2+ antagonist (emopamil) binding protein [Source:MGI Symbol;Acc:MGI:107822]                     |
| ENSMUSG000000025922  | Slc9a2        | -1.11 | 0.00 | 0.00 | 0.69 | 0.00 | 0.07 | 0.03  | 0.95 | 1.00 | solute carrier family 9 (sodium/hydrogen exchanger), member 2 [Source:MGI Symbol;Acc:MGI:105075]                   |
| ENSMUSG000000016630  | AL653049.1    | -0.85 | 0.00 | 0.00 | 0.29 | 0.12 | 0.90 | 0.03  | 0.88 | 0.00 | unclassified protein family 22 (organic cation transporter)                                                        |
| ENSMUSG000000039678  | Tlctd13       | -0.61 | 0.00 | 0.00 | 0.29 | 0.02 | 0.24 | -0.15 | 0.26 | 1.00 | TBC1 domain family, member 13 [Source:MGI Symbol;Acc:MGI:2385326]                                                  |
| ENSMUSG00000004424   | Tlc3c         | -1.16 | 0.00 | 0.00 | 0.56 | 0.03 | 0.36 | 0.25  | 0.21 | 1.00 | tetratricopeptide repeat domain 39C [Source:MGI Symbol;Acc:MGI:1919997]                                            |
| ENSMUSG000000058756  | Thra          | -0.81 | 0.00 | 0.00 | 0.39 | 0.02 | 0.25 | -0.26 | 0.12 | 1.00 | thyroid hormone receptor alpha [Source:MGI Symbol;Acc:MGI:98742]                                                   |
| ENSMUSG000000019820  | Utrn          | -1.01 | 0.00 | 0.00 | 0.08 | 0.81 | 1.00 | 0.03  | 0.90 | 1.00 | utrophin [Source:MGI Symbol;Acc:MGI:104631]                                                                        |
| ENSMUSG000000025724  | Sec11a        | -0.76 | 0.00 | 0.00 | 0.39 | 0.01 | 0.12 | 0.33  | 0.04 | 1.00 | SEC11 homolog A (S. cerevisiae) [Source:MGI Symbol;Acc:MGI:1929464]                                                |
| ENSMUSG000000004922  | Slc12a4       | -1.79 | 0.00 | 0.00 | 0.29 | 0.07 | 0.66 | 0.05  | 0.80 | 1.00 | solute carrier family 12, member 4 (nonselective cation transporter), member 4 [Source:MGI Symbol;Acc:MGI:2385163] |
| ENSMUSG000000064639  | Gm15788       | -1.38 | 0.00 | 0.00 | 0.32 | 0.09 | 0.74 | 0.04  | 1.00 | 1.00 | predicted gene 15788 [Source:MGI Symbol;Acc:MGI:3783230]                                                           |
| ENSMUSG000000024697  | Gnat14        | -2.28 | 0.00 | 0.00 | 1.47 | 0.01 | 0.12 | 0.29  | 0.41 | 1.00 | guanine nucleotide binding protein, alpha 14 [Source:MGI Symbol;Acc:MGI:95769]                                     |
| ENSMUSG000000062054  | Iah1          | -0.97 | 0.00 | 0.00 | 0.41 | 0.06 | 0.57 | -0.05 | 0.86 | 1.00 | isoamyl acetate-hydrolyzing esterase 1 homolog (S. cerevisiae) [Source:MGI Symbol;Acc:MGI:1914982]                 |
| ENSMUSG000000002702  | Slc12a1       | -0.67 | 0.00 | 0.00 | 0.12 | 0.48 | 1.00 | -0.10 | 0.53 | 1.00 | solute carrier family 12, member 1 [Source:MGI Symbol;Acc:MGI:103150]                                              |
| ENSMUSG000000038267  | Gm122a23      | -0.83 | 0.00 | 0.00 | 0.27 | 0.13 | 0.97 | -0.27 | 0.12 | 1.00 | solute carrier family 22, member 23 [Source:MGI Symbol;Acc:MGI:1920352]                                            |
| ENSMUSG0000000098329 | Gm14233       | -1.70 | 0.00 | 0.00 | 0.29 | 0.55 | 1.00 | 0.56  | 0.03 | 1.00 | predicted gene 14233 [Source:MGI Symbol;Acc:MGI:3705115]                                                           |
| ENSMUSG000000046603  | DEEN4402a     | -0.57 | 0.00 | 0.00 | 0.51 | 0.01 | 0.10 | 0.31  | 0.06 | 1.00 | DNA segment, Chr 9, ERATO D04_402, expressed [Source:MGI Symbol;Acc:MGI:196217]                                    |
| ENSMUSG000000004922  | Slc22a1       | -1.41 | 0.00 | 0.00 | 0.29 | 0.09 | 0.74 | 0.04  | 1.00 | 1.00 | protein phosphatase 1, regulatory subunit 1A [Source:MGI Symbol;Acc:MGI:2442401]                                   |
| ENSMUSG000000064138  | Fam72t        | -2.84 | 0.00 | 0.00 | 0.37 | 0.80 | 1.00 | -0.07 | 1.00 | 1.00 | family with sequence similarity 172, member A [Source:MGI Symbol;Acc:MGI:1915925]                                  |
| ENSMUSG000000028836  | Slc30a2       | -0.84 | 0.00 | 0.00 | 0.47 | 0.01 | 0.10 | 0.21  | 0.19 | 1.00 | solute carrier family 30 (zinc transporter), member 2 [Source:MGI Symbol;Acc:MGI:106637]                           |
| ENSMUSG000000029173  | Seppscs       | -0.89 | 0.00 | 0.00 | 0.29 | 0.15 | 1.00 | 0.07  | 0.71 | 1.00 | SeP (O-phosphoserine) tRNA:Sec (selenocysteine) tRNA synthase [Source:MGI Symbol;Acc:MGI:1098791]                  |
| ENSMUSG000000096917  | AC130841.1    | -1.61 | 0.00 | 0.00 | 0.69 | 0.09 | 0.74 | 0.05  | 0.93 | 1.00 | 0                                                                                                                  |
| ENSMUSG000000005142  | Man2b1        | -0.59 | 0.00 | 0.00 | 0.12 | 0.33 | 1.00 | -0.31 | 0.02 | 1.00 | mannosidase 2, alpha B1 [Source:MGI Symbol;Acc:MGI:107286]                                                         |
| ENSMUSG000000048371  | Fbp2          | -1.15 | 0.00 | 0.00 | 0.57 | 0.03 | 0.35 | 0.06  | 0.83 | 1.00 | pyruvate dehydrogenase phosphatase catalytic subunit 2 [Source:MGI Symbol;Acc:MGI:1918878]                         |
| ENSMUSG000000004922  | Ahd4          | -0.78 | 0.00 | 0.00 | 0.30 | 0.02 | 0.24 | 0.10  | 0.42 | 1.00 | lysine phosphatase 1 [Source:MGI Symbol;Acc:MGI:1915566]                                                           |
| ENSMUSG000000045962  | Wnk1          | -0.42 | 0.00 | 0.00 | 0.15 | 0.08 | 0.68 | 0.13  | 0.24 | 1.00 | WNK lysine deficient protein kinase 1 [Source:MGI Symbol;Acc:MGI:2442092]                                          |
| ENSMUSG000000009291  | Pttg1p        | -0.41 | 0.00 | 0.00 | 0.04 | 0.59 | 1.00 | -0.16 | 0.09 | 1.00 | pituitary tumor-transforming 1 interacting protein [Source:MGI Symbol;Acc:MGI:2852132]                             |
| ENSMUSG000000009603  | Gm17694       | -1.68 | 0.00 | 0.00 | 0.71 | 0.10 | 0.81 | -0.30 | 0.32 | 1.00 | predicted gene 7694 [Source:MGI Symbol;Acc:MGI:3649135]                                                            |
| ENSMUSG000000023861  | Mpc1          | -0.45 | 0.00 | 0.00 | 0.25 | 0.00 | 0.07 | 0.06  | 0.59 | 1.00 | mitochondrial pyruvate carrier 1 [Source:MGI Symbol;Acc:MGI:1915240]                                               |
| ENSMUSG000000021594  | Slr5a1        | -1.52 | 0.00 | 0.00 | 0.37 | 0.37 | 1.00 | -0.08 | 0.79 | 1.00 | steroid 5 alpha-reductase 1 [Source:MGI Symbol;Acc:MGI:98400]                                                      |
| ENSMUSG000000049560  | Wdr7          | -1.50 | 0.00 | 0.00 | 0.91 | 0.01 | 0.11 | 0.08  | 0.80 | 1.00 | WDR repeat domain 7 [Source:MGI Symbol;Acc:MGI:1860197]                                                            |
| ENSMUSG000000004922  | Slc12a1       | -0.69 | 0.00 | 0.00 | 0.12 | 0.48 | 1.00 | -0.10 | 0.53 | 1.00 | solute carrier family 12, member 1 [Source:MGI Symbol;Acc:MGI:103150]                                              |
| ENSMUSG000000029291  | Ryf3          | -0.87 | 0.00 | 0.00 | 0.33 | 0.10 | 0.80 | 0.03  | 0.88 | 1.00 | RUN and FYVE domain containing 3 [Source:MGI Symbol;Acc:MGI:106464]                                                |
| ENSMUSG000000020111  | Mcu1          | -0.96 | 0.00 | 0.00 | 0.61 | 0.00 | 0.06 |       |      |      |                                                                                                                    |

|                      |             |       |      |      |       |      |      |       |      |      |                                                                                                                          |
|----------------------|-------------|-------|------|------|-------|------|------|-------|------|------|--------------------------------------------------------------------------------------------------------------------------|
| ENSMUSG00000022672   | Pkdc        | -1.58 | 0.00 | 0.00 | 0.68  | 0.08 | 0.71 | 0.12  | 0.71 | 1.00 | protein kinase, DNA activated, catalytic polypeptide [Source:MGI Symbol:Acc:MGI:104779]                                  |
| ENSMUSG00000039218   | Sirm2       | -0.35 | 0.00 | 0.00 | 0.00  | 0.99 | 1.00 | -0.02 | 0.85 | 1.00 | serine/arginine repetitive matrix 2 [Source:MGI Symbol:Acc:MGI:1923206]                                                  |
| ENSMUSG00000006610   | Slc37a1     | -0.47 | 0.00 | 0.00 | 0.22  | 0.02 | 0.30 | 0.08  | 0.47 | 1.00 | solute carrier family 31, member 1 [Source:MGI Symbol:Acc:MGI:1333843]                                                   |
| ENSMUSG00000007162   | Slc2574     | -0.34 | 0.00 | 0.00 | 0.17  | 0.00 | 0.06 | 0.01  | 1.05 | 1.00 | predicted pseudogene 2574 [Source:MGI Symbol:Acc:MGI:1919096]                                                            |
| ENSMUSG00000035441   | Myo1d       | -0.97 | 0.00 | 0.00 | 0.16  | 0.56 | 1.00 | -0.11 | 0.64 | 1.00 | myosin ID [Source:MGI Symbol:Acc:MGI:107728]                                                                             |
| ENSMUSG000000081772  | Gm13131     | -1.06 | 0.00 | 0.00 | 0.62  | 0.01 | 0.21 | 0.16  | 0.45 | 1.00 | predicted gene 13131 [Source:MGI Symbol:Acc:MGI:3651062]                                                                 |
| ENSMUSG00000017978   | Cadps2      | -2.57 | 0.00 | 0.00 | 0.39  | 0.77 | 1.00 | 0.06  | 1.00 | 1.00 | Ca <sup>2+</sup> -dependent activator protein for secretion 2 [Source:MGI Symbol:Acc:MGI:2443963]                        |
| ENSMUSG000000020623  | Map2k6      | -1.45 | 0.00 | 0.00 | 0.69  | 0.07 | 0.66 | 0.11  | 0.66 | 1.00 | mitogen-activated protein kinase kinase 6 [Source:MGI Symbol:Acc:MGI:1346870]                                            |
| ENSMUSG00000006574   | Slc4a1      | -0.95 | 0.00 | 0.00 | 0.13  | 0.63 | 1.00 | -0.15 | 0.51 | 1.00 | solute carrier family 4 (anion exchanger), member 1 [Source:MGI Symbol:Acc:MGI:109393]                                   |
| ENSMUSG00000025404   | R3hdm2      | -0.69 | 0.00 | 0.00 | 0.44  | 0.00 | 0.07 | 0.01  | 0.97 | 1.00 | R3H domain containing 2 [Source:MGI Symbol:Acc:MGI:1919000]                                                              |
| ENSMUSG00000007162   | Slc2574     | -1.10 | 0.00 | 0.00 | 0.17  | 0.06 | 0.06 | 0.01  | 1.05 | 1.00 | predicted pseudogene 2574 [Source:MGI Symbol:Acc:MGI:1919096]                                                            |
| ENSMUSG00000006468   | Slc34a3     | -0.91 | 0.00 | 0.00 | 0.44  | 0.05 | 0.49 | -0.24 | 0.21 | 1.00 | solute carrier family 34 (sodium phosphate), member 3 [Source:MGI Symbol:Acc:MGI:2159410]                                |
| ENSMUSG000000029819  | Npy         | -1.22 | 0.00 | 0.00 | 0.40  | 0.25 | 1.00 | -0.19 | 0.51 | 1.00 | neuropeptide Y [Source:MGI Symbol:Acc:MGI:97374]                                                                         |
| ENSMUSG000000079501  | Gm5138      | -0.33 | 0.00 | 0.00 | 0.17  | 0.01 | 0.12 | 0.00  | 0.98 | 1.00 | predicted gene 5138 [Source:MGI Symbol:Acc:MGI:3779464]                                                                  |
| ENSMUSG000000041144  | Dnahc7b     | -2.46 | 0.00 | 0.00 | 0.65  | 0.45 | 1.00 | -0.05 | 1.00 | 1.00 | dynein, axonemal, heavy chain 7B [Source:MGI Symbol:Acc:MGI:2684953]                                                     |
| ENSMUSG000000032076  | Cadm1       | -1.45 | 0.00 | 0.00 | 0.62  | 0.61 | 1.00 | 0.16  | 0.70 | 1.00 | cell adhesion molecule 1 [Source:MGI Symbol:Acc:MGI:189272]                                                              |
| ENSMUSG000000085297  | Gm11651     | -2.37 | 0.00 | 0.00 | 0.23  | 0.61 | 1.00 | -0.02 | 1.00 | 1.00 | predicted gene 11651 [Source:MGI Symbol:Acc:MGI:3651203]                                                                 |
| ENSMUSG000000022419  | Arlks1      | -0.84 | 0.00 | 0.00 | 0.39  | 0.06 | 0.57 | -0.27 | 0.14 | 1.00 | ankyrin repeat and SAM domain containing 1 [Source:MGI Symbol:Acc:MGI:2446180]                                           |
| ENSMUSG000000020309  | Chac2       | -0.91 | 0.00 | 0.00 | 0.41  | 0.06 | 0.60 | 0.19  | 0.31 | 1.00 | Chac, cation transport regulator 2 [Source:MGI Symbol:Acc:MGI:1915294]                                                   |
| ENSMUSG000000034108  | Ccs         | -0.61 | 0.00 | 0.00 | 0.33  | 0.01 | 0.20 | 0.05  | 0.77 | 1.00 | copper chaperone for superoxide dismutase [Source:MGI Symbol:Acc:MGI:1333783]                                            |
| ENSMUSG000000056666  | Retsat      | -0.54 | 0.00 | 0.00 | 0.30  | 0.01 | 0.12 | -0.12 | 0.36 | 1.00 | retinol saturase (all trans retinol 13,14 reductase) [Source:MGI Symbol:Acc:MGI:1914692]                                 |
| ENSMUSG000000030621  | Mea3        | -0.84 | 0.00 | 0.00 | 0.11  | 0.67 | 1.00 | -0.05 | 0.86 | 1.00 | malic enzyme 3, NAD(P) <sup>+</sup> -dependent, mitochondrial [Source:MGI Symbol:Acc:MGI:1916679]                        |
| ENSMUSG000000031283  | Chrd1l      | -2.28 | 0.00 | 0.00 | 1.33  | 0.04 | 0.40 | -0.46 | 0.18 | 1.00 | chordin-like 1 [Source:MGI Symbol:Acc:MGI:1933172]                                                                       |
| ENSMUSG000000019845  | 1700040L2Rk | -2.21 | 0.00 | 0.00 | 0.49  | 0.50 | 1.00 | 0.09  | 0.90 | 1.00 | RIKEN cDNA 1700040L2 gene [Source:MGI Symbol:Acc:MGI:1920537]                                                            |
| ENSMUSG000000032956  | Lmi2        | -0.80 | 0.00 | 0.00 | 0.53  | 0.00 | 0.07 | 0.07  | 0.71 | 1.00 | myeloid lymphoid leukemia 3 [Source:MGI Symbol:Acc:MGI:2444959]                                                          |
| ENSMUSG000000053303  | Slc22a26    | -1.27 | 0.00 | 0.00 | -0.10 | 0.71 | 1.00 | 0.27  | 0.91 | 1.00 | solute carrier family 22 (organic cation transporter), member 26 [Source:MGI Symbol:Acc:MGI:2385316]                     |
| ENSMUSG000000027706  | Sec2a       | -0.38 | 0.00 | 0.00 | 0.20  | 0.01 | 0.16 | 0.08  | 0.44 | 1.00 | SEC22 homolog (S. cerevisiae) [Source:MGI Symbol:Acc:MGI:1916526]                                                        |
| ENSMUSG000000037470  | Enpp1       | -1.00 | 0.00 | 0.00 | 0.40  | 0.11 | 0.88 | -0.11 | 0.63 | 1.00 | ectonucleotide pyrophosphatase/phosphodiesterase 1 [Source:MGI Symbol:Acc:MGI:97370]                                     |
| ENSMUSG000000079484  | Phyh1       | -0.72 | 0.00 | 0.00 | 0.41  | 0.01 | 0.14 | -0.07 | 0.65 | 1.00 | phytanoyl-CoA dioxygenase domain containing 1 [Source:MGI Symbol:Acc:MGI:3612986]                                        |
| ENSMUSG000000027601  | Mif1        | -0.56 | 0.00 | 0.00 | 0.24  | 0.06 | 0.56 | 0.11  | 0.41 | 1.00 | mitochondrial fission regulator 1 [Source:MGI Symbol:Acc:MGI:1914722]                                                    |
| ENSMUSG000000022875  | Kng1        | -1.04 | 0.00 | 0.00 | 0.22  | 0.46 | 1.00 | -0.08 | 0.77 | 1.00 | kininogen 1 [Source:MGI Symbol:Acc:MGI:1097705]                                                                          |
| ENSMUSG000000023959  | Cmlt2       | -0.80 | 0.00 | 0.00 | 0.26  | 0.25 | 1.00 | -0.24 | 0.25 | 1.00 | RF-3a protein 2 [Source:MGI Symbol:Acc:MGI:1924223]                                                                      |
| ENSMUSG000000025616  | Tm9d3       | -0.38 | 0.00 | 0.00 | 0.21  | 0.01 | 0.10 | 0.13  | 0.15 | 1.00 | transmembrane 9 superfamily member 3 [Source:MGI Symbol:Acc:MGI:1914262]                                                 |
| ENSMUSG000000002029  | Atp6v1b1    | -0.73 | 0.00 | 0.00 | 0.24  | 0.17 | 1.00 | -0.02 | 0.93 | 1.00 | ATPase, H <sup>+</sup> transporting, lysosomal V1 subunit B1 [Source:MGI Symbol:Acc:MGI:103285]                          |
| ENSMUSG000000025728  | Piqg        | -0.44 | 0.00 | 0.00 | 0.20  | 0.04 | 0.45 | 0.00  | 1.00 | 1.00 | phosphatidylinositol glycan anchor biosynthesis, class Q [Source:MGI Symbol:Acc:MGI:1333114]                             |
| ENSMUSG000000016252  | Atp5e       | -0.56 | 0.00 | 0.00 | 0.31  | 0.00 | 0.05 | 0.06  | 0.65 | 1.00 | ATP synthase, H <sup>+</sup> transporting, mitochondrial F1 complex, epsilon subunit [Source:MGI Symbol:Acc:MGI:1855697] |
| ENSMUSG000000021615  | Xcc3        | -2.53 | 0.00 | 0.00 | 0.74  | 0.42 | 1.00 | -0.02 | 1.00 | 1.00 | X-ray repair complementing defective repair in Chinese hamster cells 4 [Source:MGI Symbol:Acc:MGI:1333799]               |
| ENSMUSG000000086800  | C03000K06Rk | -1.70 | 0.00 | 0.00 | 0.93  | 0.05 | 0.55 | 0.04  | 1.00 | 1.00 | RIKEN cDNA C03000K06 gene [Source:MGI Symbol:Acc:MGI:1925945]                                                            |
| ENSMUSG000000029196  | Cnfp        | -0.80 | 0.00 | 0.00 | 0.16  | 0.05 | 0.55 | -0.13 | 1.00 | 1.00 | myosin phosphatase Rho interacting protein [Source:MGI Symbol:Acc:MGI:1349438]                                           |
| ENSMUSG000000071412  | Cm4b        | -1.29 | 0.00 | 0.00 | 0.27  | 0.42 | 1.00 | 0.10  | 1.00 | 1.00 | calcium channel, voltage-dependent, beta 4 subunit [Source:MGI Symbol:Acc:MGI:103301]                                    |
| ENSMUSG000000064346  | mt-Tv       | -1.97 | 0.00 | 0.00 | -1.59 | 0.00 | 0.00 | 0.13  | 0.82 | 1.00 | mitochondrially encoded RNA cytophan [Source:MGI Symbol:Acc:MGI:102471]                                                  |
| ENSMUSG000000051355  | Comm1d      | -0.65 | 0.00 | 0.00 | 0.06  | 0.76 | 1.00 | 0.00  | 1.00 | 1.00 | COMM domain containing 1 [Source:MGI Symbol:Acc:MGI:109474]                                                              |
| ENSMUSG000000036792  | Mbd5        | -1.75 | 0.00 | 0.00 | 0.78  | 0.12 | 0.90 | 0.06  | 0.92 | 1.00 | methyl-CpG binding domain protein 5 [Source:MGI Symbol:Acc:MGI:2138934]                                                  |
| ENSMUSG000000029650  | Slc46a3     | -1.74 | 0.00 | 0.00 | 0.59  | 0.32 | 1.00 | 0.24  | 0.47 | 1.00 | solute carrier family 46, member 3 [Source:MGI Symbol:Acc:MGI:1918956]                                                   |
| ENSMUSG000000022338  | Ely2        | -0.70 | 0.00 | 0.00 | 0.24  | 0.16 | 1.00 | 0.09  | 0.59 | 1.00 | enhancer of yellow 2 homolog (Drosophila) [Source:MGI Symbol:Acc:MGI:1919286]                                            |
| ENSMUSG000000005514  | Chmp1       | -0.42 | 0.00 | 0.00 | 0.08  | 0.37 | 1.00 | 0.10  | 0.35 | 1.00 | P450 (cytochrome) oxidoreductase [Source:MGI Symbol:Acc:MGI:37744]                                                       |
| ENSMUSG000000029186  | Pdgfrd      | -1.78 | 0.00 | 0.00 | 0.27  | 0.80 | 1.00 | -0.09 | 0.91 | 1.00 | platelet-derived growth factor, D receptor [Source:MGI Symbol:Acc:MGI:1919035]                                           |
| ENSMUSG000000024228  | Nudt12      | -0.73 | 0.00 | 0.00 | 0.25  | 0.16 | 1.00 | 0.05  | 0.77 | 1.00 | nucleic acid (nucleoside diphosphate linked moiety X)-type motif 12 [Source:MGI Symbol:Acc:MGI:1915243]                  |
| ENSMUSG000000043300  | B3galt1     | -2.04 | 0.00 | 0.00 | 0.36  | 0.68 | 1.00 | -0.05 | 1.00 | 1.00 | UDP-GalNAc:beta-GlcNAc beta 1-3-galactosaminyltransferase, polypeptide 1 [Source:MGI Symbol:Acc:MGI:1349405]             |
| ENSMUSG000000087303  | Lipo2       | -2.08 | 0.00 | 0.00 | 0.34  | 0.66 | 1.00 | 0.04  | 1.00 | 1.00 | lipase, member O2 [Source:MGI Symbol:Acc:MGI:3644466]                                                                    |
| ENSMUSG000000071528  | Usmg5       | -0.58 | 0.00 | 0.00 | 0.32  | 0.01 | 0.14 | 0.15  | 0.26 | 1.00 | upregulated during skeletal muscle growth 5 [Source:MGI Symbol:Acc:MGI:1891435]                                          |
| ENSMUSG000000031483  | Eflin2      | -0.49 | 0.00 | 0.00 | 0.23  | 0.04 | 0.41 | 0.08  | 0.51 | 1.00 | ER lipid raft associated 2 [Source:MGI Symbol:Acc:MGI:2387215]                                                           |
| ENSMUSG000000023990  | Cm9f        | -0.64 | 0.00 | 0.00 | 0.31  | 0.04 | 0.43 | -0.25 | 0.10 | 1.00 | cyclin-dependent kinase-like 1 (CDC2-related kinase) [Source:MGI Symbol:Acc:MGI:1918341]                                 |
| ENSMUSG000000028291  | Cm3339      | -0.32 | 0.00 | 0.00 | 0.27  | 0.01 | 0.12 | -0.02 | 0.64 | 1.00 | predicted gene 3339 [Source:MGI Symbol:Acc:MGI:3650221]                                                                  |
| ENSMUSG000000029823  | Luc7l2      | -0.46 | 0.00 | 0.00 | 0.26  | 0.01 | 0.15 | 0.03  | 0.81 | 1.00 | LUC7-like 2 (S. cerevisiae) [Source:MGI Symbol:Acc:MGI:2183260]                                                          |
| ENSMUSG000000049799  | Gm11602     | -0.79 | 0.00 | 0.00 | 0.37  | 0.06 | 0.56 | 0.12  | 0.52 | 1.00 | predicted gene 11602 [Source:MGI Symbol:Acc:MGI:3651861]                                                                 |
| ENSMUSG000000026526  | Fh1         | -0.42 | 0.00 | 0.00 | 0.26  | 0.00 | 0.05 | 0.08  | 0.41 | 1.00 | fumarate hydratase 1 [Source:MGI Symbol:Acc:MGI:95530]                                                                   |
| ENSMUSG000000029534  | Sl7         | -1.73 | 0.00 | 0.00 | 0.73  | 0.15 | 1.00 | 0.06  | 0.92 | 1.00 | suppression of tumorigenicity 7 [Source:MGI Symbol:Acc:MGI:1927405]                                                      |
| ENSMUSG000000046314  | Sbbp6       | -1.27 | 0.00 | 0.00 | 0.87  | 0.01 | 0.10 | -0.05 | 0.93 | 1.00 | xrann binding protein 6 (arnixin) [Source:MGI Symbol:Acc:MGI:2384963]                                                    |
| ENSMUSG000000055500  | Fmnl1       | -0.63 | 0.00 | 0.00 | 0.28  | 0.05 | 0.55 | 0.24  | 0.99 | 1.00 | formin-like 1 [Source:MGI Symbol:Acc:MGI:1888994]                                                                        |
| ENSMUSG00000001180   | Tm9d3       | -0.43 | 0.00 | 0.00 | 0.27  | 0.80 | 1.00 | -0.22 | 0.91 | 1.00 | transmembrane protein 9 (five membrane-spanning domains) [Source:MGI Symbol:Acc:MGI:1926283]                             |
| ENSMUSG000000007243  | Gm10358     | -0.33 | 0.00 | 0.00 | 0.17  | 0.01 | 0.17 | 0.03  | 0.98 | 1.00 | predicted gene 10358 [Source:MGI Symbol:Acc:MGI:3708786]                                                                 |
| ENSMUSG000000028136  | Snu27       | -0.60 | 0.00 | 0.00 | 0.31  | 0.03 | 0.37 | 0.19  | 0.18 | 1.00 | sorting nexin family member 27 [Source:MGI Symbol:Acc:MGI:1923992]                                                       |
| ENSMUSG000000029161  | Cgref1      | -0.48 | 0.00 | 0.00 | 0.15  | 0.16 | 1.00 | -0.06 | 0.63 | 1.00 | cell growth regulator with EF hand domain 1 [Source:MGI Symbol:Acc:MGI:1915817]                                          |
| ENSMUSG000000081933  | Gm14767     | -1.80 | 0.00 | 0.00 | 1.10  | 0.02 | 0.26 | 0.24  | 0.52 | 1.00 | predicted gene 14767 [Source:MGI Symbol:Acc:MGI:3705402]                                                                 |
| ENSMUSG000000020857  | Nme2        | -0.42 | 0.00 | 0.00 | 0.17  | 0.01 | 0.21 | 0.01  | 0.95 | 1.00 | NME/NM2 nucleoside diphosphate kinase 2 [Source:MGI Symbol:Acc:MGI:97356]                                                |
| ENSMUSG000000028944  | Hag2        | -0.98 | 0.00 | 0.00 | 0.53  | 0.03 | 0.38 | -0.18 | 0.43 | 1.00 | nuclear transport factor 2-like export factor 2 [Source:MGI Symbol:Acc:MGI:1336153]                                      |
| ENSMUSG000000029182  | Chchd2      | -0.67 | 0.00 | 0.00 | 0.28  | 0.09 | 0.75 | -0.06 | 0.64 | 1.00 | chondrichthyan homeobox domain containing 2 [Source:MGI Symbol:Acc:MGI:1072631]                                          |
| ENSMUSG0000000033769 | Evoc6b      | -1.50 | 0.00 | 0.00 | 0.28  | 0.66 | 1.00 | 0.04  | 1.00 | 1.00 | exocyst complex component 6B [Source:MGI Symbol:Acc:MGI:1923164]                                                         |
| ENSMUSG000000022490  | Ppp1r1a     | -0.61 | 0.00 | 0.00 | 0.02  | 0.95 | 1.00 | -0.08 | 0.58 | 1.00 | protein phosphatase 1, regulatory (inhibitor) subunit 1A [Source:MGI Symbol:Acc:MGI:1889595]                             |
| ENSMUSG000000002365  | Snu9        | -0.64 | 0.00 | 0.00 | 0.25  | 0.11 | 0.84 | -0.03 | 0.86 | 1.00 | sorting nexin 9 [Source:MGI Symbol:Acc:MGI:1913866]                                                                      |
| ENSMUSG000000041248  | Kcnj1       | -0.46 | 0.00 | 0.00 | 0.08  | 0.50 | 1.00 | 0.04  | 0.92 | 1.00 | potassium inwardly-rectifying channel, subfamily J, member 1 [Source:MGI Symbol:Acc:MGI:1922748]                         |
| ENSMUSG000000003559  | As3mt       | -0.70 | 0.00 | 0.00 | 0.38  | 0.03 | 0.36 | -0.03 | 0.72 | 1.00 | arsenic (+3 oxidation state) methyltransferase [Source:MGI Symbol:Acc:MGI:1929882]                                       |
| ENSMUSG000000042771  | Nkx2        | -0.70 | 0.00 | 0.00 | 0.31  | 0.08 | 0.70 | 0.06  | 0.77 | 1.00 | nuclear transport factor 2-like export factor 2 [Source:MGI Symbol:Acc:MGI:2147914]                                      |
| ENSMUSG000000002924  | Ctcf1b2     | -0.83 | 0.00 | 0.00 | 0.27  | 0.09 | 0.72 | -0.06 | 0.64 | 1.00 | transmembrane protein 2 [Source:MGI Symbol:Acc:MGI:1919900]                                                              |
| ENSMUSG000000009664  | Gstk1       | -0.76 | 0.00 | 0.00 | 0.44  | 0.02 | 0.28 | -0.11 | 0.57 | 1.00 | glutathione S-transferase kappa 1 [Source:MGI Symbol:Acc:MGI:1923513]                                                    |
| ENSMUSG000000093245  | SNORD59     | -0.48 | 0.00 | 0.00 | 0.22  | 0.05 | 0.52 | 0.11  | 0.35 | 1.00 | Small nuclear RNA SNORD59 [Source:RFAM:Acc:RF00273]                                                                      |
| ENSMUSG000000021000  | Ctag5       | -0.38 | 0.00 | 0.00 | 0.14  | 0.08 | 0.72 | 0.07  | 0.48 | 1.00 | CTAGE family, member 5 [Source:MGI Symbol:Acc:MGI:1346056]                                                               |
| ENSMUSG000000026185  | Igf1bp5     | -0.65 | 0.00 | 0.00 | -0.04 | 0.71 | 1.00 | -0.18 | 0.27 | 1.00 | insulin-like growth factor binding protein 5 [Source:MGI Symbol:Acc:MGI:96440]                                           |
| ENSMUSG000000028834  | Trim63      | -1.67 | 0.00 | 0.00 | 0.74  | 0.12 | 0.90 | 0.03  | 1.00 | 1.00 | tripartite motif-containing 63 [Source:MGI Symbol:Acc:MGI:2447992]                                                       |
| ENSMUSG000000021327  | Zkscan3     | -0.63 | 0.00 | 0.00 | 0.20  | 0.19 | 1.00 | 0.00  | 1.00 | 1.00 | zinc finger with KRAB and SCAN domains 3 [Source:MGI Symbol:Acc:MGI:1919989]                                             |
| ENSMUSG000000000823  | Lmo2        | -1.40 | 0.00 | 0.00 | 0.27  | 0.03 | 0.33 | -0.28 | 0.42 | 1.00 | limb domain protein 2 [Source:MGI Symbol:Acc:MGI:1919900]                                                                |
| ENSMUSG000000028618  | Tmem59      | -0.36 | 0.00 | 0.00 | 0.20  | 0.01 | 0.14 | 0.03  | 0.75 | 1.00 | transmembrane protein 59 [Source:MGI Symbol:Acc:MGI:1929278]                                                             |
| ENSMUSG000000028488  | Sh3gl2      | -1.54 | 0.00 | 0.00 | 0.42  | 0.37 | 1.00 |       |      |      |                                                                                                                          |

|                      |              |       |      |       |      |      |      |       |      |      |                                                                                                                                   |
|----------------------|--------------|-------|------|-------|------|------|------|-------|------|------|-----------------------------------------------------------------------------------------------------------------------------------|
| ENSMUSG00000039047   | Pik3         | -0.75 | 0.00 | 0.00  | 0.38 | 0.07 | 0.64 | 0.10  | 0.60 | 1.00 | phosphatidylinositol glycan anchor biosynthesis, class K [Source:MGI Symbol:Acc.MGI:1913863]                                      |
| ENSMUSG00000048414   | RP23-74N15.4 | -1.65 | 0.00 | 0.00  | 0.47 | 0.41 | 1.00 | -0.47 | 0.19 | 1.00 | 0                                                                                                                                 |
| ENSMUSG00000048251   | Bcl11b       | -1.83 | 0.00 | 0.00  | 1.36 | 0.01 | 0.17 | -0.04 | 1.00 | 1.00 | B cell leukemia/lymphoma 11B [Source:MGI Symbol:Acc.MGI:1929313]                                                                  |
| ENSMUSG00000004821   | Islr2        | -0.56 | 0.00 | 0.00  | 0.33 | 0.02 | 0.23 | -0.04 | 1.00 | 1.00 | immunoglobulin-like domain containing receptor 2 [Source:MGI Symbol:Acc.MGI:1196370]                                              |
| ENSMUSG00000005089   | Slc1a2       | -2.26 | 0.00 | 0.00  | 0.70 | 0.33 | 1.00 | -0.18 | 0.78 | 1.00 | solute carrier family 1 (glial high affinity glutamate transporter), member 2 [Source:MGI Symbol:Acc.MGI:101931]                  |
| ENSMUSG00000029247   | Paics        | -0.37 | 0.00 | 0.00  | 0.25 | 0.00 | 0.07 | 0.06  | 0.53 | 1.00 | phosphoribosylaminimidazole carboxylase, glutathioneS-transferase, succinocarbonyl synthetase [Source:MGI Symbol:Acc.MGI:1914304] |
| ENSMUSG00000005294   | Cyp2f2       | -2.02 | 0.00 | 0.00  | 0.71 | 0.29 | 1.00 | -0.46 | 0.33 | 1.00 | cytochrome P450, family 2, subfamily 1, polypeptide 2 [Source:MGI Symbol:Acc.MGI:88608]                                           |
| ENSMUSG00000003963   | Echdc3       | -0.86 | 0.00 | 0.00  | 0.46 | 0.04 | 0.47 | -0.07 | 0.74 | 1.00 | enoyl Coenzyme A hydratase domain containing 3 [Source:MGI Symbol:Acc.MGI:1915106]                                                |
| ENSMUSG00000003287   | Nlyc         | -0.63 | 0.00 | 0.00  | 0.32 | 0.04 | 0.45 | -0.05 | 0.79 | 1.00 | nuclear transcription factor-Y gamma [Source:MGI Symbol:Acc.MGI:107901]                                                           |
| ENSMUSG00000002797   | Tfrc         | -0.64 | 0.00 | -0.24 | 0.18 | 1.00 | 0.08 | 0.67  | 0.60 | 1.00 | transferrin receptor [Source:MGI Symbol:Acc.MGI:98822]                                                                            |
| ENSMUSG00000004813   | Islr1        | -0.49 | 0.00 | 0.00  | 0.33 | 0.09 | 0.74 | -0.04 | 0.94 | 1.00 | immunoglobulin-like domain containing receptor 1 [Source:MGI Symbol:Acc.MGI:101937]                                               |
| ENSMUSG00000025169   | 111003102Rk  | -1.09 | 0.00 | 0.00  | 0.44 | 0.18 | 1.00 | 0.07  | 0.87 | 1.00 | RIKEN cDNA 111003102 gene [Source:MGI Symbol:Acc.MGI:1913429]                                                                     |
| ENSMUSG000000025825  | Isou         | -0.42 | 0.00 | 0.00  | 0.14 | 0.17 | 1.00 | -0.08 | 0.50 | 1.00 | IscU iron-sulfur cluster scaffold homolog (E. coli) [Source:MGI Symbol:Acc.MGI:1913633]                                           |
| ENSMUSG000000038417  | Fig4         | -1.11 | 0.00 | 0.00  | 0.67 | 0.02 | 0.27 | -0.05 | 0.87 | 1.00 | FIG4 homolog (S. cerevisiae) [Source:MGI Symbol:Acc.MGI:2143585]                                                                  |
| ENSMUSG000000028132  | Tmem56       | -0.90 | 0.00 | 0.00  | 0.16 | 0.55 | 1.00 | 0.03  | 0.95 | 1.00 | transmembrane protein 56 [Source:MGI Symbol:Acc.MGI:1923195]                                                                      |
| ENSMUSG000000030549  | Rhcg         | -0.64 | 0.00 | 0.00  | 0.26 | 0.11 | 0.85 | -0.05 | 0.79 | 1.00 | Rhesus blood group-associated C glycoprotein [Source:MGI Symbol:Acc.MGI:1888517]                                                  |
| ENSMUSG000000021240  | Abcc4        | -0.81 | 0.00 | 0.00  | 0.07 | 0.81 | 1.00 | -0.19 | 0.35 | 1.00 | ATP-binding cassette, sub-family D (ALD), member 4 [Source:MGI Symbol:Acc.MGI:1349217]                                            |
| ENSMUSG000000030352  | Tspan9       | -0.69 | 0.00 | 0.00  | 0.33 | 0.08 | 0.71 | -0.22 | 0.24 | 1.00 | tetraspanin 9 [Source:MGI Symbol:Acc.MGI:1924558]                                                                                 |
| ENSMUSG000000059734  | Ndufs8       | -0.51 | 0.00 | 0.00  | 0.30 | 0.01 | 0.19 | 0.09  | 0.50 | 1.00 | NADH dehydrogenase (ubiquinone) Fe-S protein 8 [Source:MGI Symbol:Acc.MGI:2385079]                                                |
| ENSMUSG000000004245  | Ndfip1       | -0.43 | 0.00 | 0.00  | 0.17 | 1.00 | 0.83 | 0.06  | 0.62 | 1.00 | Nedd4 family interacting protein 1 [Source:MGI Symbol:Acc.MGI:1929601]                                                            |
| ENSMUSG000000023266  | Frs3         | -1.25 | 0.00 | 0.00  | 0.65 | 0.07 | 0.63 | -0.10 | 0.78 | 1.00 | fibroblast growth factor receptor substrate 3 [Source:MGI Symbol:Acc.MGI:2135965]                                                 |
| ENSMUSG000000004370  | Lym5         | -0.64 | 0.00 | 0.00  | 0.37 | 0.02 | 0.28 | 0.10  | 0.55 | 1.00 | Lyr motif containing 5 [Source:MGI Symbol:Acc.MGI:1914886]                                                                        |
| ENSMUSG000000003174  | Mgl1         | -0.96 | 0.00 | 0.00  | 0.34 | 0.21 | 1.00 | -0.27 | 0.28 | 1.00 | monoglyceride lipase [Source:MGI Symbol:Acc.MGI:1346042]                                                                          |
| ENSMUSG000000041921  | Melap1d      | -0.81 | 0.00 | 0.00  | 0.49 | 0.03 | 0.33 | -0.14 | 0.47 | 1.00 | methionyl aminopeptidase type 1D (mitochondrial) [Source:MGI Symbol:Acc.MGI:1913809]                                              |
| ENSMUSG000000021830  | Tm6b16       | -0.71 | 0.00 | 0.00  | 0.37 | 0.10 | 0.63 | 0.06  | 0.85 | 1.00 | thioredoxin domain containing 16 [Source:MGI Symbol:Acc.MGI:1917811]                                                              |
| ENSMUSG00000007931   | Gm3222       | -0.37 | 0.00 | 0.00  | 0.18 | 0.05 | 0.05 | -0.02 | 1.00 | 1.00 | predicted gene 3222 [Source:MGI Symbol:Acc.MGI:3781401]                                                                           |
| ENSMUSG000000003854  | Supt3h       | -2.54 | 0.00 | 0.00  | 0.08 | 1.00 | 1.00 | -0.02 | 1.00 | 1.00 | suppressor of Ty 3 homolog (S. cerevisiae) [Source:MGI Symbol:Acc.MGI:1923723]                                                    |
| ENSMUSG00000007979   | -            | -0.35 | 0.00 | 0.00  | 0.16 | 0.04 | 0.41 | 0.00  | 0.99 | 1.00 | 0                                                                                                                                 |
| ENSMUSG000000071711  | Mpst         | -0.64 | 0.00 | 0.00  | 0.33 | 0.04 | 0.43 | -0.03 | 0.89 | 1.00 | mercaptopyruvate sulfurtransferase [Source:MGI Symbol:Acc.MGI:2179733]                                                            |
| ENSMUSG000000030172  | Erc1         | -1.16 | 0.00 | 0.00  | 0.59 | 0.06 | 0.60 | -0.30 | 0.25 | 1.00 | ELKS/RAB6-interacting/CAST family member 1 [Source:MGI Symbol:Acc.MGI:2151013]                                                    |
| ENSMUSG000000018668  | Insz2        | -0.74 | 0.00 | 0.00  | 0.34 | 0.11 | 0.85 | 0.13  | 0.46 | 1.00 | integrator complex subunit 2 [Source:MGI Symbol:Acc.MGI:1917672]                                                                  |
| ENSMUSG000000007519  | Tp2p2        | -0.71 | 0.00 | 0.00  | 0.39 | 0.02 | 0.29 | -0.02 | 1.00 | 1.00 | transcription factor Tp 2 [Source:MGI Symbol:Acc.MGI:107107]                                                                      |
| ENSMUSG000000005619  | Cdnp1        | -1.84 | 0.00 | 0.00  | 1.04 | 0.06 | 0.57 | 0.03  | 1.00 | 1.00 | CDNK5 regulatory subunit associated protein 1-like 1 [Source:MGI Symbol:Acc.MGI:1921765]                                          |
| ENSMUSG000000002404  | Epb4.1i3     | -1.34 | 0.00 | 0.00  | 0.10 | 0.89 | 1.00 | -0.22 | 0.54 | 1.00 | erythrocyte protein band 4.1-like 3 [Source:MGI Symbol:Acc.MGI:103008]                                                            |
| ENSMUSG000000058446  | Znr2         | -0.43 | 0.00 | 0.00  | 0.12 | 0.28 | 1.00 | 0.23  | 0.04 | 1.00 | zinc and ring finger 2 [Source:MGI Symbol:Acc.MGI:1196246]                                                                        |
| ENSMUSG000000057229  | Atp5s1       | -0.63 | 0.00 | 0.00  | 0.31 | 0.05 | 0.52 | 0.02  | 0.96 | 1.00 | ATP5S-like [Source:MGI Symbol:Acc.MGI:1913599]                                                                                    |
| ENSMUSG000000031555  | Adam9        | -0.58 | 0.00 | 0.00  | 0.29 | 0.06 | 0.55 | 0.10  | 0.53 | 1.00 | a disintegrin and metalloprotease domain 9 (meltrin gamma) [Source:MGI Symbol:Acc.MGI:105376]                                     |
| ENSMUSG000000002456  | Ap9b9        | -0.81 | 0.00 | 0.00  | 0.48 | 0.03 | 0.34 | -0.05 | 0.84 | 1.00 | ATPase, class II, type 9B [Source:MGI Symbol:Acc.MGI:1354757]                                                                     |
| ENSMUSG000000003678  | Ucp2         | -1.17 | 0.00 | 0.00  | 0.47 | 0.02 | 0.27 | -0.05 | 0.62 | 1.00 | UCP2 [Source:MGI Symbol:Acc.MGI:3645099]                                                                                          |
| ENSMUSG000000028393  | Alad         | -0.43 | 0.00 | 0.00  | 0.16 | 0.13 | 0.99 | 0.15  | 0.20 | 1.00 | amino-leucinate, delta-, dehydratase [Source:MGI Symbol:Acc.MGI:96853]                                                            |
| ENSMUSG000000009282  | AL928551.1   | -2.20 | 0.00 | 0.00  | 0.70 | 0.45 | 1.00 | -0.05 | 1.00 | 1.00 | 0                                                                                                                                 |
| ENSMUSG000000022761  | Lzr1         | -0.41 | 0.00 | 0.00  | 0.20 | 0.04 | 0.43 | -0.10 | 0.35 | 1.00 | leucine-zipper-like transcriptional regulator, 1 [Source:MGI Symbol:Acc.MGI:1914111]                                              |
| ENSMUSG0000000039458 | Mtmr12       | -0.69 | 0.00 | 0.00  | 0.34 | 0.07 | 0.64 | -0.09 | 0.66 | 1.00 | myotubularin related protein 12 [Source:MGI Symbol:Acc.MGI:2443034]                                                               |
| ENSMUSG000000031549  | Ido2         | -1.66 | 0.00 | 0.00  | 0.31 | 0.72 | 1.00 | -0.13 | 0.73 | 1.00 | indoleamine 2,3-dioxygenase 2 [Source:MGI Symbol:Acc.MGI:2142489]                                                                 |
| ENSMUSG000000002454  | D18Erd653e   | -1.86 | 0.00 | 0.00  | 1.02 | 0.03 | 0.37 | -0.02 | 1.00 | 1.00 | DNA segment, Chr 18, ERATO Doi 653, expressed [Source:MGI Symbol:Acc.MGI:1277150]                                                 |
| ENSMUSG000000031012  | Cask         | -1.64 | 0.00 | 0.00  | 0.54 | 0.31 | 1.00 | -0.11 | 0.62 | 1.00 | calcium/calmodulin-dependent serine protein kinase (MAPK/JNK family) [Source:MGI Symbol:Acc.MGI:1309489]                          |
| ENSMUSG000000003953  | Agouti       | -1.60 | 0.00 | 0.00  | 0.32 | 0.24 | 1.00 | -0.03 | 0.60 | 1.00 | alpha-1,4-N-acetylglucosaminyl transferase 1 [Source:MGI Symbol:Acc.MGI:2143261]                                                  |
| ENSMUSG000000004210  | Abhd14a      | -0.93 | 0.00 | 0.00  | 0.55 | 0.03 | 0.34 | -0.03 | 0.94 | 1.00 | aldehyde dehydrogenase domain containing 14A [Source:MGI Symbol:Acc.MGI:1915894]                                                  |
| ENSMUSG000000008283  | Gm15373      | -1.06 | 0.00 | 0.00  | 0.40 | 0.18 | 1.00 | -0.25 | 0.35 | 1.00 | predicted gene 15373 [Source:MGI Symbol:Acc.MGI:3707583]                                                                          |
| ENSMUSG000000004976  | 2410015M20Rk | -0.56 | 0.00 | 0.00  | 0.31 | 0.03 | 0.34 | -0.06 | 0.70 | 1.00 | RIKEN cDNA 2410015M20 gene [Source:MGI Symbol:Acc.MGI:2442174]                                                                    |
| ENSMUSG0000000032652 | Creb2        | -0.73 | 0.00 | 0.00  | 0.32 | 0.10 | 0.84 | -0.02 | 0.95 | 1.00 | cAMP responsive element binding protein-like 2 [Source:MGI Symbol:Acc.MGI:1889385]                                                |
| ENSMUSG000000002030  | Cepb4        | -0.90 | 0.00 | 0.00  | 0.35 | 0.00 | 0.08 | -0.12 | 0.41 | 1.00 | cytoplasmic polyadenylation element binding protein 4 [Source:MGI Symbol:Acc.MGI:1914829]                                         |
| ENSMUSG000000004270  | Tp2p1        | -3.16 | 0.00 | 0.00  | 1.40 | 0.29 | 1.00 | -0.09 | 1.00 | 1.00 | BTB and CNC homology 2 [Source:MGI Symbol:Acc.MGI:684679]                                                                         |
| ENSMUSG000000003638  | Gm3538       | -1.54 | 0.00 | 0.00  | 0.49 | 0.00 | 0.68 | -0.06 | 0.17 | 1.00 | predicted pseudogene 3538 [Source:MGI Symbol:Acc.MGI:1923033]                                                                     |
| ENSMUSG0000000055639 | Dach1        | -1.27 | 0.00 | 0.00  | 0.48 | 0.25 | 1.00 | -0.02 | 1.00 | 1.00 | dachshund 1 (Drosophila) [Source:MGI Symbol:Acc.MGI:1277991]                                                                      |
| ENSMUSG000000031987  | Egln1        | -0.61 | 0.00 | 0.00  | 0.20 | 0.25 | 1.00 | -0.03 | 0.89 | 1.00 | EGLN1 gene homolog 1 (C. elegans) [Source:MGI Symbol:Acc.MGI:1932286]                                                             |
| ENSMUSG000000021910  | Nisch        | -0.32 | 0.00 | 0.00  | 0.16 | 0.03 | 0.39 | -0.01 | 0.94 | 1.00 | nischarin [Source:MGI Symbol:Acc.MGI:1928323]                                                                                     |
| ENSMUSG0000000081261 | Gm15370      | -1.03 | 0.00 | 0.00  | 0.40 | 0.19 | 1.00 | -0.26 | 0.31 | 1.00 | predicted gene 15370 [Source:MGI Symbol:Acc.MGI:3707467]                                                                          |
| ENSMUSG0000000084195 | Gm15372      | -1.03 | 0.00 | 0.00  | 0.39 | 0.19 | 1.00 | -0.26 | 0.31 | 1.00 | predicted gene 15372 [Source:MGI Symbol:Acc.MGI:3707469]                                                                          |
| ENSMUSG000000003636  | Cxom1p       | -0.41 | 0.00 | 0.00  | 0.24 | 0.00 | 0.07 | -0.13 | 1.26 | 1.00 | cytochrome c oxidase, subunit IVb polypeptide 1 [Source:MGI Symbol:Acc.MGI:107460]                                                |
| ENSMUSG000000003938  | Gm3108       | -1.60 | 0.00 | 0.00  | 0.32 | 0.07 | 0.65 | -0.28 | 0.05 | 1.00 | predicted pseudogene 3938 [Source:MGI Symbol:Acc.MGI:3642431]                                                                     |
| ENSMUSG0000000071454 | Dnb          | -1.00 | 0.00 | 0.00  | 0.46 | 0.11 | 0.87 | -0.02 | 1.00 | 1.00 | dystrobrevin, beta [Source:MGI Symbol:Acc.MGI:1203728]                                                                            |
| ENSMUSG000000044792  | Iscat1       | -0.47 | 0.00 | 0.00  | 0.24 | 0.05 | 0.48 | 0.03  | 0.84 | 1.00 | iron-sulfur cluster assembly 1 homolog (S. cerevisiae) [Source:MGI Symbol:Acc.MGI:1916296]                                        |
| ENSMUSG0000000067369 | Tmrb2b       | -0.89 | 0.00 | 0.00  | 0.55 | 0.03 | 0.32 | 0.06  | 0.83 | 1.00 | TRM2B tRNA methyltransferase 2 homolog B (S. cerevisiae) [Source:MGI Symbol:Acc.MGI:2442530]                                      |
| ENSMUSG000000021079  | Timm9        | -0.94 | 0.00 | 0.00  | 0.37 | 0.20 | 1.00 | 0.09  | 0.71 | 1.00 | translocase of inner mitochondrial membrane 9 [Source:MGI Symbol:Acc.MGI:1353436]                                                 |
| ENSMUSG000000017288  | Vps53        | -0.73 | 0.00 | 0.00  | 0.53 | 0.01 | 0.11 | 0.00  | 1.00 | 1.00 | vacuolar protein sorting 53 (yeast) [Source:MGI Symbol:Acc.MGI:1915549]                                                           |
| ENSMUSG0000000093535 | 490553122Rk  | -3.21 | 0.00 | 0.00  | 1.12 | 0.69 | 1.00 | -0.10 | 1.00 | 1.00 | RIKEN cDNA 490553122 gene [Source:MGI Symbol:Acc.MGI:3612498]                                                                     |
| ENSMUSG000000002328  | Cxcl12       | -3.18 | 0.00 | 0.00  | 0.69 | 0.69 | 1.00 | -0.22 | 0.74 | 1.00 | chemokine receptor 12 [Source:MGI Symbol:Acc.MGI:1915922]                                                                         |
| ENSMUSG0000000023022 | Lama1        | -0.60 | 0.00 | 0.00  | 0.26 | 0.10 | 0.84 | -0.14 | 0.38 | 1.00 | LIM domain and actin binding 1 [Source:MGI Symbol:Acc.MGI:1920992]                                                                |
| ENSMUSG0000000038515 | Grip1        | -0.70 | 0.00 | 0.00  | 0.37 | 0.05 | 0.54 | 0.08  | 0.66 | 1.00 | GH regulated TBC protein 1 [Source:MGI Symbol:Acc.MGI:1914040]                                                                    |
| ENSMUSG000000027108  | Ola1         | -0.91 | 0.00 | 0.00  | 0.50 | 0.06 | 0.56 | 0.14  | 0.56 | 1.00 | Olig1-like ATPase 1 [Source:MGI Symbol:Acc.MGI:1914309]                                                                           |
| ENSMUSG0000000033897 | Slc39a8      | -0.62 | 0.00 | 0.00  | 0.41 | 0.01 | 0.15 | -0.14 | 0.41 | 1.00 | solute carrier family 39 (metal ion transporter), member 8 [Source:MGI Symbol:Acc.MGI:1914797]                                    |
| ENSMUSG0000000033499 | Larp4b       | -0.61 | 0.00 | 0.00  | 0.17 | 0.30 | 1.00 | 0.32  | 0.04 | 1.00 | La ribonucleoprotein domain family, member 4B [Source:MGI Symbol:Acc.MGI:106330]                                                  |
| ENSMUSG0000000062827 | Gm13502      | -1.45 | 0.00 | 0.00  | 0.17 | 0.87 | 1.00 | 0.12  | 0.75 | 1.00 | predicted gene 13502 [Source:MGI Symbol:Acc.MGI:3645894]                                                                          |
| ENSMUSG000000001925  | Slc40a2      | -0.41 | 0.00 | 0.00  | 0.24 | 0.00 | 0.07 | -0.13 | 1.26 | 1.00 | cytochrome c oxidase, subunit IVb polypeptide 1 [Source:MGI Symbol:Acc.MGI:107460]                                                |
| ENSMUSG0000000041028 | Ghltm        | -1.25 | 0.00 | 0.00  | 0.10 | 0.06 | 0.61 | 0.01  | 0.86 | 1.00 | growth hormone inducible transmembrane protein [Source:MGI Symbol:Acc.MGI:1913342]                                                |
| ENSMUSG000000024059  | Ctip4        | -1.56 | 0.00 | 0.00  | 1.0  |      |      |       |      |      |                                                                                                                                   |

|                      |              |       |      |      |       |      |      |       |      |      |                                                                                                                                       |
|----------------------|--------------|-------|------|------|-------|------|------|-------|------|------|---------------------------------------------------------------------------------------------------------------------------------------|
| ENSMUSG00000088456   | 75K          | -2.67 | 0.00 | 0.00 | 1.33  | 0.15 | 1.00 | -0.11 | 0.87 | 1.00 | 75K RNA [Source:RFAM:Acc:RF00100]                                                                                                     |
| ENSMUSG00000028672   | Hmgcl        | -0.45 | 0.00 | 0.00 | 0.23  | 0.04 | 0.48 | -0.09 | 0.48 | 1.00 | 3-hydroxy-3-methylglutaryl-Coenzyme A lyase [Source:MGI Symbol:Acc:MGI:96158]                                                         |
| ENSMUSG00000037818   | 3110057012Rk | -1.08 | 0.00 | 0.00 | 0.59  | 0.07 | 0.66 | 0.10  | 0.73 | 1.00 | RIKEN cDNA 3110057012 gene [Source:MGI Symbol:Acc:MGI:1918624]                                                                        |
| ENSMUSG00000039878   | Sc3pa5       | -0.06 | 0.00 | 0.00 | 0.53  | 0.06 | 0.60 | 0.11  | 0.69 | 1.00 | solute carrier family 39 (metal ion transporter), member 5 [Source:MGI Symbol:Acc:MGI:1919336]                                        |
| ENSMUSG00000068115   | Nirl         | -0.78 | 0.00 | 0.00 | 0.20  | 0.39 | 1.00 | -0.11 | 0.63 | 1.00 | nirin-like [Source:MGI Symbol:Acc:MGI:1925427]                                                                                        |
| ENSMUSG00000021748   | Pdihb        | -0.40 | 0.00 | 0.00 | 0.21  | 0.05 | 0.51 | 0.08  | 0.48 | 1.00 | pyruvate dehydrogenase (liponamide) beta [Source:MGI Symbol:Acc:MGI:1915513]                                                          |
| ENSMUSG00000028036   | Pqgr         | -1.34 | 0.00 | 0.00 | 0.61  | 0.13 | 0.99 | 0.00  | 1.00 | 1.00 | prostaglandin F receptor [Source:MGI Symbol:Acc:MGI:97796]                                                                            |
| ENSMUSG00000061718   | Pp1r1b       | -0.63 | 0.00 | 0.00 | 0.21  | 0.25 | 1.00 | -0.25 | 0.23 | 1.00 | protein phosphatase 1, regulatory (inhibitor) subunit 1B [Source:MGI Symbol:Acc:MGI:94860]                                            |
| ENSMUSG00000013622   | Atraid       | -0.50 | 0.00 | 0.00 | 0.31  | 0.02 | 0.26 | -0.04 | 0.79 | 1.00 | all-trans retinoic acid induced differentiation factor [Source:MGI Symbol:Acc:MGI:1918918]                                            |
| ENSMUSG00000073067   | 9130019P16Rk | -2.00 | 0.00 | 0.00 | 0.61  | 0.48 | 1.00 | 0.06  | 1.00 | 1.00 | RIKEN cDNA 9130019P16 gene [Source:MGI Symbol:Acc:MGI:1918824]                                                                        |
| ENSMUSG00000003978   | Sc3pa5       | -0.06 | 0.00 | 0.00 | 0.53  | 0.06 | 0.60 | 0.11  | 0.69 | 1.00 | supporter of lin-12-like (C. elegans) [Source:MGI Symbol:Acc:MGI:1329016]                                                             |
| ENSMUSG00000042032   | Mat2b        | -0.51 | 0.00 | 0.00 | 0.22  | 0.11 | 0.89 | 0.01  | 0.97 | 1.00 | methionine adenosyltransferase II, beta [Source:MGI Symbol:Acc:MGI:1913667]                                                           |
| ENSMUSG00000003465   | Cncd3        | -0.56 | 0.00 | 0.00 | 0.25  | 0.12 | 0.89 | -0.04 | 0.82 | 1.00 | cyclin D3 [Source:MGI Symbol:Acc:MGI:88315]                                                                                           |
| ENSMUSG00000008097   | Gm13772      | -0.53 | 0.00 | 0.00 | 0.26  | 0.08 | 0.71 | 0.36  | 0.01 | 1.00 | predicted gene 13772 [Source:MGI Symbol:Acc:MGI:3650155]                                                                              |
| ENSMUSG00000003216   | Stard8       | -0.58 | 0.00 | 0.00 | 0.27  | 0.10 | 0.82 | -0.13 | 0.42 | 1.00 | START domain containing 8 [Source:MGI Symbol:Acc:MGI:2448556]                                                                         |
| ENSMUSG00000041765   | Ubac3        | -0.81 | 0.00 | 0.00 | 0.57  | 0.02 | 0.22 | 0.04  | 0.89 | 1.00 | ubiquitin associated domain containing 2 [Source:MGI Symbol:Acc:MGI:1916139]                                                          |
| ENSMUSG00000036172   | Cd200r3      | -0.86 | 0.00 | 0.00 | 0.30  | 0.29 | 1.00 | -0.02 | 0.94 | 1.00 | CD200 receptor 3 [Source:MGI Symbol:Acc:MGI:1921853]                                                                                  |
| ENSMUSG00000003978   | Sc3pa5       | -0.06 | 0.00 | 0.00 | 0.53  | 0.06 | 0.60 | 0.11  | 0.69 | 1.00 | Werner syndrome homolog (human) [Source:MGI Symbol:Acc:MGI:109635]                                                                    |
| ENSMUSG00000057522   | Scgp         | -0.51 | 0.00 | 0.00 | 0.27  | 0.05 | 0.55 | 0.10  | 0.53 | 1.00 | speckle-type POZ protein [Source:MGI Symbol:Acc:MGI:1343085]                                                                          |
| ENSMUSG00000001598   | Caena1d      | -0.60 | 0.00 | 0.00 | 0.46  | 0.00 | 0.07 | 0.06  | 0.77 | 1.00 | calcium channel, voltage-dependent, L type, alpha 1D subunit [Source:MGI Symbol:Acc:MGI:88293]                                        |
| ENSMUSG000000081600  | Gm12286      | -0.31 | 0.00 | 0.00 | 0.16  | 0.04 | 0.42 | -0.01 | 0.94 | 1.00 | predicted gene 12286 [Source:MGI Symbol:Acc:MGI:3649467]                                                                              |
| ENSMUSG000000004319  | Cln3c        | -0.40 | 0.00 | 0.00 | 0.26  | 0.01 | 0.19 | 0.23  | 0.05 | 1.00 | chloride channel 3 [Source:MGI Symbol:Acc:MGI:103555]                                                                                 |
| ENSMUSG00000004098   | Npnt         | -0.45 | 0.00 | 0.00 | -0.15 | 0.23 | 1.00 | -0.40 | 0.01 | 1.00 | nephronectin [Source:MGI Symbol:Acc:MGI:2148811]                                                                                      |
| ENSMUSG000000024610  | Cd74         | -0.54 | 0.00 | 0.00 | -0.16 | 0.32 | 1.00 | -0.03 | 0.91 | 1.00 | CD74 antigen (invariant polyptide of major histocompatibility complex, class II antigen-associated) [Source:MGI Symbol:Acc:MGI:96534] |
| ENSMUSG00000002920   | Inr1         | -0.72 | 0.00 | 0.00 | 0.22  | 0.59 | 1.00 | 0.02  | 0.95 | 1.00 | Inouos related homeobox 1 (Drosophila) [Source:MGI Symbol:Acc:MGI:1197515]                                                            |
| ENSMUSG00000045294   | Inr1         | -0.68 | 0.00 | 0.00 | -0.08 | 0.14 | 1.00 | 0.11  | 0.72 | 1.00 | family with sequence similarity 13 [Source:MGI Symbol:Acc:MGI:1916289]                                                                |
| ENSMUSG000000026199  | Ank121       | -0.54 | 0.00 | 0.00 | 0.21  | 0.18 | 1.00 | -0.13 | 0.43 | 1.00 | ankyrin repeat and zinc finger domain containing 1 [Source:MGI Symbol:Acc:MGI:1088746]                                                |
| ENSMUSG00000098192   | -            | -0.31 | 0.00 | 0.00 | 0.15  | 0.05 | 0.55 | 0.01  | 0.91 | 1.00 | 0                                                                                                                                     |
| ENSMUSG000000057147  | Atpb4        | -1.27 | 0.00 | 0.00 | 0.79  | 0.04 | 0.46 | 0.01  | 1.00 | 1.00 | ATP binding domain 4 [Source:MGI Symbol:Acc:MGI:1913882]                                                                              |
| ENSMUSG000000028343  | Erp44        | -0.60 | 0.00 | 0.00 | 0.37  | 0.03 | 0.34 | -0.21 | 0.23 | 1.00 | endoplasmic reticulum protein 44 [Source:MGI Symbol:Acc:MGI:1923549]                                                                  |
| ENSMUSG00000043988   | Mgat2        | -0.49 | 0.00 | 0.00 | 0.18  | 0.20 | 1.00 | -0.06 | 0.69 | 1.00 | mannoside acetylglucosaminyltransferase 2 [Source:MGI Symbol:Acc:MGI:2384966]                                                         |
| ENSMUSG000000029190  | Pt411        | -0.72 | 0.00 | 0.00 | 0.22  | 0.04 | 0.45 | -0.06 | 0.05 | 1.00 | predicted gene 29190 [Source:MGI Symbol:Acc:MGI:3651240]                                                                              |
| ENSMUSG0000000287478 | 493050C21Rik | -0.43 | 0.00 | 0.00 | 0.24  | 0.04 | 0.45 | -0.06 | 0.64 | 1.00 | RIKEN cDNA 493050C21 gene [Source:MGI Symbol:Acc:MGI:1922310]                                                                         |
| ENSMUSG000000040188  | Scamp2       | -0.46 | 0.00 | 0.00 | 0.26  | 0.04 | 0.42 | -0.07 | 0.64 | 1.00 | secretory carrier membrane protein 2 [Source:MGI Symbol:Acc:MGI:1346518]                                                              |
| ENSMUSG00000077497   | SNORA26      | -1.64 | 0.00 | 0.00 | 0.88  | 0.11 | 0.87 | -0.14 | 0.79 | 1.00 | Small nuclear RNA SNORA26 [Source:RFAM:Acc:RF00568]                                                                                   |
| ENSMUSG00000002656   | Fcgr2b       | -0.67 | 0.00 | 0.00 | 0.36  | 0.07 | 0.63 | -0.21 | 0.29 | 1.00 | Fc receptor, IgG, low affinity IIB [Source:MGI Symbol:Acc:MGI:95499]                                                                  |
| ENSMUSG000000061887  | Ssbp3        | -0.77 | 0.00 | 0.00 | 0.50  | 0.03 | 0.34 | -0.11 | 0.62 | 1.00 | single-stranded DNA binding protein 3 [Source:MGI Symbol:Acc:MGI:1919725]                                                             |
| ENSMUSG000000041594  | Tmtc4        | -1.06 | 0.00 | 0.00 | 0.51  | 0.13 | 0.98 | 0.08  | 0.86 | 1.00 | transmembrane and tetrahydrocannabinol repeat containing 4 [Source:MGI Symbol:Acc:MGI:1921050]                                        |
| ENSMUSG000000029190  | Inr1         | -0.72 | 0.00 | 0.00 | 0.22  | 0.59 | 1.00 | 0.02  | 0.95 | 1.00 | Inouos related homeobox 1 (Drosophila) [Source:MGI Symbol:Acc:MGI:1197515]                                                            |
| ENSMUSG00000038422   | Hdh3c        | -0.98 | 0.00 | 0.00 | 0.46  | 0.16 | 1.00 | 0.04  | 0.93 | 1.00 | haloacid dehalogenase-like hydrolase domain containing 3 [Source:MGI Symbol:Acc:MGI:1919998]                                          |
| ENSMUSG000000042444  | Fam33b       | -0.48 | 0.00 | 0.00 | 0.30  | 0.35 | 1.00 | -0.15 | 0.61 | 1.00 | solute carrier family 2 (facilitated glucose transporter), member 4 [Source:MGI Symbol:Acc:MGI:95758]                                 |
| ENSMUSG000000090256  | Alms1-ps1    | -1.54 | 0.00 | 0.00 | 0.98  | 0.04 | 0.47 | 0.33  | 0.37 | 1.00 | Alstrom syndrome 1, pseudogene 1 [Source:MGI Symbol:Acc:MGI:3646394]                                                                  |
| ENSMUSG000000015536  | Mocs2        | -0.52 | 0.00 | 0.00 | 0.16  | 0.30 | 1.00 | 0.10  | 0.51 | 1.00 | molybdenum cofactor synthesis 2 [Source:MGI Symbol:Acc:MGI:1336894]                                                                   |
| ENSMUSG000000028532  | Cachd1       | -1.01 | 0.00 | 0.00 | 0.69  | 0.02 | 0.24 | -0.06 | 0.93 | 1.00 | cache domain containing 1 [Source:MGI Symbol:Acc:MGI:2444177]                                                                         |
| ENSMUSG000000055670  | Zzf1         | -0.62 | 0.00 | 0.00 | 0.42  | 0.02 | 0.22 | 0.00  | 1.00 | 1.00 | zinc finger, ZZ-type with EF hand domain 1 [Source:MGI Symbol:Acc:MGI:2444286]                                                        |
| ENSMUSG000000029190  | Inr1         | -0.72 | 0.00 | 0.00 | 0.22  | 0.59 | 1.00 | 0.02  | 0.95 | 1.00 | Inouos related homeobox 1 (Drosophila) [Source:MGI Symbol:Acc:MGI:1197515]                                                            |
| ENSMUSG00000038489   | Fat10b       | -0.44 | 0.00 | 0.00 | 0.28  | 0.14 | 1.00 | -0.11 | 0.42 | 1.00 | family with sequence similarity 68, member C [Source:MGI Symbol:Acc:MGI:1917428]                                                      |
| ENSMUSG000000042444  | Fam33b       | -0.48 | 0.00 | 0.00 | 0.23  | 0.15 | 1.00 | 0.04  | 0.80 | 1.00 | family with sequence similarity 63, member B [Source:MGI Symbol:Acc:MGI:2443086]                                                      |
| ENSMUSG000000035933  | Cog5         | -1.20 | 0.00 | 0.00 | 0.52  | 0.21 | 1.00 | 0.01  | 1.00 | 1.00 | component of oligomeric golgi complex 5 [Source:MGI Symbol:Acc:MGI:2145130]                                                           |
| ENSMUSG000000031835  | Mbps1        | -0.53 | 0.00 | 0.00 | 0.24  | 0.12 | 0.90 | 0.01  | 0.96 | 1.00 | membrane-bound transcription factor peptidase, site 1 [Source:MGI Symbol:Acc:MGI:1927235]                                             |
| ENSMUSG00000010721   | Lmbr1        | -1.46 | 0.00 | 0.00 | 0.64  | 0.21 | 1.00 | -0.15 | 0.73 | 1.00 | limb region 1 [Source:MGI Symbol:Acc:MGI:1861746]                                                                                     |
| ENSMUSG00000041685   | Fcho2        | -0.44 | 0.00 | 0.00 | 0.29  | 0.02 | 0.24 | 0.13  | 0.31 | 1.00 | FCH domain only 2 [Source:MGI Symbol:Acc:MGI:3505790]                                                                                 |
| ENSMUSG000000062777  | Gm15376      | -0.95 | 0.00 | 0.00 | 0.36  | 0.24 | 1.00 | -0.26 | 0.31 | 1.00 | predicted gene 15376 [Source:MGI Symbol:Acc:MGI:3707460]                                                                              |
| ENSMUSG00000004989   | Gpr153       | -0.85 | 0.00 | 0.00 | 0.38  | 0.28 | 1.00 | -0.07 | 0.62 | 1.00 | predicted gene 15369 [Source:MGI Symbol:Acc:MGI:3707462]                                                                              |
| ENSMUSG000000027033  | Ptprr1       | -0.96 | 0.00 | 0.00 | 0.36  | 0.03 | 0.32 | -0.03 | 0.89 | 1.00 | protein tyrosine phosphatase, receptor type, A [Source:MGI Symbol:Acc:MGI:97808]                                                      |
| ENSMUSG00000020003   | Pex7         | -0.62 | 0.00 | 0.00 | 0.38  | 0.04 | 0.41 | 0.00  | 1.00 | 1.00 | peroxisomal biogenesis factor 7 [Source:MGI Symbol:Acc:MGI:1321392]                                                                   |
| ENSMUSG000000038481  | Cdk19        | -0.97 | 0.00 | 0.00 | 0.64  | 0.03 | 0.37 | -0.07 | 0.86 | 1.00 | cyclin-dependent kinase 19 [Source:MGI Symbol:Acc:MGI:1925548]                                                                        |
| ENSMUSG00000016028   | Celsr1       | -0.89 | 0.00 | 0.00 | 0.75  | 0.00 | 0.07 | 0.18  | 0.49 | 1.00 | cadherin, EGF LAG seven-pass G-type receptor 1 (flamingo homolog, Drosophila) [Source:MGI Symbol:Acc:MGI:1100883]                     |
| ENSMUSG000000032023  | Pigb         | -0.80 | 0.00 | 0.00 | 0.31  | 0.08 | 0.72 | -0.02 | 0.96 | 1.00 | phosphatidylinositol glycan anchor biosynthesis, class B [Source:MGI Symbol:Acc:MGI:1891825]                                          |
| ENSMUSG00000022647   | Ccna1        | -0.79 | 0.00 | 0.00 | 0.62  | 0.01 | 0.04 | 0.17  | 0.57 | 1.00 | microtubule receptor coactivator 1 [Source:MGI Symbol:Acc:MGI:1276523]                                                                |
| ENSMUSG000000038481  | Cdk19        | -0.97 | 0.00 | 0.00 | 0.64  | 0.03 | 0.37 | -0.07 | 0.86 | 1.00 | cyclin-dependent kinase 19 [Source:MGI Symbol:Acc:MGI:1925548]                                                                        |
| ENSMUSG000000038717  | Atp5f1       | -0.35 | 0.00 | 0.00 | 0.25  | 0.00 | 0.05 | 0.14  | 0.18 | 1.00 | ATP synthase, H+ transporting, mitochondrial F0 complex, subunit g [Source:MGI Symbol:Acc:MGI:1351597]                                |
| ENSMUSG000000095311  | U6           | -2.34 | 0.00 | 0.00 | 0.73  | 0.55 | 1.00 | -0.08 | 1.00 | 1.00 | U6 spliceosomal RNA [Source:RFAM:Acc:RF00026]                                                                                         |
| ENSMUSG000000061825  | Ces2c        | -0.39 | 0.00 | 0.00 | 0.05  | 0.65 | 1.00 | 0.10  | 0.38 | 1.00 | carboxylesterase 2C [Source:MGI Symbol:Acc:MGI:2385905]                                                                               |
| ENSMUSG000000022742  | Cpxc         | -0.45 | 0.00 | 0.00 | 0.09  | 0.51 | 1.00 | 0.02  | 0.92 | 1.00 | coproporphyrinogen oxidase [Source:MGI Symbol:Acc:MGI:104841]                                                                         |
| ENSMUSG000000093624  | Gm20704      | -1.85 | 0.00 | 0.01 | 1.01  | 0.15 | 1.00 | 0.10  | 0.89 | 1.00 | predicted gene 20704 [Source:MGI Symbol:Acc:MGI:5313151]                                                                              |
| ENSMUSG000000093687  | Gm20637      | -1.84 | 0.00 | 0.00 | 1.00  | 0.15 | 1.00 | 0.09  | 1.00 | 1.00 | predicted gene 20637 [Source:MGI Symbol:Acc:MGI:5313084]                                                                              |
| ENSMUSG000000039878  | Sc3pa5       | -0.06 | 0.00 | 0.00 | 0.53  | 0.06 | 0.60 | 0.11  | 0.69 | 1.00 | Werner syndrome homolog (human) [Source:MGI Symbol:Acc:MGI:109635]                                                                    |
| ENSMUSG000000057265  | Ccdc176      | -0.59 | 0.00 | 0.00 | 0.31  | 0.02 | 0.31 | 0.01  | 0.96 | 1.00 | colicoid-coil domain containing 176 [Source:MGI Symbol:Acc:MGI:1920123]                                                               |
| ENSMUSG00000043531   | Sorsc1       | -3.61 | 0.00 | 0.01 | 0.59  | 1.00 | 0.00 | 0.81  | 0.10 | 1.00 | VPS10 domain receptor protein SORCS 1 [Source:MGI Symbol:Acc:MGI:1929666]                                                             |
| ENSMUSG000000051984  | Sec31b       | -2.37 | 0.00 | 0.01 | 0.44  | 0.75 | 1.00 | -0.18 | 0.74 | 1.00 | Sec31 homolog B (S. cerevisiae) [Source:MGI Symbol:Acc:MGI:2685187]                                                                   |
| ENSMUSG00000029554   | Mad11        | -2.21 | 0.00 | 0.01 | -0.04 | 1.00 | 1.00 | -0.03 | 1.00 | 1.00 | MAD1 mitotic arrest deficient 1-like 1 [Source:MGI Symbol:Acc:MGI:1341857]                                                            |
| ENSMUSG000000077993  | AC113244.1   | -0.08 | 0.00 | 0.01 | 0.88  | 0.24 | 1.00 | 0.11  | 0.89 | 1.00 | 0                                                                                                                                     |
| ENSMUSG00000002674   | Hnh2         | -1.15 | 0.00 | 0.01 | 0.27  | 0.60 | 1.00 | -0.05 | 0.92 | 1.00 | proteasidom homolog (Drosophila) [Source:MGI Symbol:Acc:MGI:1916925]                                                                  |
| ENSMUSG000000029190  | Inr1         | -0.72 | 0.00 | 0.00 | 0.22  | 0.59 | 1.00 | 0.02  | 0.95 | 1.00 | Inouos related homeobox 1 (Drosophila) [Source:MGI Symbol:Acc:MGI:1197515]                                                            |
| ENSMUSG000000041779  | Tram2        | -1.43 | 0.00 | 0.01 | 0.55  | 0.26 | 1.00 | 0.14  | 0.73 | 1.00 | translocating chain-associated membrane protein 2 [Source:MGI Symbol:Acc:MGI:1924817]                                                 |
| ENSMUSG000000096810  | RP23-30B3.1  | -0.32 | 0.00 | 0.01 | 0.18  | 0.03 | 0.35 | -0.01 | 0.91 | 1.00 | 0                                                                                                                                     |
| ENSMUSG000000091803  | Cox16        | -0.82 | 0.00 | 0.01 | 0.43  | 0.09 | 0.78 | 0.02  | 1.00 | 1.00 | COX16 cytochrome c oxidase assembly homolog (S. cerevisiae) [Source:MGI Symbol:Acc:MGI:1913522]                                       |
| ENSMUSG000000087904  | 75K          | -1.34 | 0.00 | 0.01 | 0.75  | 0.11 | 0.87 | 0.66  | 0.03 | 1.00 | 75K RNA [Source:RFAM:Acc:RF00100]                                                                                                     |
| ENSMUSG000000004341  | Gp96         | -0.84 | 0.00 | 0.01 | 0.17  | 0.53 | 1.00 | -0.21 | 0.39 | 1.00 | glutathione peroxidase 6 [Source:MGI Symbol:Acc:MGI:1922762]                                                                          |
| ENSMUSG000000055426  | Gm98977      | -1.06 | 0.00 | 0.01 | 0.91  | 0.00 | 0.06 | -0.25 | 0.33 | 1.00 | predicted gene 9877 [Source:MGI Symbol:Acc:MGI:3705538]                                                                               |
| ENSMUSG000000003959  | Acd1-T1      | -1.50 | 0.00 | 0.01 | -0.21 | 0.02 | 0.22 | -0.13 | 0.81 | 1.00 | mitochondrial enzyme [Source:MGI Symbol:Acc:MGI:102470]                                                                               |
| ENSMUSG000000031990  | Jam3         | -0.99 | 0.00 | 0.01 | 0.37  | 0.28 | 1.00 | -0.30 | 0.31 | 1.00 | junction adhesion molecule 3 [Source:MGI Symbol:Acc:MGI:1933825]                                                                      |
| ENSMUSG00000046808   | Atp10d       | -0.78 | 0.00 | 0.01 | 0.56  | 0.02 | 0.23 | 0.20  | 0.31 | 1.00 | ATPase, class V, type 10D [Source:MGI Symbol:Acc:MGI:2450125]                                                                         |
| ENSMUSG000000026986  | Hmmt         | -1.09 | 0.00 | 0.01 | 0.55  | 0.11 | 0.84 |       |      |      |                                                                                                                                       |

|                     |              |       |      |      |       |      |      |       |      |        |                                                                                                                                    |
|---------------------|--------------|-------|------|------|-------|------|------|-------|------|--------|------------------------------------------------------------------------------------------------------------------------------------|
| ENSMUSG000000041974 | 2310008H04Rk | -2.16 | 0.00 | 0.01 | 0.32  | 1.00 | 1.00 | -0.08 | 1.00 | 1.00   | RIKEN cDNA 2310008H04 gene [Source:MGI Symbol:Acc:MGI:1924834]                                                                     |
| ENSMUSG000000029154 | Cwh43        | -2.09 | 0.00 | 0.01 | 0.70  | 0.58 | 1.00 | 0.07  | 1.00 | 1.00   | cell wall biogenesis 43 C-terminal homolog (S. cerevisiae) [Source:MGI Symbol:Acc:MGI:2444131]                                     |
| ENSMUSG000000038070 | Cnln         | -2.06 | 0.00 | 0.01 | 0.34  | 1.00 | 1.00 | 0.09  | 0.88 | 1.00   | centriole, centrosomal protein [Source:MGI Symbol:Acc:MGI:2443104]                                                                 |
| ENSMUSG000000025728 | Scp2a1       | -1.23 | 0.00 | 0.01 | 0.59  | 0.22 | 1.00 | -0.21 | 0.58 | 1.00   | solute carrier family 28 (sodium-coupled nucleoside transporter), member 1 [Source:MGI Symbol:Acc:MGI:3605073]                     |
| ENSMUSG000000035048 | Anapc13      | -0.65 | 0.00 | 0.01 | 0.40  | 0.05 | 0.51 | 0.08  | 0.71 | 1.00   | anaphase promoting complex subunit 13 [Source:MGI Symbol:Acc:MGI:1916260]                                                          |
| ENSMUSG000000005951 | Shk1         | -0.97 | 0.00 | 0.01 | 0.52  | 1.00 | 0.80 | -0.04 | 0.93 | 1.00   | glycerol-3-phosphate 3-kinase [Source:MGI Symbol:Acc:MGI:1921867]                                                                  |
| ENSMUSG000000028496 | Mll3         | -1.68 | 0.00 | 0.01 | 0.34  | 0.68 | 1.00 | -0.13 | 0.79 | 1.00   | myeloid/lymphoid or mixed-lineage leukemia (trithorax homolog, Drosophila); translocated to, 3 [Source:MGI Symbol:Acc:MGI:1917372] |
| ENSMUSG000000020847 | Rph3al       | -1.67 | 0.00 | 0.01 | 0.81  | 0.14 | 1.00 | -0.07 | 1.00 | 1.00   | ribophyllin 3A-like (without C2 domains) [Source:MGI Symbol:Acc:MGI:1923492]                                                       |
| ENSMUSG000000057766 | Ankrd29      | -1.55 | 0.00 | 0.01 | 0.62  | 0.34 | 1.00 | 0.07  | 1.00 | 1.00   | ankyrin repeat domain 29 [Source:MGI Symbol:Acc:MGI:2687055]                                                                       |
| ENSMUSG000000031485 | Prosc        | -0.85 | 0.00 | 0.01 | 0.27  | 0.00 | 0.07 | -0.14 | 0.25 | 1.00   | proline synthetase co-transcribed [Source:MGI Symbol:Acc:MGI:1891207]                                                              |
| ENSMUSG000000029728 | Sclp2        | -0.84 | 0.00 | 0.01 | 0.27  | 0.04 | 1.00 | 0.21  | 0.87 | 1.00   | solid X receptor, alpha [Source:MGI Symbol:Acc:MGI:1928147]                                                                        |
| ENSMUSG000000034424 | Gsch         | -0.45 | 0.00 | 0.01 | 0.21  | 0.11 | 0.86 | 0.01  | 0.94 | 1.00   | glycine cleavage system protein H (aminomethyl carrier) [Source:MGI Symbol:Acc:MGI:1915383]                                        |
| ENSMUSG000000024150 | Mcf2         | -0.40 | 0.00 | 0.01 | -0.07 | 0.56 | 1.00 | 0.08  | 0.53 | 1.00   | multiple coagulation factor deficiency 2 [Source:MGI Symbol:Acc:MGI:2183439]                                                       |
| ENSMUSG000000020416 | Ndufb2       | -0.53 | 0.00 | 0.01 | 0.31  | 0.05 | 0.54 | -0.04 | 0.82 | 1.00   | NADH dehydrogenase (ubiquinone) 1 beta subcomplex, 2 [Source:MGI Symbol:Acc:MGI:1915448]                                           |
| ENSMUSG000000058022 | Adtrp        | -0.56 | 0.00 | 0.01 | 0.29  | 1.00 | 0.84 | -0.03 | 0.92 | 1.00   | androgen dependent TFPI regulating protein [Source:MGI Symbol:Acc:MGI:1924596]                                                     |
| ENSMUSG000000050022 | Anz1         | -0.99 | 0.00 | 0.01 | 0.47  | 0.16 | 1.00 | -0.08 | 0.86 | 1.00   | archaelysin family metalloprotease 1 [Source:MGI Symbol:Acc:MGI:2442258]                                                           |
| ENSMUSG000000030513 | Pcsk6        | -0.76 | 0.00 | 0.01 | 0.28  | 0.25 | 1.00 | -0.17 | 0.47 | 1.00   | proprotein convertase subtilisin/kexin type 6 [Source:MGI Symbol:Acc:MGI:102897]                                                   |
| ENSMUSG000000025728 | Scp2a1       | -0.38 | 0.00 | 0.01 | 0.18  | 0.12 | 0.89 | 0.11  | 0.38 | 1.00   | RIKEN cDNA 4933493F05 gene [Source:MGI Symbol:Acc:MGI:1914000]                                                                     |
| ENSMUSG000000020546 | Sbbp4        | -0.83 | 0.00 | 0.01 | 0.50  | 0.05 | 0.55 | 0.16  | 0.50 | 1.00   | synactin binding protein 4 [Source:MGI Symbol:Acc:MGI:1342296]                                                                     |
| ENSMUSG000000026594 | Ralgs2       | -0.87 | 0.00 | 0.01 | 0.45  | 0.11 | 0.87 | 0.17  | 0.53 | 1.00   | Ral GEF with PH domain and SH3 binding motif 2 [Source:MGI Symbol:Acc:MGI:1922505]                                                 |
| ENSMUSG000000062949 | Atp11c       | -0.87 | 0.00 | 0.01 | 0.57  | 0.04 | 0.47 | 0.06  | 0.87 | 1.00   | ATPase, class VI, type 11C [Source:MGI Symbol:Acc:MGI:1859661]                                                                     |
| ENSMUSG000000067144 | Sck22a7      | -0.74 | 0.00 | 0.01 | -0.02 | 0.95 | 1.00 | 1.01  | 0.00 | 0.09   | solute carrier family 22 (organic anion transporter), member 7 [Source:MGI Symbol:Acc:MGI:1859569]                                 |
| ENSMUSG000000027428 | Rbbp9        | -0.63 | 0.00 | 0.01 | 0.34  | 0.10 | 0.80 | 0.02  | 0.95 | 1.00   | retinoblastoma binding protein 9 [Source:MGI Symbol:Acc:MGI:1347074]                                                               |
| ENSMUSG000000027603 | Gat7         | -1.39 | 0.00 | 0.01 | 0.67  | 0.21 | 1.00 | 0.02  | 1.00 | 1.00   | gamma-glutamyltransferase 7 [Source:MGI Symbol:Acc:MGI:1913385]                                                                    |
| ENSMUSG000000029154 | Cwh43        | -0.60 | 0.00 | 0.01 | 0.36  | 0.04 | 1.00 | 0.01  | 0.60 | 0.7892 | predicted gene 7892 [Source:MGI Symbol:Acc:MGI:3646299]                                                                            |
| ENSMUSG000000031978 | Tbc1d19      | -0.72 | 0.00 | 0.01 | 0.44  | 0.05 | 0.55 | -0.08 | 0.73 | 1.00   | TBC1 domain family, member 19 [Source:MGI Symbol:Acc:MGI:1914499]                                                                  |
| ENSMUSG000000024245 | Tmem178      | -0.70 | 0.00 | 0.01 | 0.21  | 0.30 | 1.00 | 0.12  | 0.55 | 1.00   | transmembrane protein 178 [Source:MGI Symbol:Acc:MGI:1915277]                                                                      |
| ENSMUSG000000035024 | Ncapd3       | -0.96 | 0.00 | 0.01 | 0.50  | 0.12 | 0.92 | -0.10 | 0.79 | 1.00   | non-SMC condensin II complex, subunit D3 [Source:MGI Symbol:Acc:MGI:2142989]                                                       |
| ENSMUSG000000032867 | Fbw8         | -0.48 | 0.00 | 0.01 | 0.26  | 0.07 | 0.66 | 0.04  | 0.83 | 1.00   | F-box and WD-40 domain protein 8 [Source:MGI Symbol:Acc:MGI:1923041]                                                               |
| ENSMUSG000000025579 | Gaa          | -0.54 | 0.00 | 0.01 | 0.26  | 0.13 | 0.95 | -0.25 | 0.15 | 1.00   | glucosidase, alpha, alpha [Source:MGI Symbol:Acc:MGI:95609]                                                                        |
| ENSMUSG000000075415 | Frbp1        | -0.64 | 0.00 | 0.01 | 0.32  | 0.12 | 0.91 | -0.02 | 1.00 | 1.00   | formin binding protein 1 [Source:MGI Symbol:Acc:MGI:109606]                                                                        |
| ENSMUSG000000023230 | Wdr2         | -0.60 | 0.00 | 0.01 | 0.29  | 0.20 | 1.00 | 0.35  | 0.95 | 1.00   | pyruvate dehydrogenase kinase, isoenzyme 3 [Source:MGI Symbol:Acc:MGI:2384308]                                                     |
| ENSMUSG000000036230 | Gidc1        | -1.16 | 0.00 | 0.01 | 0.27  | 0.50 | 1.00 | -0.10 | 0.44 | 1.00   | gamma-glutamyltransferase-like domain containing 1 [Source:MGI Symbol:Acc:MGI:2444269]                                             |
| ENSMUSG000000025726 | D3Erd751e    | -1.13 | 0.00 | 0.01 | 0.57  | 0.16 | 1.00 | -0.02 | 1.00 | 1.00   | DNA segment, Chr 3, ERATO D01 751, expressed [Source:MGI Symbol:Acc:MGI:1289213]                                                   |
| ENSMUSG000000031618 | Nr3c2        | -1.27 | 0.00 | 0.01 | 0.42  | 0.38 | 1.00 | 0.01  | 1.00 | 1.00   | nuclear receptor subfamily 3, group C, member 2 [Source:MGI Symbol:Acc:MGI:99459]                                                  |
| ENSMUSG000000029438 | Bcl7a        | -0.43 | 0.00 | 0.01 | 0.28  | 0.02 | 0.31 | -0.13 | 0.36 | 1.00   | B cell CLL/lymphoma 7A [Source:MGI Symbol:Acc:MGI:1924295]                                                                         |
| ENSMUSG000000042797 | Aqp11        | -0.76 | 0.00 | 0.01 | 0.43  | 0.08 | 0.73 | 0.02  | 1.00 | 1.00   | aquaporin 11 [Source:MGI Symbol:Acc:MGI:1913583]                                                                                   |
| ENSMUSG000000029829 | Tmem213      | -0.67 | 0.00 | 0.01 | 0.21  | 0.37 | 1.00 | 0.06  | 0.79 | 1.00   | transmembrane protein 213 [Source:MGI Symbol:Acc:MGI:1924772]                                                                      |
| ENSMUSG000000029154 | Cwh43        | -0.66 | 0.00 | 0.01 | 0.36  | 0.04 | 1.00 | 0.01  | 0.60 | 0.7892 | predicted gene 7892 [Source:MGI Symbol:Acc:MGI:3646299]                                                                            |
| ENSMUSG000000026594 | Ralgs2       | -0.36 | 0.00 | 0.01 | -0.44 | 0.00 | 0.01 | -0.71 | 0.00 | 0.00   | apoptosis regulator E [Source:MGI Symbol:Acc:MGI:88957]                                                                            |
| ENSMUSG000000096764 | SLC12A6      | -0.73 | 0.00 | 0.01 | 0.31  | 0.20 | 1.00 | 0.41  | 0.03 | 1.00   | Slc12a6 protein, Uncharacterized protein [Source:UniProtKB/TrEMBL:Acc:Q6PEP5]                                                      |
| ENSMUSG000000021495 | Fam193b      | -0.47 | 0.00 | 0.01 | 0.17  | 0.24 | 1.00 | -0.14 | 0.36 | 1.00   | family with sequence similarity 193, member B [Source:MGI Symbol:Acc:MGI:2385851]                                                  |
| ENSMUSG000000032228 | Tcf12        | -0.71 | 0.00 | 0.01 | 0.39  | 0.09 | 0.77 | 0.08  | 0.73 | 1.00   | transcription factor 12 [Source:MGI Symbol:Acc:MGI:101877]                                                                         |
| ENSMUSG000000027828 | Srs3         | -0.33 | 0.00 | 0.01 | -0.01 | 0.98 | 1.00 | 0.08  | 0.46 | 1.00   | signal sequence receptor, gamma [Source:MGI Symbol:Acc:MGI:1914687]                                                                |
| ENSMUSG000000091228 | Gm20390      | -0.31 | 0.00 | 0.01 | 0.13  | 0.04 | 0.46 | 0.02  | 0.85 | 1.00   | predicted gene 20390 [Source:MGI Symbol:Acc:MGI:5141855]                                                                           |
| ENSMUSG000000023068 | Pink2        | -0.69 | 0.00 | 0.01 | 0.09  | 0.15 | 1.00 | -0.16 | 1.00 | 1.00   | phosphatidylinositol 3-kinase protein domain containing 2 [Source:MGI Symbol:Acc:MGI:1914557]                                      |
| ENSMUSG000000047912 | Wdr2         | -0.60 | 0.00 | 0.01 | 0.62  | 0.02 | 0.22 | 0.04  | 0.94 | 1.00   | WD repeat domain 72 [Source:MGI Symbol:Acc:MGI:2385997]                                                                            |
| ENSMUSG000000021592 | Arsk         | -0.82 | 0.00 | 0.01 | 0.32  | 0.24 | 1.00 | -0.01 | 1.00 | 1.00   | arylsulfatase K [Source:MGI Symbol:Acc:MGI:1924291]                                                                                |
| ENSMUSG000000061061 | Polo         | -1.81 | 0.00 | 0.01 | 0.47  | 0.50 | 1.00 | -0.08 | 1.00 | 1.00   | piccolo (presynaptic cytomatrix protein) [Source:MGI Symbol:Acc:MGI:1349390]                                                       |
| ENSMUSG000000040820 | Hlcs         | -1.73 | 0.00 | 0.01 | 0.39  | 0.66 | 1.00 | -0.02 | 1.00 | 1.00   | holocarboxylase synthetase (biotin-[propionyl-Coenzyme A-carboxylase (ATP-hydrolysing)] ligase) [Source:MGI Symbol:Acc:MGI:894646] |
| ENSMUSG000000037852 | Cpe          | -0.72 | 0.00 | 0.01 | -0.35 | 0.18 | 1.00 | -0.20 | 0.38 | 1.00   | carboxypeptidase E [Source:MGI Symbol:Acc:MGI:101932]                                                                              |
| ENSMUSG000000032440 | Tgfbir2      | -0.47 | 0.00 | 0.01 | 0.11  | 0.47 | 1.00 | -0.05 | 0.77 | 1.00   | transforming growth factor, beta receptor II [Source:MGI Symbol:Acc:MGI:98729]                                                     |
| ENSMUSG000000012609 | Tgfbir1      | -1.55 | 0.00 | 0.01 | 0.55  | 0.46 | 1.00 | -0.07 | 1.00 | 1.00   | tubulin tyrosine ligase-like family, member 5 [Source:MGI Symbol:Acc:MGI:2443657]                                                  |
| ENSMUSG000000029154 | Cwh43        | -0.66 | 0.00 | 0.01 | 0.36  | 0.04 | 1.00 | 0.01  | 0.60 | 0.7892 | predicted gene 7892 [Source:MGI Symbol:Acc:MGI:3646299]                                                                            |
| ENSMUSG000000024251 | Tc2b         | -1.30 | 0.00 | 0.01 | 0.91  | 0.03 | 0.38 | 0.01  | 1.00 | 1.00   | retroviral integrase domain containing 28 [Source:MGI Symbol:Acc:MGI:2142873]                                                      |
| ENSMUSG000000024251 | Thada        | -1.30 | 0.00 | 0.01 | 0.91  | 0.03 | 0.38 | 0.01  | 1.00 | 1.00   | thyroid associated associated [Source:MGI Symbol:Acc:MGI:3039623]                                                                  |
| ENSMUSG000000082100 | Glns-ps1     | -1.28 | 0.00 | 0.01 | 0.46  | 0.44 | 1.00 | 0.01  | 1.00 | 1.00   | glutamine synthetase pseudogene 1 [Source:MGI Symbol:Acc:MGI:95740]                                                                |
| ENSMUSG000000001120 | Pcbp3        | -1.14 | 0.00 | 0.01 | 0.70  | 0.06 | 0.61 | 0.15  | 0.62 | 1.00   | poly(C) binding protein 3 [Source:MGI Symbol:Acc:MGI:1890470]                                                                      |
| ENSMUSG000000030522 | Mtmr10       | -0.65 | 0.00 | 0.01 | 0.39  | 0.06 | 0.57 | 0.03  | 0.95 | 1.00   | myotubularin related protein 10 [Source:MGI Symbol:Acc:MGI:2142292]                                                                |
| ENSMUSG000000037049 | Smpd1        | -0.46 | 0.00 | 0.01 | 0.20  | 0.15 | 1.00 | -0.01 | 1.00 | 1.00   | sphingomyelin phosphodiesterase 1, acid lysosomal [Source:MGI Symbol:Acc:MGI:98325]                                                |
| ENSMUSG000000035991 | Pih1h1       | -0.47 | 0.00 | 0.01 | 0.04  | 0.01 | 1.00 | 0.16  | 0.28 | 1.00   | N-acetylphosphatidylethanolamine hydrolase 1 [Source:MGI Symbol:Acc:MGI:1277124]                                                   |
| ENSMUSG000000078902 | Dl5c         | -0.54 | 0.00 | 0.01 | 0.29  | 0.25 | 1.00 | 0.16  | 0.80 | 1.00   | nitric oxide synthase (beta-1) domain containing protein 1 [Source:MGI Symbol:Acc:MGI:1330230]                                     |
| ENSMUSG000000022332 | Khdhb3       | -1.16 | 0.00 | 0.01 | 0.26  | 0.68 | 1.00 | 0.14  | 0.76 | 1.00   | KH domain containing, RNA binding, signal transduction associated 3 [Source:MGI Symbol:Acc:MGI:1313312]                            |
| ENSMUSG000000078493 | A930039A15Rk | -1.25 | 0.00 | 0.01 | 0.38  | 0.45 | 1.00 | -0.06 | 0.91 | 1.00   | RIKEN cDNA A930039A15 gene [Source:MGI Symbol:Acc:MGI:3641728]                                                                     |
| ENSMUSG000000033096 | Apmap        | -0.50 | 0.00 | 0.01 | 0.22  | 0.16 | 1.00 | -0.11 | 0.50 | 1.00   | adipocyte plasma membrane associated protein [Source:MGI Symbol:Acc:MGI:1919131]                                                   |
| ENSMUSG000000045968 | 5830403L16Rk | -1.20 | 0.00 | 0.01 | 0.42  | 0.32 | 1.00 | 0.20  | 0.60 | 1.00   | RIKEN cDNA 5830403L16 gene [Source:MGI Symbol:Acc:MGI:1923273]                                                                     |
| ENSMUSG000000063063 | Ctnna2       | -2.71 | 0.00 | 0.01 | 1.29  | 0.29 | 1.00 | 0.28  | 0.73 | 1.00   | catenin (cadherin associated protein), alpha 2 [Source:MGI Symbol:Acc:MGI:88275]                                                   |
| ENSMUSG000000034158 | Lncr5b       | -0.36 | 0.00 | 0.01 | 0.23  | 0.03 | 0.33 | 0.03  | 0.01 | 1.00   | leucine rich repeat containing 58 [Source:MGI Symbol:Acc:MGI:2443542]                                                              |
| ENSMUSG000000029154 | Cwh43        | -0.66 | 0.00 | 0.01 | 0.36  | 0.04 | 1.00 | 0.01  | 0.60 | 0.7892 | predicted gene 7892 [Source:MGI Symbol:Acc:MGI:3646299]                                                                            |
| ENSMUSG000000044708 | Kcnj10       | -0.57 | 0.00 | 0.01 | 0.31  | 0.09 | 0.78 | -0.05 | 0.82 | 1.00   | potassium inwardly-rectifying channel, subfamily J, member 10 [Source:MGI Symbol:Acc:MGI:1194504]                                  |
| ENSMUSG000000071650 | Ganab        | -0.30 | 0.00 | 0.01 | 0.10  | 0.26 | 1.00 | 0.04  | 0.72 | 1.00   | alpha glucosidase 2 alpha neutral subunit [Source:MGI Symbol:Acc:MGI:1097667]                                                      |
| ENSMUSG000000022013 | Dnajc15      | -0.73 | 0.00 | 0.01 | 0.44  | 0.06 | 0.58 | 0.15  | 0.53 | 1.00   | DnaJ (Hsp40) homolog, subfamily C, member 15 [Source:MGI Symbol:Acc:MGI:1913398]                                                   |
| ENSMUSG000000032349 | Elof5        | -0.57 | 0.00 | 0.01 | 0.33  | 0.08 | 0.70 | 0.10  | 0.62 | 1.00   | ELOVL family member 5, elongation of long chain fatty acids (yeast) [Source:MGI Symbol:Acc:MGI:1966051]                            |
| ENSMUSG000000010453 | Kansl3       | -0.41 | 0.00 | 0.01 | -0.01 | 0.97 | 1.00 | -0.06 | 0.65 | 1.00   | KAT5 regulatory NSL complex subunit 3 [Source:MGI Symbol:Acc:MGI:1918055]                                                          |
| ENSMUSG000000038807 | Rap1gap2     | -0.70 | 0.00 | 0.01 | 0.14  | 0.63 | 1.00 | -0.15 | 0.47 | 1.00   | RAP1 GTPase activating protein 2 [Source:MGI Symbol:Acc:MGI:3028623]                                                               |
| ENSMUSG000000030764 | Mtmr16       | -0.43 | 0.00 | 0.01 | 0.38  | 0.09 | 0.76 | -0.13 | 0.62 | 1.00   | transmembrane protein 16 [Source:MGI Symbol:Acc:MGI:2683541]                                                                       |
| ENSMUSG000000019864 | Rtn4p1       | -0.64 | 0.00 | 0.01 | 0.49  | 0.01 | 0.20 | 0.14  | 0.50 | 1.00   | reticulon 4 interacting protein 1 [Source:MGI Symbol:Acc:MGI:2178759]                                                              |
| ENSMUSG000000061751 | Kalrn        | -1.47 | 0.00 | 0.01 | 0.41  | 0.60 | 1.00 | 0.13  | 0.72 | 1.00   | kalirin, rhoGEF kinase [Source:MGI Symbol:Acc:MGI:2685385]                                                                         |
| ENSMUSG000000062190 | Lanc2        | -1.37 | 0.00 | 0.01 | 0.64  | 0.26 | 1.00 | 0.07  | 1.00 | 1.00   | LanC (bacterial lipoteichoic acid synthetase component C)-like 2 [Source:MGI Symbol:Acc:MGI:1919085]                               |
| ENSMUSG000000039208 | Meitr1       | -1.03 | 0.00 | 0.01 | 0.42  | 0.28 | 1.00 | -0.01 | 1.00 | 1.00   | metoerin, glial cell differentiation regulator-like [Source:MGI Symbol:Acc:MGI:2384806]                                            |
| ENSMUSG000000014294 | Ndufa2       | -0.41 | 0.00 | 0.01 | 0.32  | 0.00 | 0.08 | 0.12  | 0.39 | 1.00   | NADH dehydrogenase (ubiquinone) 1 alpha subcomplex, 2 [Source:MGI Symbol:Acc:MGI:1343103]                                          |
| ENSMUSG000000018909 | Arnt1        | -0.57 | 0.00 | 0.01 | 0.33  | 0.07 | 0.64 | -0.06 | 0.75 | 1.00   | arrestin, beta 1 [Source:MGI Symbol:Acc:MGI:59473]                                                                                 |
| ENSMUSG000000029154 | Cwh43        | -0.66 | 0.00 | 0.01 | 0.36  | 0.04 | 1.00 | 0.01  | 0.60 | 0.7892 | predicted gene 7892 [Source:MGI Symbol:Acc:MGI:3646299]                                                                            |
| ENSMUSG000000008416 | Gm14002      | -0.40 | 0.00 | 0.01 | 0.13  | 0.49 | 1.00 | -0.04 | 0.   |        |                                                                                                                                    |

|                      |              |       |      |      |       |      |      |       |      |      |                                                                                                                                |
|----------------------|--------------|-------|------|------|-------|------|------|-------|------|------|--------------------------------------------------------------------------------------------------------------------------------|
| ENSMUSG00000078772   | Gm12353      | -0.90 | 0.00 | 0.02 | 0.52  | 0.12 | 0.92 | 0.10  | 0.79 | 1.00 | predicted gene 12353 [Source:MGJ Symbol:Acc:MGJ:3699710]                                                                       |
| ENSMUSG00000026495   | Elfca2       | -1.48 | 0.00 | 0.02 | 0.45  | 0.44 | 1.00 | 0.08  | 1.00 | 1.00 | EF-hand calcium binding domain 2 [Source:MGJ Symbol:Acc:MGJ:1915476]                                                           |
| ENSMUSG00000075304   | Sp5          | -1.16 | 0.00 | 0.02 | 0.72  | 0.10 | 0.84 | 0.01  | 1.00 | 1.00 | trans-acting transcription factor 5 [Source:MGJ Symbol:Acc:MGJ:1927715]                                                        |
| ENSMUSG00000022246   | Rca1         | -0.61 | 0.00 | 0.02 | 0.29  | 0.18 | 1.00 | -0.03 | 0.95 | 1.00 | retinoic acid inducible 14 [Source:MGJ Symbol:Acc:MGJ:1922896]                                                                 |
| ENSMUSG00000047347   | Gm5806       | -0.85 | 0.00 | 0.02 | 0.03  | 1.00 | 1.00 | -0.81 | 0.01 | 1.00 | predicted gene 5806 [Source:MGJ Symbol:Acc:MGJ:3645587]                                                                        |
| ENSMUSG00000030101   | Sumf1        | -0.54 | 0.00 | 0.02 | 0.25  | 0.17 | 1.00 | 0.10  | 0.60 | 1.00 | sulfatase modifying factor 1 [Source:MGJ Symbol:Acc:MGJ:1889844]                                                               |
| ENSMUSG00000085998   | AW82252      | -1.94 | 0.00 | 0.02 | 0.67  | 0.45 | 1.00 | -0.08 | 1.00 | 1.00 | expressed sequence AW82252 [Source:MGJ Symbol:Acc:MGJ:2148030]                                                                 |
| ENSMUSG00000042064   | Myo3b        | -1.92 | 0.00 | 0.02 | 0.59  | 0.45 | 1.00 | -0.09 | 1.00 | 1.00 | myosin IIB [Source:MGJ Symbol:Acc:MGJ:2448580]                                                                                 |
| ENSMUSG00000001949   | Tmc07        | -1.71 | 0.00 | 0.02 | 0.99  | 0.19 | 1.00 | 0.00  | 1.00 | 1.00 | transmembrane and coiled-coil domains 7 [Source:MGJ Symbol:Acc:MGJ:2142786]                                                    |
| ENSMUSG000000021981  | Cab39l       | -0.80 | 0.00 | 0.02 | 0.38  | 0.02 | 0.29 | -0.02 | 0.92 | 1.00 | calcium binding protein 39-like [Source:MGJ Symbol:Acc:MGJ:1914081]                                                            |
| ENSMUSG00000002246   | Rer1         | -0.61 | 0.00 | 0.02 | 0.29  | 0.18 | 1.00 | -0.12 | 0.46 | 1.00 | crista junctional protein 14 [Source:MGJ Symbol:Acc:MGJ:1349469]                                                               |
| ENSMUSG00000044308   | Ubr3         | -0.37 | 0.00 | 0.02 | 0.33  | 0.00 | 0.05 | 0.13  | 0.31 | 1.00 | ubiquitin protein ligase E3 component nrcogin 3 [Source:MGJ Symbol:Acc:MGJ:1861100]                                            |
| ENSMUSG00000002172   | Ralgapa1     | -0.55 | 0.00 | 0.02 | 0.43  | 0.02 | 0.22 | 0.09  | 0.66 | 1.00 | Ral GTPase activating protein, alpha subunit 1 [Source:MGJ Symbol:Acc:MGJ:1931050]                                             |
| ENSMUSG000000017037  | Camkmt       | -2.74 | 0.00 | 0.02 | 0.15  | 1.00 | 1.00 | -0.07 | 1.00 | 1.00 | calmodulin-lysine N-methyltransferase [Source:MGJ Symbol:Acc:MGJ:1920832]                                                      |
| ENSMUSG000000062962  | Gm6378       | -2.44 | 0.00 | 0.02 | 0.85  | 0.73 | 1.00 | 0.31  | 0.72 | 1.00 | predicted pseudogene 6378 [Source:MGJ Symbol:Acc:MGJ:3647253]                                                                  |
| ENSMUSG000000038502  | Plov1        | -0.48 | 0.00 | 0.02 | 0.21  | 0.18 | 1.00 | 0.00  | 1.00 | 1.00 | prostate tumor over expressed gene 1 [Source:MGJ Symbol:Acc:MGJ:1933946]                                                       |
| ENSMUSG000000021375  | Klf13a       | -0.80 | 0.00 | 0.02 | 0.51  | 0.07 | 0.62 | 0.05  | 0.87 | 1.00 | kinein family member 13A [Source:MGJ Symbol:Acc:MGJ:1928264]                                                                   |
| ENSMUSG00000002948   | Rer1         | -0.34 | 0.00 | 0.02 | 0.06  | 0.58 | 1.00 | -0.05 | 0.70 | 1.00 | RER1 retention in endoplasmic reticulum 1 homolog (S. cerevisiae) [Source:MGJ Symbol:Acc:MGJ:1915080]                          |
| ENSMUSG000000028410  | DnaJ1        | -0.38 | 0.00 | 0.02 | -0.02 | 0.83 | 1.00 | 0.24  | 0.07 | 1.00 | DnaJ (Hsp40) homolog, subfamily A, member 1 [Source:MGJ Symbol:Acc:MGJ:1270129]                                                |
| ENSMUSG000000045045  | Lfn4         | -1.06 | 0.00 | 0.02 | 0.14  | 0.79 | 1.00 | -0.31 | 0.39 | 1.00 | leucine rich repeat and fibronectin type III domain containing 4 [Source:MGJ Symbol:Acc:MGJ:2385612]                           |
| ENSMUSG00000045867   | Cradd        | -1.45 | 0.00 | 0.02 | 0.92  | 0.07 | 0.67 | 0.03  | 1.00 | 1.00 | CASP2 and RIPK1 domain containing adaptor with death domain [Source:MGJ Symbol:Acc:MGJ:1336168]                                |
| ENSMUSG000000085772  | D630024D03Rk | -1.38 | 0.00 | 0.02 | 0.65  | 0.23 | 1.00 | -0.34 | 0.42 | 1.00 | RIKEN cDNA D630024D03 gene [Source:MGJ Symbol:Acc:MGJ:3041224]                                                                 |
| ENSMUSG000000073096  | Lrc61        | -0.60 | 0.00 | 0.02 | 0.50  | 0.01 | 0.17 | 0.08  | 0.71 | 1.00 | leucine rich repeat containing 61 [Source:MGJ Symbol:Acc:MGJ:2652848]                                                          |
| ENSMUSG000000019189  | Rnf145       | -0.39 | 0.00 | 0.02 | 0.02  | 0.90 | 1.00 | 0.00  | 1.00 | 1.00 | ring finger protein 145 [Source:MGJ Symbol:Acc:MGJ:1921565]                                                                    |
| ENSMUSG000000005394  | Cy5b         | -1.00 | 0.00 | 0.02 | 0.42  | 0.91 | 1.00 | -0.25 | 0.11 | 1.00 | cytochrome, type IV, alpha 2 [Source:MGJ Symbol:Acc:MGJ:168465]                                                                |
| ENSMUSG000000052340  | Zfp101       | -1.01 | 0.00 | 0.02 | 0.28  | 0.47 | 1.00 | -0.10 | 0.84 | 1.00 | zinc finger protein 101 [Source:MGJ Symbol:Acc:MGJ:1075474]                                                                    |
| ENSMUSG000000027339  | Rassf2       | -1.99 | 0.00 | 0.02 | 0.48  | 0.77 | 1.00 | 0.12  | 0.87 | 1.00 | Ras association (RalGDS/AF-6) domain family member 2 [Source:MGJ Symbol:Acc:MGJ:2442060]                                       |
| ENSMUSG000000076372  | Mir568       | -1.82 | 0.00 | 0.02 | 0.88  | 0.33 | 1.00 | -0.12 | 1.00 | 1.00 | microRNA 568 [Source:MGJ Symbol:Acc:MGJ:3718548]                                                                               |
| ENSMUSG000000036817  | Sun1         | -0.51 | 0.00 | 0.02 | 0.12  | 0.54 | 1.00 | -0.14 | 0.44 | 1.00 | Sad1 and UNC84 domain containing 1 [Source:MGJ Symbol:Acc:MGJ:1924303]                                                         |
| ENSMUSG000000067719  | Gm10221      | -0.40 | 0.00 | 0.02 | 0.23  | 0.07 | 0.62 | 0.12  | 0.38 | 1.00 | predicted gene 10221 [Source:MGJ Symbol:Acc:MGJ:3708709]                                                                       |
| ENSMUSG000000008999  | Bmp7         | -0.65 | 0.00 | 0.02 | 0.56  | 0.01 | 0.11 | 0.06  | 0.79 | 1.00 | bone morphogenetic protein 7 [Source:MGJ Symbol:Acc:MGJ:103302]                                                                |
| ENSMUSG000000022799  | F3h2         | -1.54 | 0.00 | 0.02 | 0.76  | 0.18 | 1.00 | 0.11  | 0.89 | 1.00 | chromodomain protein, Y chromosome-like 2 [Source:MGJ Symbol:Acc:MGJ:1923046]                                                  |
| ENSMUSG000000006529  | Lbr1         | -1.51 | 0.00 | 0.02 | 0.28  | 0.54 | 1.00 | -0.40 | 0.37 | 1.00 | alpha trypsin inhibitor, heavy chain 1 [Source:MGJ Symbol:Acc:MGJ:96618]                                                       |
| ENSMUSG0000000078139 | AK157302     | -0.48 | 0.00 | 0.02 | 0.25  | 0.11 | 0.89 | 0.04  | 0.85 | 1.00 | cDNA sequence AK157302 [Source:MGJ Symbol:Acc:MGJ:3574096]                                                                     |
| ENSMUSG000000031605  | Khl2         | -0.59 | 0.00 | 0.02 | 0.20  | 0.36 | 1.00 | -0.15 | 0.42 | 1.00 | kelch-like 2, Maytan (Drosophila) [Source:MGJ Symbol:Acc:MGJ:1924363]                                                          |
| ENSMUSG000000030802  | Bckdk        | -0.47 | 0.00 | 0.02 | 0.30  | 0.05 | 0.53 | -0.06 | 0.71 | 1.00 | branched chain ketoacid dehydrogenase kinase [Source:MGJ Symbol:Acc:MGJ:1276121]                                               |
| ENSMUSG000000055692  | Tmem191c     | -0.93 | 0.00 | 0.02 | 0.39  | 0.26 | 1.00 | 0.06  | 0.93 | 1.00 | transmembrane protein 191C [Source:MGJ Symbol:Acc:MGJ:107238]                                                                  |
| ENSMUSG000000005921  | Unc5c        | -2.09 | 0.00 | 0.02 | 1.23  | 0.12 | 0.91 | -0.19 | 0.86 | 1.00 | unc-5 homolog C (C. elegans) [Source:MGJ Symbol:Acc:MGJ:1095412]                                                               |
| ENSMUSG000000022799  | F3h2         | -0.54 | 0.00 | 0.02 | 0.76  | 0.18 | 1.00 | 0.11  | 0.89 | 1.00 | chromodomain protein, Y chromosome-like 2 [Source:MGJ Symbol:Acc:MGJ:1923046]                                                  |
| ENSMUSG000000006529  | Lbr1         | -1.51 | 0.00 | 0.02 | 0.28  | 0.54 | 1.00 | -0.40 | 0.37 | 1.00 | alpha trypsin inhibitor, heavy chain 1 [Source:MGJ Symbol:Acc:MGJ:96618]                                                       |
| ENSMUSG000000030259  | Rassf8       | -0.61 | 0.00 | 0.02 | 0.32  | 0.14 | 1.00 | -0.03 | 0.86 | 1.00 | Ras association (RalGDS/AF-6) domain family member 8 [Source:MGJ Symbol:Acc:MGJ:1918573]                                       |
| ENSMUSG000000002214  | Dcaf11       | -0.30 | 0.00 | 0.02 | 0.24  | 0.01 | 0.15 | -0.04 | 0.77 | 1.00 | DBD1 and CUL4 associated factor 11 [Source:MGJ Symbol:Acc:MGJ:90168]                                                           |
| ENSMUSG000000070394  | 1810027010Rk | -0.52 | 0.00 | 0.02 | 0.33  | 0.07 | 0.63 | -0.05 | 0.78 | 1.00 | RIKEN cDNA 1810027010 gene [Source:MGJ Symbol:Acc:MGJ:1916436]                                                                 |
| ENSMUSG000000094665  | U6           | -1.28 | 0.00 | 0.02 | -0.29 | 0.72 | 1.00 | -0.60 | 0.16 | 1.00 | U6 spliceosomal RNA [Source:RFAM:Acc:RF00026]                                                                                  |
| ENSMUSG000000047045  | Tmem164      | -0.74 | 0.00 | 0.02 | 0.41  | 0.10 | 0.82 | 0.04  | 0.94 | 1.00 | transmembrane protein 164 [Source:MGJ Symbol:Acc:MGJ:2148020]                                                                  |
| ENSMUSG000000079488  | Cd47         | -0.88 | 0.00 | 0.02 | 0.43  | 0.18 | 1.00 | 0.07  | 0.86 | 1.00 | CD47 antigen (Rh-related antigen, integrin-associated signal transducer) [Source:MGJ Symbol:Acc:MGJ:96617]                     |
| ENSMUSG000000023054  | Rnf101       | -0.86 | 0.00 | 0.02 | 0.73  | 0.01 | 0.18 | 0.05  | 0.93 | 1.00 | ataxin 7-like 1 [Source:MGJ Symbol:Acc:MGJ:16584458]                                                                           |
| ENSMUSG000000001405  | Cttnb2       | -0.84 | 0.00 | 0.02 | 0.08  | 0.04 | 0.48 | -0.02 | 1.00 | 1.00 | cyclin G2 [Source:MGJ Symbol:Acc:MGJ:2151054]                                                                                  |
| ENSMUSG000000032340  | Neof1        | -0.60 | 0.00 | 0.02 | 0.30  | 0.15 | 1.00 | -0.13 | 0.56 | 1.00 | neoggin [Source:MGJ Symbol:Acc:MGJ:1097159]                                                                                    |
| ENSMUSG000000073889  | Il11ra1      | -0.50 | 0.00 | 0.02 | 0.27  | 0.14 | 1.00 | -0.04 | 0.87 | 1.00 | interleukin 11 receptor, alpha chain 1 [Source:MGJ Symbol:Acc:MGJ:107426]                                                      |
| ENSMUSG000000022884  | Eif4a2       | -0.23 | 0.00 | 0.02 | 0.01  | 0.89 | 1.00 | -0.01 | 0.89 | 1.00 | eukaryotic translation initiation factor 4A2 [Source:MGJ Symbol:Acc:MGJ:106906]                                                |
| ENSMUSG000000027965  | Olfm3        | -1.04 | 0.00 | 0.02 | 0.99  | 0.00 | 0.08 | 0.22  | 0.49 | 1.00 | olfactomedin 3 [Source:MGJ Symbol:Acc:MGJ:2387329]                                                                             |
| ENSMUSG000000014850  | Msh3         | -1.04 | 0.00 | 0.02 | 0.71  | 0.06 | 0.56 | -0.01 | 1.00 | 1.00 | mus81 homolog 3 (E. coli) [Source:MGJ Symbol:Acc:MGJ:109519]                                                                   |
| ENSMUSG000000027965  | F3h2         | -0.54 | 0.00 | 0.02 | 0.76  | 0.18 | 1.00 | 0.11  | 0.89 | 1.00 | FYVE, RhoGEF, and PH domain containing 4 [Source:MGJ Symbol:Acc:MGJ:2183747]                                                   |
| ENSMUSG000000018426  | Gq4          | -0.26 | 0.00 | 0.02 | 0.04  | 0.06 | 0.56 | 0.07  | 1.00 | 1.00 | transmembrane helix DNA binding protein 4 [Source:MGJ Symbol:Acc:MGJ:1344395]                                                  |
| ENSMUSG000000009304  | Tomn20       | -0.29 | 0.00 | 0.02 | 0.16  | 0.07 | 0.63 | 0.06  | 0.58 | 1.00 | translocase of outer mitochondrial membrane 20 homolog (yeast) [Source:MGJ Symbol:Acc:MGJ:1915202]                             |
| ENSMUSG000000044026  | Tmem20       | -0.72 | 0.00 | 0.02 | 0.29  | 0.29 | 1.00 | -0.01 | 1.00 | 1.00 | transmembrane protein 20 [Source:MGJ Symbol:Acc:MGJ:2444789]                                                                   |
| ENSMUSG000000028973  | Abcb8        | -0.48 | 0.00 | 0.02 | 0.38  | 0.02 | 0.22 | -0.03 | 0.89 | 1.00 | ATP-binding cassette, sub-family B (MDR/TAP), member 8 [Source:MGJ Symbol:Acc:MGJ:1351667]                                     |
| ENSMUSG000000067567  | Hdac8        | -1.63 | 0.00 | 0.02 | 0.90  | 0.23 | 1.00 | 0.00  | 1.00 | 1.00 | histone deacetylase 8 [Source:MGJ Symbol:Acc:MGJ:1917565]                                                                      |
| ENSMUSG000000073719  | Vps13d       | -1.09 | 0.00 | 0.02 | 0.61  | 0.12 | 0.94 | -0.06 | 0.92 | 1.00 | vacuolar protein sorting 13 D (yeast) [Source:MGJ Symbol:Acc:MGJ:2448530]                                                      |
| ENSMUSG000000001254  | Fspn7        | -0.69 | 0.00 | 0.02 | 0.44  | 0.16 | 0.10 | 0.11  | 0.73 | 1.00 | ataxin 7-like 1 [Source:MGJ Symbol:Acc:MGJ:1298407]                                                                            |
| ENSMUSG000000041737  | Tmem45b      | -0.69 | 0.00 | 0.02 | 0.02  | 0.98 | 1.00 | 0.00  | 1.00 | 1.00 | transmembrane protein 45b [Source:MGJ Symbol:Acc:MGJ:2284574]                                                                  |
| ENSMUSG000000037685  | Atpsa1       | -0.99 | 0.00 | 0.02 | -0.17 | 0.69 | 1.00 | -0.16 | 0.61 | 1.00 | ATPase, aminophospholipid transporter (APLT), type I, class 8A, member 1 [Source:MGJ Symbol:Acc:MGJ:1330848]                   |
| ENSMUSG000000005547  | Cyp2a5       | -0.54 | 0.00 | 0.02 | -0.46 | 0.01 | 0.09 | -0.37 | 0.02 | 1.00 | cytochrome P450, family 2, subfamily A, polypeptide 5 [Source:MGJ Symbol:Acc:MGJ:88597]                                        |
| ENSMUSG000000024795  | Kif20b       | -1.36 | 0.00 | 0.02 | -0.05 | 1.00 | 1.00 | 0.84  | 0.01 | 1.00 | kinesin family member 20B [Source:MGJ Symbol:Acc:MGJ:2444576]                                                                  |
| ENSMUSG000000074749  | Plk1         | -0.80 | 0.00 | 0.02 | 0.48  | 0.08 | 0.69 | 0.10  | 0.75 | 1.00 | polo-like kinase 1 substrate 1 [Source:MGJ Symbol:Acc:MGJ:2684960]                                                             |
| ENSMUSG000000019818  | Cd164        | -0.24 | 0.00 | 0.02 | -0.02 | 0.76 | 1.00 | 0.03  | 0.79 | 1.00 | CD164 antigen [Source:MGJ Symbol:Acc:MGJ:1859568]                                                                              |
| ENSMUSG000000033083  | Tctc194      | -1.04 | 0.00 | 0.02 | 0.42  | 0.26 | 1.00 | -0.14 | 0.68 | 1.00 | TBC1 domain family, member 4 [Source:MGJ Symbol:Acc:MGJ:2429660]                                                               |
| ENSMUSG000000008172  | Sno2         | -0.81 | 0.00 | 0.02 | 0.14  | 0.98 | 1.00 | -0.02 | 1.00 | 1.00 | transmembrane transport 140 [Source:MGJ Symbol:Acc:MGJ:2146950]                                                                |
| ENSMUSG0000000038291 | Snox2        | -0.01 | 0.00 | 0.02 | 0.51  | 0.07 | 0.66 | 0.02  | 1.00 | 1.00 | sorting nexin 25 [Source:MGJ Symbol:Acc:MGJ:2142610]                                                                           |
| ENSMUSG000000019769  | Syne1        | -0.88 | 0.00 | 0.03 | 0.09  | 0.82 | 1.00 | -0.15 | 0.70 | 1.00 | synaptic nuclear envelope 1 [Source:MGJ Symbol:Acc:MGJ:1927152]                                                                |
| ENSMUSG000000022844  | Pdia5        | -1.22 | 0.00 | 0.03 | 0.73  | 0.11 | 0.87 | -0.06 | 1.00 | 1.00 | protein disulfide isomerase associated 5 [Source:MGJ Symbol:Acc:MGJ:1919849]                                                   |
| ENSMUSG000000030706  | Gm11408      | -1.22 | 0.00 | 0.03 | 0.33  | 0.53 | 1.00 | 0.21  | 0.57 | 1.00 | predicted gene 11408 [Source:MGJ Symbol:Acc:MGJ:3651130]                                                                       |
| ENSMUSG000000030022  | Adams19      | -0.88 | 0.00 | 0.03 | 0.58  | 0.05 | 0.55 | 0.08  | 0.86 | 1.00 | a disintegrin-like and metalloprotease (prolysin type) with thrombospondin type 1 motif, 9 [Source:MGJ Symbol:Acc:MGJ:1916320] |
| ENSMUSG000000022377  | Asap1        | -0.88 | 0.00 | 0.03 | 0.43  | 0.18 | 1.00 | 0.11  | 0.72 | 1.00 | ArlGAP with SH3 domain, ankyrin repeat and PH domain [Source:MGJ Symbol:Acc:MGJ:1342335]                                       |
| ENSMUSG000000006530  | Smc1         | -0.59 | 0.00 | 0.03 | 0.03  | 0.98 | 1.00 | 0.09  | 0.85 | 1.00 | SMC1 domain containing 1 [Source:MGJ Symbol:Acc:MGJ:1918889]                                                                   |
| ENSMUSG000000009739  | Pou6f1       | -0.58 | 0.00 | 0.03 | 0.24  | 0.27 | 1.00 | -0.04 | 0.90 | 1.00 | POU domain, class 6, transcription factor 1 [Source:MGJ Symbol:Acc:MGJ:102935]                                                 |
| ENSMUSG000000026365  | Ch           | -0.51 | 0.00 | 0.03 | -0.08 | 0.60 | 1.00 | 0.04  | 0.86 | 1.00 | complement component factor h [Source:MGJ Symbol:Acc:MGJ:88385]                                                                |
| ENSMUSG000000030905  | Crym         | -0.44 | 0.00 | 0.03 | 0.35  | 0.02 | 0.23 | -0.06 | 0.69 | 1.00 | crystallin, mu [Source:MGJ Symbol:Acc:MGJ:102675]                                                                              |
| ENSMUSG000000041216  | C1vs1        | -1.69 | 0.00 | 0.03 | 1.02  | 0.15 | 1.00 | -0.07 | 1.00 | 1.00 | clavesin 1 [Source:MGJ Symbol:Acc:MGJ:1921688]                                                                                 |
| ENSMUSG000000031684  | Slc10a7      | -1.83 | 0.00 | 0.03 | 0.68  | 0.38 | 1.00 | 0.04  | 1.00 | 1.00 | solute carrier family 10 (sodium/bile acid cotransporter family), member 7 [Source:MGJ Symbol:Acc:MGJ:1924025]                 |
| ENSMUSG000000085897  | Mpl450       | -1.61 | 0.00 | 0.03 | 0.88  | 0.21 | 1.00 | 0.10  | 1.00 | 1.00 | predicted gene 14540 [Source:MGJ Symbol:Acc:MGJ:3705140]                                                                       |
| ENSMUSG000000005236  | Slc12a8      | -0.84 | 0.00 | 0.03 | 0.08  | 0.98 | 1.00 | -0.17 |      |      |                                                                                                                                |

|                     |               |       |      |      |       |      |        |       |      |      |                                                                                                                        |
|---------------------|---------------|-------|------|------|-------|------|--------|-------|------|------|------------------------------------------------------------------------------------------------------------------------|
| ENSMUSG00000022309  | Angpt1        | -1.29 | 0.00 | 0.03 | 0.28  | 0.72 | 1.00   | -0.03 | 1.00 | 1.00 | angiopoietin 1 [Source:MGJ SymbolAcc:MGJ:108448]                                                                       |
| ENSMUSG00000027634  | Ndir3         | -0.44 | 0.00 | 0.03 | 0.31  | 0.04 | 0.40   | -0.03 | 0.89 | 1.00 | N-myc downstream regulated gene 3 [Source:MGJ SymbolAcc:MGJ:1352499]                                                   |
| ENSMUSG00000042302  | Ehbp1         | -1.18 | 0.00 | 0.03 | 1.01  | 0.01 | 0.21   | 0.09  | 0.91 | 1.00 | EH domain binding protein 2 [Source:MGJ SymbolAcc:MGJ:2667252]                                                         |
| ENSMUSG00000034930  | Sca2a12       | -1.16 | 0.00 | 0.03 | 0.64  | 0.14 | 1.00   | -0.06 | 0.91 | 1.00 | solute carrier family 2 (facilitated glucose transporter), member 12 [Source:MGJ SymbolAcc:MGJ:3052471]                |
| ENSMUSG00000042675  | Ypeb3         | -0.46 | 0.00 | 0.03 | 0.11  | 0.50 | 1.00   | -0.15 | 0.39 | 1.00 | yippebe-like 3 (Drosophila) [Source:MGJ SymbolAcc:MGJ:1913340]                                                         |
| ENSMUSG00000038663  | Syde2         | -0.71 | 0.00 | 0.03 | 0.61  | 0.01 | 0.19   | -0.08 | 0.75 | 1.00 | synapse defective 1, Rho GTPase, homolog 2 (C. elegans) [Source:MGJ SymbolAcc:MGJ:3036264]                             |
| ENSMUSG00000029016  | Cln6          | -0.70 | 0.00 | 0.03 | 0.30  | 0.25 | 1.00   | -0.22 | 0.37 | 1.00 | chloride channel 6 [Source:MGJ SymbolAcc:MGJ:1347049]                                                                  |
| ENSMUSG00000026179  | Pnk4          | -0.40 | 0.00 | 0.03 | 0.36  | 0.01 | 0.09   | -0.10 | 0.52 | 1.00 | paroxysmal nonkinetogenic dyskinesia [Source:MGJ SymbolAcc:MGJ:1930773]                                                |
| ENSMUSG00000037016  | Frem2         | -1.20 | 0.00 | 0.03 | 0.34  | 0.51 | 1.00   | -0.01 | 1.00 | 1.00 | Fras1 related extracellular matrix protein 2 [Source:MGJ SymbolAcc:MGJ:2444465]                                        |
| ENSMUSG00000045100  | Slc25a26      | -1.02 | 0.00 | 0.03 | 0.59  | 0.10 | 0.84   | -0.05 | 0.92 | 1.00 | solute carrier family 25 (mitochondrial carrier, phosphate carrier), member 26 [Source:MGJ SymbolAcc:MGJ:1914832]      |
| ENSMUSG00000037898  | Serap1        | -0.35 | 0.00 | 0.03 | 0.39  | 0.24 | 1.00   | -0.09 | 0.79 | 1.00 | stress-associated endoplasmic reticulum protein 1 [Source:MGJ SymbolAcc:MGJ:1918201]                                   |
| ENSMUSG00000030225  | Dera          | -0.52 | 0.00 | 0.03 | 0.36  | 0.04 | 0.46   | 0.04  | 0.86 | 1.00 | 2-deoxyribose-5-phosphate aldolase homolog (C. elegans) [Source:MGJ SymbolAcc:MGJ:1913762]                             |
| ENSMUSG00000036322  | H2-E-ps       | -0.75 | 0.00 | 0.03 | -0.06 | 0.92 | 1.00   | -0.06 | 0.87 | 1.00 | histocompatibility 2, class II antigen E alpha, pseudogene [Source:MGJ SymbolAcc:MGJ:95900]                            |
| ENSMUSG00000025702  | March8        | -0.28 | 0.00 | 0.03 | 0.17  | 0.06 | 0.58   | -0.01 | 0.94 | 1.00 | membrane-associated ring finger (C3HC4) 8 [Source:MGJ SymbolAcc:MGJ:1919029]                                           |
| ENSMUSG00000028763  | Hspg2         | -0.50 | 0.00 | 0.04 | -0.13 | 0.47 | 1.00   | -0.25 | 0.20 | 1.00 | perlecan (heparan sulfate proteoglycan 2) [Source:MGJ SymbolAcc:MGJ:96257]                                             |
| ENSMUSG00000005640  | Insr          | -0.60 | 0.00 | 0.04 | 0.28  | 0.20 | 1.00   | -0.09 | 0.73 | 1.00 | insulin receptor-related receptor [Source:MGJ SymbolAcc:MGJ:1346037]                                                   |
| ENSMUSG00000039899  | Jodc2         | -0.51 | 0.00 | 0.04 | -0.06 | 0.84 | 1.00   | -0.03 | 0.91 | 1.00 | Josephin domain containing 2 [Source:MGJ SymbolAcc:MGJ:1913374]                                                        |
| ENSMUSG00000029188  | Serap12       | -0.35 | 0.00 | 0.04 | 0.39  | 0.24 | 1.00   | -0.09 | 0.79 | 1.00 | serpin peptidase inhibitor type 12 [Source:MGJ SymbolAcc:MGJ:92638]                                                    |
| ENSMUSG00000059851  | Suv420h2      | -0.52 | 0.00 | 0.04 | 0.40  | 0.03 | 0.35   | -0.03 | 0.95 | 1.00 | suppressor of variegation 4-20 homolog 2 (Drosophila) [Source:MGJ SymbolAcc:MGJ:2385262]                               |
| ENSMUSG00000043671  | Dpy19l3       | -1.06 | 0.00 | 0.04 | 0.56  | 0.15 | 1.00   | -0.09 | 0.82 | 1.00 | dpy-19-like 3 (C. elegans) [Source:MGJ SymbolAcc:MGJ:2443952]                                                          |
| ENSMUSG00000039763  | Dnajc28       | -0.92 | 0.01 | 0.04 | 0.41  | 0.25 | 1.00   | -0.06 | 0.92 | 1.00 | Dnaj (Hsp40) homolog, subfamily C, member 28 [Source:MGJ SymbolAcc:MGJ:2181053]                                        |
| ENSMUSG00000059022  | Kcp           | -0.92 | 0.01 | 0.04 | 0.45  | 0.21 | 1.00   | -0.16 | 0.61 | 1.00 | kelin/chordin-like protein [Source:MGJ SymbolAcc:MGJ:2141640]                                                          |
| ENSMUSG00000060681  | Slc9a6        | -0.55 | 0.01 | 0.04 | 0.32  | 0.13 | 0.96   | 0.08  | 0.71 | 1.00 | solute carrier family 9 (sodium/hydrogen exchanger), member 6 [Source:MGJ SymbolAcc:MGJ:2443511]                       |
| ENSMUSG00000002859  | Dock7         | -0.62 | 0.01 | 0.04 | 0.38  | 0.08 | 0.69   | -0.12 | 0.62 | 1.00 | dedicator of cytokinesis 7 [Source:MGJ SymbolAcc:MGJ:1914549]                                                          |
| ENSMUSG00000037898  | Gm7457        | -0.72 | 0.01 | 0.04 | 0.35  | 0.18 | 1.00   | 0.06  | 0.60 | 1.00 | predicted gene 7457 [Source:MGJ SymbolAcc:MGJ:2646124]                                                                 |
| ENSMUSG00000046480  | Scrb4         | -0.70 | 0.01 | 0.04 | 0.35  | 0.18 | 1.00   | 0.06  | 0.88 | 1.00 | sodium channel, type IV, beta 1 [Source:MGJ SymbolAcc:MGJ:2887406]                                                     |
| ENSMUSG000000051339 | 2900026A02Rik | -0.70 | 0.01 | 0.04 | 0.59  | 0.02 | 0.30   | 0.00  | 1.00 | 1.00 | RIKEN cDNA 2900026A02 gene [Source:MGJ SymbolAcc:MGJ:1920194]                                                          |
| ENSMUSG00000042286  | Ccny          | -0.43 | 0.01 | 0.04 | 0.31  | 0.04 | 0.41   | 0.07  | 0.67 | 1.00 | cyclin Y [Source:MGJ SymbolAcc:MGJ:1915224]                                                                            |
| ENSMUSG000000052331 | Ankrd44       | -1.11 | 0.01 | 0.04 | 0.32  | 0.56 | 1.00   | -0.04 | 1.00 | 1.00 | ankyrin repeat domain 44 [Source:MGJ SymbolAcc:MGJ:3045243]                                                            |
| ENSMUSG00000031608  | Gah7          | -1.09 | 0.01 | 0.04 | 0.74  | 0.08 | 0.71   | 0.13  | 0.74 | 1.00 | UDP-N-acetyl-alpha-D-galactosamine: polypeptide N-acetylgalactosaminyltransferase 7 [Source:MGJ SymbolAcc:MGJ:1349449] |
| ENSMUSG00000004447  | Dock5         | -0.62 | 0.01 | 0.04 | 0.40  | 0.08 | 0.69   | 0.11  | 0.62 | 1.00 | dedicator of cytokinesis 5 [Source:MGJ SymbolAcc:MGJ:1914549]                                                          |
| ENSMUSG00000002923  | Elovl6        | -1.43 | 0.01 | 0.04 | 0.68  | 0.13 | 0.59   | 0.20  | 0.91 | 1.00 | small nuclear RNA SNORA17 [Source:MGJ SymbolAcc:MGJ:3646124]                                                           |
| ENSMUSG00000078370  | Gm6316        | -0.35 | 0.01 | 0.04 | 0.18  | 1.14 | 1.00   | -0.02 | 0.89 | 1.00 | predicted pseudogene 6316 [Source:MGJ SymbolAcc:MGJ:3646088]                                                           |
| ENSMUSG00000037949  | Ano10         | -0.67 | 0.01 | 0.04 | 0.67  | 0.01 | 0.09   | 0.12  | 0.65 | 1.00 | annectin 10 [Source:MGJ SymbolAcc:MGJ:2143103]                                                                         |
| ENSMUSG00000040350  | Trim7         | -0.30 | 0.01 | 0.04 | 0.09  | 0.37 | 1.00   | 0.06  | 0.64 | 1.00 | tripartite motif-containing 7 [Source:MGJ SymbolAcc:MGJ:2137353]                                                       |
| ENSMUSG00000002669  | Mcm10         | -1.64 | 0.01 | 0.04 | 0.77  | 0.38 | 1.00   | 0.36  | 0.47 | 1.00 | minichromosome maintenance deficient 10 (S. cerevisiae) [Source:MGJ SymbolAcc:MGJ:1917274]                             |
| ENSMUSG00000036298  | Slc2a13       | -1.63 | 0.01 | 0.04 | 0.63  | 0.50 | 1.00   | 0.16  | 0.77 | 1.00 | solute carrier family 2 (facilitated glucose transporter), member 13 [Source:MGJ SymbolAcc:MGJ:2146030]                |
| ENSMUSG000000040929 | Rtk3          | -1.58 | 0.01 | 0.04 | 0.84  | 0.29 | 1.00   | 0.09  | 1.00 | 1.00 | regulatory factor X, 3 (influences HLA class II expression) [Source:MGJ SymbolAcc:MGJ:106582]                          |
| ENSMUSG00000002785  | Tpm7          | -1.43 | 0.01 | 0.04 | 0.22  | 0.03 | 0.39   | -0.01 | 0.59 | 1.00 | transient receptor potential cation channel, subfamily M, member 7 [Source:MGJ SymbolAcc:MGJ:1929996]                  |
| ENSMUSG00000046668  | Cacx5         | -0.39 | 0.01 | 0.04 | 0.26  | 0.06 | 0.56   | 0.25  | 0.10 | 1.00 | CXCR3 ligand 5 [Source:MGJ SymbolAcc:MGJ:1914643]                                                                      |
| ENSMUSG000000052459 | Atp6v1a       | -0.22 | 0.01 | 0.04 | 0.14  | 0.02 | 0.23   | 0.19  | 0.05 | 1.00 | ATPase, H+ transporting, lysosomal V1 subunit A [Source:MGJ SymbolAcc:MGJ:1201780]                                     |
| ENSMUSG00000053317  | Sec61b        | -0.59 | 0.01 | 0.04 | 0.32  | 0.15 | 1.00   | 0.06  | 0.84 | 1.00 | Sec61 beta subunit [Source:MGJ SymbolAcc:MGJ:1913462]                                                                  |
| ENSMUSG000000068732 | Tmem167b      | -0.46 | 0.01 | 0.04 | 0.15  | 0.37 | 1.00   | 0.00  | 1.00 | 1.00 | transmembrane protein 167b [Source:MGJ SymbolAcc:MGJ:1914745]                                                          |
| ENSMUSG00000090105  | Gm15890       | -1.14 | 0.01 | 0.04 | 0.97  | 0.02 | 0.23   | 0.05  | 0.91 | 1.00 | predicted gene 15890 [Source:MGJ SymbolAcc:MGJ:3802160]                                                                |
| ENSMUSG000000064792 | SNORA32       | -1.11 | 0.01 | 0.04 | 0.47  | 0.30 | 1.00   | 0.14  | 0.82 | 1.00 | Small nuclear RNA SNORA32 [Source:MGJ SymbolAcc:MGJ:3802160]                                                           |
| ENSMUSG00000059586  | Nsmc2         | -0.51 | 0.01 | 0.04 | 0.68  | 0.13 | 0.59   | 0.20  | 0.91 | 1.00 | non-SMC element 2 homolog (MMS21, S. cerevisiae) [Source:MGJ SymbolAcc:MGJ:1915751]                                    |
| ENSMUSG00000002661  | Scrb4         | -0.51 | 0.01 | 0.04 | 0.35  | 0.18 | 1.00   | 0.06  | 0.69 | 1.00 | sodium channel, type IV, beta 1 [Source:MGJ SymbolAcc:MGJ:192271]                                                      |
| ENSMUSG000000064349 | mt-Tc         | -1.21 | 0.01 | 0.04 | -0.60 | 0.02 | 0.31   | 0.14  | 0.80 | 1.00 | mitochondrially encoded tRNA cysteine [Source:MGJ SymbolAcc:MGJ:102490]                                                |
| ENSMUSG00000046254  | Eth1          | -0.33 | 0.01 | 0.04 | 0.03  | 0.82 | 1.00   | -0.04 | 0.79 | 1.00 | ethylmalonic encephalopathy 1 [Source:MGJ SymbolAcc:MGJ:1913321]                                                       |
| ENSMUSG000000026740 | Dnajc1        | -0.52 | 0.01 | 0.04 | 0.36  | 0.06 | 0.56   | 0.06  | 0.81 | 1.00 | Dnaj (Hsp40) homolog, subfamily C, member 1 [Source:MGJ SymbolAcc:MGJ:103268]                                          |
| ENSMUSG00000006057  | Atp5g1        | -0.31 | 0.01 | 0.04 | 0.26  | 0.01 | 0.10   | 0.13  | 0.26 | 1.00 | ATP synthase, H+ transporting, mitochondrial F0 complex, subunit c1 (subunit 9) [Source:MGJ SymbolAcc:MGJ:107653]      |
| ENSMUSG000000021121 | Bcar3         | -0.70 | 0.01 | 0.04 | 0.32  | 0.22 | 1.00   | -0.23 | 0.37 | 1.00 | breast cancer anti-estrogen resistance 3 [Source:MGJ SymbolAcc:MGJ:1352501]                                            |
| ENSMUSG000000043320 | Mycy2         | -0.79 | 0.01 | 0.04 | 0.28  | 0.41 | 1.00   | -0.16 | 0.59 | 1.00 | ELOVL1 family member 6, elongation of long chain fatty acids (yeast) [Source:MGJ SymbolAcc:MGJ:2156628]                |
| ENSMUSG000000028937 | Aco7          | -1.20 | 0.01 | 0.04 | 0.85  | 0.08 | 0.70   | -0.13 | 0.90 | 1.00 | acyl-CoA thioesterase 7 [Source:MGJ SymbolAcc:MGJ:1917275]                                                             |
| ENSMUSG00000032066  | Bco2          | -1.18 | 0.01 | 0.04 | 0.64  | 0.17 | 1.00   | -0.10 | 0.90 | 1.00 | beta-carotene oxygenase 2 [Source:MGJ SymbolAcc:MGJ:2177468]                                                           |
| ENSMUSG00000005682  | Par2          | -0.56 | 0.01 | 0.04 | 0.15  | 0.51 | 1.00   | -0.12 | 0.59 | 1.00 | PAR2 poly A specific ribonuclease subunit homolog (S. cerevisiae) [Source:MGJ SymbolAcc:MGJ:1918994]                   |
| ENSMUSG00000021044  | Adck1         | -0.88 | 0.01 | 0.04 | 0.50  | 0.13 | 0.98   | -0.15 | 0.63 | 1.00 | aaRF domain containing kinase 1 [Source:MGJ SymbolAcc:MGJ:1919363]                                                     |
| ENSMUSG000000024462 | Gabbr1        | -0.80 | 0.01 | 0.04 | 0.15  | 0.59 | 1.00   | -0.05 | 0.83 | 1.00 | gamma-aminobutyric acid (GABA) B receptor, 1 [Source:MGJ SymbolAcc:MGJ:1860139]                                        |
| ENSMUSG00000002901  | Hbbp          | -0.43 | 0.01 | 0.04 | 0.34  | 0.02 | 0.23   | 0.07  | 0.71 | 1.00 | Hepatitis B virus X interacting protein [Source:MGJ SymbolAcc:MGJ:1915826]                                             |
| ENSMUSG00000009286  | Mycy2         | -0.38 | 0.01 | 0.04 | 0.27  | 0.02 | 0.29   | 0.06  | 0.69 | 1.00 | myc binding protein 2 [Source:MGJ SymbolAcc:MGJ:2179432]                                                               |
| ENSMUSG000000048731 | Gngtbp1       | -0.57 | 0.01 | 0.04 | 0.08  | 0.76 | 1.00   | -0.01 | 1.00 | 1.00 | gametogenin binding protein 1 [Source:MGJ SymbolAcc:MGJ:3055306]                                                       |
| ENSMUSG00000034724  | Cnot6f        | -0.48 | 0.01 | 0.04 | 0.22  | 0.25 | 1.00   | 0.04  | 0.87 | 1.00 | CCR4-NOT transcription complex, subunit 6-like [Source:MGJ SymbolAcc:MGJ:2443154]                                      |
| ENSMUSG000000026603 | Smyd2         | -0.75 | 0.01 | 0.04 | 0.28  | 0.38 | 1.00   | -0.14 | 0.66 | 1.00 | SET and MYND domain containing 2 [Source:MGJ SymbolAcc:MGJ:1915889]                                                    |
| ENSMUSG00000010663  | Fads1         | -0.36 | 0.01 | 0.04 | 0.06  | 0.68 | 1.00   | -0.04 | 0.77 | 1.00 | fatty acid desaturase 1 [Source:MGJ SymbolAcc:MGJ:1923517]                                                             |
| ENSMUSG000000081752 | Gm14680       | -0.96 | 0.01 | 0.04 | 0.24  | 0.52 | 1.00   | -0.07 | 0.92 | 1.00 | predicted gene 14680 [Source:MGJ SymbolAcc:MGJ:3705601]                                                                |
| ENSMUSG00000075033  | Npep3         | -0.79 | 0.01 | 0.04 | 0.14  | 0.68 | 1.00   | 0.29  | 0.28 | 1.00 | nucleolar phosphoprotein 3 [Source:MGJ SymbolAcc:MGJ:2686598]                                                          |
| ENSMUSG000000047733 | SNORA72       | -0.74 | 0.01 | 0.04 | 0.49  | 0.23 | 1.00   | -0.03 | 0.37 | 1.00 | Small nuclear RNA SNORA72 [Source:MGJ SymbolAcc:MGJ:1923510]                                                           |
| ENSMUSG000000093772 | 4931403E22Rik | -1.05 | 0.01 | 0.04 | 0.52  | 0.22 | 1.00   | 0.32  | 0.34 | 1.00 | RIKEN cDNA 4931403E22 gene [Source:MGJ SymbolAcc:MGJ:1918192]                                                          |
| ENSMUSG00000042727  | Trpm6         | -1.72 | 0.01 | 0.04 | 0.17  | 1.00 | 1.00   | -0.04 | 1.00 | 1.00 | transient receptor potential cation channel, subfamily M, member 6 [Source:MGJ SymbolAcc:MGJ:2676603]                  |
| ENSMUSG000000022861 | Dgkq          | -1.60 | 0.01 | 0.04 | 1.02  | 0.13 | 0.99   | -0.11 | 1.00 | 1.00 | diacylglycerol kinase, gamma [Source:MGJ SymbolAcc:MGJ:105060]                                                         |
| ENSMUSG000000054455 | Vapb          | -0.36 | 0.01 | 0.04 | 0.24  | 0.06 | 0.56   | 0.04  | 0.80 | 1.00 | solute-associated membrane protein, associated protein B and C [Source:MGJ SymbolAcc:MGJ:1928744]                      |
| ENSMUSG000000038641 | Ccdc148       | -1.54 | 0.01 | 0.04 | 0.28  | 0.82 | 1.00   | 0.05  | 1.00 | 1.00 | coiled-coil domain containing 148 [Source:MGJ SymbolAcc:MGJ:3039583]                                                   |
| ENSMUSG00000027523  | Gnas          | -0.50 | 0.01 | 0.04 | 0.05  | 0.39 | 1.00   | -0.04 | 0.63 | 1.00 | GNAS (guanine nucleotide binding protein, alpha stimulating) complex locus [Source:MGJ SymbolAcc:MGJ:95777]            |
| ENSMUSG000000097291 | Hbbp          | -0.43 | 0.01 | 0.04 | 0.34  | 0.02 | 0.23   | 0.07  | 0.71 | 1.00 | Hepatitis B virus X interacting protein [Source:MGJ SymbolAcc:MGJ:1915826]                                             |
| ENSMUSG000000033624 | Pdpr          | -0.56 | 0.01 | 0.04 | 0.38  | 0.06 | 0.60   | 0.13  | 0.52 | 1.00 | pyruvate dehydrogenase phosphatase regulatory subunit [Source:MGJ SymbolAcc:MGJ:2442188]                               |
| ENSMUSG00000022790  | Igfbp1        | -0.44 | 0.01 | 0.04 | 0.38  | 0.01 | 0.18   | -0.24 | 0.16 | 1.00 | immunoglobulin superfamily, member 11 [Source:MGJ SymbolAcc:MGJ:2388477]                                               |
| ENSMUSG000000064917 | sno239        | -0.61 | 0.01 | 0.04 | 0.37  | 0.10 | 0.83   | 0.13  | 0.57 | 1.00 | Small nuclear RNA Z39 [Source:MGJ SymbolAcc:MGJ:300341]                                                                |
| ENSMUSG000000066832 | Pgk1-1st      | -0.27 | 0.01 | 0.04 | 0.20  | 0.02 | 0.24   | 0.19  | 0.07 | 1.00 | phosphoglycerate kinase-1, related sequence-7 [Source:MGJ SymbolAcc:MGJ:97562]                                         |
| ENSMUSG000000085793 | Lin5          | -0.87 | 0.01 | 0.04 | 0.50  | 0.15 | 1.00   | 0.08  | 0.85 | 1.00 | lin-5 homolog (C. elegans) [Source:MGJ SymbolAcc:MGJ:3045391]                                                          |
| ENSMUSG000000001151 | Pfnc1         | -0.69 | 0.01 | 0.04 | 0.59  | 0.02 | 0.23   | -0.03 | 1.00 | 1.00 | pericentriolar (Ndc80) [Source:MGJ SymbolAcc:MGJ:107222]                                                               |
| ENSMUSG000000048292 | Adsp2         | -0.38 | 0.01 | 0.04 | 0.13  | 0.02 | 0.29   | 0.06  | 0.69 | 1.00 | myc binding protein 2 [Source:MGJ SymbolAcc:MGJ:2179432]                                                               |
| ENSMUSG000000019763 | Rmnd1         | -0.46 | 0.01 | 0.04 | 0.28  | 0.11 | 0.85   | -0.03 | 0.92 | 1.00 | required for meiotic nuclear division 1 homolog (S. cerevisiae) [Source:MGJ SymbolAcc:MGJ:1913334]                     |
| ENSMUSG00000048442  | 2210020M01Rik | -1.11 | 0.01 | 0.04 | 0.43  | 0.38 | 1.00   | -0.02 | 1.00 | 1.00 | RIKEN cDNA 2210020M01 gene [Source:MGJ SymbolAcc:MGJ:1913778]                                                          |
| ENSMUSG00000042662  | Dusp15        | -1.11 | 0.01 | 0.04 | 0.14  | 0.88 | 1.00</ |       |      |      |                                                                                                                        |

Sup. Table 1 SET VI

| ENSEMBL             | Symbol         | CP versus Sal | CP versus CP+DCA | DCA versus Sal | FDR    | logFC | Pvalue | DCA Desc                                                                                                                     |
|---------------------|----------------|---------------|------------------|----------------|--------|-------|--------|------------------------------------------------------------------------------------------------------------------------------|
| ENSMUSG000000027199 | Gatm           | -3.71         | 0.00             | 0.64           | 0.00   | 0.18  | 0.11   | 1.00 glycine amidinotransferase (L-arginine:glycine amidinotransferase) [Source:MGI Symbol;Acc:MGI:1914342]                  |
| ENSMUSG000000012490 | Sic34a1        | -2.11         | 0.00             | 0.79           | 0.00   | -0.14 | 0.05   | 1.00 solute carrier family 34 (sodium phosphate), member 1 [Source:MGI Symbol;Acc:MGI:1345284]                               |
| ENSMUSG000000028713 | Cyp4b1         | -1.69         | 0.00             | 0.68           | 0.00   | -0.03 | 0.70   | 1.00 cytochrome P450, family 4, subfamily b, polypeptide 1 [Source:MGI Symbol;Acc:MGI:103225]                                |
| ENSMUSG000000059880 | Drase1         | -3.12         | 0.00             | 0.11           | 0.00   | -0.05 | 0.75   | 1.00 deoxyribonuclease I [Source:MGI Symbol;Acc:MGI:103157]                                                                  |
| ENSMUSG000000022186 | Oxct1          | -1.54         | 0.00             | 0.56           | 0.00   | 0.01  | 0.82   | 1.00 3-oxoacid CoA transferase 1 [Source:MGI Symbol;Acc:MGI:1914291]                                                         |
| ENSMUSG000000024892 | Pcx            | -2.45         | 0.00             | 0.73           | 0.00   | 0.34  | 0.00   | 0.14 pyruvate carboxylase [Source:MGI Symbol;Acc:MGI:97520]                                                                  |
| ENSMUSG000000025479 | Cyp2e1         | -2.51         | 0.00             | 0.62           | 0.00   | -0.29 | 0.05   | 1.00 cytochrome P450, family 2, subfamily e, polypeptide 1 [Source:MGI Symbol;Acc:MGI:88607]                                 |
| ENSMUSG000000031441 | Afp11a         | -2.25         | 0.00             | 0.85           | 0.00   | 0.36  | 0.00   | 0.00 ATPase, class VI, type 11A [Source:MGI Symbol;Acc:MGI:1354735]                                                          |
| ENSMUSG000000024966 | Afp1           | -2.41         | 0.00             | 0.77           | 0.00   | 0.20  | 0.02   | 1.00 aspartate aminocyclase 3 [Source:MGI Symbol;Acc:MGI:1918920]                                                            |
| ENSMUSG000000049790 | Gm15879        | -3.11         | 0.00             | 0.08           | 0.00   | -0.05 | 0.74   | 1.00 predicted gene 15879 [Source:MGI Symbol;Acc:MGI:3802012]                                                                |
| ENSMUSG000000020051 | Pah            | -1.71         | 0.00             | 0.76           | 0.00   | -0.03 | 0.74   | 1.00 phenylalanine hydroxylase [Source:MGI Symbol;Acc:MGI:97473]                                                             |
| ENSMUSG000000097458 | ALB31764.1     | -2.26         | 0.00             | 0.07           | 0.00   | 0.01  | 0.90   | 1.00 0                                                                                                                       |
| ENSMUSG000000076441 | Asa1           | -2.16         | 0.00             | 0.98           | 0.00   | -0.18 | 0.03   | 1.00 argininosuccinate synthetase 1 [Source:MGI Symbol;Acc:MGI:88090]                                                        |
| ENSMUSG000000022813 | Mixx           | -2.39         | 0.00             | 0.56           | 0.00   | -0.14 | 0.21   | 1.00 myo-inositol oxygenase [Source:MGI Symbol;Acc:MGI:1891725]                                                              |
| ENSMUSG000000049152 | Ugr3a2         | -1.65         | 0.00             | 0.51           | 0.00   | -0.08 | 0.30   | 1.00 UDP glycosyltransferase 3 family, polypeptide A2 [Source:MGI Symbol;Acc:MGI:2145969]                                    |
| ENSMUSG000000020204 | Napsa          | -1.22         | 0.00             | 0.26           | 0.00   | -0.21 | 0.00   | 0.73 napsin A aspartic peptidase [Source:MGI Symbol;Acc:MGI:109365]                                                          |
| ENSMUSG000000031766 | Sic12a3        | -2.76         | 0.00             | 0.44           | 0.04   | 0.03  | 0.66   | 1.00 solute carrier family 12, member 3 [Source:MGI Symbol;Acc:MGI:108114]                                                   |
| ENSMUSG000000025262 | Sic2a20        | -2.88         | 0.00             | 1.23           | 0.00   | 0.20  | 0.08   | 1.00 solute carrier family 22, member 30 [Source:MGI Symbol;Acc:MGI:2442750]                                                 |
| ENSMUSG000000046887 | Gm15428        | -2.17         | 0.00             | 1.00           | 0.00   | -0.20 | 0.04   | 1.00 predicted gene 15424 [Source:MGI Symbol;Acc:MGI:3643173]                                                                |
| ENSMUSG000000036590 | U222228        | -2.90         | 0.00             | 0.56           | 0.00   | -0.20 | 0.34   | 1.00 solute carrier family 22, member 28 [Source:MGI Symbol;Acc:MGI:3645714]                                                 |
| ENSMUSG000000027227 | Sord           | -1.88         | 0.00             | 0.86           | 0.00   | 0.07  | 0.43   | 1.00 sorbitol dehydrogenase [Source:MGI Symbol;Acc:MGI:98266]                                                                |
| ENSMUSG000000061838 | Sudg2          | -1.75         | 0.00             | 0.49           | 0.00   | -0.22 | 0.01   | 1.00 succinate-Coenzyme A ligase, GDP-forming, beta subunit [Source:MGI Symbol;Acc:MGI:1306824]                              |
| ENSMUSG000000035878 | Aghp1b         | -2.17         | 0.00             | 1.09           | 0.00   | 0.07  | 0.51   | 1.00 aminoglycoside phosphotransferase domain containing 1 [Source:MGI Symbol;Acc:MGI:2443139]                               |
| ENSMUSG000000030477 | Inmt1          | -2.27         | 0.00             | 0.60           | 0.00   | -0.13 | 0.33   | 1.00 indolethylamine N-methyltransferase [Source:MGI Symbol;Acc:MGI:102963]                                                  |
| ENSMUSG000000032473 | Afp11b         | -2.74         | 0.00             | 0.74           | 0.00   | 0.20  | 0.01   | 1.00 meprin 1 beta [Source:MGI Symbol;Acc:MGI:96464]                                                                         |
| ENSMUSG000000033610 | Pank1          | -2.00         | 0.00             | 0.95           | 0.00   | 0.15  | 0.19   | 1.00 pantothanate kinase 1 [Source:MGI Symbol;Acc:MGI:1922985]                                                               |
| ENSMUSG000000033533 | Acsm1          | -1.63         | 0.00             | 0.57           | 0.00   | -0.04 | 0.65   | 1.00 acyl-CoA synthetase medium-chain family member 1 [Source:MGI Symbol;Acc:MGI:2152200]                                    |
| ENSMUSG000000032047 | Acat1          | -1.74         | 0.00             | 0.60           | 0.00   | -0.04 | 0.58   | 1.00 acyl-Coenzyme A acetyltransferase 1 [Source:MGI Symbol;Acc:MGI:87870]                                                   |
| ENSMUSG000000022679 | Mpv17          | -1.81         | 0.00             | 0.71           | 0.00   | 0.38  | 0.00   | 0.10 Mpv17 transgene, kidney disease mutant-like [Source:MGI Symbol;Acc:MGI:2135951]                                         |
| ENSMUSG000000054733 | Msr3           | -1.98         | 0.00             | 0.86           | 0.00   | -0.08 | 0.50   | 1.00 methionine sulfide reductase A [Source:MGI Symbol;Acc:MGI:106916]                                                       |
| ENSMUSG000000033122 | 06110012H03Rrk | -2.51         | 0.00             | 0.52           | 0.00   | 0.35  | 0.02   | 0.25 RIKEN cDNA 06110012H03 gene [Source:MGI Symbol;Acc:MGI:1921338]                                                         |
| ENSMUSG000000030935 | Acsm3          | -2.94         | 0.00             | 0.96           | 0.00   | -0.89 | 0.00   | 0.00 acyl-CoA synthetase medium-chain family member 3 [Source:MGI Symbol;Acc:MGI:99538]                                      |
| ENSMUSG000000030945 | Acsm2          | -1.74         | 0.00             | 0.68           | 0.00   | 0.08  | 0.36   | 1.00 acyl-CoA synthetase medium-chain family member 2 [Source:MGI Symbol;Acc:MGI:2385289]                                    |
| ENSMUSG000000058997 | Vwa8           | -2.23         | 0.00             | 0.74           | 0.00   | -0.17 | 0.10   | 1.00 von Willebrand factor A domain containing 8 [Source:MGI Symbol;Acc:MGI:1919008]                                         |
| ENSMUSG000000032373 | Car12          | -1.66         | 0.00             | 1.59           | 0.00   | -0.07 | 0.46   | 1.00 carbonic anhydrase 12 [Source:MGI Symbol;Acc:MGI:1923709]                                                               |
| ENSMUSG000000032761 | Afp1           | -2.89         | 0.00             | 0.84           | 0.00   | -0.12 | 0.58   | 1.00 cubilin (retinotic factor) cubilin receptor [Source:MGI Symbol;Acc:MGI:1931256]                                         |
| ENSMUSG000000039197 | Adk            | -2.90         | 0.00             | 0.48           | 0.00   | 0.03  | 0.84   | 1.00 adenosine kinase [Source:MGI Symbol;Acc:MGI:87930]                                                                      |
| ENSMUSG000000025698 | Tln2           | -2.24         | 0.00             | 0.82           | 0.00   | -0.09 | 0.47   | 1.00 talin 2 [Source:MGI Symbol;Acc:MGI:1917799]                                                                             |
| ENSMUSG000000072664 | Ugr3a1         | -1.83         | 0.00             | 0.85           | 0.00   | -0.31 | 0.00   | 0.54 UDP glycosyltransferase 3 family, polypeptide A1 [Source:MGI Symbol;Acc:MGI:2146055]                                    |
| ENSMUSG000000058914 | C1qtnf3        | -2.81         | 0.00             | 1.07           | 0.00   | -0.04 | 0.79   | 1.00 C1q and tumor necrosis factor related protein 3 [Source:MGI Symbol;Acc:MGI:1932136]                                     |
| ENSMUSG000000022244 | Amarc1         | -1.97         | 0.00             | 0.81           | 0.00   | 0.37  | 0.02   | 0.29 alpha-methylacyl-CoA racemase [Source:MGI Symbol;Acc:MGI:1098273]                                                       |
| ENSMUSG000000033512 | 06110012H03Rrk | -2.51         | 0.00             | 0.50           | 0.00   | 0.17  | 0.02   | 1.00 4-aminobutyrate aminotransferase [Source:MGI Symbol;Acc:MGI:2443582]                                                    |
| ENSMUSG000000055373 | Fu9            | -2.03         | 0.00             | 1.09           | 0.00   | 0.04  | 0.65   | 1.00 fucosyltransferase 9 [Source:MGI Symbol;Acc:MGI:1330859]                                                                |
| ENSMUSG000000069805 | Fbp1           | -1.90         | 0.00             | 0.92           | 0.00   | 0.05  | 0.62   | 1.00 fructose biphosphatase 1 [Source:MGI Symbol;Acc:MGI:95492]                                                              |
| ENSMUSG000000027359 | Sic27a2        | -2.31         | 0.00             | 1.13           | 0.00   | 0.04  | 0.64   | 1.00 solute carrier family 27 (fatty acid transporter), member 2 [Source:MGI Symbol;Acc:MGI:1347099]                         |
| ENSMUSG000000038072 | Galn11         | -2.40         | 0.00             | 1.04           | 0.00   | 0.14  | 0.25   | 1.00 UDP-N-acetyl-alpha-D-galactosamine polypeptide N-acetylgalactosaminyltransferase 11 [Source:MGI Symbol;Acc:MGI:2444327] |
| ENSMUSG000000020072 | Afp11b         | -2.07         | 0.00             | 1.07           | 0.00   | -0.11 | 0.33   | 1.00 phenazine biosynthesis-like protein domain containing 1 [Source:MGI Symbol;Acc:MGI:1915621]                             |
| ENSMUSG000000021207 | Akr1c21        | -1.76         | 0.00             | 0.80           | 0.00   | -0.20 | 0.03   | 1.00 aldo-keto reductase family 1, member C21 [Source:MGI Symbol;Acc:MGI:1924587]                                            |
| ENSMUSG000000031294 | D630029K05Rrk  | -2.25         | 0.00             | 1.34           | 0.00   | 0.02  | 0.84   | 1.00 RIKEN cDNA D630029K05 gene [Source:MGI Symbol;Acc:MGI:2143561]                                                          |
| ENSMUSG000000039438 | Ttc3c          | -2.04         | 0.00             | 1.14           | 0.00   | 0.24  | 0.02   | 1.00 tetraoctapeptide repeat domain 36 [Source:MGI Symbol;Acc:MGI:2384760]                                                   |
| ENSMUSG000000019459 | Sic13a3        | -2.08         | 0.00             | 0.97           | 0.00   | -0.20 | 0.08   | 1.00 solute carrier family 13 (sodium-dependent dicarboxylate transporter), member 3 [Source:MGI Symbol;Acc:MGI:2149635]     |
| ENSMUSG000000004152 | Sic7a13        | -1.89         | 0.00             | 0.60           | 0.00   | 0.11  | 0.27   | 1.00 solute carrier family 7, cationic amino acid transporter, +/- system member 13 [Source:MGI Symbol;Acc:MGI:1921337]      |
| ENSMUSG000000039290 | Ih2f1          | -1.88         | 0.00             | 0.50           | 0.00   | 0.17  | 0.07   | 1.00 isocitrate dehydrogenase 2 (NADP+) mitochondrial [Source:MGI Symbol;Acc:MGI:96414]                                      |
| ENSMUSG000000020602 | Sic5a8         | -1.88         | 0.00             | 0.73           | 0.00   | 0.28  | 0.01   | 1.00 solute carrier family 5 (iodide transporter), member 8 [Source:MGI Symbol;Acc:MGI:2384916]                              |
| ENSMUSG000000058488 | Kl             | -1.43         | 0.00             | 0.68           | 0.00   | 0.01  | 0.95   | 1.00 klotho [Source:MGI Symbol;Acc:MGI:1101771]                                                                              |
| ENSMUSG000000068205 | Macrod2        | -2.48         | 0.00             | 0.89           | 0.00   | 0.11  | 0.35   | 1.00 MACRO domain containing 2 [Source:MGI Symbol;Acc:MGI:1920149]                                                           |
| ENSMUSG000000038745 | Nirp6          | -2.24         | 0.00             | 1.22           | 0.00   | -0.06 | 0.57   | 1.00 NLR family, pyrin domain containing 6 [Source:MGI Symbol;Acc:MGI:2141990]                                               |
| ENSMUSG000000057880 | Ahd4f1         | -1.58         | 0.00             | 0.69           | 0.00   | 0.26  | 0.01   | 1.00 protein dehydrogenase, iron containing 1 [Source:MGI Symbol;Acc:MGI:1923437]                                            |
| ENSMUSG000000027070 | Lrp2           | -1.96         | 0.00             | 0.98           | 0.00   | -0.11 | 0.32   | 1.00 low density lipoprotein receptor-related protein 2 [Source:MGI Symbol;Acc:MGI:95794]                                    |
| ENSMUSG000000057425 | Ugr2b37        | -2.13         | 0.00             | 0.93           | 0.00   | 0.33  | 0.00   | 0.78 UDP glucuronosyltransferase 2 family, polypeptide B37 [Source:MGI Symbol;Acc:MGI:2148239]                               |
| ENSMUSG000000072941 | Sox3           | -1.51         | 0.00             | 0.79           | 0.00   | 0.08  | 0.35   | 1.00 superoxide dismutase 3, extracellular [Source:MGI Symbol;Acc:MGI:103181]                                                |
| ENSMUSG000000031517 | Gpm6a          | -2.59         | 0.00             | 1.24           | 0.00   | 0.26  | 0.03   | 1.00 glycoprotein m6a [Source:MGI Symbol;Acc:MGI:107671]                                                                     |
| ENSMUSG000000037098 | Rab11Tfp3      | -1.35         | 0.00             | 0.71           | 0.00   | -0.14 | 0.11   | 1.00 RAB11 family interacting protein 3 (class II) [Source:MGI Symbol;Acc:MGI:2444431]                                       |
| ENSMUSG000000020072 | Afp11b         | -2.07         | 0.00             | 1.07           | 0.00   | -0.11 | 0.33   | 1.00 phenazine biosynthesis-like protein domain containing 1 [Source:MGI Symbol;Acc:MGI:1915621]                             |
| ENSMUSG000000070348 | Cnd1f1         | -1.72         | 0.00             | 0.58           | 0.00   | -0.44 | 0.00   | 0.03 cyclin D1 [Source:MGI Symbol;Acc:MGI:88313]                                                                             |
| ENSMUSG000000023914 | Mep1a          | -0.91         | 0.00             | 0.23           | 0.00   | -0.14 | 0.01   | 1.00 meprin 1 alpha [Source:MGI Symbol;Acc:MGI:96963]                                                                        |
| ENSMUSG000000006342 | Sus2           | -1.77         | 0.00             | 0.65           | 0.00   | -0.27 | 0.01   | 1.00 sushi domain containing 2 [Source:MGI Symbol;Acc:MGI:1918983]                                                           |
| ENSMUSG000000025937 | Lactb2         | -1.55         | 0.00             | 0.76           | 0.00   | 0.20  | 0.03   | 1.00 lactamase, beta 2 [Source:MGI Symbol;Acc:MGI:2442551]                                                                   |
| ENSMUSG000000021312 | Afp11b         | -2.06         | 0.00             | 1.21           | 0.00   | 0.34  | 0.02   | 0.29 phosphoenolpyruvate carboxykinase 1, cytosolic [Source:MGI Symbol;Acc:MGI:97501]                                        |
| ENSMUSG000000055737 | Ghr            | -2.00         | 0.00             | 1.22           | 0.00   | -0.18 | 0.01   | 1.00 growth hormone receptor [Source:MGI Symbol;Acc:MGI:95708]                                                               |
| ENSMUSG000000028766 | Alpl           | -1.77         | 0.00             | 0.62           | 0.00   | 0.34  | 0.00   | 0.43 alkaline phosphatase, liver/bone/kidney [Source:MGI Symbol;Acc:MGI:87938]                                               |
| ENSMUSG000000079262 | Sico1a6        | -1.93         | 0.00             | 0.74           | 0.00   | 0.03  | 0.77   | 1.00 solute carrier anion transporter family, member 1a6 [Source:MGI Symbol;Acc:MGI:1351906]                                 |
| ENSMUSG000000005612 | Cndp1          | -1.32         | 0.00             | 1.22           | 0.00   | -0.15 | 0.34   | 1.00 carnosine dipeptidase 1 (metallopeptidase M20 family) [Source:MGI Symbol;Acc:MGI:2451097]                               |
| ENSMUSG000000015568 | Lpl            | -1.95         | 0.00             | 0.40           | 0.00   | 0.16  | 0.24   | 1.00 lipoprotein lipase [Source:MGI Symbol;Acc:MGI:96820]                                                                    |
| ENSMUSG000000049465 | Hpr2           | -1.67         | 0.00             | 0.63           | 0.00   | 0.23  | 0.13   | 1.00 alpha-1,3-galactosyltransferase 1 [Source:MGI Symbol;Acc:MGI:87913]                                                     |
| ENSMUSG000000054630 | Ugr2b25        | -2.25         | 0.00             | 1.00           | 0.00   | 0.50  | 0.00   | 0.14 UDP glucuronosyltransferase 2 family, polypeptide B5 [Source:MGI Symbol;Acc:MGI:98900]                                  |
| ENSMUSG000000046598 | Bdh1           | -1.70         | 0.00             | 0.58           | 0.00   | 0.10  | 0.32   | 1.00 3-hydroxybutyrate dehydrogenase, type 1 [Source:MGI Symbol;Acc:MGI:1919161]                                             |
| ENSMUSG000000061906 | Ugr2b38        | -2.33         | 0.00             | 1.03           | 0.00   | 0.42  | 0.00   | 0.73 UDP glucuronosyltransferase 2 family, polypeptide B38 [Source:MGI Symbol;Acc:MGI:2140794]                               |
| ENSMUSG000000029735 | Tpk1           | -2.99         | 0.00             | 1.02           | 0.00   | 0.09  | 0.56   | 1.00 thiamine pyrophosphokinase [Source:MGI Symbol;Acc:MGI:1352500]                                                          |
| ENSMUSG000000056487 | Gm15824        | -2.21         | 0.00             | 1.42           | 0.00   | 0.13  | 0.23   | 1.00 predicted gene 15824 [Source:MGI Symbol;Acc:MGI:3650152]                                                                |
| ENSMUSG000000037866 | Asp1           | -3.06         | 0.00             | 1.35           | 0.00   | -0.04 | 0.82   | 1.00 asparaginase homolog (S. cerevisiae) [Source:MGI Symbol;Acc:MGI:2144822]                                                |
| ENSMUSG000000025790 | Sico3a1        | -2.38         | 0.00             | 1.07           | 0.00   | 0.21  | 0.07   | 1.00 solute carrier anion transporter family, member 3a1 [Source:MGI Symbol;Acc:MGI:1351867]                                 |
| ENSMUSG000000027332 | Ivd            | -1.37         | 0.00             | 0.49           | 0.00   | -0.07 | 0.47   | 1.00 isovaleryl coenzyme A dehydrogenase [Source:MGI Symbol;Acc:MGI:1929242]                                                 |
| ENSMUSG000000029998 | Acp3           | -1.73         | 0.00             | 0.64           | 0.00   | 0.01  | 0.95   | 1.00 acyl-Coenzyme A oxidase 3, pristanoyl [Source:MGI Symbol;Acc:MGI:1933156]                                               |
| ENSMUSG000000056487 | Mel17a2        | -1.13         | 0.00             | 0.77           | 0.00   | 0.07  | 0.44   | 1.00 methyltransferase like 7a2 [Source:MGI Symbol;Acc:MGI:3026615]                                                          |
| ENSMUSG000000037866 | Ahd4f1         | -1.58         | 0.00             | 0.55           | 0.00   | 0.26  | 0.59   | 1.00 aldolase dehydrogenase 4 family, member 4 [Source:MGI Symbol;Acc:MGI:2443883]                                           |
| ENSMUSG000000059802 | Syn3           | -1.35         | 0.00             | 0.58           | 0.00   | 0.00  | 0.97   | 1.00 synapsin III [Source:MGI Symbol;Acc:MGI:1351334]                                                                        |
| ENSMUSG000000052505 | Cyp2e5         | -1.49         | 0.00             | 0.56           | 0.00   | -0.03 | 0.71   | 1.00 cytochrome P450, family 2, subfamily j, polypeptide 5 [Source:MGI Symbol;Acc:MGI:1270149]                               |
| ENSMUSG000000046082 | Tmem174        | -1.38         | 0.00             | 0.74           | 0.00   | 0.10  | 0.32   | 1.00 transmembrane protein 174 [Source:MGI Symbol;Acc:MGI:1915594]                                                           |
| ENSMUSG000000025792 | Sic25a10       | -1.46         | 0.00             | 1.00           | 0.00</ |       |        |                                                                                                                              |



|                    |              |       |      |      |      |      |      |       |      |      |                                                                                                                                     |
|--------------------|--------------|-------|------|------|------|------|------|-------|------|------|-------------------------------------------------------------------------------------------------------------------------------------|
| ENSMUSG0000060961  | Slc44a4      | -1.56 | 0.00 | 0.00 | 1.12 | 0.00 | 0.00 | 0.10  | 0.27 | 1.00 | solute carrier family 4 (anion exchanger), member 4 [Source:MGI Symbol;Acc:MGI:1927555]                                             |
| ENSMUSG000004655   | Agp1         | -0.71 | 0.00 | 0.00 | 0.33 | 0.00 | 0.00 | -0.13 | 0.08 | 1.00 | aquaporin 1 [Source:MGI Symbol;Acc:MGI:103201]                                                                                      |
| ENSMUSG0000061959  | Ces1e        | -2.29 | 0.00 | 0.00 | 0.77 | 0.00 | 0.01 | -0.14 | 0.37 | 1.00 | carboxylesterase 1E [Source:MGI Symbol;Acc:MGI:95432]                                                                               |
| ENSMUSG000000345   | Hdh3a        | -1.21 | 0.00 | 0.00 | 0.53 | 0.00 | 0.00 | 0.03  | 0.03 | 3.00 | 3-hydroxyisobutyrate 3-hydrogenase [Source:MGI Symbol;Acc:MGI:1889802]                                                              |
| ENSMUSG000002464   | Cy6b         | -1.06 | 0.00 | 0.00 | 0.28 | 0.00 | 0.00 | 0.00  | 1.00 | 1.00 | cytochrome b-5 [Source:MGI Symbol;Acc:MGI:1926952]                                                                                  |
| ENSMUSG0000038967  | Pdk2         | -1.39 | 0.00 | 0.00 | 0.76 | 0.00 | 0.00 | -0.09 | 0.42 | 1.00 | pyruvate dehydrogenase kinase, isoenzyme 2 [Source:MGI Symbol;Acc:MGI:1343087]                                                      |
| ENSMUSG0000022261  | Sdc2         | -1.79 | 0.00 | 0.00 | 0.66 | 0.00 | 0.00 | 0.06  | 0.60 | 1.00 | slycane2 [Source:MGI Symbol;Acc:MGI:1349165]                                                                                        |
| ENSMUSG0000020321  | Mdh1         | -0.79 | 0.00 | 0.00 | 0.29 | 0.00 | 0.00 | 0.08  | 0.23 | 1.00 | malate dehydrogenase 1, NAD (soluble) [Source:MGI Symbol;Acc:MGI:97051]                                                             |
| ENSMUSG0000000774  | Hdh3a        | -1.24 | 0.00 | 0.00 | 0.53 | 0.00 | 0.00 | 0.03  | 0.03 | 3.00 | 3-hydroxyisobutyrate 3-hydrogenase [Source:MGI Symbol;Acc:MGI:1917914]                                                              |
| ENSMUSG0000022389  | Tef          | -1.25 | 0.00 | 0.00 | 0.77 | 0.00 | 0.00 | 0.19  | 0.12 | 1.00 | thyrotroph embryonic factor [Source:MGI Symbol;Acc:MGI:98663]                                                                       |
| ENSMUSG0000019889  | Ptprk        | -2.03 | 0.00 | 0.00 | 1.28 | 0.00 | 0.00 | -0.17 | 0.22 | 1.00 | protein tyrosine phosphatase, receptor type, K [Source:MGI Symbol;Acc:MGI:103310]                                                   |
| ENSMUSG0000033653  | Vps8         | -2.85 | 0.00 | 0.00 | 0.97 | 0.00 | 0.05 | 0.18  | 0.30 | 1.00 | vacuolar protein sorting 8 homolog (S. cerevisiae) [Source:MGI Symbol;Acc:MGI:2146407]                                              |
| ENSMUSG0000029456  | Acad10       | -1.58 | 0.00 | 0.00 | 0.59 | 0.00 | 0.00 | -0.11 | 0.38 | 1.00 | acyl-Coenzyme A dehydrogenase family, member 10 [Source:MGI Symbol;Acc:MGI:1919235]                                                 |
| ENSMUSG0000033592  | Denn1f1a     | -2.94 | 0.00 | 0.00 | 1.25 | 0.00 | 0.00 | -0.15 | 0.39 | 1.00 | DENND1-ADD domain containing 1A [Source:MGI Symbol;Acc:MGI:2442794]                                                                 |
| ENSMUSG0000002840  | Agps         | -1.59 | 0.00 | 0.00 | 0.43 | 0.00 | 0.00 | 0.02  | 0.01 | 1.00 | aconitase 1 [Source:MGI Symbol;Acc:MGI:87879]                                                                                       |
| ENSMUSG0000020310  | Tmbim6       | -0.78 | 0.00 | 0.00 | 0.29 | 0.00 | 0.00 | -0.08 | 0.32 | 1.00 | transmembrane BAX inhibitor motif containing 6 [Source:MGI Symbol;Acc:MGI:99682]                                                    |
| ENSMUSG0000041757  | Plekha6      | -1.28 | 0.00 | 0.00 | 0.53 | 0.00 | 0.00 | -0.20 | 0.04 | 1.00 | pleckstrin homology domain containing, family A member 6 [Source:MGI Symbol;Acc:MGI:2388662]                                        |
| ENSMUSG0000003177  | Herpud1      | -1.36 | 0.00 | 0.00 | 0.98 | 0.00 | 0.00 | 0.10  | 0.43 | 1.00 | homocysteine-inducible, endoplasmic reticulum stress-inducible, ubiquitin-like domain member 1 [Source:MGI Symbol;Acc:MGI:1927406]  |
| ENSMUSG0000008546  | Gm15347      | -2.26 | 0.00 | 0.00 | 0.80 | 0.00 | 0.00 | 0.35  | 0.02 | 1.00 | predicted gene 15347 [Source:MGI Symbol;Acc:MGI:3705310]                                                                            |
| ENSMUSG0000002410  | Agps         | -1.32 | 0.00 | 0.00 | 0.36 | 0.00 | 0.01 | 0.54  | 0.00 | 0.00 | alkylglycerone phosphate synthase [Source:MGI Symbol;Acc:MGI:2443065]                                                               |
| ENSMUSG0000006806  | Cyp29        | -1.59 | 0.00 | 0.00 | 0.42 | 0.00 | 0.02 | -0.52 | 0.00 | 0.15 | cytochrome P450, family 2, subfamily d, polypeptide 9 [Source:MGI Symbol;Acc:MGI:88606]                                             |
| ENSMUSG0000031725  | Ces1f        | -1.19 | 0.00 | 0.00 | 0.50 | 0.00 | 0.00 | 0.08  | 0.39 | 1.00 | carboxylesterase 1F [Source:MGI Symbol;Acc:MGI:2142687]                                                                             |
| ENSMUSG0000002852  | Ak4          | -1.93 | 0.00 | 0.00 | 0.91 | 0.00 | 0.00 | 0.52  | 0.00 | 0.56 | adenylate kinase 4 [Source:MGI Symbol;Acc:MGI:87979]                                                                                |
| ENSMUSG0000031881  | Cdh16        | -0.95 | 0.00 | 0.00 | 0.35 | 0.00 | 0.00 | -0.10 | 0.19 | 1.00 | cadherin 16 [Source:MGI Symbol;Acc:MGI:106671]                                                                                      |
| ENSMUSG0000002619  | Pecr         | -1.44 | 0.00 | 0.00 | 0.69 | 0.00 | 0.00 | -0.04 | 0.76 | 1.00 | peroxisomal trans-2-enoyl-CoA reductase [Source:MGI Symbol;Acc:MGI:2148199]                                                         |
| ENSMUSG0000003676  | Slc13a8      | -1.57 | 0.00 | 0.00 | 0.86 | 0.00 | 0.00 | -0.05 | 0.00 | 1.00 | solute carrier family 22 (organic anion transporter), member 8 [Source:MGI Symbol;Acc:MGI:1336187]                                  |
| ENSMUSG0000002745  | Acas1        | -1.55 | 0.00 | 0.00 | 0.58 | 0.00 | 0.00 | -0.11 | 0.40 | 1.00 | acyl-CoA synthetase short-chain family member 1 [Source:MGI Symbol;Acc:MGI:1915988]                                                 |
| ENSMUSG0000000423  | Slc5a5       | -1.62 | 0.00 | 0.00 | 0.78 | 0.00 | 0.00 | -0.25 | 0.04 | 1.00 | solute carrier family 5 (sodium/glucose cotransporter), member 10 [Source:MGI Symbol;Acc:MGI:1926809]                               |
| ENSMUSG0000006439  | m1-Te        | -1.25 | 0.00 | 0.00 | 0.25 | 0.00 | 0.02 | 0.00  | 1.00 | 1.00 | mitochondrially encoded tRNA glutamic acid [Source:MGI Symbol;Acc:MGI:102488]                                                       |
| ENSMUSG0000009439  | RP23-33415.4 | -1.21 | 0.00 | 0.00 | 0.52 | 0.00 | 0.00 | -0.04 | 0.73 | 1.00 | Uncharacterized protein [Source:UniProtKB/TrEMBL;Acc:J9UJZ1]                                                                        |
| ENSMUSG0000000707  | Ahp1         | -1.34 | 0.00 | 0.00 | 0.49 | 0.00 | 0.00 | 0.04  | 0.00 | 0.24 | alcohol dehydrogenase 1 (class I) [Source:MGI Symbol;Acc:MGI:87921]                                                                 |
| ENSMUSG0000037678  | Chchd3       | -1.73 | 0.00 | 0.00 | 0.81 | 0.00 | 0.00 | 0.08  | 0.51 | 1.00 | collet-col hemolymph protein domain containing 3 [Source:MGI Symbol;Acc:MGI:1913325]                                                |
| ENSMUSG0000008967  | Agx2         | -1.64 | 0.00 | 0.00 | 0.59 | 0.00 | 0.01 | -0.37 | 0.00 | 0.90 | alanine-glyoxylate aminotransferase 2 [Source:MGI Symbol;Acc:MGI:2146052]                                                           |
| ENSMUSG00000010122 | Slc47a1      | -0.88 | 0.00 | 0.00 | 0.53 | 0.00 | 0.00 | 0.01  | 0.96 | 1.00 | solute carrier family 47, member 1 [Source:MGI Symbol;Acc:MGI:1914723]                                                              |
| ENSMUSG0000002392  | Mut          | -1.14 | 0.00 | 0.00 | 0.42 | 0.00 | 0.00 | -0.11 | 0.26 | 1.00 | methylmalonyl-Coenzyme A mutase [Source:MGI Symbol;Acc:MGI:97239]                                                                   |
| ENSMUSG0000007169  | Sru29        | -2.91 | 0.00 | 0.00 | 1.60 | 0.00 | 0.00 | -0.22 | 0.23 | 1.00 | sorting nexin 29 [Source:MGI Symbol;Acc:MGI:1921728]                                                                                |
| ENSMUSG0000003912  | Igpf1        | -1.11 | 0.00 | 0.00 | 0.62 | 0.00 | 0.01 | -0.04 | 0.20 | 1.00 | inositol 1,4,5-trisphosphate receptor 1 [Source:MGI Symbol;Acc:MGI:96623]                                                           |
| ENSMUSG0000002590  | Lyp1a1       | -1.12 | 0.00 | 0.00 | 0.36 | 0.00 | 0.00 | 0.33  | 0.00 | 0.14 | lysophospholipase 1 [Source:MGI Symbol;Acc:MGI:1344588]                                                                             |
| ENSMUSG0000002691  | Pkp4         | -1.16 | 0.00 | 0.00 | 0.59 | 0.00 | 0.00 | 0.11  | 0.24 | 1.00 | plakophilin 4 [Source:MGI Symbol;Acc:MGI:109281]                                                                                    |
| ENSMUSG0000008521  | 0610005C13Rk | -1.69 | 0.00 | 0.00 | 1.20 | 0.00 | 0.00 | 0.03  | 0.81 | 1.00 | RIKEN cDNA 0610005C13 gene [Source:MGI Symbol;Acc:MGI:1918911]                                                                      |
| ENSMUSG0000003579  | Xyfb         | -1.00 | 0.00 | 0.00 | 0.49 | 0.00 | 0.00 | -0.09 | 0.32 | 1.00 | xylulokinase homolog (H. influenzae) [Source:MGI Symbol;Acc:MGI:2142985]                                                            |
| ENSMUSG0000006456  | m1-Nhp6      | -0.70 | 0.00 | 0.00 | 0.58 | 0.00 | 0.00 | 0.16  | 0.00 | 1.00 | mitochondrial NADH dehydrogenase 14 [Source:MGI Symbol;Acc:MGI:102495]                                                              |
| ENSMUSG0000036083  | Slc17a3      | -1.23 | 0.00 | 0.00 | 0.37 | 0.00 | 0.00 | 0.26  | 0.02 | 1.00 | solute carrier family 17 (sodium phosphate), member 3 [Source:MGI Symbol;Acc:MGI:2382916]                                           |
| ENSMUSG0000002634  | Acmsd        | -1.78 | 0.00 | 0.00 | 1.09 | 0.00 | 0.00 | -0.03 | 0.88 | 1.00 | amino carboxymuconate semialdehyde decarboxylase [Source:MGI Symbol;Acc:MGI:2386323]                                                |
| ENSMUSG0000006298  | Acadm        | -1.12 | 0.00 | 0.00 | 0.53 | 0.00 | 0.00 | 0.25  | 0.01 | 1.00 | acyl-Coenzyme A dehydrogenase, medium chain [Source:MGI Symbol;Acc:MGI:87867]                                                       |
| ENSMUSG0000005435  | Acfa         | -1.17 | 0.00 | 0.00 | 0.72 | 0.00 | 0.00 | -0.10 | 0.33 | 1.00 | avian musculoaponeurotic fibrosarcoma (v-maf) AS42 oncogene homolog [Source:MGI Symbol;Acc:MGI:96909]                               |
| ENSMUSG0000000154  | Slc22a18     | -0.87 | 0.00 | 0.00 | 0.42 | 0.00 | 0.00 | -0.12 | 0.16 | 1.00 | solute carrier family 22 (organic cation transporter), member 18 [Source:MGI Symbol;Acc:MGI:1336884]                                |
| ENSMUSG0000003946  | Ptdc1        | -1.24 | 0.00 | 0.00 | 0.58 | 0.00 | 0.00 | 0.16  | 0.00 | 1.00 | ATPase, H <sup>+</sup> transporting, lysosomal D0 subunit A4 [Source:MGI Symbol;Acc:MGI:2153480]                                    |
| ENSMUSG0000002816  | Bdh2         | -1.20 | 0.00 | 0.00 | 0.42 | 0.00 | 0.00 | -0.05 | 0.65 | 1.00 | 3-hydroxybutyrate dehydrogenase, type 2 [Source:MGI Symbol;Acc:MGI:1917022]                                                         |
| ENSMUSG0000002103  | G3t2         | -1.11 | 0.00 | 0.00 | 0.71 | 0.00 | 0.00 | 0.03  | 0.75 | 1.00 | glutathione transferase zeta 1 (maleylacetate isomerase) [Source:MGI Symbol;Acc:MGI:1341859]                                        |
| ENSMUSG00000001095 | Slc13a2      | -2.18 | 0.00 | 0.00 | 1.54 | 0.00 | 0.00 | 0.07  | 0.69 | 1.00 | solute carrier family 13 (sodium-dependent dicarboxylate transporter), member 2 [Source:MGI Symbol;Acc:MGI:1276558]                 |
| ENSMUSG0000000151  | Slc25a13     | -1.75 | 0.00 | 0.00 | 0.94 | 0.00 | 0.00 | 0.00  | 1.00 | 1.00 | solute carrier family 25 (mitochondrial carrier, adenine nucleotide translocator), member 13 [Source:MGI Symbol;Acc:MGI:1354772]    |
| ENSMUSG0000000032  | Hsp68        | -1.00 | 0.00 | 0.00 | 0.58 | 0.00 | 0.00 | 0.16  | 0.03 | 1.00 | chaperone phosphoforase 1 [Source:MGI Symbol;Acc:MGI:2384841]                                                                       |
| ENSMUSG0000008470  | Gm15350      | -2.24 | 0.00 | 0.00 | 0.85 | 0.00 | 0.03 | 0.43  | 0.01 | 1.00 | predicted gene 15350 [Source:MGI Symbol;Acc:MGI:3705181]                                                                            |
| ENSMUSG0000003298  | Pdxk1        | -1.19 | 0.00 | 0.00 | 0.43 | 0.00 | 0.00 | 0.16  | 0.13 | 1.00 | PDZ domain containing 1 [Source:MGI Symbol;Acc:MGI:1928901]                                                                         |
| ENSMUSG0000002819  | Ddah1        | -1.12 | 0.00 | 0.00 | 0.84 | 0.00 | 0.00 | 0.10  | 0.31 | 1.00 | dimethylarginine dimethylaminohydrolase 1 [Source:MGI Symbol;Acc:MGI:1916469]                                                       |
| ENSMUSG0000002247  | Aco2         | -0.85 | 0.00 | 0.00 | 0.44 | 0.00 | 0.00 | 0.14  | 0.05 | 1.00 | aconitase 2, mitochondrial [Source:MGI Symbol;Acc:MGI:87880]                                                                        |
| ENSMUSG0000003627  | Lrrk2        | -1.34 | 0.00 | 0.00 | 0.95 | 0.00 | 0.00 | 0.17  | 0.11 | 1.00 | leucine-rich repeat kinase 2 [Source:MGI Symbol;Acc:MGI:1913975]                                                                    |
| ENSMUSG0000000380  | Pkd2         | -1.00 | 0.00 | 0.00 | 0.62 | 0.00 | 0.01 | -0.04 | 0.00 | 1.00 | cytochrome kidney disease 2 [Source:MGI Symbol;Acc:MGI:1099816]                                                                     |
| ENSMUSG0000002916  | Khk          | -1.09 | 0.00 | 0.00 | 0.68 | 0.00 | 0.00 | 0.00  | 0.59 | 1.00 | ketohekoxinase [Source:MGI Symbol;Acc:MGI:1096353]                                                                                  |
| ENSMUSG0000009012  | Ugt1a7c      | -1.03 | 0.00 | 0.00 | 0.39 | 0.00 | 0.00 | -0.20 | 0.07 | 1.00 | UDP glucuronosyltransferase 1 family, polypeptide A7C [Source:MGI Symbol;Acc:MGI:3032636]                                           |
| ENSMUSG0000002042  | Tcn2         | -0.96 | 0.00 | 0.00 | 0.31 | 0.00 | 0.00 | -0.15 | 0.11 | 1.00 | transcobalamin 2 [Source:MGI Symbol;Acc:MGI:88534]                                                                                  |
| ENSMUSG0000005807  | Melit7a3     | -1.34 | 0.00 | 0.00 | 0.68 | 0.00 | 0.00 | -0.21 | 0.08 | 1.00 | methyltransferase like 7A3 [Source:MGI Symbol;Acc:MGI:3710670]                                                                      |
| ENSMUSG0000002268  | Egr8         | -1.00 | 0.00 | 0.00 | 0.52 | 0.00 | 0.00 | 0.08  | 0.47 | 1.00 | cytochrome A hydralin short chain, 1, mitochondrial [Source:MGI Symbol;Acc:MGI:2136460]                                             |
| ENSMUSG0000002130  | Trk13b       | -1.22 | 0.00 | 0.00 | 0.69 | 0.00 | 0.01 | -0.04 | 0.72 | 1.00 | G-protein-coupled receptor 137B [Source:MGI Symbol;Acc:MGI:1891463]                                                                 |
| ENSMUSG0000009379  | AB099516     | -1.11 | 0.00 | 0.00 | 0.39 | 0.00 | 0.01 | -0.05 | 0.62 | 1.00 | cDNA sequence AB099516 [Source:MGI Symbol;Acc:MGI:3845761]                                                                          |
| ENSMUSG0000008678  | Iso2a2       | -1.61 | 0.00 | 0.00 | 0.60 | 0.00 | 0.01 | -0.34 | 0.01 | 1.00 | isochorismatase domain containing 2a [Source:MGI Symbol;Acc:MGI:3609243]                                                            |
| ENSMUSG00000003526 | Prodh        | -1.20 | 0.00 | 0.00 | 0.73 | 0.00 | 0.00 | -0.20 | 0.09 | 1.00 | proline dehydrogenase [Source:MGI Symbol;Acc:MGI:97770]                                                                             |
| ENSMUSG0000003910  | March6       | -1.14 | 0.00 | 0.00 | 0.51 | 0.00 | 0.00 | -0.12 | 0.24 | 1.00 | membrane-associated ring finger (C3HC1) 6 [Source:MGI Symbol;Acc:MGI:2442773]                                                       |
| ENSMUSG0000000001  | Agp127       | -0.61 | 0.00 | 0.00 | 0.69 | 0.00 | 0.00 | 0.04  | 0.11 | 1.00 | transmembrane protein 127 [Source:MGI Symbol;Acc:MGI:1925233]                                                                       |
| ENSMUSG0000003826  | Bph1         | -1.00 | 0.00 | 0.00 | 0.61 | 0.00 | 0.00 | -0.08 | 0.40 | 1.00 | biphenyl hydrolase-like (serine hydrolase, breast epithelial mucin-associated antigen) [Source:MGI Symbol;Acc:MGI:1915271]          |
| ENSMUSG0000009758  | AC136976.2   | -2.05 | 0.00 | 0.00 | 0.78 | 0.00 | 0.03 | -0.09 | 0.59 | 1.00 | 0                                                                                                                                   |
| ENSMUSG0000002649  | Adck3        | -1.47 | 0.00 | 0.00 | 0.83 | 0.00 | 0.00 | -0.28 | 0.04 | 1.00 | aarF domain containing kinase 3 [Source:MGI Symbol;Acc:MGI:1914676]                                                                 |
| ENSMUSG0000002910  | Lrrap1       | -0.97 | 0.00 | 0.00 | 0.42 | 0.00 | 0.00 | 0.08  | 0.39 | 1.00 | low density lipoprotein receptor-related protein associated protein 1 [Source:MGI Symbol;Acc:MGI:96829]                             |
| ENSMUSG0000000015  | Tmem25       | -1.65 | 0.00 | 0.00 | 0.52 | 0.00 | 0.00 | 0.02  | 0.10 | 1.00 | transmembrane protein 25 [Source:MGI Symbol;Acc:MGI:1918937]                                                                        |
| ENSMUSG0000006607  | Cypl412a     | -2.00 | 0.00 | 0.00 | 0.66 | 0.00 | 0.00 | 0.20  | 0.10 | 1.00 | cytochrome P450, family 4, subfamily A, polypeptide 12a [Source:MGI Symbol;Acc:MGI:88612]                                           |
| ENSMUSG0000000121  | Agpat3       | -1.02 | 0.00 | 0.00 | 0.54 | 0.00 | 0.00 | 0.01  | 0.89 | 1.00 | 1-acylglycerol-3-phosphate O-acyltransferase 3 [Source:MGI Symbol;Acc:MGI:1336186]                                                  |
| ENSMUSG0000002492  | Smarca2      | -1.32 | 0.00 | 0.00 | 0.54 | 0.00 | 0.00 | 0.25  | 0.05 | 1.00 | SWI/SNF related, matrix associated, actin dependent regulator of chromatin, subfamily a, member 2 [Source:MGI Symbol;Acc:MGI:99603] |
| ENSMUSG0000004447  | Asccl1       | -2.01 | 0.00 | 0.00 | 1.13 | 0.00 | 0.00 | 0.05  | 0.79 | 1.00 | activating signal co-receptor 1 complex subunit 1 [Source:MGI Symbol;Acc:MGI:1916340]                                               |
| ENSMUSG0000001743  | Pipox        | -0.94 | 0.00 | 0.00 | 0.51 | 0.00 | 0.00 | -0.04 | 0.71 | 1.00 | peptic acid oxidase [Source:MGI Symbol;Acc:MGI:1197006]                                                                             |
| ENSMUSG0000000012  | Tmem158      | -1.24 | 0.00 | 0.00 | 0.69 | 0.00 | 0.00 | 0.04  | 0.45 | 1.00 | transmembrane protein 158 [Source:MGI Symbol;Acc:MGI:2384572]                                                                       |
| ENSMUSG0000002809  | Cp98         | -1.14 | 0.00 | 0.00 | 0.43 | 0.00 | 0.00 | 0.12  | 0.25 | 1.00 | G-protein-coupled receptor 89 [Source:MGI Symbol;Acc:MGI:1914799]                                                                   |
| ENSMUSG0000001786  | Sgk2         | -1.31 | 0.00 | 0.00 | 0.41 | 0.00 | 0.03 | -0.05 | 0.67 | 1.00 | serum/glucocorticoid regulated kinase 2 [Source:MGI Symbol;Acc:MGI:1351318]                                                         |
| ENSMUSG0000003752  | Aldh8a1      | -1.12 | 0.00 | 0.00 | 0.71 | 0.00 | 0.00 | 0.06  | 0.55 | 1.00 | aldehyde dehydrogenase 8 family, member A1 [Source:MGI Symbol;Acc:MGI:2653900]                                                      |
| ENSMUSG0000004248  | Mga3         | -1.57 | 0.00 | 0.00 | 0.82 | 0.00 | 0.00 | 0.05  | 0.73 | 1.00 | mann                                                                                                                                |

|                     |              |       |      |      |      |      |      |       |      |      |                                                                                                                  |
|---------------------|--------------|-------|------|------|------|------|------|-------|------|------|------------------------------------------------------------------------------------------------------------------|
| ENSMUSG0000020988   | L2hgh        | -0.89 | 0.00 | 0.00 | 0.43 | 0.00 | 0.00 | 0.04  | 0.70 | 1.00 | L-2-hydroxyglutarate dehydrogenase [Source:MGI Symbol:Acc:MGI:2384968]                                           |
| ENSMUSG0000022066   | Etpd4        | -1.14 | 0.00 | 0.00 | 0.41 | 0.00 | 0.04 | 0.16  | 0.18 | 1.00 | ectonucleotide triphosphatase diphosphorylase 4 [Source:MGI Symbol:Acc:MGI:1914714]                              |
| ENSMUSG0000022756   | Pfnk1        | -0.84 | 0.00 | 0.00 | 0.55 | 0.00 | 0.00 | 0.07  | 0.46 | 1.00 | PTEN induced putative kinase 1 [Source:MGI Symbol:Acc:MGI:1916193]                                               |
| ENSMUSG0000022756   | Pfnk1        | -1.11 | 0.00 | 0.00 | 0.55 | 0.00 | 0.00 | 0.07  | 0.46 | 1.00 | PTEN induced putative kinase 1 [Source:MGI Symbol:Acc:MGI:1916193]                                               |
| ENSMUSG0000022235   | Cmb1         | -1.11 | 0.00 | 0.00 | 0.72 | 0.00 | 0.00 | -0.06 | 0.61 | 1.00 | carboxymethylneurite-5-like (Pseudomonas) [Source:MGI Symbol:Acc:MGI:1916824]                                    |
| ENSMUSG0000021509   | Sc25a48      | -2.04 | 0.00 | 0.00 | 1.10 | 0.00 | 0.00 | 0.02  | 0.96 | 1.00 | solute carrier family 25, member 48 [Source:MGI Symbol:Acc:MGI:2145373]                                          |
| ENSMUSG0000036303   | Kk1          | -0.91 | 0.00 | 0.00 | 0.48 | 0.00 | 0.00 | 0.07  | 0.46 | 1.00 | kallikrein 1 [Source:MGI Symbol:Acc:MGI:102850]                                                                  |
| ENSMUSG0000021751   | Ac02         | -1.01 | 0.00 | 0.00 | 0.74 | 0.00 | 0.00 | -0.09 | 0.41 | 1.00 | acyl-Coenzyme A oxidase 2, branched chain [Source:MGI Symbol:Acc:MGI:1934852]                                    |
| ENSMUSG0000022756   | Pfnk1        | -1.35 | 0.00 | 0.00 | 0.43 | 0.00 | 0.00 | 0.12  | 0.00 | 1.00 | phosphatase 11 [Source:MGI Symbol:Acc:MGI:195739]                                                                |
| ENSMUSG0000025968   | Ndufs1       | -0.87 | 0.00 | 0.00 | 0.43 | 0.00 | 0.00 | 0.14  | 0.11 | 1.00 | NADH dehydrogenase (ubiquinone) F6-S protein 1 [Source:MGI Symbol:Acc:MGI:2443241]                               |
| ENSMUSG0000021238   | Aldh6a1      | -0.76 | 0.00 | 0.00 | 0.44 | 0.00 | 0.00 | 0.00  | 0.98 | 1.00 | aldehyde dehydrogenase family 6, subfamily A1 [Source:MGI Symbol:Acc:MGI:1915077]                                |
| ENSMUSG0000027597   | Ahcy         | -0.91 | 0.00 | 0.00 | 0.45 | 0.00 | 0.00 | 0.11  | 0.28 | 1.00 | S-adenosylhomocysteine hydrolase [Source:MGI Symbol:Acc:MGI:87968]                                               |
| ENSMUSG0000031303   | Map3k15      | -0.98 | 0.00 | 0.00 | 0.52 | 0.00 | 0.00 | 0.09  | 0.38 | 1.00 | mitogen-activated protein kinase kinase kinase 15 [Source:MGI Symbol:Acc:MGI:2448588]                            |
| ENSMUSG0000030498   | Gas2         | -1.18 | 0.00 | 0.00 | 0.73 | 0.00 | 0.00 | 0.22  | 0.09 | 1.00 | growth arrest specific 2 [Source:MGI Symbol:Acc:MGI:95657]                                                       |
| ENSMUSG0000030498   | Gas2         | -1.14 | 0.00 | 0.00 | 0.75 | 0.00 | 0.00 | 0.19  | 0.13 | 1.00 | cytochrome P450, family 4, subfamily A, polypeptide 12B [Source:MGI Symbol:Acc:MGI:3611747]                      |
| ENSMUSG0000068874   | Seletp1      | -0.90 | 0.00 | 0.00 | 0.56 | 0.00 | 0.00 | 0.03  | 0.80 | 1.00 | selenium binding protein 1 [Source:MGI Symbol:Acc:MGI:96825]                                                     |
| ENSMUSG0000045226   | Tprkb        | -1.11 | 0.00 | 0.00 | 0.39 | 0.00 | 0.05 | -0.17 | 0.19 | 1.00 | Tp53k1 binding protein [Source:MGI Symbol:Acc:MGI:1917036]                                                       |
| ENSMUSG0000040430   | Pitpnc1      | -1.67 | 0.00 | 0.00 | 0.93 | 0.00 | 0.00 | -0.03 | 0.85 | 1.00 | phosphatidylinositol transfer protein, cytoplasmic 1 [Source:MGI Symbol:Acc:MGI:1919045]                         |
| ENSMUSG0000038775   | Vil1         | -1.55 | 0.00 | 0.00 | 0.71 | 0.00 | 0.01 | -0.07 | 0.72 | 1.00 | villin-like [Source:MGI Symbol:Acc:MGI:1201781]                                                                  |
| ENSMUSG0000034360   | mt-Nd3       | -0.76 | 0.00 | 0.00 | 0.24 | 0.00 | 0.00 | 0.03  | 0.78 | 1.00 | mitochondrially encoded NADH dehydrogenase 3 [Source:MGI Symbol:Acc:MGI:102499]                                  |
| ENSMUSG0000026687   | Aldh1a1      | -0.92 | 0.00 | 0.00 | 0.49 | 0.00 | 0.00 | 0.04  | 0.73 | 1.00 | aldehyde dehydrogenase 9, subfamily A1 [Source:MGI Symbol:Acc:MGI:1861622]                                       |
| ENSMUSG00000089675  | Ugt1a5       | -0.89 | 0.00 | 0.00 | 0.35 | 0.00 | 0.01 | -0.19 | 0.08 | 1.00 | UDP glucuronosyltransferase 1 family, polypeptide A8 [Source:MGI Symbol:Acc:MGI:3576090]                         |
| ENSMUSG00000089675  | Ugt1a5       | -0.89 | 0.00 | 0.00 | 0.35 | 0.00 | 0.01 | -0.19 | 0.08 | 1.00 | UDP glucuronosyltransferase 1 family, polypeptide A5 [Source:MGI Symbol:Acc:MGI:3032634]                         |
| ENSMUSG00000089675  | Ugt1a1       | -0.88 | 0.00 | 0.00 | 0.35 | 0.00 | 0.01 | -0.19 | 0.08 | 1.00 | UDP glucuronosyltransferase 1 family, polypeptide A1 [Source:MGI Symbol:Acc:MGI:98888]                           |
| ENSMUSG0000009175   | Ugt1a9       | -0.89 | 0.00 | 0.00 | 0.35 | 0.00 | 0.01 | -0.19 | 0.08 | 1.00 | UDP glucuronosyltransferase 1 family, polypeptide A9 [Source:MGI Symbol:Acc:MGI:3576092]                         |
| ENSMUSG0000009175   | Ugt1a9       | -1.82 | 0.00 | 0.00 | 0.35 | 0.00 | 0.01 | -0.19 | 0.08 | 1.00 | UDP glucuronosyltransferase 1 family, polypeptide A9 [Source:MGI Symbol:Acc:MGI:3576092]                         |
| ENSMUSG0000009145   | Ugt1fab      | -0.88 | 0.00 | 0.00 | 0.35 | 0.00 | 0.01 | -0.19 | 0.08 | 1.00 | UDP glucuronosyltransferase 1 family, polypeptide A6B [Source:MGI Symbol:Acc:MGI:3580629]                        |
| ENSMUSG00000040351  | Ankik1       | -1.16 | 0.00 | 0.00 | 0.74 | 0.00 | 0.00 | 0.18  | 0.16 | 1.00 | ankyrin repeat and IBR domain containing 1 [Source:MGI Symbol:Acc:MGI:1918047]                                   |
| ENSMUSG0000002949   | Pmp2         | -1.65 | 0.00 | 0.00 | 0.77 | 0.00 | 0.02 | 0.01  | 0.96 | 1.00 | peroxisomal membrane protein 2 [Source:MGI Symbol:Acc:MGI:107487]                                                |
| ENSMUSG0000009175   | Ugt1a2       | -0.86 | 0.00 | 0.00 | 0.34 | 0.00 | 0.01 | -0.19 | 0.08 | 1.00 | UDP glucuronosyltransferase 1 family, polypeptide A2 [Source:MGI Symbol:Acc:MGI:3576049]                         |
| ENSMUSG0000007437   | Prox4737     | -0.93 | 0.00 | 0.00 | 0.46 | 0.00 | 0.00 | 0.09  | 0.45 | 1.00 | predicted gene 4737 [Source:MGI Symbol:Acc:MGI:364347]                                                           |
| ENSMUSG0000037703   | Prox4737     | -0.87 | 0.00 | 0.00 | 0.47 | 0.00 | 0.00 | -0.15 | 0.16 | 1.00 | Prox4737 protein [Source:MGI Symbol:Acc:MGI:265976]                                                              |
| ENSMUSG0000031842   | Pde4c        | -0.94 | 0.00 | 0.00 | 0.67 | 0.00 | 0.00 | 0.13  | 0.23 | 1.00 | phosphodiesterase 4C, cAMP specific [Source:MGI Symbol:Acc:MGI:99556]                                            |
| ENSMUSG0000021779   | Thrb         | -2.58 | 0.00 | 0.00 | 1.62 | 0.00 | 0.00 | 0.13  | 0.54 | 1.00 | thyroid hormone receptor beta [Source:MGI Symbol:Acc:MGI:98743]                                                  |
| ENSMUSG0000040111   | Gramt1b      | -0.97 | 0.00 | 0.00 | 0.83 | 0.00 | 0.00 | -0.09 | 0.35 | 1.00 | GRAM domain containing 1B [Source:MGI Symbol:Acc:MGI:1925037]                                                    |
| ENSMUSG0000006457   | mt-ATP6      | -0.58 | 0.00 | 0.00 | 0.21 | 0.00 | 0.00 | 0.19  | 0.00 | 1.00 | mitochondrially encoded ATP synthase 6 [Source:MGI Symbol:Acc:MGI:99927]                                         |
| ENSMUSG00000030498  | DnaJ1        | -1.20 | 0.00 | 0.00 | 0.59 | 0.00 | 0.01 | 0.23  | 0.18 | 1.00 | Nucleotide exchange factor 1 [Source:MGI Symbol:Acc:MGI:105386]                                                  |
| ENSMUSG00000019996  | Mtap7        | -1.15 | 0.00 | 0.00 | 0.51 | 0.00 | 0.00 | 0.09  | 0.50 | 1.00 | microtubule-associated protein 7 [Source:MGI Symbol:Acc:MGI:1323238]                                             |
| ENSMUSG0000022425   | Enpp2        | -1.11 | 0.00 | 0.00 | 0.89 | 0.00 | 0.00 | 0.21  | 0.04 | 1.00 | ectonucleotide pyrophosphatase/phosphodiesterase 2 [Source:MGI Symbol:Acc:MGI:1321390]                           |
| ENSMUSG00000068877  | Seletp2      | -0.99 | 0.00 | 0.00 | 0.59 | 0.00 | 0.00 | 0.06  | 0.64 | 1.00 | selenium binding protein 2 [Source:MGI Symbol:Acc:MGI:104859]                                                    |
| ENSMUSG00000030160  | Tmem52b      | -1.07 | 0.00 | 0.00 | 0.54 | 0.00 | 0.00 | 0.15  | 0.25 | 1.00 | transmembrane protein 52B [Source:MGI Symbol:Acc:MGI:2442838]                                                    |
| ENSMUSG0000002489   | Blmp1        | -0.69 | 0.00 | 0.00 | 0.83 | 0.00 | 0.01 | 0.00  | 0.45 | 1.00 | brachyury like protein 1 [Source:MGI Symbol:Acc:MGI:104861]                                                      |
| ENSMUSG00000028024  | Enpp1        | -1.05 | 0.00 | 0.00 | 0.57 | 0.00 | 0.00 | 0.14  | 0.25 | 1.00 | glutaryl aminopeptidase [Source:MGI Symbol:Acc:MGI:106645]                                                       |
| ENSMUSG00000054545  | Ugt1a6a      | -0.85 | 0.00 | 0.00 | 0.33 | 0.00 | 0.01 | -0.19 | 0.08 | 1.00 | UDP glucuronosyltransferase 1 family, polypeptide A6A [Source:MGI Symbol:Acc:MGI:2137698]                        |
| ENSMUSG00000032854  | Ugt8a        | -1.13 | 0.00 | 0.00 | 0.58 | 0.00 | 0.00 | 0.37  | 0.02 | 1.00 | UDP galactosyltransferase 8A [Source:MGI Symbol:Acc:MGI:109522]                                                  |
| ENSMUSG00000064354  | mt-Cox2      | -0.41 | 0.00 | 0.00 | 0.14 | 0.00 | 0.01 | 0.17  | 0.00 | 1.00 | mitochondrially encoded cytochrome c oxidase II [Source:MGI Symbol:Acc:MGI:102503]                               |
| ENSMUSG00000053239  | DnaJ19b1e    | -1.03 | 0.00 | 0.00 | 0.44 | 0.00 | 0.01 | -0.03 | 0.80 | 1.00 | DNA segment, Chr 10, Johns Hopkins University 81 expressed [Source:MGI Symbol:Acc:MGI:1351861]                   |
| ENSMUSG00000026576  | Ugt1a1       | -0.70 | 0.00 | 0.00 | 0.35 | 0.00 | 0.00 | 0.19  | 0.00 | 1.00 | ATPase, Na+/K+ transporting, beta 1 polypeptide [Source:MGI Symbol:Acc:MGI:98108]                                |
| ENSMUSG00000064345  | mt-Nd2       | -0.45 | 0.00 | 0.00 | 0.21 | 0.00 | 0.00 | 0.22  | 0.00 | 1.00 | mitochondrially encoded NADH dehydrogenase 2 [Source:MGI Symbol:Acc:MGI:102500]                                  |
| ENSMUSG00000059412  | Fxyd2        | -0.80 | 0.00 | 0.00 | 0.29 | 0.00 | 0.00 | 0.05  | 0.59 | 1.00 | FXYD domain-containing ion transport regulator 2 [Source:MGI Symbol:Acc:MGI:1195260]                             |
| ENSMUSG00000067158  | Col4a4       | -1.07 | 0.00 | 0.00 | 0.74 | 0.00 | 0.00 | 0.06  | 0.66 | 1.00 | collagen, type IV, alpha 4 [Source:MGI Symbol:Acc:MGI:104687]                                                    |
| ENSMUSG00000017718  | Almid        | -1.22 | 0.00 | 0.00 | 0.80 | 0.00 | 0.00 | 0.13  | 0.34 | 1.00 | allylformamide [Source:MGI Symbol:Acc:MGI:2448704]                                                               |
| ENSMUSG0000007437   | D32041H03Rik | -0.94 | 0.00 | 0.00 | 0.45 | 0.00 | 0.00 | -0.22 | 0.06 | 1.00 | Riken cDNA D32041H03 gene [Source:MGI Symbol:Acc:MGI:3603827]                                                    |
| ENSMUSG0000024889   | Papp2        | -0.74 | 0.00 | 0.00 | 0.62 | 0.00 | 0.00 | -0.12 | 0.25 | 1.00 | 3'-phosphoadenosine 5'-phosphosulfate synthase 2 [Source:MGI Symbol:Acc:MGI:1330223]                             |
| ENSMUSG00000028603  | Scp2         | -0.74 | 0.00 | 0.00 | 0.41 | 0.00 | 0.00 | 0.01  | 0.86 | 1.00 | sterol carrier protein 2, liver [Source:MGI Symbol:Acc:MGI:98254]                                                |
| ENSMUSG0000017950   | Hnf4a        | -1.04 | 0.00 | 0.00 | 0.81 | 0.00 | 0.00 | 0.07  | 0.54 | 1.00 | hepatic nuclear factor 4, alpha [Source:MGI Symbol:Acc:MGI:109128]                                               |
| ENSMUSG00000032418  | Me1          | -0.95 | 0.00 | 0.00 | 0.47 | 0.00 | 0.00 | 0.19  | 0.10 | 1.00 | malic enzyme 1, NAD(P)+-dependent, cytosolic [Source:MGI Symbol:Acc:MGI:97043]                                   |
| ENSMUSG00000026864  | Phyh         | -0.79 | 0.00 | 0.00 | 0.29 | 0.00 | 0.00 | 0.05  | 0.65 | 1.00 | phytyl-CoA hydroxylase [Source:MGI Symbol:Acc:MGI:891978]                                                        |
| ENSMUSG0000002489   | Ach2         | -1.21 | 0.00 | 0.00 | 0.53 | 0.00 | 0.01 | 0.23  | 0.19 | 1.00 | acylglutathione S-transferase 2 [Source:MGI Symbol:Acc:MGI:1859310]                                              |
| ENSMUSG00000018339  | Gp3k         | -0.66 | 0.00 | 0.00 | 0.37 | 0.00 | 0.00 | -0.08 | 0.37 | 1.00 | glutathione peroxidase 3 [Source:MGI Symbol:Acc:MGI:105102]                                                      |
| ENSMUSG00000028571  | Cyp2j3       | -1.25 | 0.00 | 0.00 | 1.06 | 0.00 | 0.00 | 0.28  | 0.04 | 1.00 | cytochrome P450, family 2, subfamily J, polypeptide 13 [Source:MGI Symbol:Acc:MGI:1356197]                       |
| ENSMUSG00000037348  | Pspr7        | -1.20 | 0.00 | 0.00 | 0.58 | 0.00 | 0.01 | -0.05 | 0.71 | 1.00 | progesterin and adipop Q receptor family member VII [Source:MGI Symbol:Acc:MGI:1919154]                          |
| ENSMUSG0000027187   | Cal          | -0.64 | 0.00 | 0.00 | 0.26 | 0.00 | 0.00 | 0.05  | 0.56 | 1.00 | calataase [Source:MGI Symbol:Acc:MGI:88271]                                                                      |
| ENSMUSG0000000476   | Mert1a       | -0.97 | 0.00 | 0.00 | 0.66 | 0.00 | 0.00 | 0.03  | 0.81 | 1.00 | mannosidase 1, alpha [Source:MGI Symbol:Acc:MGI:104677]                                                          |
| ENSMUSG0000002189   | Osbp8        | -0.86 | 0.00 | 0.00 | 0.50 | 0.00 | 0.00 | 0.12  | 0.31 | 1.00 | oxysterol binding protein 8 [Source:MGI Symbol:Acc:MGI:2443807]                                                  |
| ENSMUSG00000048058  | Ldraf3       | -0.81 | 0.00 | 0.00 | 1.82 | 0.00 | 0.00 | 0.17  | 0.47 | 1.00 | low density lipoprotein receptor class A domain containing 3 [Source:MGI Symbol:Acc:MGI:2138856]                 |
| ENSMUSG00000025781  | Atp5c1       | -0.67 | 0.00 | 0.00 | 0.40 | 0.00 | 0.00 | 0.13  | 0.13 | 1.00 | ATP synthase, H+ transporting, mitochondrial F1 complex, gamma polypeptide 1 [Source:MGI Symbol:Acc:MGI:1261437] |
| ENSMUSG00000025393  | Atp5b        | -0.49 | 0.00 | 0.00 | 0.28 | 0.00 | 0.00 | 0.08  | 0.17 | 1.00 | ATP synthase, H+ transporting mitochondrial F1 complex, beta subunit [Source:MGI Symbol:Acc:MGI:107801]          |
| ENSMUSG00000034612  | Chst11       | -1.41 | 0.00 | 0.00 | 1.38 | 0.00 | 0.00 | 0.29  | 0.05 | 1.00 | carbohydrate sulfotransferase 11 [Source:MGI Symbol:Acc:MGI:1927166]                                             |
| ENSMUSG00000026794  | Hnf1b        | -1.01 | 0.00 | 0.00 | 0.81 | 0.00 | 0.01 | 0.19  | 0.47 | 1.00 | ATPase, Na+/K+ transporting, beta 1 polypeptide [Source:MGI Symbol:Acc:MGI:1914135]                              |
| ENSMUSG00000020679  | Hnf1b        | -1.38 | 0.00 | 0.00 | 0.81 | 0.00 | 0.00 | -0.28 | 0.13 | 1.00 | HNF1 homeobox B [Source:MGI Symbol:Acc:MGI:98505]                                                                |
| ENSMUSG000000017756 | Slc12a7      | -0.84 | 0.00 | 0.00 | 0.45 | 0.00 | 0.00 | -0.04 | 0.70 | 1.00 | solute carrier family 12, member 7 [Source:MGI Symbol:Acc:MGI:1342283]                                           |
| ENSMUSG00000027984  | Hadh         | -0.78 | 0.00 | 0.00 | 0.51 | 0.00 | 0.00 | 0.04  | 0.70 | 1.00 | hydroxyacyl-Coenzyme A dehydrogenase [Source:MGI Symbol:Acc:MGI:96009]                                           |
| ENSMUSG00000043719  | Col6a6       | -1.83 | 0.00 | 0.00 | 1.45 | 0.00 | 0.00 | -0.02 | 0.95 | 1.00 | collagen, type VI, alpha 6 [Source:MGI Symbol:Acc:MGI:2444259]                                                   |
| ENSMUSG00000024519  | Sc22a6       | -0.98 | 0.00 | 0.00 | 0.91 | 0.00 | 0.00 | 0.06  | 0.56 | 1.00 | solute carrier family 22 (organic anion transporter), member 6 [Source:MGI Symbol:Acc:MGI:892001]                |
| ENSMUSG00000024386  | Bcl6         | -0.96 | 0.00 | 0.00 | 0.50 | 0.00 | 0.00 | -0.12 | 0.31 | 1.00 | protein C [Source:MGI Symbol:Acc:MGI:977711]                                                                     |
| ENSMUSG00000022508  | Bcl6         | -1.41 | 0.00 | 0.00 | 0.62 | 0.00 | 0.02 | -0.40 | 0.37 | 1.00 | B cell leukemia/lymphoma 6 [Source:MGI Symbol:Acc:M                                                              |

ENSMUSG00000047409 Ctdspl -1.12 0.00 0.00 0.77 0.00 0.00 -0.08 0.61 1.00 CTD (carboxy-terminal domain, RNA polymerase II, polypeptide A) small phosphatase-like [Source:MGI Symbol:Acc:MG1:1916524]

ENSMUSG00000036879 Phkb -1.33 0.00 0.00 0.66 0.00 0.03 0.06 0.73 1.00 phosphorylase kinase beta [Source:MGI Symbol:Acc:MG1:97578]

ENSMUSG00000047638 Nr1h4 -0.98 0.00 0.00 0.46 0.00 0.02 0.29 0.10 1.00 nuclear receptor subfamily 1, group H, member 4 [Source:MGI Symbol:Acc:MG1:1352464]

ENSMUSG00000002533 Rps3 -1.04 0.00 0.00 0.58 0.00 0.03 0.03 0.83 1.00 nucleosomal core particle protein 3 [Source:MGI Symbol:Acc:MG1:1106542]

ENSMUSG00000022219 Cideb -0.78 0.00 0.00 0.34 0.00 0.02 0.03 0.83 1.00 cell death-inducing DNA fragmentation factor, alpha subunit-like effector B [Source:MGI Symbol:Acc:MG1:1270844]

ENSMUSG00000003318 Gstt2 -0.76 0.00 0.00 0.38 0.00 0.00 -0.20 0.13 1.00 glutathione S-transferase, theta 2 [Source:MGI Symbol:Acc:MG1:106188]

ENSMUSG000000093485 Gm20708 -1.15 0.00 0.00 0.76 0.00 0.00 0.14 0.37 1.00 predicted gene 20708 [Source:MGI Symbol:Acc:MG1:5313155]

ENSMUSG00000020219 Ntn4 -1.36 0.00 0.00 0.84 0.00 0.00 0.14 0.49 1.00 nectin 4 [Source:MGI Symbol:Acc:MG1:1889798]

ENSMUSG00000004856 Rpl30 -0.72 0.00 0.00 0.79 0.00 0.04 0.03 0.00 1.00 3' (5'-cap) guanine nucleotidyl transferase 3 [Source:MGI Symbol:Acc:MG1:2135608]

ENSMUSG00000029593 Pknox -1.05 0.00 0.00 0.54 0.00 0.02 0.03 0.84 1.00 protein kinase C, zeta [Source:MGI Symbol:Acc:MG1:97602]

ENSMUSG000000023915 Tnfrsf21 -0.84 0.00 0.00 0.62 0.00 0.00 -0.05 0.77 1.00 tumor necrosis factor receptor superfamily, member 21 [Source:MGI Symbol:Acc:MG1:2151075]

ENSMUSG00000025731 0610011F06Rik -0.79 0.00 0.00 0.38 0.00 0.01 -0.04 0.74 1.00 RIKEN cDNA 0610011F06 gene [Source:MGI Symbol:Acc:MG1:1915597]

ENSMUSG00000024953 Prdx6 -0.68 0.00 0.00 0.32 0.00 0.00 0.13 0.18 1.00 peroxidoxin 5 [Source:MGI Symbol:Acc:MG1:1859821]

ENSMUSG00000030759 Faf1 -0.66 0.00 0.00 0.31 0.00 0.01 0.23 0.02 1.00 fatty acyl CoA reductase 1 [Source:MGI Symbol:Acc:MG1:1914670]

ENSMUSG000000024593 Hsd17b4 -0.74 0.00 0.00 0.44 0.00 0.00 0.00 0.98 1.00 hydroxysteroid (17-beta) dehydrogenase 4 [Source:MGI Symbol:Acc:MG1:105689]

ENSMUSG00000000149 Gna12 -1.00 0.00 0.00 0.55 0.00 0.00 -0.04 0.80 1.00 guanine nucleotide binding protein, alpha 12 [Source:MGI Symbol:Acc:MG1:95767]

ENSMUSG00000035828 Pim3 -0.80 0.00 0.00 0.45 0.00 0.00 -0.14 0.25 1.00 proviral integration site 3 [Source:MGI Symbol:Acc:MG1:1355297]

ENSMUSG000000090231 Ctb -0.68 0.00 0.00 0.28 0.00 0.02 -0.16 0.16 1.00 complement factor B [Source:MGI Symbol:Acc:MG1:105975]

ENSMUSG00000043940 Wf3y -0.86 0.00 0.00 0.69 0.00 0.00 0.10 0.43 1.00 WD repeat and FYVE domain containing 3 [Source:MGI Symbol:Acc:MG1:1096875]

ENSMUSG00000004876 Lorg2 -0.91 0.00 0.00 0.60 0.00 0.00 0.00 1.00 1.00 lipoprotein 2, peroxisomal [Source:MGI Symbol:Acc:MG1:1914137]

ENSMUSG00000020902 Ntn1 -1.20 0.00 0.00 0.70 0.00 0.00 -0.21 0.18 1.00 nectin 1 [Source:MGI Symbol:Acc:MG1:105098]

ENSMUSG000000061578 Ksr2 -3.46 0.00 0.00 2.26 0.00 0.01 0.13 0.76 1.00 kinase suppressor of ras 2 [Source:MGI Symbol:Acc:MG1:3610315]

ENSMUSG000000062410 Hsd3b3 -1.02 0.00 0.00 0.74 0.00 0.00 -0.12 0.45 1.00 hydroxy-delta-5-steroid dehydrogenase, 3 beta- and steroid delta-isomerase 3 [Source:MGI Symbol:Acc:MG1:96235]

ENSMUSG00000010277 2610507B11Rik -0.53 0.00 0.00 0.24 0.00 0.01 0.07 0.42 1.00 RIKEN cDNA 2610507B11 gene [Source:MGI Symbol:Acc:MG1:1919753]

ENSMUSG000000033149 Pfnhd2 -0.77 0.00 0.00 0.31 0.00 0.02 0.00 1.00 1.00 pleckstrin homology-like domain, family B, member 2 [Source:MGI Symbol:Acc:MG1:2444981]

ENSMUSG000000062926 Cpeb3 -0.88 0.00 0.00 0.64 0.00 0.00 -0.15 0.25 1.00 casein phosphoprotein 1 [Source:MGI Symbol:Acc:MG1:1929076]

ENSMUSG000000012187 Mogat1 -0.83 0.00 0.00 0.59 0.00 0.00 0.08 0.51 1.00 monooxygenase/alpha-acyltransferase 1 [Source:MGI Symbol:Acc:MG1:1915643]

ENSMUSG000000027004 Frzb -1.15 0.00 0.00 1.01 0.00 0.00 0.27 0.08 1.00 frizzled-related protein [Source:MGI Symbol:Acc:MG1:892032]

ENSMUSG000000061731 Exat1 -1.32 0.00 0.00 0.75 0.00 0.01 -0.02 0.96 1.00 exostosin (multiple) 1 [Source:MGI Symbol:Acc:MG1:894663]

ENSMUSG000000030161 Gabarap1 -0.60 0.00 0.00 0.18 0.00 0.04 -0.23 0.04 1.00 gamma-aminobutyric acid (GABA) A receptor-associated protein-like 1 [Source:MGI Symbol:Acc:MG1:1914980]

ENSMUSG00000004757 Rpl33p -0.68 0.00 0.00 0.61 0.00 0.00 0.07 0.49 1.00 RAB3A interacting protein [Source:MGI Symbol:Acc:MG1:105533]

ENSMUSG00000036932 Alfn1 -0.78 0.00 0.00 0.54 0.00 0.04 0.07 0.53 1.00 apoptosis-inducing factor [Source:MGI Symbol:Acc:MG1:1349419]

ENSMUSG000000002635 Pam -0.80 0.00 0.00 0.36 0.00 0.04 0.03 0.84 1.00 peptidylglycine alpha-amidating monoxygenase [Source:MGI Symbol:Acc:MG1:97475]

ENSMUSG000000060224 Pyrxo2 -0.84 0.00 0.00 0.55 0.00 0.00 -0.19 0.16 1.00 pyridine nucleotide-disulphide oxidoreductase domain 2 [Source:MGI Symbol:Acc:MG1:1921830]

ENSMUSG000000030884 Uqcrc2 -0.55 0.00 0.00 0.33 0.00 0.00 0.11 0.17 1.00 ubiquinol cytochrome c reductase core protein 2 [Source:MGI Symbol:Acc:MG1:1914253]

ENSMUSG000000030826 Bca2 -1.00 0.00 0.00 0.62 0.00 0.00 0.01 0.97 1.00 branched chain aminotransferase 2, mitochondrial [Source:MGI Symbol:Acc:MG1:1276534]

ENSMUSG000000084351 mt-Co1 -0.37 0.00 0.00 0.63 0.00 0.00 0.04 0.50 1.00 mitochondrial encoded cytochrome c oxidase 1 [Source:MGI Symbol:Acc:MG1:1925504]

ENSMUSG000000005653 Atp5f1 -0.55 0.00 0.00 0.34 0.00 0.00 0.13 0.11 1.00 ATP synthase, H+ transporting, mitochondrial F0 complex, subunit B1 [Source:MGI Symbol:Acc:MG1:1100405]

ENSMUSG000000028538 Sl3gag3 -1.62 0.00 0.00 0.92 0.00 0.02 -0.04 0.84 1.00 ST3 beta-galactoside alpha-2,3-sialyltransferase 3 [Source:MGI Symbol:Acc:MG1:1316659]

ENSMUSG000000020098 Pcdh1 -0.79 0.00 0.00 0.45 0.00 0.00 0.06 0.64 1.00 plectrin 4 alpha carboxinamide diacylation/dimerization cofactor of heterocyte nuclear factor 1 alpha (TCF1) [Source:MGI Symbol:Acc:MG1:94873]

ENSMUSG00000003962 Anpdp -0.88 0.00 0.00 0.58 0.00 0.01 0.14 0.26 1.00 atyranil (membrane) aminopeptidase [Source:MGI Symbol:Acc:MG1:5000466]

ENSMUSG00000000117 Pfnhd3 -0.68 0.00 0.00 0.40 0.00 0.01 0.04 0.70 1.00 pfnhd3 [mitochondrial processing] beta [Source:MGI Symbol:Acc:MG1:1920328]

ENSMUSG000000031231 Cox2p1 -0.73 0.00 0.00 0.36 0.00 0.01 0.06 0.60 1.00 cytochrome c oxidase subunit VIII [Source:MGI Symbol:Acc:MG1:1913392]

ENSMUSG000000035673 Ghrp -0.83 0.00 0.00 0.43 0.00 0.01 0.09 0.48 1.00 glyoxylate reductase/hydroxypyruvate reductase [Source:MGI Symbol:Acc:MG1:1923488]

ENSMUSG00000003896 Mapkap1 -1.28 0.00 0.00 0.76 0.00 0.01 0.05 0.79 1.00 mitogen-activated protein kinase associated protein 1 [Source:MGI Symbol:Acc:MG1:2444554]

ENSMUSG000000028013 Ppa2 -0.90 0.00 0.00 0.52 0.00 0.00 0.10 0.44 1.00 pyrophosphatase (inorganic) 2 [Source:MGI Symbol:Acc:MG1:1922026]

ENSMUSG000000066512 Kik1b5 -1.12 0.00 0.00 0.73 0.00 0.00 -0.13 0.51 1.00 kallikrein 1-related peptidase b5 [Source:MGI Symbol:Acc:MG1:892202]

ENSMUSG000000028461 Cox2p2 -0.79 0.00 0.00 0.13 0.00 0.04 0.10 0.73 1.00 foliocin interacting protein 107 [Source:MGI Symbol:Acc:MG1:1913423]

ENSMUSG000000038652 Cpeb3 -1.22 0.00 0.00 0.64 0.00 0.02 0.04 0.01 1.00 cytoplasmic polyadenylation element binding protein 3 [Source:MGI Symbol:Acc:MG1:2443075]

ENSMUSG000000038462 Uqcrc1 -0.57 0.00 0.00 0.41 0.00 0.00 0.15 0.10 1.00 ubiquinol-cytochrome c reductase, Rieske iron-sulfur polypeptide 1 [Source:MGI Symbol:Acc:MG1:1913944]

ENSMUSG000000030004 Naa8 -0.82 0.00 0.00 0.66 0.00 0.00 0.23 0.12 1.00 N-acetyltransferase 8 (GCN5-related, putative) [Source:MGI Symbol:Acc:MG1:1915646]

ENSMUSG000000092511 Gm20547 -0.63 0.00 0.00 0.26 0.00 0.04 0.19 0.10 1.00 predicted gene 20547 [Source:MGI Symbol:Acc:MG1:5142012]

ENSMUSG000000014313 Coo6c -0.65 0.00 0.00 0.33 0.00 0.00 0.10 0.31 1.00 cytochrome oxidase subunit VIc [Source:MGI Symbol:Acc:MG1:104614]

ENSMUSG00000030482 Slc7a9 -0.80 0.00 0.00 0.45 0.00 0.01 -0.40 0.00 1.00 64 solute carrier family 7 (cationic amino acid transporter, y+ system), member 9 [Source:MGI Symbol:Acc:MG1:1353656]

ENSMUSG000000032120 C2cd21 -0.95 0.00 0.00 0.52 0.00 0.01 -0.05 0.75 1.00 SC2 calcium-dependent domain containing 2-like [Source:MGI Symbol:Acc:MG1:1919014]

ENSMUSG000000011770 Atp5g3 -0.61 0.00 0.00 0.43 0.00 0.00 0.17 0.07 1.00 ATP synthase, H+ transporting, mitochondrial F0 complex, subunit C3 (subunit 9) [Source:MGI Symbol:Acc:MG1:2442035]

ENSMUSG000000021764 Ndufs4 -1.02 0.00 0.00 0.51 0.00 0.04 0.10 0.49 1.00 NADH dehydrogenase (ubiquinone) Fe-S protein 4 [Source:MGI Symbol:Acc:MG1:1343135]

ENSMUSG000000060261 Ghd2 -0.72 0.00 0.00 0.48 0.00 0.00 -0.07 0.53 1.00 general transcription factor II I [Source:MGI Symbol:Acc:MG1:202722]

ENSMUSG00000001176 Fpn2 -0.67 0.00 0.00 0.13 0.00 0.04 0.10 0.73 1.00 foliocin interacting protein 108 [Source:MGI Symbol:Acc:MG1:2683054]

ENSMUSG000000036333 Kldns220 -0.61 0.00 0.00 0.39 0.00 0.00 -0.01 0.95 1.00 kinase D-interacting substrate 220 [Source:MGI Symbol:Acc:MG1:1924730]

ENSMUSG000000026259 Ngef -1.44 0.00 0.00 0.91 0.00 0.01 0.11 0.58 1.00 neuronal guanine nucleotide exchange factor [Source:MGI Symbol:Acc:MG1:1858414]

ENSMUSG00000001755 Coasy -0.55 0.00 0.00 0.27 0.00 0.03 0.02 0.89 1.00 Coenzyme A synthase [Source:MGI Symbol:Acc:MG1:1918993]

ENSMUSG00000004174 Sfn1 -0.64 0.00 0.00 0.42 0.00 0.00 0.15 0.15 1.00 sideroflexin 1 [Source:MGI Symbol:Acc:MG1:2137677]

ENSMUSG000000000000 Kpna -0.83 0.00 0.00 0.51 0.00 0.00 -0.11 0.39 1.00 kynurenine 3-monooxygenase (kynureninase 3 hydroxylase) [Source:MGI Symbol:Acc:MG1:2138151]

ENSMUSG000000038679 Trps1 -1.17 0.00 0.00 0.81 0.00 0.00 0.00 0.01 1.00 trichostatin A response protein 1 (human) [Source:MGI Symbol:Acc:MG1:1927616]

ENSMUSG000000014606 Slc25a11 -0.71 0.00 0.00 0.40 0.00 0.01 0.03 0.82 1.00 solute carrier family 25 (mitochondrial carrier oxoglutarate carrier), member 11 [Source:MGI Symbol:Acc:MG1:1915113]

ENSMUSG000000026004 Arsg -1.29 0.00 0.00 0.81 0.00 0.01 -0.23 0.23 1.00 arylsulfatase G [Source:MGI Symbol:Acc:MG1:1921258]

ENSMUSG000000025732 Fam195a -1.02 0.00 0.00 0.52 0.00 0.03 0.13 0.38 1.00 family with sequence similarity 195, member A [Source:MGI Symbol:Acc:MG1:1915491]

ENSMUSG00000004659 Pfkfb7 -0.98 0.00 0.00 0.74 0.00 0.00 -0.09 0.57 1.00 pleckstrin homology domain containing, family A member 7 [Source:MGI Symbol:Acc:MG1:2445094]

ENSMUSG000000028617 Ghrp2 -1.53 0.00 0.00 0.44 0.00 0.00 0.17 0.44 1.00 SRY-box containing gene 1 [Source:MGI Symbol:Acc:MG1:93068]

ENSMUSG000000033488 BC026858 -0.69 0.00 0.00 0.48 0.00 0.00 0.01 0.98 1.00 cDNA sequence BC026858 [Source:MGI Symbol:Acc:MG1:2448516]

ENSMUSG000000029772 Ahcy2 -0.55 0.00 0.00 0.44 0.00 0.00 0.08 0.41 1.00 S-adenosylhomocysteine hydrolase-like 2 [Source:MGI Symbol:Acc:MG1:1921590]

ENSMUSG000000023233 Hrsp12 -0.52 0.00 0.00 0.33 0.00 0.00 -0.12 0.13 1.00 heat-responsive protein 12 [Source:MGI Symbol:Acc:MG1:1095401]

ENSMUSG000000019822 Smpd2 -1.05 0.00 0.00 0.63 0.00 0.01 -0.04 0.82 1.00 sphingomyelin phosphodiesterase 2, neutral [Source:MGI Symbol:Acc:MG1:1278330]

ENSMUSG000000000000 Smpd5 -0.57 0.00 0.00 0.37 0.00 0.00 0.07 0.48 1.00 sphingomyelin-like protein 1 [Source:MGI Symbol:Acc:MG1:108081]

ENSMUSG000000029467 Atp2a2 -0.80 0.00 0.00 0.37 0.00 0.00 0.08 0.44 1.00 ATPase, Ca++ transporting, cardiac muscle, slow twitch 2 [Source:MGI Symbol:Acc:MG1:88110]

ENSMUSG000000020258 Glyck -0.66 0.00 0.00 0.54 0.00 0.00 0.15 0.19 1.00 glycerate kinase [Source:MGI Symbol:Acc:MG1:2444085]

ENSMUSG000000019872 Smpd3a -0.53 0.00 0.00 0.24 0.00 0.04 -0.09 0.34 1.00 sphingomyelin phosphodiesterase, acid-like 3A [Source:MGI Symbol:Acc:MG1:1931437]

ENSMUSG000000020100 Slc29a3 -0.80 0.00 0.00 0.62 0.00 0.00 -0.16 0.21 1.00 solute carrier family 29 (nucleoside transporters), member 3 [Source:MGI Symbol:Acc:MG1:1918529]

ENSMUSG000000025893 Rpor -1.58 0.00 0.00 0.87 0.00 0.04 0.13 0.54 1.00 regulatory associated protein of MTOR, complex 1 [Source:MGI Symbol:Acc:MG1:1921620]

ENSMUSG00000000176 Fpn3 -0.56 0.00 0.00 0.50 0.00 0.00 0.19 0.02 1.00 solute carrier family 19 (nucleoside transporters), member 16 [Source:MGI Symbol:Acc:MG1:1314842]

ENSMUSG000000018736 Naa1 -0.80 0.00 0.00 0.50 0.00 0.00 0.08 0.56 1.00 nuclear distribution gene E-like homolog 1 (A. nidulans) [Source:MGI Symbol:Acc:MG1:1932915]

ENSMUSG000000027130 Slc12a6 -0.88 0.00 0.00 0.43 0.00 0.04 0.41 0.01 1.00 solute carrier family 12, member 6 [Source:MGI Symbol:Acc:MG1:2135960]

ENSMUSG000000028179 Cth -0.64 0.00 0.00 0.55 0.00 0.00 0.16 0.14 1.00 cystathionase (cystathionine gamma-lyase) [Source:MGI Symbol:Acc:MG1:1339968]

ENSMUSG000000030301 Cods91 -1.51 0.00 0.00 0.82 0.00 0.04 0.03 0.95 1.00 chitinase domain containing 91 [Source:MGI Symbol:Acc:MG1:1914265]

ENSMUSG000000028043 Hsp90 -0.63 0.00 0.00 0.35 0.00 0.00 0.07 0.44 1.00 ATP synthase, H+ transporting, mitochondrial F0 complex, subunit F1 [Source:MGI Symbol:Acc:MG1:107777]

ENSMUSG000000028189 Ctse -1.07 0.00 0.00 0.56 0.00 0.05 0.15 0.37 1.00 cathepsin D, D-N-acetyl [Source:MGI Symbol:Acc:MG1:1921495]

ENSMUSG00000008629 Gm11788 -1.41 0.00 0.00 0.97 0.00 0.00 0.01 1.00 1.00 predicted gene 11788 [Source:MGI Symbol:Acc:MG1:3649843]

ENSMUSG00000027900 Dram2 -0.79 0.00 0.00 0.41 0.00 0.03 0.03 0.82 1.00 DNA-damage regulated autophagy modulator 2 [Source:MGI Symbol:Acc:MG1:1914421]

ENSMUSG000000027589 Pmtm2 -0.90 0.00 0.00 0.46 0.00 0.05 -0.04 0.85 1.00 succinate-L-isoaspartate (D-aspartate) O-methyltransferase domain containing 2 [Source:MGI Symbol:Acc:MG1:1923327]

ENSMUSG00000000171 Sdhf -0.57 0.00 0.00 0.37 0.00 0.00 0.07 0.50 1.00 succinate dehydrogenase complex, subunit D, integral membrane protein [Source:MGI Symbol:Acc:MG1:1914175]

ENSMUSG000000025633 Hsp51 -0.83 0.00 0.00 0.61 0.00 0.00 0.12 0.24 1.00 metastasis suppressor 5 [Source:MGI Symbol:Acc:MG1:1924916]

ENSMUSG00000047496 Rnl152 -1.08 0.00 0.00 0.98 0.00 0.00 0.24 0.16 1.00 ring finger protein 152 [Source:MGI Symbol:Acc:MG1:2443787]

ENSMUSG000000022132 Cldn10 -0.72 0.00 0.00 0.44 0.00 0.00 -0.20 0.09 1.00 claudin 10 [Source:MGI Symbol:Acc:MG1:1913101]

ENSMUSG000000009378 Slc16a12 -0.74 0.00 0.00 0.69 0.00 0.00 0.02 0.91 1.00 solute carrier family 16 (monocarboxylic acid transporters), member 12 [Source:MGI Symbol:Acc:MG1:2147716]

ENSMUSG0000000034171 Fafh -0.91 0.00 0.00 0.47 0.00 0.04 -0.23 0.11 1.00 fatty acid amide hydrolase [Source:MGI Symbol:Acc:MG1:109609]

ENSMUSG00000002526 Aak6 -0.92 0.00 0.00 0.59 0.00 0.01 0.01 0.97 1.00 aducan 3 (gamma) [Source:MGI Symbol:Acc:MG1:1354161]

ENSMUSG00000005892 Slc110053 -0.63 0.00 0.00 0.42 0.00 0.00 0.02 0.60 1.00 predicted gene 10853 [Source:MGI Symbol:Acc:MG1:3704933]

ENSMUSG00000013593 Ndufs1 -0.50 0.00 0.00 0.32 0.00 0.00 0.11 0.23 1.00 NADH dehydrogenase (ubiquinone) Fe-S protein 2 [Source:MGI Symbol:Acc:MG1:2385111]

ENSMUSG000000024038 Ndufs3 -0.80 0.00 0.00 0.52 0.00 0.00 0.06 0.68 1.00 NADH dehydrogenase (ubiquinone) flavoprotein 3 [Source:MGI Symbol:Acc:MG1:1890994]

ENSMUSG000000027673 Ndufb5 -0.71 0.00 0.00 0.40 0.00 0.01 0.09 0.49 1.00 NADH dehydrogenase (ubiquinone) 1 beta subcomplex, 5 [Source:MGI Symbol:Acc:MG1:1913296]

ENSMUSG000000069394 Cycs -0.62 0.00 0.00 0.27 0.00 0.00 0.31 0.00 1.00 cytochrome c, somatic [Source:MGI Symbol:Acc:MG1:89578]

ENSMUSG000000028363 Hsp101 -0.52 0.00 0.00 0.41 0.00 0.05 0.09 0.75 1.00 heat shock domain containing regulator 2 [Source:MGI Symbol:Acc:MG1:1316708]

ENSMUSG000000028855 Mfd2a -2.01 0.00 0.00 1.17 0.00 0.04 0.55 0.02 1.00 major facilitator superfamily domain containing 2A [Source:MGI Symbol:Acc:MG1:1923824]

ENSMUSG000000031384 A8b9 -1.51 0.00 0.00 0.92 0.00 0.02 -0.13 0.61 1.00 ankyrin repeat and SOCS box-containing 9 [Source:MGI Symbol:Acc:MG1:1916549]

ENSMUSG000000039428 Tmem135 -0.93 0.00 0.00 0.73 0.00 0.00 0.00 1.00 1.00 transmembrane protein 135 [Source:MGI Symbol:Acc:MG1:1920009]

ENSMUSG000000026131 Dst -1.09 0.00 0.00 0.29 0.00 0.02 0.08 0.44 1.00 dystonin [Source:MGI Symbol:Acc:MG1:104627]

ENSMUSG00000003875 Hsp6 -1.04 0.00 0.00 0.66 0.00 0.01 0.21 0.21 1.00 hsp60 [Source:MGI Symbol:Acc:MG1:103188]

ENSMUSG000000069729 Arhb7 -1.21 0.00 0.00 0.72 0.00 0.01 0.04 0.86 1.00 AT rich interactive domain 1B (SWI-like) [Source:MGI Symbol:Acc:MG1:1926129]

ENSMUSG000000040327 Cui9 -1.18 0.00 0.00 0.83 0.00 0.00 0.12 0.54 1.00 cullin 9 [Source:MGI Symbol:Acc:MG1:1925559]

ENSMUSG000000031666 Rbt2 -0.93 0.00 0.00 0.66 0.00 0.00 0.01 1.00 1.00 retinoblastoma-like 2 [Source:MGI Symbol:Acc:MG1:105085]

ENSMUSG000000034853 Acot11 -0.75 0.00 0.00 0.56 0.00 0.00 -0.18 0.18 1.00 acyl-CoA thioesterase 11 [Source:MGI Symbol:Acc:MG1:1913736]

ENSMUSG000000028906 Epk4 -1.64 0.00 0.00 0.43 0.00 0.00 0.02 0.92 1.00 erythrocyte protein band 4.1 [Source:MGI Symbol:Acc:MG1:95401]

ENSMUSG000000029104 Hst5 -0.84 0.00 0.00 0.45 0.00 0.00 0.10 0.46 1.00 huntingtin [Source:MGI Symbol:Acc:MG1:96367]

ENSMUSG000000087232 Gm14764 -1.84 0.00 0.00 1.11 0.00 0.03 0.39 0.09 1.00 predicted gene 14764 [Source:MGI Symbol:Acc:MG1:3705248]

ENSMUSG000000026469 Xpr1 -0.86 0.00 0.00 0.59 0.00 0.00 0.18 0.21 1.00 xenotropic and polytropic retrovirus receptor 1 [Source:MGI Symbol:Acc:MG1:97932]

ENSMUSG000000031924 Cyb5b -0.44 0.00 0.00 0.38 0.00 0.00 0.01 0.87 1.00 cytochrome b5 type B [Source:MGI Symbol:Acc:MG1:1913677]

ENSMUSG000000021775 Nr1d2 -0.68 0.00 0.00 0.57 0.00 0.00 0.19 0.12 1.00 nuclear receptor subfamily 1, group D, member 2 [Source:MGI Symbol:Acc:MG1:2449205]

ENSMUSG000000021696 Bcl1 -1.04 0.00 0.00 0.58 0.00 0.05 -0.03 0.88 1.00 adaptor-related protein complex 3, beta 1 subunit [Source:MGI Symbol:Acc:MG1:1333879]

ENSMUSG000000081859 Inad1 -0.94 0.00 0.00 0.71 0.00 0.00 0.01 0.47 1.00 InaD-like (Drosophila) [Source:MGI Symbol:Acc:MG1:1277960]

ENSMUSG000000005199 Lgr4 -0.88 0.00 0.00 0.69 0.00 0.00 -0.05 0.74 1.00 leucine-rich repeat-containing G protein-coupled receptor 4 [Source:MGI Symbol:Acc:MG1:1891468]

ENSMUSG000000028967 Erf11 -0.71 0.00 0.00 0.34 0.00 0.01 0.00 0.90 1.00 ERBB receptor feedback inhibitor 1 [Source:MGI Symbol:Acc:MG1:1921405]

ENSMUSG000000036395 Glt12 -0.83 0.00 0.00 0.84 0.00 0.00 -0.03 0.82 1.00 galactosidase, beta 1-like 2 [Source:MGI Symbol:Acc:MG1:2388283]

ENSMUSG000000032330 Cox7a2 -0.64 0.00 0.00 0.44 0.00 0.00 0.13 0.24 1.00 cytochrome c oxid

|                      |              |       |      |      |      |      |      |       |      |      |                                                                                                                                           |
|----------------------|--------------|-------|------|------|------|------|------|-------|------|------|-------------------------------------------------------------------------------------------------------------------------------------------|
| ENSMUSG000000038740  | Fam125b      | -1.37 | 0.00 | 0.00 | 0.88 | 0.00 | 0.02 | 0.00  | 1.00 | 1.00 | family with sequence similarity 125, member B [Source:MGI Symbol;Acc:MG:1919793]                                                          |
| ENSMUSG00000001484   | Lman2        | -0.59 | 0.00 | 0.00 | 0.31 | 0.00 | 0.05 | 0.07  | 0.52 | 1.00 | lectin, mannose-binding 2 [Source:MGI Symbol;Acc:MG:1914140]                                                                              |
| ENSMUSG000000052738  | Surgn1       | -0.53 | 0.00 | 0.00 | 0.43 | 0.00 | 0.00 | 0.05  | 0.65 | 1.00 | succinate-CoA ligase, GDP-forming, alpha subunit [Source:MGI Symbol;Acc:MG:1927234]                                                       |
| ENSMUSG000000000000  |              | -1.47 | 0.00 | 0.00 | 0.17 | 0.00 | 0.00 | 0.17  | 0.01 | 1.00 | muscle elevator 1 [Source:MGI Symbol;Acc:MG:2148801]                                                                                      |
| ENSMUSG000000046329  | Slc25a23     | -0.79 | 0.00 | 0.00 | 0.46 | 0.00 | 0.03 | -0.15 | 0.32 | 1.00 | solute carrier family 25 (mitochondrial carrier, phosphate carrier), member 23 [Source:MGI Symbol;Acc:MG:1914222]                         |
| ENSMUSG000000057315  | Arhgap24     | -0.62 | 0.00 | 0.00 | 0.45 | 0.00 | 0.00 | -0.08 | 0.47 | 1.00 | Rho GTPase activating protein 24 [Source:MGI Symbol;Acc:MG:1922647]                                                                       |
| ENSMUSG000000024935  | Slc1a1       | -0.51 | 0.00 | 0.00 | 0.56 | 0.00 | 0.00 | 0.12  | 0.22 | 1.00 | solute carrier family 1 (neuronal/epithelial high affinity glutamate transporter, system Xag), member 1 [Source:MGI Symbol;Acc:MG:105083] |
| ENSMUSG000000052942  | Gli3         | -0.91 | 0.00 | 0.00 | 0.65 | 0.00 | 0.00 | 0.09  | 0.58 | 1.00 | GLIS family zinc finger 3 [Source:MGI Symbol;Acc:MG:19244289]                                                                             |
| ENSMUSG000000000000  |              | -0.88 | 0.00 | 0.00 | 0.68 | 0.00 | 0.00 | 0.06  | 0.72 | 1.00 | DBP domain containing 19 [Source:MGI Symbol;Acc:MG:19246322]                                                                              |
| ENSMUSG000000057939  | Exoc5        | -0.93 | 0.00 | 0.00 | 0.66 | 0.00 | 0.00 | -0.07 | 0.73 | 1.00 | exocyst complex component 6 [Source:MGI Symbol;Acc:MG:1951611]                                                                            |
| ENSMUSG0000000078636 | Gm3200       | -0.35 | 0.00 | 0.00 | 0.17 | 0.00 | 0.04 | 0.00  | 0.99 | 1.00 | predicted pseudogene 3200 [Source:MGI Symbol;Acc:MG:3781379]                                                                              |
| ENSMUSG000000008610  | Gm15318      | -1.55 | 0.00 | 0.00 | 0.98 | 0.00 | 0.03 | -0.10 | 0.69 | 1.00 | predicted gene 15318 [Source:MGI Symbol;Acc:MG:3705106]                                                                                   |
| ENSMUSG0000000095042 | Gm12537      | -0.35 | 0.00 | 0.00 | 0.17 | 0.00 | 0.04 | 0.00  | 0.98 | 1.00 | predicted gene 12537 [Source:MGI Symbol;Acc:MG:3650720]                                                                                   |
| ENSMUSG000000002762  | Suncr1       | -1.08 | 0.00 | 0.00 | 0.89 | 0.00 | 0.00 | -0.01 | 1.00 | 1.00 | succinate receptor 1 [Source:MGI Symbol;Acc:MG:1934135]                                                                                   |
| ENSMUSG000000000285  | P19kaa2      | -0.52 | 0.00 | 0.00 | 0.46 | 0.00 | 0.00 | 0.14  | 0.19 | 1.00 | protein kinase, AMP-activated, alpha 2 catalytic subunit [Source:MGI Symbol;Acc:MG:1336173]                                               |
| ENSMUSG000000058620  | Adra2b       | -0.73 | 0.00 | 0.00 | 0.82 | 0.00 | 0.00 | -0.12 | 0.40 | 1.00 | adrenergic receptor, alpha 2b [Source:MGI Symbol;Acc:MG:187935]                                                                           |
| ENSMUSG00000004808   | S100g        | -0.69 | 0.00 | 0.00 | 0.37 | 0.00 | 0.00 | -0.29 | 0.06 | 1.00 | S100 calcium binding protein G [Source:MGI Symbol;Acc:MG:104528]                                                                          |
| ENSMUSG000000062073  | Gm10109      | -1.24 | 0.00 | 0.00 | 0.92 | 0.00 | 0.00 | 0.03  | 0.94 | 1.00 | predicted gene 10109 [Source:MGI Symbol;Acc:MG:3647742]                                                                                   |
| ENSMUSG000000006939  | Gm12070      | -0.35 | 0.00 | 0.00 | 0.17 | 0.00 | 0.04 | 0.00  | 0.98 | 1.00 | predicted gene 12070 [Source:MGI Symbol;Acc:MG:3650751]                                                                                   |
| ENSMUSG000000004118  | Stra6a5      | -1.25 | 0.00 | 0.00 | 0.75 | 0.00 | 0.05 | 0.21  | 0.33 | 1.00 | ST6 alpha-N-acetyl-neuraminidase alpha-2,8-sialyltransferase 6 [Source:MGI Symbol;Acc:MG:2386797]                                         |
| ENSMUSG0000000095143 | Hsd3B4       | -0.60 | 0.00 | 0.00 | 0.63 | 0.00 | 0.00 | -0.10 | 0.40 | 1.00 | hydroxy-delta-5-steroid dehydrogenase, 3 beta- and steroid delta-isomerase 4 [Source:MGI Symbol;Acc:MG:96236]                             |
| ENSMUSG000000000399  | Ndufa9       | -0.56 | 0.00 | 0.00 | 0.42 | 0.00 | 0.00 | 0.09  | 0.43 | 1.00 | NADH dehydrogenase (ubiquinone) 1 alpha subcomplex, 9 [Source:MGI Symbol;Acc:MG:1913358]                                                  |
| ENSMUSG000000021097  | Climn        | -0.64 | 0.00 | 0.00 | 0.72 | 0.00 | 0.00 | 0.04  | 0.70 | 1.00 | calmin [Source:MGI Symbol;Acc:MG:12136957]                                                                                                |
| ENSMUSG000000005533  | Igf1r        | -1.00 | 0.00 | 0.00 | 0.99 | 0.00 | 0.00 | 0.19  | 0.30 | 1.00 | insulin-like growth factor 1 receptor [Source:MGI Symbol;Acc:MG:96433]                                                                    |
| ENSMUSG000000030199  | Enr6         | -1.00 | 0.00 | 0.00 | 0.65 | 0.00 | 0.03 | 0.40  | 0.02 | 1.00 | ets variant gene 6 (TEL oncogene) [Source:MGI Symbol;Acc:MG:1095393]                                                                      |
| ENSMUSG000000000000  |              | -0.75 | 0.00 | 0.00 | 0.55 | 0.00 | 0.00 | 0.14  | 0.24 | 1.00 | nicotinamide sulfonamide reductase B1 [Source:MGI Symbol;Acc:MG:1351642]                                                                  |
| ENSMUSG000000025890  | Hspd1        | -0.45 | 0.00 | 0.00 | 0.23 | 0.00 | 0.00 | 0.25  | 0.01 | 1.00 | heat shock protein 1 (chaperonin) [Source:MGI Symbol;Acc:MG:96242]                                                                        |
| ENSMUSG000000017253  | Slc25a16     | -0.66 | 0.00 | 0.00 | 0.42 | 0.00 | 0.01 | 0.12  | 0.33 | 1.00 | solute carrier family 25 (mitochondrial carrier, Graves disease autoantigen), member 16 [Source:MGI Symbol;Acc:MG:1920382]                |
| ENSMUSG000000002816  | Ppp3ca       | -1.01 | 0.00 | 0.00 | 0.67 | 0.00 | 0.02 | 0.10  | 0.62 | 1.00 | protein phosphatase 3, catalytic subunit, alpha isoform [Source:MGI Symbol;Acc:MG:107164]                                                 |
| ENSMUSG000000016319  | Slc25a5      | -0.45 | 0.00 | 0.00 | 0.37 | 0.00 | 0.00 | 0.10  | 0.22 | 1.00 | solute carrier family 25 (mitochondrial carrier, adenine nucleotide translocator), member 5 [Source:MGI Symbol;Acc:MG:1353496]            |
| ENSMUSG000000002619  | Lpss6        | -0.65 | 0.00 | 0.00 | 0.49 | 0.00 | 0.00 | 0.15  | 0.23 | 1.00 | acyl-CoA oxidase 12 [Source:MGI Symbol;Acc:MG:1921406]                                                                                    |
| ENSMUSG000000029059  | Zfp105       | -0.83 | 0.00 | 0.00 | 0.55 | 0.00 | 0.02 | -0.03 | 0.83 | 1.00 | RIKEN cDNA 2810405K02 gene [Source:MGI Symbol;Acc:MG:1913719]                                                                             |
| ENSMUSG000000053436  | Mapk14       | -0.68 | 0.00 | 0.00 | 0.45 | 0.00 | 0.01 | 0.11  | 0.42 | 1.00 | mitogen-activated protein kinase 14 [Source:MGI Symbol;Acc:MG:1346865]                                                                    |
| ENSMUSG0000000083773 | Gm13394      | -0.34 | 0.00 | 0.00 | 0.18 | 0.00 | 0.01 | 0.01  | 0.86 | 1.00 | predicted gene 13394 [Source:MGI Symbol;Acc:MG:3651848]                                                                                   |
| ENSMUSG000000005938  | Acbd4        | -0.64 | 0.00 | 0.00 | 0.59 | 0.00 | 0.00 | 0.01  | 0.95 | 1.00 | acyl-Coenzyme A binding domain containing 4 [Source:MGI Symbol;Acc:MG:1914381]                                                            |
| ENSMUSG0000000068513 | Kk1b4        | -4.91 | 0.00 | 0.00 | 5.88 | 0.00 | 0.00 | 0.78  | 0.22 | 1.00 | kallikrein 1-related peptidase b4 [Source:MGI Symbol;Acc:MG:971320]                                                                       |
| ENSMUSG000000002897  | Per3         | -1.09 | 0.00 | 0.00 | 0.87 | 0.00 | 0.02 | 0.31  | 0.07 | 1.00 | period homolog 3 (Drosophila) [Source:MGI Symbol;Acc:MG:1277134]                                                                          |
| ENSMUSG0000000095388 | Gm10681      | -0.58 | 0.00 | 0.00 | 0.62 | 0.00 | 0.00 | -0.09 | 0.45 | 1.00 | predicted gene 10681 [Source:MGI Symbol;Acc:MG:3711284]                                                                                   |
| ENSMUSG000000006456  | Rdh16        | -0.61 | 0.00 | 0.00 | 0.65 | 0.00 | 0.00 | 0.09  | 0.46 | 1.00 | retinol dehydrogenase 16 [Source:MGI Symbol;Acc:MG:1201375]                                                                               |
| ENSMUSG000000002210  | Dhrs4        | -0.61 | 0.00 | 0.00 | 0.38 | 0.00 | 0.01 | 0.07  | 0.59 | 1.00 | dehydrogenase/reductase (SDR family) member 4 [Source:MGI Symbol;Acc:MG:901616]                                                           |
| ENSMUSG000000002127  | Abcd3        | -0.49 | 0.00 | 0.00 | 0.37 | 0.00 | 0.00 | 0.11  | 0.23 | 1.00 | ATP-binding cassette, sub-family D (ALD), member 3 [Source:MGI Symbol;Acc:MG:1349216]                                                     |
| ENSMUSG000000002735  | Lpsa6        | -0.82 | 0.00 | 0.00 | 0.58 | 0.00 | 0.00 | 0.26  | 0.43 | 1.00 | lysyl homolg, ceramide synthase 6 [Source:MGI Symbol;Acc:MG:2442564]                                                                      |
| ENSMUSG000000047230  | Cldn2        | -0.45 | 0.00 | 0.00 | 0.24 | 0.00 | 0.00 | -0.07 | 0.49 | 1.00 | claudin 2 [Source:MGI Symbol;Acc:MG:1278110]                                                                                              |
| ENSMUSG000000057228  | Adad2        | -0.75 | 0.00 | 0.00 | 0.93 | 0.00 | 0.00 | 0.29  | 0.01 | 1.00 | aminoadipate aminotransferase [Source:MGI Symbol;Acc:MG:1345167]                                                                          |
| ENSMUSG0000000059493 | Nhs          | -1.53 | 0.00 | 0.00 | 1.12 | 0.00 | 0.01 | -0.16 | 0.56 | 1.00 | Nance-Horan syndrome (human) [Source:MGI Symbol;Acc:MG:2684894]                                                                           |
| ENSMUSG0000000072946 | Ptgr2        | -0.59 | 0.00 | 0.00 | 0.42 | 0.00 | 0.00 | 0.10  | 0.39 | 1.00 | prostaglandin reductase 2 [Source:MGI Symbol;Acc:MG:1916372]                                                                              |
| ENSMUSG0000000009281 | Rares2       | -0.98 | 0.00 | 0.00 | 0.64 | 0.00 | 0.03 | 0.21  | 0.25 | 1.00 | retinoic acid receptor responder (tazarotene induced) 2 [Source:MGI Symbol;Acc:MG:1918910]                                                |
| ENSMUSG000000001959  | Ndufb11      | -1.09 | 0.00 | 0.00 | 0.35 | 0.00 | 0.00 | 0.09  | 0.28 | 1.00 | lactate dehydrogenase B [Source:MGI Symbol;Acc:MG:96763]                                                                                  |
| ENSMUSG000000029632  | Ndufa4       | -0.48 | 0.00 | 0.00 | 0.32 | 0.00 | 0.00 | 0.14  | 0.15 | 1.00 | NADH dehydrogenase (ubiquinone) 1 alpha subcomplex, 4 [Source:MGI Symbol;Acc:MG:107686]                                                   |
| ENSMUSG0000000025533 | Asl          | -0.47 | 0.00 | 0.00 | 0.31 | 0.00 | 0.01 | -0.05 | 0.68 | 1.00 | argininosuccinate lyase [Source:MGI Symbol;Acc:MG:88084]                                                                                  |
| ENSMUSG0000000028975 | Pex14        | -1.05 | 0.00 | 0.00 | 0.66 | 0.00 | 0.05 | -0.02 | 0.95 | 1.00 | peroxisomal biogenesis factor 14 [Source:MGI Symbol;Acc:MG:1927868]                                                                       |
| ENSMUSG000000020664  | Did          | -0.42 | 0.00 | 0.00 | 0.26 | 0.00 | 0.01 | 0.17  | 0.06 | 1.00 | dihydroipomate dehydrogenase [Source:MGI Symbol;Acc:MG:107450]                                                                            |
| ENSMUSG000000002619  | Dst          | -0.52 | 0.00 | 0.00 | 0.36 | 0.00 | 0.00 | 0.17  | 0.09 | 1.00 | bisphosphate 3, nucleotidase 1 [Source:MGI Symbol;Acc:MG:1338600]                                                                         |
| ENSMUSG00000001384   | Sudc3        | -1.01 | 0.00 | 0.00 | 0.90 | 0.00 | 0.00 | 0.15  | 0.47 | 1.00 | sushi domain containing 3 [Source:MGI Symbol;Acc:MG:1913579]                                                                              |
| ENSMUSG000000007817  | Zmz1         | -0.74 | 0.00 | 0.00 | 0.51 | 0.00 | 0.01 | -0.11 | 0.46 | 1.00 | zinc finger, MIZ-type containing 1 [Source:MGI Symbol;Acc:MG:3040693]                                                                     |
| ENSMUSG000000057666  | Gapdh        | -0.34 | 0.00 | 0.00 | 0.17 | 0.00 | 0.01 | 0.02  | 0.74 | 1.00 | glyceraldehyde-3-phosphate dehydrogenase [Source:MGI Symbol;Acc:MG:95640]                                                                 |
| ENSMUSG0000000062397 | Zfp706       | -0.59 | 0.00 | 0.00 | 0.34 | 0.00 | 0.00 | 0.15  | 0.19 | 1.00 | zinc finger protein 706 [Source:MGI Symbol;Acc:MG:1915286]                                                                                |
| ENSMUSG0000000090817 | Gm4450       | -0.58 | 0.00 | 0.00 | 0.60 | 0.00 | 0.00 | -0.09 | 0.47 | 1.00 | predicted gene 4450 [Source:MGI Symbol;Acc:MG:3782634]                                                                                    |
| ENSMUSG0000000003246 | Lpsa5        | -0.35 | 0.00 | 0.00 | 0.29 | 0.00 | 0.00 | 0.09  | 0.28 | 1.00 | NADH dehydrogenase (ubiquinone) 1 beta subcomplex, 11 [Source:MGI Symbol;Acc:MG:1349919]                                                  |
| ENSMUSG0000000039988 | Ankrd13c     | -0.59 | 0.00 | 0.00 | 0.34 | 0.00 | 0.04 | 0.15  | 0.21 | 1.00 | ankyrin repeat domain 13c [Source:MGI Symbol;Acc:MG:2139746]                                                                              |
| ENSMUSG0000000036503 | Rnf13        | -0.59 | 0.00 | 0.00 | 0.36 | 0.00 | 0.03 | 0.02  | 0.88 | 1.00 | ring finger protein 13 [Source:MGI Symbol;Acc:MG:1346341]                                                                                 |
| ENSMUSG000000012846  | Peil2        | -0.90 | 0.00 | 0.00 | 0.67 | 0.00 | 0.01 | 0.06  | 0.76 | 1.00 | pellino 2 [Source:MGI Symbol;Acc:MG:1891445]                                                                                              |
| ENSMUSG000000017639  | Rab11fip4    | -0.86 | 0.00 | 0.00 | 0.57 | 0.00 | 0.03 | -0.15 | 0.41 | 1.00 | RAB11 family interacting protein 4 (class I) [Source:MGI Symbol;Acc:MG:2442920]                                                           |
| ENSMUSG000000002735  | Dst          | -0.52 | 0.00 | 0.00 | 0.29 | 0.00 | 0.00 | 0.14  | 0.10 | 1.00 | lysyl homologue, succinyltransferase (E2 component of 2-oxoglutarate complex) [Source:MGI Symbol;Acc:MG:1926170]                          |
| ENSMUSG0000000056706 | Rfx2         | -0.51 | 0.00 | 0.00 | 0.33 | 0.00 | 0.00 | 0.09  | 0.33 | 1.00 | succinate dehydrogenase complex, subunit C, integral membrane protein [Source:MGI Symbol;Acc:MG:1913302]                                  |
| ENSMUSG0000000078965 | Gm12033      | -0.34 | 0.00 | 0.00 | 0.18 | 0.00 | 0.01 | 0.01  | 0.86 | 1.00 | predicted gene 12033 [Source:MGI Symbol;Acc:MG:3650772]                                                                                   |
| ENSMUSG0000000025584 | Pde8a        | -0.87 | 0.00 | 0.00 | 0.58 | 0.00 | 0.03 | -0.01 | 0.96 | 1.00 | phosphodiesterase 8A [Source:MGI Symbol;Acc:MG:1277116]                                                                                   |
| ENSMUSG0000000026260 | Ndufa10      | -0.51 | 0.00 | 0.00 | 0.31 | 0.00 | 0.02 | 0.08  | 0.46 | 1.00 | NADH dehydrogenase (ubiquinone) 1 alpha subcomplex, 10 [Source:MGI Symbol;Acc:MG:1914523]                                                 |
| ENSMUSG0000000029556 | Hnf1a        | -0.83 | 0.00 | 0.00 | 0.64 | 0.00 | 0.00 | -0.17 | 0.33 | 1.00 | HNF1 homeobox A [Source:MGI Symbol;Acc:MG:98504]                                                                                          |
| ENSMUSG0000000003246 | Rfx2         | -0.84 | 0.00 | 0.00 | 0.31 | 0.00 | 0.00 | 0.09  | 0.80 | 1.00 | nuclear receptor coactivator 2 [Source:MGI Symbol;Acc:MG:1276533]                                                                         |
| ENSMUSG000000018999  | Slc35b4      | -0.66 | 0.00 | 0.00 | 0.79 | 0.00 | 0.00 | 0.09  | 0.53 | 1.00 | solute carrier family 35, member 84 [Source:MGI Symbol;Acc:MG:1931249]                                                                    |
| ENSMUSG0000000086296 | D030055H07Rk | -0.61 | 0.00 | 0.00 | 0.48 | 0.00 | 0.00 | 0.16  | 0.22 | 1.00 | RIKEN cDNA D030055H07 gene [Source:MGI Symbol;Acc:MG:3605036]                                                                             |
| ENSMUSG000000047787  | Fhl1         | -1.28 | 0.00 | 0.00 | 0.86 | 0.00 | 0.04 | 0.08  | 0.72 | 1.00 | fibronectin leucine rich transmembrane protein 1 [Source:MGI Symbol;Acc:MG:3026647]                                                       |
| ENSMUSG0000000037270 | 4932438A13Rk | -0.79 | 0.00 | 0.00 | 0.53 | 0.00 | 0.02 | -0.06 | 0.82 | 1.00 | RIKEN cDNA 4932438A13 gene [Source:MGI Symbol;Acc:MG:2444631]                                                                             |
| ENSMUSG000000000000  |              | -0.34 | 0.00 | 0.00 | 0.18 | 0.00 | 0.01 | 0.02  | 0.90 | 1.00 | predicted gene 37270 [Source:MGI Symbol;Acc:MG:3650751]                                                                                   |
| ENSMUSG000000003528  | BC021785     | -0.50 | 0.00 | 0.00 | 0.55 | 0.00 | 0.00 | -0.06 | 0.65 | 1.00 |                                                                                                                                           |

|                      |            |       |      |      |      |      |      |       |      |      |                                                                                                                  |                                     |
|----------------------|------------|-------|------|------|------|------|------|-------|------|------|------------------------------------------------------------------------------------------------------------------|-------------------------------------|
| ENSMUSG0000028093    | Acp6       | -0.56 | 0.00 | 0.00 | 0.64 | 0.00 | 0.00 | 0.01  | 1.00 | 1.00 | acid phosphatase 6, lysophosphatidic                                                                             | [Source:MGJ Symbol:Acc:MGJ:1931010] |
| ENSMUSG0000003814    | Calr       | -0.35 | 0.00 | 0.00 | 0.24 | 0.00 | 0.00 | 0.00  | 0.11 | 1.00 | calreticulin                                                                                                     | [Source:MGJ Symbol:Acc:MGJ:88252]   |
| ENSMUSG0000000708    | Kat2b      | -0.62 | 0.00 | 0.00 | 0.51 | 0.00 | 0.03 | 0.16  | 0.32 | 1.00 | K(lysine) acetyltransferase 2B                                                                                   | [Source:MGJ Symbol:Acc:MGJ:1343094] |
| ENSMUSG0000014361    | Merlk      | -0.81 | 0.00 | 0.00 | 0.74 | 0.00 | 0.02 | 0.21  | 0.32 | 1.00 | c-met proto-oncogene tyrosine kinase                                                                             | [Source:MGJ Symbol:Acc:MGJ:66865]   |
| ENSMUSG00000025085   | Abim1      | -0.57 | 0.00 | 0.00 | 0.57 | 0.00 | 0.00 | 0.06  | 0.70 | 1.00 | actin-binding LIM protein 1                                                                                      | [Source:MGJ Symbol:Acc:MGJ:1194500] |
| ENSMUSG0000001436    | Sic19a1    | -0.55 | 0.00 | 0.00 | 0.47 | 0.00 | 0.02 | -0.10 | 0.52 | 1.00 | solute carrier family 19 (folate transporter), member 1                                                          | [Source:MGJ Symbol:Acc:MGJ:103182]  |
| ENSMUSG00000025950   | Ihd1       | -0.32 | 0.00 | 0.00 | 0.64 | 0.00 | 0.00 | -0.02 | 0.82 | 1.00 | isocitrate dehydrogenase 1 (NADP+), soluble                                                                      | [Source:MGJ Symbol:Acc:MGJ:96413]   |
| ENSMUSG00000061742   | Sic22a12   | -0.40 | 0.00 | 0.00 | 0.30 | 0.00 | 0.01 | -0.09 | 0.40 | 1.00 | solute carrier family 22 (organic anion/cation transporter), member 12                                           | [Source:MGJ Symbol:Acc:MGJ:1195269] |
| ENSMUSG00000022356   | Atp5o      | -0.37 | 0.00 | 0.00 | 0.38 | 0.00 | 0.00 | 0.14  | 0.19 | 1.00 | ATP synthase, H+ transporting, mitochondrial F1 complex, O subunit                                               | [Source:MGJ Symbol:Acc:MGJ:106341]  |
| ENSMUSG00000023571   | Fam132a    | -0.63 | 0.00 | 0.00 | 0.74 | 0.00 | 0.00 | 0.00  | 1.00 | 1.00 | family with sequence similarity 132, member A                                                                    | [Source:MGJ Symbol:Acc:MGJ:1914639] |
| ENSMUSG000000042700  | Sipa11l    | -0.52 | 0.00 | 0.00 | 0.56 | 0.00 | 0.00 | -0.02 | 0.90 | 1.00 | signal-induced proliferation-associated 1 like 1                                                                 | [Source:MGJ Symbol:Acc:MGJ:2443679] |
| ENSMUSG000000024120  | Lrpprc     | -0.47 | 0.00 | 0.00 | 0.44 | 0.00 | 0.01 | 0.15  | 0.23 | 1.00 | leucine-rich PPR-motif containing                                                                                | [Source:MGJ Symbol:Acc:MGJ:1919666] |
| ENSMUSG000000029571  | Tmem106b   | -0.33 | 0.00 | 0.00 | 0.51 | 0.00 | 0.00 | 0.13  | 0.19 | 1.00 | transmembrane protein 106B                                                                                       | [Source:MGJ Symbol:Acc:MGJ:1919150] |
| ENSMUSG000000040447  | Spm2       | -0.70 | 0.00 | 0.00 | 0.75 | 0.00 | 0.00 | -0.28 | 0.16 | 1.00 | spinster homolog 2                                                                                               | [Source:MGJ Symbol:Acc:MGJ:2384936] |
| ENSMUSG00000024589   | Nesd4l     | -0.54 | 0.00 | 0.01 | 0.62 | 0.00 | 0.00 | 0.03  | 0.89 | 1.00 | thiopurine methyltransferase                                                                                     | [Source:MGJ Symbol:Acc:MGJ:98812]   |
| ENSMUSG000000035885  | Cox8a      | -0.37 | 0.00 | 0.00 | 0.36 | 0.00 | 0.00 | 0.14  | 0.21 | 1.00 | cytochrome c oxidase, subunit VIIIa                                                                              | [Source:MGJ Symbol:Acc:MGJ:105959]  |
| ENSMUSG000000030769  | Sic5a11    | -0.63 | 0.00 | 0.00 | 0.75 | 0.00 | 0.00 | -0.25 | 0.18 | 1.00 | solute carrier family 5 (sodium/glucose cotransporter), member 11                                                | [Source:MGJ Symbol:Acc:MGJ:1919316] |
| ENSMUSG000000020048  | Hsp90b1    | -0.34 | 0.00 | 0.01 | 0.24 | 0.00 | 0.03 | 0.34  | 0.00 | 0.51 | heat shock protein 90, beta (Grp94), member 1                                                                    | [Source:MGJ Symbol:Acc:MGJ:98817]   |
| ENSMUSG000000061518  | Cox5b      | -0.39 | 0.00 | 0.01 | 0.32 | 0.00 | 0.00 | 0.10  | 0.39 | 1.00 | cytochrome c oxidase, subunit Vb                                                                                 | [Source:MGJ Symbol:Acc:MGJ:88475]   |
| ENSMUSG000000097658  | AL669855.2 | -0.50 | 0.00 | 0.01 | 0.45 | 0.00 | 0.02 | 0.03  | 0.87 | 1.00 | neural precursor cell expressed, developmentally down-regulated gene 4-like                                      | [Source:MGJ Symbol:Acc:MGJ:1933754] |
| ENSMUSG000000018849  | Wwe1       | -0.38 | 0.00 | 0.01 | 0.43 | 0.00 | 0.00 | -0.22 | 0.05 | 1.00 | WW, C2 and coiled-coil domain containing 1                                                                       | [Source:MGJ Symbol:Acc:MGJ:2388637] |
| ENSMUSG000000038890  | Atp5j2     | -0.43 | 0.00 | 0.01 | 0.34 | 0.00 | 0.03 | 0.15  | 0.25 | 1.00 | ATP synthase, H+ transporting, mitochondrial F0 complex, subunit F2                                              | [Source:MGJ Symbol:Acc:MGJ:1927558] |
| ENSMUSG000000038173  | Enpp6      | -0.58 | 0.00 | 0.01 | 0.59 | 0.00 | 0.01 | 0.15  | 0.37 | 1.00 | ectonucleotide pyrophosphatase/phosphodiesterase 6                                                               | [Source:MGJ Symbol:Acc:MGJ:2445171] |
| ENSMUSG000000000876  | Pxmp4      | -0.40 | 0.00 | 0.01 | 0.53 | 0.00 | 0.00 | 0.02  | 0.88 | 1.00 | peroxisomal membrane protein 4                                                                                   | [Source:MGJ Symbol:Acc:MGJ:1891701] |
| ENSMUSG000000034135  | Ski3       | -0.54 | 0.00 | 0.01 | 0.62 | 0.00 | 0.00 | -0.05 | 0.78 | 1.00 | ShK family kinase 3                                                                                              | [Source:MGJ Symbol:Acc:MGJ:2446296] |
| ENSMUSG000000043367  | Sic16a13   | -0.57 | 0.00 | 0.01 | 0.53 | 0.00 | 0.04 | -0.20 | 0.27 | 1.00 | solute carrier family 16 (monocarboxylic acid transporters), member 13                                           | [Source:MGJ Symbol:Acc:MGJ:1916559] |
| ENSMUSG000000031563  | Wwc2       | -0.41 | 0.00 | 0.01 | 0.43 | 0.00 | 0.00 | 0.01  | 0.97 | 1.00 | WW, C2 and coiled-coil domain containing 2                                                                       | [Source:MGJ Symbol:Acc:MGJ:1261872] |
| ENSMUSG000000020572  | Nampt      | -0.37 | 0.00 | 0.01 | 0.38 | 0.00 | 0.01 | 0.13  | 0.28 | 1.00 | nicotinamide phosphoribosyltransferase                                                                           | [Source:MGJ Symbol:Acc:MGJ:1929865] |
| ENSMUSG000000022479  | Vdr        | -0.29 | 0.00 | 0.01 | 0.64 | 0.00 | 0.00 | -0.09 | 0.41 | 1.00 | vitamin D receptor                                                                                               | [Source:MGJ Symbol:Acc:MGJ:103076]  |
| ENSMUSG00000036890   | Aca2       | -0.41 | 0.00 | 0.01 | 0.37 | 0.00 | 0.02 | -0.28 | 0.03 | 1.00 | acetyl-Coenzyme A acyltransferase 2 (mitochondrial 3-oxoacyl-Coenzyme A thiolase)                                | [Source:MGJ Symbol:Acc:MGJ:1098623] |
| ENSMUSG00000030747   | Dgat2      | -0.35 | 0.00 | 0.01 | 0.33 | 0.00 | 0.02 | -0.03 | 0.80 | 1.00 | diacylglycerol O acyltransferase 2                                                                               | [Source:MGJ Symbol:Acc:MGJ:1915050] |
| ENSMUSG0000000062070 | Pgk1       | -0.27 | 0.00 | 0.01 | 0.21 | 0.00 | 0.01 | 0.19  | 0.02 | 1.00 | phosphoglycerate kinase 1                                                                                        | [Source:MGJ Symbol:Acc:MGJ:97555]   |
| ENSMUSG00000002182   | Ddc        | -0.59 | 0.00 | 0.01 | 0.70 | 0.00 | 0.00 | -0.48 | 0.01 | 1.00 | dopa decarboxylase                                                                                               | [Source:MGJ Symbol:Acc:MGJ:94876]   |
| ENSMUSG000000006717  | Acat13     | -0.45 | 0.00 | 0.01 | 0.44 | 0.00 | 0.02 | 0.12  | 0.43 | 1.00 | acyl-CoA thioesterase 13                                                                                         | [Source:MGJ Symbol:Acc:MGJ:1914084] |
| ENSMUSG000000025610  | ORF63      | -0.62 | 0.00 | 0.01 | 0.55 | 0.00 | 0.05 | 0.13  | 0.56 | 1.00 | open reading frame 63                                                                                            | [Source:MGJ Symbol:Acc:MGJ:2446584] |
| ENSMUSG000000070734  | Sic44a4    | -0.40 | 0.00 | 0.01 | 0.47 | 0.00 | 0.00 | 0.05  | 0.71 | 1.00 | solute carrier family 44, member 4                                                                               | [Source:MGJ Symbol:Acc:MGJ:1917379] |
| ENSMUSG000000022450  | Ndufa6     | -0.38 | 0.00 | 0.01 | 0.35 | 0.00 | 0.02 | 0.16  | 0.18 | 1.00 | NADH dehydrogenase (ubiquinone) 1 alpha subcomplex, 6 (B14)                                                      | [Source:MGJ Symbol:Acc:MGJ:1914380] |
| ENSMUSG000000059534  | Uqc1r10    | -0.41 | 0.00 | 0.01 | 0.34 | 0.00 | 0.01 | 0.16  | 0.23 | 1.00 | ubiquinol-cytochrome c reductase, complex III subunit X                                                          | [Source:MGJ Symbol:Acc:MGJ:1913402] |
| ENSMUSG000000025207  | Sema4g     | -0.41 | 0.00 | 0.01 | 0.56 | 0.00 | 0.00 | -0.20 | 0.16 | 1.00 | sema domain, immunoglobulin domain (Ig), transmembrane domain (TM) and short cytoplasmic domain, (semaphorin) 4G | [Source:MGJ Symbol:Acc:MGJ:1347047] |
| ENSMUSG000000021520  | Uqc1rb     | -0.38 | 0.00 | 0.01 | 0.31 | 0.00 | 0.04 | 0.19  | 0.12 | 1.00 | ubiquinol-cytochrome c reductase binding protein                                                                 | [Source:MGJ Symbol:Acc:MGJ:1914780] |
| ENSMUSG00000017688   | Hnf4g      | -1.11 | 0.00 | 0.01 | 1.19 | 0.00 | 0.01 | 0.14  | 0.69 | 1.00 | hepatocyte nuclear factor 4, gamma                                                                               | [Source:MGJ Symbol:Acc:MGJ:1353604] |
| ENSMUSG000000018796  | Acat1      | -0.39 | 0.00 | 0.01 | 0.35 | 0.00 | 0.03 | -0.53 | 0.00 | 0.08 | acyl-CoA synthetase long-chain family member 1                                                                   | [Source:MGJ Symbol:Acc:MGJ:102797]  |
| ENSMUSG000000059173  | Pde1a      | -0.46 | 0.00 | 0.01 | 0.60 | 0.00 | 0.00 | -0.08 | 0.61 | 1.00 | phosphodiesterase 1A, calmodulin-dependent                                                                       | [Source:MGJ Symbol:Acc:MGJ:1201792] |
| ENSMUSG000000027610  | Gss        | -0.25 | 0.00 | 0.02 | 0.25 | 0.00 | 0.00 | 0.21  | 0.02 | 1.00 | glutathione synthetase                                                                                           | [Source:MGJ Symbol:Acc:MGJ:95852]   |
| ENSMUSG000000028559  | Osbp19     | -0.34 | 0.00 | 0.02 | 0.41 | 0.00 | 0.00 | 0.02  | 0.90 | 1.00 | oxysterol binding protein-like 9                                                                                 | [Source:MGJ Symbol:Acc:MGJ:1923784] |
| ENSMUSG000000027598  | Ich        | -0.42 | 0.00 | 0.02 | 0.55 | 0.00 | 0.00 | 0.07  | 0.61 | 1.00 | itchy, E3 ubiquitin protein ligase                                                                               | [Source:MGJ Symbol:Acc:MGJ:1202301] |
| ENSMUSG000000044249  | Dalb29     | -0.60 | 0.00 | 0.02 | 0.63 | 0.00 | 0.02 | 0.22  | 0.26 | 1.00 | defensin beta 29                                                                                                 | [Source:MGJ Symbol:Acc:MGJ:1922650] |
| ENSMUSG000000027893  | Ahcy11     | -0.29 | 0.00 | 0.02 | 0.28 | 0.00 | 0.02 | 0.13  | 0.19 | 1.00 | S-adenosylhomocysteine hydrolase-like 1                                                                          | [Source:MGJ Symbol:Acc:MGJ:2385184] |
| ENSMUSG000000038060  | Dlec1      | -0.40 | 0.00 | 0.02 | 0.46 | 0.00 | 0.00 | 0.00  | 1.00 | 1.00 | deleted in lung and esophageal cancer 1                                                                          | [Source:MGJ Symbol:Acc:MGJ:2443671] |
| ENSMUSG000000022354  | Ndufb9     | -0.30 | 0.00 | 0.03 | 0.29 | 0.00 | 0.01 | 0.15  | 0.16 | 1.00 | NADH dehydrogenase (ubiquinone) 1 beta subcomplex, 9                                                             | [Source:MGJ Symbol:Acc:MGJ:1913468] |
| ENSMUSG000000034613  | Ppm1h      | -0.58 | 0.00 | 0.03 | 0.67 | 0.00 | 0.01 | -0.22 | 0.28 | 1.00 | protein phosphatase 1H (PP2C domain containing)                                                                  | [Source:MGJ Symbol:Acc:MGJ:2442087] |
| ENSMUSG000000038170  | Pde4dp     | -0.34 | 0.00 | 0.03 | 0.40 | 0.00 | 0.01 | 0.11  | 0.41 | 1.00 | phosphodiesterase 4D interacting protein (myomegalin)                                                            | [Source:MGJ Symbol:Acc:MGJ:1891434] |
| ENSMUSG000000045636  | Mnut1      | -0.39 | 0.00 | 0.03 | 0.38 | 0.00 | 0.03 | 0.16  | 0.28 | 1.00 | mitochondrial tumor suppressor 1                                                                                 | [Source:MGJ Symbol:Acc:MGJ:2142572] |
| ENSMUSG000000058655  | Eif4b      | -0.24 | 0.01 | 0.04 | 0.22 | 0.00 | 0.04 | 0.02  | 0.88 | 1.00 | eukaryotic translation initiation factor 4B                                                                      | [Source:MGJ Symbol:Acc:MGJ:95304]   |
| ENSMUSG000000027775  | Mfsd1      | -0.25 | 0.01 | 0.04 | 0.26 | 0.00 | 0.02 | -0.03 | 0.79 | 1.00 | major facilitator superfamily domain containing 1                                                                | [Source:MGJ Symbol:Acc:MGJ:1914118] |
| ENSMUSG000000040209  | Zfp704     | -0.47 | 0.01 | 0.04 | 0.73 | 0.00 | 0.00 | -0.13 | 0.49 | 1.00 | zinc finger protein 704                                                                                          | [Source:MGJ Symbol:Acc:MGJ:2180715] |
| ENSMUSG000000040170  | Fmo2       | -0.23 | 0.01 | 0.04 | 0.19 | 0.00 | 0.03 | -0.19 | 0.11 | 1.00 | flavin containing monooxygenase 2                                                                                | [Source:MGJ Symbol:Acc:MGJ:1916776] |
| ENSMUSG000000029273  | Sulf1a1    | -0.50 | 0.01 | 0.04 | 0.81 | 0.00 | 0.00 | 0.31  | 0.00 | 0.56 | sulfotransferase family 1D, member 1                                                                             | [Source:MGJ Symbol:Acc:MGJ:1928341] |
| ENSMUSG000000078566  | Bnip3      | -0.31 | 0.01 | 0.05 | 0.41 | 0.00 | 0.00 | 0.02  | 0.87 | 1.00 | BCL2/adenovirus E1B interacting protein 3                                                                        | [Source:MGJ Symbol:Acc:MGJ:109326]  |

Sup. Table 1 SET VII

| ENSEMBL             | Symbol        | CP versus Sal |        |      | CP versus CP+DCA |        |      | DCA versus Sal |        |      | Desc                                                                                                  |
|---------------------|---------------|---------------|--------|------|------------------|--------|------|----------------|--------|------|-------------------------------------------------------------------------------------------------------|
|                     |               | logFC         | PValue | FDR  | logFC            | PValue | FDR  | logFC          | PValue | FDR  |                                                                                                       |
| ENSMUSG0000001773   | Folh1         | -0.36         | 0.03   | 0.17 | 1.29             | 0.00   | 0.00 | -0.10          | 0.57   | 1.00 | folate hydrolase 1 [Source:MG Symbol;Acc:MG:1858193]                                                  |
| ENSMUSG00000028692  | Akr1a1        | -0.11         | 0.09   | 0.38 | 0.38             | 0.00   | 0.00 | -0.05          | 0.49   | 1.00 | aldo-keto reductase family 1, member A1 (aldehyde reductase) [Source:MG Symbol;Acc:MG:1929955]        |
| ENSMUSG00000060317  | Acat2         | 0.34          | 0.06   | 0.30 | 0.92             | 0.00   | 0.00 | -0.19          | 0.29   | 1.00 | acyl-coenzyme A amino acid N-acyltransferase 2 [Source:MG Symbol;Acc:MG:2444345]                      |
| ENSMUSG00000021185  | 9030617003Rik | 0.64          | 0.00   | 0.00 | 0.61             | 0.00   | 0.00 | 0.27           | 0.03   | 1.00 | RIKEN cDNA 9030617003 gene [Source:MG Symbol;Acc:MG:2444843]                                          |
| ENSMUSG00000004610  | Eflb          | -0.24         | 0.02   | 0.13 | 0.48             | 0.00   | 0.00 | 0.16           | 0.14   | 1.00 | electron transferring flavoprotein, beta polypeptide [Source:MG Symbol;Acc:MG:106098]                 |
| ENSMUSG00000039648  | Cctb1         | -0.34         | 0.02   | 0.11 | 0.75             | 0.00   | 0.00 | 0.30           | 0.02   | 1.00 | cysteine conjugate-beta lyase 1 [Source:MG Symbol;Acc:MG:1917516]                                     |
| ENSMUSG00000021612  | Slc6a18       | -0.22         | 0.02   | 0.12 | 0.52             | 0.00   | 0.00 | 0.00           | 0.97   | 1.00 | solute carrier family 6 (neurotransmitter transporter), member 18 [Source:MG Symbol;Acc:MG:1336892]   |
| ENSMUSG00000020839  | Tmidg1        | 0.17          | 0.11   | 0.45 | 0.49             | 0.00   | 0.00 | 0.52           | 0.00   | 0.00 | transmembrane and immunoglobulin domain containing 1 [Source:MG Symbol;Acc:MG:1913851]                |
| ENSMUSG00000024503  | Spink3        | -0.14         | 0.30   | 0.88 | 0.50             | 0.00   | 0.00 | 0.21           | 0.11   | 1.00 | serine peptidase inhibitor, Kazal type 3 [Source:MG Symbol;Acc:MG:106202]                             |
| ENSMUSG00000023120  | Gm853         | -0.32         | 0.06   | 0.28 | 0.83             | 0.00   | 0.00 | 0.48           | 0.00   | 1.00 | predicted gene 853 [Source:MG Symbol;Acc:MG:2685699]                                                  |
| ENSMUSG00000010651  | Acaa1b        | 0.25          | 0.00   | 0.02 | 0.37             | 0.00   | 0.00 | -0.16          | 0.11   | 1.00 | acetyl-Coenzyme A acyltransferase 1B [Source:MG Symbol;Acc:MG:3605455]                                |
| ENSMUSG00000029700  | Slc13a1       | 0.97          | 0.00   | 0.00 | 0.69             | 0.00   | 0.00 | -0.02          | 0.86   | 1.00 | solute carrier family 13 (sodium/sulfate symporters), member 1 [Source:MG Symbol;Acc:MG:1859937]      |
| ENSMUSG00000027698  | Nceh1         | -0.26         | 0.01   | 0.07 | 0.44             | 0.00   | 0.00 | 0.29           | 0.01   | 1.00 | arylacetamide deacetylase-like 1 [Source:MG Symbol;Acc:MG:2443191]                                    |
| ENSMUSG00000022108  | Ihm2b         | -0.02         | 0.76   | 1.00 | 0.27             | 0.00   | 0.00 | -0.01          | 0.94   | 1.00 | integral membrane protein 2B [Source:MG Symbol;Acc:MG:1309517]                                        |
| ENSMUSG00000038567  | Cyp24a1       | 0.81          | 0.01   | 0.06 | 0.82             | 0.00   | 0.00 | -1.11          | 0.00   | 0.56 | cytochrome P450, family 24, subfamily a, polypeptide 1 [Source:MG Symbol;Acc:MG:88593]                |
| ENSMUSG00000035898  | Ech1          | -0.31         | 0.01   | 0.07 | 0.50             | 0.00   | 0.00 | 0.03           | 0.80   | 1.00 | enoyl coenzyme A hydratase 1, peroxisomal [Source:MG Symbol;Acc:MG:1858208]                           |
| ENSMUSG00000026568  | Mpc2          | -0.27         | 0.01   | 0.08 | 0.43             | 0.00   | 0.00 | 0.14           | 0.22   | 1.00 | mitochondrial pyruvate carrier 2 [Source:MG Symbol;Acc:MG:1917706]                                    |
| ENSMUSG00000028088  | Fmo5          | -0.30         | 0.03   | 0.15 | 0.61             | 0.00   | 0.00 | 0.35           | 0.01   | 1.00 | flavin containing monooxygenase 5 [Source:MG Symbol;Acc:MG:1310004]                                   |
| ENSMUSG00000034903  | Cobl1         | -0.17         | 0.16   | 0.59 | 0.52             | 0.00   | 0.00 | 0.04           | 0.76   | 1.00 | Cobl-like 1 [Source:MG Symbol;Acc:MG:2442894]                                                         |
| ENSMUSG00000028639  | Ybx1          | -0.19         | 0.02   | 0.11 | 0.27             | 0.00   | 0.00 | 0.23           | 0.03   | 1.00 | Y box protein 1 [Source:MG Symbol;Acc:MG:99146]                                                       |
| ENSMUSG00000028545  | Bend5         | -0.50         | 0.01   | 0.09 | 0.92             | 0.00   | 0.00 | 0.03           | 0.95   | 1.00 | BEIN domain containing 5 [Source:MG Symbol;Acc:MG:1914871]                                            |
| ENSMUSG00000023829  | Slc22a1       | -0.18         | 0.04   | 0.19 | 0.36             | 0.00   | 0.00 | 0.00           | 0.99   | 1.00 | solute carrier family 22 (organic cation transporter), member 1 [Source:MG Symbol;Acc:MG:108111]      |
| ENSMUSG00000022562  | Oplah         | 0.22          | 0.02   | 0.11 | 0.38             | 0.00   | 0.00 | 0.17           | 0.10   | 1.00 | 5-oxoprolinase (ATP-hydrolysing) [Source:MG Symbol;Acc:MG:1922725]                                    |
| ENSMUSG00000001986  | Gria3         | -0.63         | 0.03   | 0.17 | 1.22             | 0.00   | 0.00 | 0.10           | 0.73   | 1.00 | glutamate receptor, ionotropic, AMPA3 (alpha 3) [Source:MG Symbol;Acc:MG:95810]                       |
| ENSMUSG00000001604  | Tcea3         | -0.23         | 0.26   | 0.79 | 0.81             | 0.00   | 0.00 | 0.15           | 0.45   | 1.00 | transcription elongation factor A (SII), 3 [Source:MG Symbol;Acc:MG:1196908]                          |
| ENSMUSG000000045629 | Sh3ac2        | 0.45          | 0.01   | 0.07 | 0.70             | 0.00   | 0.00 | 0.18           | 0.37   | 1.00 | SH3 domain and tetratricopeptide repeats 2 [Source:MG Symbol;Acc:MG:2444417]                          |
| ENSMUSG000000064373 | Sepp1         | -0.08         | 0.33   | 0.94 | 0.31             | 0.00   | 0.00 | 0.27           | 0.00   | 0.93 | selenoprotein P, plasma, 1 [Source:MG Symbol;Acc:MG:894288]                                           |
| ENSMUSG00000009772  | Nuak2         | -0.20         | 0.19   | 0.65 | 0.63             | 0.00   | 0.00 | 0.02           | 0.96   | 1.00 | NUAK family, SNF1-like kinase, 2 [Source:MG Symbol;Acc:MG:1921387]                                    |
| ENSMUSG00000035863  | Palm          | 0.00          | 1.00   | 1.00 | 0.52             | 0.00   | 0.00 | 0.01           | 0.97   | 1.00 | paralemmin [Source:MG Symbol;Acc:MG:1261814]                                                          |
| ENSMUSG000000032324 | Tspan3        | -0.13         | 0.22   | 0.71 | 0.39             | 0.00   | 0.00 | 0.11           | 0.29   | 1.00 | tetraspanin 3 [Source:MG Symbol;Acc:MG:1928098]                                                       |
| ENSMUSG000000060126 | Tpt1          | -0.10         | 0.21   | 0.71 | 0.16             | 0.00   | 0.00 | 0.06           | 0.52   | 1.00 | tumor protein, translationally-controlled 1 [Source:MG Symbol;Acc:MG:104890]                          |
| ENSMUSG000000031700 | Gpt2          | -0.19         | 0.24   | 0.77 | 0.60             | 0.00   | 0.00 | 0.12           | 0.48   | 1.00 | glutamic pyruvate transaminase (alanine aminotransferase) 2 [Source:MG Symbol;Acc:MG:1915391]         |
| ENSMUSG000000020225 | Tmbim4        | -0.06         | 0.53   | 1.00 | 0.31             | 0.00   | 0.00 | 0.12           | 0.25   | 1.00 | transmembrane BAX inhibitor motif containing 4 [Source:MG Symbol;Acc:MG:1915462]                      |
| ENSMUSG000000026380 | Ttcp2b1       | -0.21         | 0.02   | 0.10 | 0.33             | 0.00   | 0.00 | 0.04           | 0.66   | 1.00 | transcription factor CP2-like 1 [Source:MG Symbol;Acc:MG:2444691]                                     |
| ENSMUSG000000028223 | Decr1         | -0.08         | 0.52   | 1.00 | 0.43             | 0.00   | 0.00 | 0.16           | 0.18   | 1.00 | 2,4-dienoyl CoA reductase 1, mitochondrial [Source:MG Symbol;Acc:MG:1914710]                          |
| ENSMUSG000000063450 | Syne2         | -0.26         | 0.02   | 0.14 | 0.41             | 0.00   | 0.00 | 0.25           | 0.03   | 1.00 | synaptic nuclear envelope 2 [Source:MG Symbol;Acc:MG:2449316]                                         |
| ENSMUSG00000023031  | Cela1         | -0.40         | 0.02   | 0.11 | 0.66             | 0.00   | 0.00 | -0.25          | 0.18   | 1.00 | chymotrypsin-like elastase family, member 1 [Source:MG Symbol;Acc:MG:95314]                           |
| ENSMUSG00000022263  | Trio          | -0.20         | 0.24   | 0.76 | 0.60             | 0.00   | 0.00 | 0.03           | 0.92   | 1.00 | triple functional domain (PTPRF interacting) [Source:MG Symbol;Acc:MG:1922730]                        |
| ENSMUSG00000024694  | Keg1          | -0.22         | 0.20   | 0.68 | 0.41             | 0.00   | 0.00 | 0.18           | 0.37   | 1.00 | kidney expressed gene 1 [Source:MG Symbol;Acc:MG:1928492]                                             |
| ENSMUSG000000064341 | mt-Nd1        | 0.15          | 0.01   | 0.06 | 0.20             | 0.00   | 0.00 | 0.23           | 0.00   | 0.00 | mitochondrially encoded NADH dehydrogenase 1 [Source:MG Symbol;Acc:MG:101787]                         |
| ENSMUSG00000023122  | Sult1c2       | -0.24         | 0.02   | 0.13 | 0.36             | 0.00   | 0.00 | -0.21          | 0.07   | 1.00 | sulfotransferase family, cytosolic, 1C, member 2 [Source:MG Symbol;Acc:MG:1916333]                    |
| ENSMUSG00000015243  | Absca1        | 0.09          | 0.66   | 1.00 | 0.65             | 0.00   | 0.00 | -0.53          | 0.02   | 1.00 | ATP-binding cassette, sub-family A (ABC1), member 1 [Source:MG Symbol;Acc:MG:99607]                   |
| ENSMUSG000000031373 | Carb5         | -0.23         | 0.13   | 0.50 | 0.54             | 0.00   | 0.00 | 0.05           | 0.79   | 1.00 | carbonic anhydrase 5b, mitochondrial [Source:MG Symbol;Acc:MG:1926249]                                |
| ENSMUSG00000026638  | Irf6          | 0.16          | 0.11   | 0.45 | 0.33             | 0.00   | 0.00 | 0.16           | 0.16   | 1.00 | interferon regulatory factor 6 [Source:MG Symbol;Acc:MG:1859211]                                      |
| ENSMUSG000000031451 | Gas6          | 0.34          | 0.00   | 0.00 | 0.28             | 0.00   | 0.00 | -0.26          | 0.01   | 1.00 | growth arrest specific 6 [Source:MG Symbol;Acc:MG:95860]                                              |
| ENSMUSG000000030688 | Start10       | 0.14          | 0.10   | 0.42 | 0.25             | 0.00   | 0.00 | 0.03           | 0.80   | 1.00 | START domain containing 10 [Source:MG Symbol;Acc:MG:1860093]                                          |
| ENSMUSG00000024827  | Gldc          | -0.19         | 0.37   | 1.00 | 0.65             | 0.00   | 0.00 | 0.19           | 0.33   | 1.00 | glycine decarboxylase [Source:MG Symbol;Acc:MG:1341155]                                               |
| ENSMUSG00000001999  | Bilvr4        | -0.08         | 0.58   | 1.00 | 0.49             | 0.00   | 0.00 | 0.05           | 0.80   | 1.00 | biliverdin reductase A [Source:MG Symbol;Acc:MG:88170]                                                |
| ENSMUSG000000055320 | Tead1         | -0.29         | 0.07   | 0.31 | 0.54             | 0.00   | 0.00 | 0.11           | 0.50   | 1.00 | TEA domain family member 1 [Source:MG Symbol;Acc:MG:101876]                                           |
| ENSMUSG00000030674  | Oprl          | -0.35         | 0.03   | 0.16 | 0.56             | 0.00   | 0.00 | -0.10          | 0.59   | 1.00 | quinolinate phosphoribosyltransferase [Source:MG Symbol;Acc:MG:1914625]                               |
| ENSMUSG00000026971  | Ilgb6         | -0.21         | 0.12   | 0.47 | 0.43             | 0.00   | 0.00 | 0.05           | 0.78   | 1.00 | integrin beta 6 [Source:MG Symbol;Acc:MG:96615]                                                       |
| ENSMUSG000000078350 | 1190007F08Rik | 0.30          | 0.03   | 0.17 | 0.49             | 0.00   | 0.00 | 0.00           | 1.00   | 1.00 | RIKEN cDNA 1190007F08 gene [Source:MG Symbol;Acc:MG:1916109]                                          |
| ENSMUSG00000050064  | Zfp697        | -0.41         | 0.04   | 0.20 | 0.70             | 0.00   | 0.00 | -0.15          | 0.50   | 1.00 | zinc finger protein 697 [Source:MG Symbol;Acc:MG:2139736]                                             |
| ENSMUSG000000074639 | BC089597      | 0.09          | 0.63   | 1.00 | 0.47             | 0.00   | 0.00 | -0.57          | 0.00   | 0.52 | cDNA sequence BC089597 [Source:MG Symbol;Acc:MG:3583955]                                              |
| ENSMUSG00000029192  | Tbc1d14       | -0.10         | 0.53   | 1.00 | 0.49             | 0.00   | 0.00 | -0.15          | 0.38   | 1.00 | TBC1 domain family, member 14 [Source:MG Symbol;Acc:MG:1098708]                                       |
| ENSMUSG000000063229 | Ldha          | -0.16         | 0.04   | 0.19 | 0.24             | 0.00   | 0.00 | 0.10           | 0.20   | 1.00 | lactate dehydrogenase A [Source:MG Symbol;Acc:MG:96759]                                               |
| ENSMUSG00000024222  | Fkbp5         | 0.15          | 0.49   | 1.00 | 0.61             | 0.00   | 0.00 | 0.25           | 0.26   | 1.00 | FK506 binding protein 5 [Source:MG Symbol;Acc:MG:104670]                                              |
| ENSMUSG000000070493 | Chchd2        | -0.19         | 0.04   | 0.20 | 0.22             | 0.00   | 0.01 | 0.12           | 0.21   | 1.00 | coiled-coil-helix-coiled-coil-helix domain containing 2 [Source:MG Symbol;Acc:MG:1261428]             |
| ENSMUSG00000037972  | Snn           | -0.33         | 0.02   | 0.11 | 0.46             | 0.00   | 0.01 | -0.06          | 0.75   | 1.00 | stannin [Source:MG Symbol;Acc:MG:1278549]                                                             |
| ENSMUSG00000021884  | Had1          | 0.28          | 0.12   | 0.48 | 0.55             | 0.00   | 0.01 | -0.16          | 0.45   | 1.00 | 2-hydroxyacyl-CoA lyase 1 [Source:MG Symbol;Acc:MG:1929657]                                           |
| ENSMUSG00000025075  | Habp2         | -0.27         | 0.03   | 0.15 | 0.41             | 0.00   | 0.01 | -0.14          | 0.32   | 1.00 | hyaluronic acid binding protein 2 [Source:MG Symbol;Acc:MG:1196378]                                   |
| ENSMUSG000000033022 | Cdo1          | -0.26         | 0.04   | 0.20 | 0.41             | 0.00   | 0.01 | 0.21           | 0.11   | 1.00 | cysteine dioxygenase 1, cytosolic [Source:MG Symbol;Acc:MG:105925]                                    |
| ENSMUSG000000036138 | Acaa1a        | -0.08         | 0.38   | 1.00 | 0.29             | 0.00   | 0.01 | -0.20          | 0.06   | 1.00 | acetyl-Coenzyme A acyltransferase 1A [Source:MG Symbol;Acc:MG:2148491]                                |
| ENSMUSG00000022437  | Samn50        | -0.26         | 0.02   | 0.13 | 0.36             | 0.00   | 0.01 | 0.13           | 0.29   | 1.00 | sorting and assembly machinery component 50 homolog (S. cerevisiae) [Source:MG Symbol;Acc:MG:1915903] |
| ENSMUSG000000039081 | Zfp503        | -0.35         | 0.01   | 0.09 | 0.47             | 0.00   | 0.01 | -0.05          | 0.75   | 1.00 | zinc finger protein 503 [Source:MG Symbol;Acc:MG:1353644]                                             |
| ENSMUSG000000034994 | Eef2          | -0.06         | 0.21   | 0.69 | 0.13             | 0.00   | 0.01 | 0.09           | 0.19   | 1.00 | eukaryotic translation elongation factor 2 [Source:MG Symbol;Acc:MG:95288]                            |
| ENSMUSG000000041697 | Cox6a1        | -0.09         | 0.36   | 1.00 | 0.24             | 0.00   | 0.01 | 0.17           | 0.11   | 1.00 | cytochrome c oxidase, subunit VI a, polypeptide 1 [Source:MG Symbol;Acc:MG:103099]                    |
| ENSMUSG00000025534  | Gusb          | 0.15          | 0.31   | 0.91 | 0.51             | 0.00   | 0.01 | 0.92           | 0.00   | 0.00 | glucuronidase, beta [Source:MG Symbol;Acc:MG:95872]                                                   |
| ENSMUSG000000031788 | Kifc3         | 0.42          | 0.00   | 0.00 | 0.32             | 0.00   | 0.01 | -0.09          | 0.48   | 1.00 | kinesin family member C3 [Source:MG Symbol;Acc:MG:109202]                                             |
| ENSMUSG00000024924  | Vldlr         | 0.03          | 0.81   | 1.00 | 0.37             | 0.00   | 0.01 | 0.07           | 0.58   | 1.00 | very low density lipoprotein receptor [Source:MG Symbol;Acc:MG:98935]                                 |
| ENSMUSG000000037440 | Vnn1          | 0.74          | 0.00   | 0.00 | 0.48             | 0.00   | 0.01 | -0.21          | 0.29   | 1.00 | vanin 1 [Source:MG Symbol;Acc:MG:108395]                                                              |
| ENSMUSG000000063856 | Gpx1          | 0.10          | 0.25   | 0.78 | 0.23             | 0.00   | 0.01 | 0.11           | 0.27   | 1.00 | glutathione peroxidase 1 [Source:MG Symbol;Acc:MG:104887]                                             |
| ENSMUSG000000018574 | Aacdvl        | 0.03          | 0.78   | 1.00 | 0.27             | 0.00   | 0.01 | 0.04           | 0.65   | 1.00 | acyl-Coenzyme A dehydrogenase, very long chain [Source:MG Symbol;Acc:MG:895149]                       |
| ENSMUSG000000018501 | Ncor1         | -0.25         | 0.02   | 0.12 | 0.34             | 0.00   | 0.01 | 0.08           | 0.50   | 1.00 | nuclear receptor co-repressor 1 [Source:MG Symbol;Acc:MG:1349717]                                     |
| ENSMUSG000000000594 | Gm2a          | -0.18         | 0.10   | 0.43 | 0.32             | 0.00   | 0.01 | 0.02           | 0.90   | 1.00 | Gm2 ganglioside activator protein [Source:MG Symbol;Acc:MG:1916348]                                   |
| ENSMUSG000000055866 | Per2          | -0.19         | 0.37   | 1.00 | 0.64             | 0.00   | 0.01 | 0.54           | 0.01   |      |                                                                                                       |

|                            |       |      |      |      |      |      |      |      |      |                                                                              |
|----------------------------|-------|------|------|------|------|------|------|------|------|------------------------------------------------------------------------------|
| ENSMUSG00000070780 Rbm47   | -0.29 | 0.01 | 0.08 | 0.32 | 0.00 | 0.04 | 0.33 | 0.01 | 1.00 | RNA binding motif protein 47 [Source:MGI Symbol;Acc:MGI:2384294]             |
| ENSMUSG00000021214 Akr1c18 | 0.02  | 0.93 | 1.00 | 0.39 | 0.00 | 0.04 | 0.27 | 0.10 | 1.00 | aldo-keto reductase family 1, member C18 [Source:MGI Symbol;Acc:MGI:2145420] |
| ENSMUSG00000035877 Zfx3    | -0.38 | 0.01 | 0.08 | 0.43 | 0.00 | 0.04 | 0.17 | 0.29 | 1.00 | zinc fingers and homeoboxes 3 [Source:MGI Symbol;Acc:MGI:2444772]            |
| ENSMUSG00000021709 Erb2ip  | -0.02 | 0.88 | 1.00 | 0.26 | 0.00 | 0.05 | 0.10 | 0.38 | 1.00 | Erb2 interacting protein [Source:MGI Symbol;Acc:MGI:1890169]                 |
| ENSMUSG00000023830 Igf2r   | -0.16 | 0.22 | 0.71 | 0.34 | 0.00 | 0.05 | 0.09 | 0.52 | 1.00 | insulin-like growth factor 2 receptor [Source:MGI Symbol;Acc:MGI:96435]      |

Sup. Table 1 SET VIII

| ENSEMBL            | Symbol        | CP versus Sal |        |      | CP versus CP+DCA |        |      | DCA versus Sal |         |       | Desc                                                                                                        |
|--------------------|---------------|---------------|--------|------|------------------|--------|------|----------------|---------|-------|-------------------------------------------------------------------------------------------------------------|
|                    |               | logFC         | PValue | FDR  | logFC            | PValue | FDR  | logFC          | PValue  | FDR   |                                                                                                             |
| ENSMUSG00000064354 | mt-Co2        | -0.41         | 0.00   | 0.00 | 0.14             | 0.00   | 0.01 | 0.17           | 3.9E-05 | 0.034 | mitochondrially encoded cytochrome c oxidase II [Source:MGI Symbol;Acc:MGI:102503]                          |
| ENSMUSG00000064345 | mt-Nd2        | -0.45         | 0.00   | 0.00 | 0.21             | 0.00   | 0.00 | 0.22           | 3.8E-06 | 0.005 | mitochondrially encoded NADH dehydrogenase 2 [Source:MGI Symbol;Acc:MGI:102500]                             |
| ENSMUSG00000064341 | mt-Nd1        | -0.15         | 0.01   | 0.06 | 0.20             | 0.00   | 0.00 | 0.23           | 4.3E-08 | 0.000 | mitochondrially encoded NADH dehydrogenase 1 [Source:MGI Symbol;Acc:MGI:101787]                             |
| ENSMUSG00000031441 | Atp11a        | -2.25         | 0.00   | 0.00 | 0.85             | 0.00   | 0.00 | 0.36           | 1.1E-06 | 0.002 | ATPase, class VI, type 11A [Source:MGI Symbol;Acc:MGI:1354735]                                              |
| ENSMUSG00000002944 | Cd36          | -1.24         | 0.00   | 0.00 | 0.73             | 0.00   | 0.00 | 0.46           | 1.5E-06 | 0.002 | CD36 antigen [Source:MGI Symbol;Acc:MGI:107899]                                                             |
| ENSMUSG00000020839 | Tmigd1        | 0.17          | 0.11   | 0.45 | 0.49             | 0.00   | 0.00 | 0.52           | 3.3E-06 | 0.005 | transmembrane and immunoglobulin domain containing 1 [Source:MGI Symbol;Acc:MGI:1913851]                    |
| ENSMUSG00000042410 | Agps          | -1.32         | 0.00   | 0.00 | 0.36             | 0.00   | 0.01 | 0.54           | 1.2E-06 | 0.002 | alkylglycerone phosphate synthase [Source:MGI Symbol;Acc:MGI:2443065]                                       |
| ENSMUSG00000041698 | Slco1a1       | -1.59         | 0.00   | 0.00 | 0.90             | 0.00   | 0.00 | 0.59           | 6.1E-06 | 0.007 | solute carrier organic anion transporter family, member 1a1 [Source:MGI Symbol;Acc:MGI:1351891]             |
| ENSMUSG00000034875 | Nudt19        | -1.44         | 0.00   | 0.00 | 0.58             | 0.00   | 0.00 | 0.66           | 1.0E-05 | 0.011 | nudix (nucleoside diphosphate linked moiety X)-type motif 19 [Source:MGI Symbol;Acc:MGI:94203]              |
| ENSMUSG00000092341 | Malat1        | 1.09          | 0.00   | 0.00 | -0.11            | 0.20   | 1.00 | 0.66           | 2.8E-16 | 0.000 | metastasis associated lung adenocarcinoma transcript 1 (non-coding RNA) [Source:MGI Symbol;Acc:MGI:1919539] |
| ENSMUSG00000097509 | B230322F03RIK | -1.31         | 0.00   | 0.00 | 0.51             | 0.00   | 0.05 | 0.68           | 9.8E-06 | 0.011 | MCG147051 [Source:UniProtKB/TrEMBL;Acc:Q8BR17]                                                              |
| ENSMUSG00000080950 | Gm7278        | -0.40         | 0.11   | 0.45 | 0.09             | 0.73   | 1.00 | 0.85           | 5.0E-05 | 0.041 | predicted gene 7278 [Source:MGI Symbol;Acc:MGI:3645261]                                                     |
| ENSMUSG00000030929 | Eri2          | -1.77         | 0.00   | 0.00 | 0.88             | 0.00   | 0.00 | 0.87           | 7.0E-13 | 0.000 | exoribonuclease 2 [Source:MGI Symbol;Acc:MGI:1918401]                                                       |
| ENSMUSG00000030935 | Acsm3         | -1.98         | 0.00   | 0.00 | 0.96             | 0.00   | 0.00 | 0.89           | 1.4E-13 | 0.000 | acyl-CoA synthetase medium-chain family member 3 [Source:MGI Symbol;Acc:MGI:99538]                          |
| ENSMUSG00000011179 | Odc1          | -0.39         | 0.01   | 0.06 | 0.10             | 0.17   | 1.00 | 0.89           | 2.6E-07 | 0.001 | ornithine decarboxylase, structural 1 [Source:MGI Symbol;Acc:MGI:97402]                                     |
| ENSMUSG00000021670 | Hmgcr         | 0.17          | 0.37   | 1.00 | -0.05            | 0.77   | 1.00 | 0.90           | 4.9E-06 | 0.006 | 3-hydroxy-3-methylglutaryl-Coenzyme A reductase [Source:MGI Symbol;Acc:MGI:96159]                           |
| ENSMUSG00000025534 | Gusb          | 0.15          | 0.31   | 0.91 | 0.51             | 0.00   | 0.01 | 0.92           | 7.3E-09 | 0.000 | glucuronidase, beta [Source:MGI Symbol;Acc:MGI:95872]                                                       |
| ENSMUSG00000080845 | Gm9115        | -0.41         | 0.15   | 0.54 | 0.09             | 0.78   | 1.00 | 0.94           | 3.1E-05 | 0.030 | predicted gene 9115 [Source:MGI Symbol;Acc:MGI:3648181]                                                     |
| ENSMUSG00000074715 | Ccl28         | -0.03         | 0.94   | 1.00 | 0.99             | 0.00   | 0.02 | 1.40           | 1.7E-12 | 0.000 | chemokine (C-C motif) ligand 28 [Source:MGI Symbol;Acc:MGI:1861731]                                         |



**Supplementary Table 2. Significantly enriched Gene Ontology and KEGG pathways derived from genes sets defined in Figure 6.** Count, number of genes in gene set present in GO group; %, percent of genes in gene set present in GO group; P Value: comparison of gene set to population (all mouse genes)  $P < 0.05$  cut-off; Fold Enrichment: proportion of the GO group in the gene set compared to the population (all mouse genes), FDR: false discovery rate, the probability that a gene set represents a false positive finding.  $FDR < 0.25$  cut-off (gene set likely to be genuinely enriched 3 out of 4 times).

Sup Table 2 SET I - GO GROUPS

| Gene Ontology Term                                    | Count | %   | PValue     | Genes                                                                                                                                                                                                                                                                                                                     | Fold Enrichment | FDR   |
|-------------------------------------------------------|-------|-----|------------|---------------------------------------------------------------------------------------------------------------------------------------------------------------------------------------------------------------------------------------------------------------------------------------------------------------------------|-----------------|-------|
| GO:0012501:programmed cell death                      | 38    | 3.8 | 0.00634947 | DPP2, SIVA1, PACS2, TRAF2, UBE2Z, LRDD, ZMAT3, RTKN, EIF5A, TNFSF13, BCL2L1, TNFSF12, DAXX, SCRIB, MAP3K1, BAG2, FAS, TRAF4, GM8172, SGPL1, BCL10, LTBR, 4632434I1RIK, EDA2R, MTAP1S, PEA15A, RPS6, PPP1R13L, DNASE2A, PPM1F, SEMA6A, MEF2D, TRIM35, BAX, PSME3, APAF1, PDCD6IP, GADD45B, NEK6, TRIM39                    | 1.6             | 10.58 |
| GO:0019725:cellular homeostasis                       | 31    | 3.1 | 0.00275624 | GLRX3, GM98, FTL1, FTL2, ATOX1, GNA11, TXN1, NHLRC2, FKBP1A, GM10116, GCLM, PRDX1, ATP6V0C, ANXA7, MT2, TRPV4, MT1, NRG1, APEX1, SCO2, EIF2B4, EIF2B5, TXNL1, SMAD7, P2RX4, HIF1A, GNB1, BAX, NAB1, GM12669, STC1, ASNA1, CLN5, ADD1                                                                                      | 1.8             | 4.73  |
| GO:0010941:regulation of cell death                   | 42    | 4.2 | 0.0136148  | SIVA1, TRAF2, 1110007C09RIK, ZBTB16, BCL2L1, GCLM, PRDX1, SCRIB, SRC, ALDH1A1, SERINC3, RRN3, RPS3A, B230120H23RIK, AGT, PPP2CB, PCSK9, VNN1, FAS, ERCC1, TRAF4, IHH, ANGPTL4, GM8172, BMP4, BCL10, MSH6, KLF10, PEA15A, CSDA, RPS6, PRKCD, HRAS1, NRAS, TRIM35, EI24, HIF1A, BTG1, BAX, MNT, PSME3, APAF1, APBB3         | 1.5             | 21.39 |
| GO:0034101:erythrocyte homeostasis                    | 9     | 0.9 | 0.00396503 | BMP4, MAEA, RPS19, ID2, DYRK3, RPS6, PRDX1, DNASE2A, GM8172, ADD1                                                                                                                                                                                                                                                         | 3.5             | 6.74  |
| GO:0051170:nuclear import                             | 9     | 0.9 | 0.00874503 | GM10184, IPO7, IPO4, IPO5, GM10259, TPR, KPNB1, HNRNPA1, ARAP1, TOB1                                                                                                                                                                                                                                                      | 3.0             | 14.29 |
| GO:0051092:positive regulation of NF-kappaB transcrip | 6     | 0.6 | 0.00766795 | BCL10, MTDH, MYD88, TLR2, EDA2R, IKKB                                                                                                                                                                                                                                                                                     | 4.7             | 12.64 |
| GO:0030163:protein catabolic process                  | 44    | 4.4 | 0.00418342 | CAST, RAD23B, TRAF2, UBE2Z, SAE1, PSMA7, TRIM11, PSMB5, PSMB4, FBXW7, PSMB6, PSMB3, PPP2CB, FBXO6, PCSK9, RBCK1, RNF149, USP14, RPS27A, NFX1, TBL1XR1, SOCS3, RNF19A, DDB1, ENC1, UBE2I, PSMA1, UBE2O, CBLC, PSMC6, PSMC5, KDM2B, PSMC4, KDM2A, PSMC3, PSMC2, UBE2M, PSMC1, WSB2, USP47, USP22, RNF19B, UBB, USP43, HDAC6 | 1.6             | 7.10  |

**Sup Table 2 SET II & SET III - GO GROUPS**

| Gene Ontology Term                                | Count | %   | PValue   | Genes                                                                                                                                                                                                                                                                                                                                                                                                                                                                         | Fold Enrichment | FDR    |
|---------------------------------------------------|-------|-----|----------|-------------------------------------------------------------------------------------------------------------------------------------------------------------------------------------------------------------------------------------------------------------------------------------------------------------------------------------------------------------------------------------------------------------------------------------------------------------------------------|-----------------|--------|
| GO:0006754:ATP biosynthetic process               | 15    | 1.4 | 1.12E-04 | ATP5E, LDHD, ATP10D, ATP11C, GM10221, ATP5G1, ATP6V1B1, GM10231, ATP6V1A, ATP6V1C2, ATP9B, ATP6V1E1, GM12231, ATP5L, ATP5H, ATP8A1                                                                                                                                                                                                                                                                                                                                            | 3.4             | 0.198  |
| GO:0015986:ATP synthesis coupled proton transport | 10    | 0.9 | 1.17E-04 | ATP6V1C2, ATP5E, ATP6V1A, ATP6V1E1, GM12231, ATP5L, GM10221, ATP5G1, ATP6V1B1, ATP5H, GM10231                                                                                                                                                                                                                                                                                                                                                                                 | 5.0             | 0.205  |
| GO:0042157:lipoprotein metabolic process          | 13    | 1.2 | 7.14E-04 | ATG10, PIGQ, ALG9, RABGGTA, CWH43, PIGK, APOB, APOE, PIGG, ATG7, DPM1, PIGB, APOM                                                                                                                                                                                                                                                                                                                                                                                             | 3.2             | 1.248  |
| GO:0005996:monosaccharide metabolic process       | 23    | 2.1 | 6.35E-04 | GM2574, GM5138, FN3K, GM10566, PDHB, GALK2, NISCH, GM10293, PPP1R1A, GM10291, GM12286, GYS2, GM3839, MAN2B1, GAPDH, GM10358, GM3272, GPD1, GM3222, GMDS, GM5507, ALDH5A1, PDK3, EPM2A, GM13292, RBKS, PFKM, DLAT, CSGALNACT1, PGM2, GBE1, GM4609, GANC, GAA, GM10284, GM10327, PGK1-RS7, GM2606, SERP1                                                                                                                                                                        | 2.2             | 1.111  |
| GO:0008104:protein localization                   | 66    | 6.2 | 1.07E-04 | SEC31B, TLN1, OXA1L, CHMP6, SLC9A2, VPS53, CASK, NBEA, SYNGR1, PEX7, OS9, STXBP5L, KIF13A, APOB, APOE, SRPR, VPS13D, ATG7, TIMM9, DYNC2H1, VPS13B, DNAJC19, COX16, DLG1, SCAMP2, RPH3AL, STXBP4, VTI1A, BCAP31, COPG2, SEC61B, RPAIN, AGTR1A, TOMM20, SIL1, AKAP7, ERC1, SERP1, FRAS1, ARL6IP1, SNX9, STX8, ATG10, LMF1, LRBA, SEC62, CD74, SUFU, NXT2, SFT2D1, TRAM2, EXOC4, SNX27, SNX25, HSPG2, CELSR1, COG5, AKTIP, CADPS2, SCFD2, TOM1L2, MCFD2, FAF1, SNX31, LRP4, SSR3 | 1.6             | 0.188  |
| GO:0009063:cellular amino acid catabolic process  | 9     | 0.8 | 0.00795  | BCKDK, GM9826, BCKDHB, IDO2, DMGDH, PRODH2, GC5H, DTD1, AUH                                                                                                                                                                                                                                                                                                                                                                                                                   | 3.1             | 13.086 |
| GO:0006506:GPI anchor biosynthetic process        | 7     | 0.7 | 0.00471  | CWH43, PIGK, PIGG, PIGB, DPM1, PIGQ, ALG9                                                                                                                                                                                                                                                                                                                                                                                                                                     | 4.3             | 7.968  |
| GO:0050801:ion homeostasis                        | 28    | 2.6 | 0.00467  | MYO5A, SLC9A8, SLC9A6, ERBB2, HEXB, SLC9A2, NR3C2, CACNB4, ATP6V1B1, SYPL2, APLP2, CKB, AQP11, APOE, SLC39A5, DLG1, PRKCA, AIFM3, CCDC47, SOD1, TECR, KDR, ATXN1, BSND, TFRC, RHCG, GNAQ, COMMD1                                                                                                                                                                                                                                                                              | 1.8             | 7.896  |

Sup Table 2 SET V- GO GROUPS

| Gene Ontology Term                             | Count | %   | PValue     | Genes                                                                                                                                                                                                                                                                                                                                                                                                                                                                                                                             | Fold Enrichment | FDR   |
|------------------------------------------------|-------|-----|------------|-----------------------------------------------------------------------------------------------------------------------------------------------------------------------------------------------------------------------------------------------------------------------------------------------------------------------------------------------------------------------------------------------------------------------------------------------------------------------------------------------------------------------------------|-----------------|-------|
| GO:0006793:phosphorus metabolic process        | 72    | 6.7 | 2.45E-04   | CDK19, ATP5E, BCKDK, PDP2, LPAR3, CASK, CLK1, INSR, ADCK1, UQCR11, ATP5L, PRKACB, ATP5H, CHUK, MAP2K6, MAP2K5, PRKCA, TRPM6, BCR, PTPRF, TRPM7, PTPRG, MYO3B, WNK1, WNK2, PRKCE, STK3, MTMR12, MAST3, SPAG9, ATP6V1A, ATP6V1C2, CDKL1, MAPK4, MTMR10, ROR1, PPM1L, CSNK1G3, PRKD3, NRBP2, KALRN, FGR4, ERBB4, ERBB2, PRKDC, ATP5G1, ATP6V1B1, GM10231, CD74, GALK2, STK32B, DUSP15, EGF, CSF1R, FGD4, GPD1, PDK3, EPM2A, PTPRA, MET, TGFB2, GM10221, SOD1, KDR, DUSP1, ATP6V1E1, ULK2, RSR1, GM12231, CIT, PGK1-RS7, IGFBP3, MYLK | 1.5             | 0.431 |
| GO:0006754:ATP biosynthetic process            | 15    | 1.4 | 1.12E-04   | ATP5E, LDHD, ATP10D, ATP11C, GM10221, ATP5G1, ATP6V1B1, GM10231, ATP6V1A, ATP6V1C2, ATP9B, ATP6V1E1, GM12231, ATP5L, ATP5H, ATP8A1                                                                                                                                                                                                                                                                                                                                                                                                | 3.4             | 0.198 |
| GO:0015986:ATP synthesis coupled proton transp | 10    | 0.9 | 1.17E-04   | ATP6V1C2, ATP5E, ATP6V1A, ATP6V1E1, GM12231, ATP5L, GM10221, ATP5G1, ATP6V1B1, ATP5H, GM10231                                                                                                                                                                                                                                                                                                                                                                                                                                     | 5.0             | 0.205 |
| GO:0042158:lipoprotein biosynthetic process    | 12    | 1.1 | 1.41E-04   | CWH43, PIGK, APOB, ATG10, PIGG, APOE, ATG7, PIGB, DPM1, PIGQ, ALG9, RABGGTA                                                                                                                                                                                                                                                                                                                                                                                                                                                       | 4.0             | 0.248 |
| GO:000599:monosaccharide metabolic process     | 23    | 2.1 | 6.35E-04   | GM2574, GM5138, FN3K, GM10566, PDHB, GALK2, NISCH, GM10293, PPP1R1A, GM10291, GM12286, GYS2, GM3839, MAN2B1, GAPDH, GM10358, GM3272, GPD1, GM3222, GMDS, GM5507, ALDH5A1, PDK3, EPM2A, GM13292, RBKS, PFKM, DLAT, CSGALNACT1, PGM2, GBE1, GM4609, GANC, GAA, GM10284, GM10327, PGK1-RS7, GM2606, SERP1                                                                                                                                                                                                                            | 2.2             | 1.111 |
| GO:0008104-protein localization                | 66    | 6.2 | 1.07E-04   | SEC31B, TLN1, OXA1L, CHMP6, SLC9A2, VPS53, CASK, NBEA, SYNGR1, PEX7, OS9, STXBP5L, KIF13A, APOB, APOE, SRPR, VPS13D, ATG7, TIMM9, DYNC2H1, VPS13B, DNAJC19, COX16, DLG1, SCAMP2, RPH3AL, STXBP4, VTI1A, BCAP31, COG2, SEC61B, RPAIN, AGTR1A, TOMM20, SIL1, AKAP7, ERC1, SERP1, FRAS1, ARL6IP1, SNX9, STX8, ATG10, LMF1, LRBA, SEC62, CD74, SUFU, NXT2, SFT2D1, TRAM2, EXOC4, SNX27, SNX25, HSPG2, CELSR1, COG5, AKTIP, CADPS2, SCFD2, TOM1L2, MCFD2, FAF1, SNX31, LRP4, SSR3                                                      | 1.6             | 0.188 |
| GO:0016054-organic acid catabolic process      | 12    | 1.1 | 0.00401766 | BCKDK, ACOT7, GM9826, BCKDHB, IDO2, DMGDH, PRODH2, GCSH, AKR1D1, DTD1, PEX7, AUH                                                                                                                                                                                                                                                                                                                                                                                                                                                  | 2.7             | 6.834 |
| GO:0006633-fatty acid biosynthetic process     | 12    | 1.1 | 0.00401766 | MYO5A, SCD1, TBXAS1, ELOVL5, MLYCD, FADS1, PRKAG2, ACACA, FADS2, ELOVL6, FADS6, CD74                                                                                                                                                                                                                                                                                                                                                                                                                                              | 2.7             | 6.834 |
| GO:0006506:GPI anchor biosynthetic process     | 7     | 0.7 | 0.00471154 | CWH43, PIGK, PIGG, PIGB, DPM1, PIGQ, ALG9                                                                                                                                                                                                                                                                                                                                                                                                                                                                                         | 4.3             | 7.968 |
| GO:0050801:ion homeostasis                     | 28    | 2.6 | 0.00466698 | MYO5A, SLC9A8, SLC9A6, ERBB2, HEXB, SLC9A2, NR3C2, CACNB4, ATP6V1B1, SYPL2, APLP2, CKB, AQP11, APOE, SLC39A5, DLG1, PRKCA, AIFM3, CCDC47, SOD1, TECR, KDR, ATXN1, BSND, TFRC, RHCG, GNAQ, COMMD1                                                                                                                                                                                                                                                                                                                                  | 1.8             | 7.896 |

Sup Table 2 SET VI - GO GROUPS

| Term                                                    | Count | %   | PValue     | Genes                                                                                                                                                                                                                                                                                                                                             | Fold Enrichment | FDR       |
|---------------------------------------------------------|-------|-----|------------|---------------------------------------------------------------------------------------------------------------------------------------------------------------------------------------------------------------------------------------------------------------------------------------------------------------------------------------------------|-----------------|-----------|
| GO:0006099:tricarboxylic acid cycle                     | 15    | 2.1 | 9.67E-15   | DLST, ACO2, ACO1, SUCLG2, SUCLG1, SDHA, SDHB, IDH3G, SDHC, SDHD, IDH2, IDH1, 2610507B1RIK, SUCLA2, MDH1                                                                                                                                                                                                                                           | 16.7            | 1.670E-11 |
| GO:0005996:monosaccharide metabolic process             | 25    | 3.4 | 4.30E-07   | GM12033, LDHB, PPARA, PHKB, SLC37A4, ALDOB, OGDH, HIBADH, GALM, UGT1A9, UGT1A8, UGT1A7C, UGT1A6B, UGT1A2, UGT1A5, UGT1A6A, PDHA1, DHTKD1, GAPDH, GPD2, PDK2, GM3200, FBP1, CMAH, GM12537, FUCA1, UGT1A1, CPT1A, PCK1, UGT1A10, PCX, G6PC, MAPK14, PGK1, GM12070, XYLB, MDH1                                                                       | 3.3             | 7.410E-04 |
| GO:0009165:nucleotide biosynthetic process              | 22    | 3.0 | 4.33E-06   | ASPDH, NAMPT, ATP5J2, ATP1B1, ATP5B, ATP5F1, ATP11A, ATP1A1, KMO, ATP5G3, MTHFD1, DHFR, ATP2A2, ADK, ATP9A, ATP5C1, HAAO, ATP5O, ATP5A1, GUCA2B, ATP6V0A4, ATP5J                                                                                                                                                                                  | 3.2             | 7.468E-03 |
| GO:0046942:carboxylic acid transport                    | 17    | 2.3 | 1.32E-06   | SLC36A1, HNF1A, SLC25A4, SLC6A20A, HTT, SLC7A9, SLC7A13, SLC19A1, SLC6A19, SLC7A7, SLC25A13, SLC6A6, SLC22A4, SLC13A3, SLC22A5, SLC1A1, SLC27A2                                                                                                                                                                                                   | 4.4             | 2.285E-03 |
| GO:0006754:ATP biosynthetic process                     | 14    | 1.9 | 1.61E-05   | ATP5J2, ATP1B1, ATP5B, ATP5F1, ATP11A, ATP1A1, ATP5G3, ATP2A2, ATP9A, ATP5C1, ATP5O, ATP5A1, ATP6V0A4, ATP5J                                                                                                                                                                                                                                      | 4.4             | 2.778E-02 |
| GO:0019395:fatty acid oxidation                         | 8     | 1.1 | 2.59E-05   | ACOX2, ACOX1, ACADM, MAPK14, BDH2, HSD17B4, PHYH, ACOX3                                                                                                                                                                                                                                                                                           | 8.5             | 4.470E-02 |
| GO:0009074:aromatic amino acid family catabolic process | 6     | 0.8 | 3.40E-05   | HGD, GSTZ1, PAH, AFMID, HPD, FAH                                                                                                                                                                                                                                                                                                                  | 13.9            | 5.858E-02 |
| GO:0044275:cellular carbohydrate catabolic process      | 11    | 1.5 | 9.89E-05   | GM12033, LDHB, GM3200, ALDOB, GM12537, OGDH, HIBADH, G6PC, MIOX, PDHA1, PGK1, DHTKD1, GM12070, GAPDH, MDH1                                                                                                                                                                                                                                        | 4.7             | 1.704E-01 |
| GO:0015986:ATP synthesis coupled proton transport       | 8     | 1.1 | 4.96E-04   | ATP5B, ATP5F1, ATP5C1, ATP5O, ATP5A1, ATP6V0A4, ATP5G3, ATP5J                                                                                                                                                                                                                                                                                     | 5.5             | 8.523E-01 |
| GO:0006638:neutral lipid metabolic process              | 8     | 1.1 | 0.00167023 | LPL, MOGAT1, G6PC, DGAT2, SLC37A4, SLC22A4, CAT, PCK1                                                                                                                                                                                                                                                                                             | 4.5             | 2.842E+00 |
| GO:0051384:response to glucocorticoid stimulus          | 6     | 0.8 | 6.59E-04   | BCKDHA, UGT1A10, UGT1A9, UGT1A8, UGT1A7C, ACADS, UGT1A2, UGT1A6B, UGT1A6A, UGT1A5, SLC9A3, ALDOB, ASL, UGT1A1                                                                                                                                                                                                                                     | 8.1             | 1.131E+00 |
| GO:0006090:pyruvate metabolic process                   | 7     | 1.0 | 3.25E-04   | GPD2, PCX, G6PC, HTT, ALDOB, FBP1, PCK1                                                                                                                                                                                                                                                                                                           | 7.2             | 5.588E-01 |
| GO:0009743:response to carbohydrate stimulus            | 6     | 0.8 | 0.0029756  | GLUL, HNF1B, HNF1A, HNF4A, SLC37A4, ALDOB                                                                                                                                                                                                                                                                                                         | 5.9             | 5.010E+00 |
| GO:0019674:NAD metabolic process                        | 4     | 0.5 | 0.00774242 | ASPDH, NAMPT, KMO, MDH1                                                                                                                                                                                                                                                                                                                           | 9.3             | 1.255E+01 |
| GO:0006796:phosphate metabolic process                  | 48    | 6.6 | 0.01397914 | PRKCZ, PPP2R3A, UQCRC1, NDUFB8, ATP5B, PTPN22, PINK1, ATP5G3, IGF1R, UQCR10, APP, DCLK3, ATP5O, PRKAA2, PPP3CA, INSR, SIK3, NDUFS1, ATP5J, GPD2, PDK2, PTPRK, PTPRD, SGK2, ATP5F1, PI4KA, GM10222, PIM3, PPA2, GLYCK, CCND1, G6PC, MAP3K15, KSR2, SBF2, UQCRH, PPM1H, MAPK14, DLD, ATP5C1, MTOR, GYK, ATP5A1, PGK1, ATP6V0A4, LRRK2, MERTK, UQCRB | 1.4             | 2.156E+01 |
| GO:0046128:purine ribonucleoside metabolic process      | 5     | 0.7 | 0.01315425 | COASY, MAT2A, PANK1, ADK, TPMT                                                                                                                                                                                                                                                                                                                    | 5.3             | 2.042E+01 |

Sup Table 2 SET I - KEGG PATHWAYS

| Term                                             | Count | %   | PValue      | Genes                                                                                                                                                                                                                                                                                                                                                                                                                                                                                                            | Fold Enrichment | FDR         |
|--------------------------------------------------|-------|-----|-------------|------------------------------------------------------------------------------------------------------------------------------------------------------------------------------------------------------------------------------------------------------------------------------------------------------------------------------------------------------------------------------------------------------------------------------------------------------------------------------------------------------------------|-----------------|-------------|
| mmu03010:Ribosome                                | 49    | 4.9 | 4.94E-36    | RPL18, RPL36A, RPL19, RPL14, GM5786, GM14165, RPL15, GM6311, RPS27L, GM15710, RPS2, SNORA65, RPS3, RPS3A, RPLP0, RPLP1, GM10259, RPL11, GM12922, GM11687, RPS27A, GM10184, GM8730, RPS4X, GM6139, GM8841, RPS19, RPL41, RPS17, RPS14, RPS15, RPS12, RPS13, RPS11, UBB, GM10071, RPL27A, RPL35, RPS15A, RPL39, GM8225, RPS26, RPS28, GM12366, RPL7, GM6576, RPL6, RPL9, RPL8, RPL10A, RPS20, RPL4, RPS24, GM8172, RPSA, RPL24, RPL23A, RPS6, RPS8, RPS7, GM5921, RPL23, RPL13A, GM12918, GM10020, GM4294, GM12091 | 9.1             | 6.00E-33    |
| mmu03050:Proteasome                              | 16    | 1.6 | 4.80E-08    | PSMA7, PSMB5, PSMA1, PSMB4, PSMC6, PSMC5, PSMD13, PSMB6, PSMC4, PSMC3, PSMB3, PSMC2, PSMC1, PSME3, PSMD7, PSMD8                                                                                                                                                                                                                                                                                                                                                                                                  | 5.6             | 5.83E-05    |
| mmu04530:Tight junction                          | 21    | 2.1 | 1.47E-04    | PPP2R1A, OCLN, GNAI2, CLDN6, MYL12B, CSDA, PRKCD, LLGL1, SRC, HRAS1, LLGL2, BC021767, CDC42, NRAS, IGSF5, CTTN, B230120H23RIK, PPP2CB, CLDN1, RRAS, TJP2                                                                                                                                                                                                                                                                                                                                                         | 2.6             | 0.178088404 |
| mmu01040:Biosynthesis of unsaturated fatty acids | 6     | 0.6 | 0.020828315 | ACOT9, ACOT2, ACOT1, ACAA1B, ACOT5, HADHA                                                                                                                                                                                                                                                                                                                                                                                                                                                                        | 3.7             | 22.56668211 |
| mmu04912:GnRH signaling pathway                  | 12    | 1.2 | 0.030788927 | CDC42, NRAS, ATF4, PTK2B, MAP3K1, PLA2G12A, GNA11, PRKCD, SRC, PRKX, CALM1, HRAS1                                                                                                                                                                                                                                                                                                                                                                                                                                | 2.0             | 31.61315139 |
| mmu04115:p53 signaling pathway                   | 9     | 0.9 | 0.05431061  | EI24, ZMAT3, BAX, LRDD, FAS, APAF1, CCNG1, GADD45B, SESN3                                                                                                                                                                                                                                                                                                                                                                                                                                                        | 2.2             | 49.26290426 |
| mmu00030:Pentose phosphate pathway               | 5     | 0.5 | 0.067958894 | ALDOA, PGLS, H6PD, FBP2, PRPS1                                                                                                                                                                                                                                                                                                                                                                                                                                                                                   | 3.2             | 57.47813781 |
| mmu04722:Neurotrophin signaling pathway          | 13    | 1.3 | 0.091529239 | CDC42, NRAS, ATF4, MAP3K1, BAX, YWHAQ, SHC1, MAPKAPK2, IKBKB, PRKCD, ARHGDI2, CALM1, HRAS1                                                                                                                                                                                                                                                                                                                                                                                                                       | 1.7             | 68.85088912 |

**Sup Table 2 SET II and SET III - KEGG PATHWAYS**

| Term                                         | Count | %   | PValue      | Genes                                                                                                                                                      | Fold Enrichment | FDR    |
|----------------------------------------------|-------|-----|-------------|------------------------------------------------------------------------------------------------------------------------------------------------------------|-----------------|--------|
| mmu04010:MAPK signaling pathway              | 21    | 6.1 | 3.77E-06    | TRP53, PDGFB, PDGFA, RELA, MAP2K3, RELB, HSPA1A, HSPA1B, NFKB2, DDIT3, DUSP5, DUSP4, TNFRSF1A, JUN, JUND, HSPB1, MAP3K14, DUSP8, MYC, GADD45A, CD14, DUSP6 | 3.3             | 0.004  |
| mmu04115:p53 signaling pathway               | 10    | 2.9 | 3.26E-05    | TRP53, CDKN1A, BBC3, MDM2, PMAIP1, SFN, PERP, SESN2, GADD45A, GTSE1                                                                                        | 6.0             | 0.037  |
| mmu05215:Prostate cancer                     | 9     | 2.6 | 0.001284216 | TRP53, CDKN1A, HSP90AA1, PDGFB, PDGFA, RELA, MDM2, NFKBIA, CTNNB1                                                                                          | 4.2             | 1.460  |
| mmu00480:Glutathione metabolism              | 7     | 2.0 | 0.001370367 | GSTA1, GSTA2, GSR, GCLC, PGD, G6PDX, MGST1                                                                                                                 | 5.6             | 1.557  |
| mmu05416:Viral myocarditis                   | 9     | 2.6 | 0.001702617 | ACTB, H2-K1, ACTG1, EIF4G1, ICAM1, GM12715, GM8399, H2-D1, MYH9, CXADR, ABL2                                                                               | 4.0             | 1.931  |
| mmu04612:Antigen processing and presentation | 8     | 2.3 | 0.005791643 | H2-K1, CTSL, HSP90AA1, H2-D1, IFI30, HSPA1A, CTSB, HSPA1B, TAPBP                                                                                           | 3.7             | 6.431  |
| mmu04110:Cell cycle                          | 9     | 2.6 | 0.011122701 | TRP53, CDKN1A, YWHAG, YWHAH, PCNA, MDM2, SFN, GADD45A, MYC                                                                                                 | 2.9             | 12.015 |
| mmu04540:Gap junction                        | 7     | 2.0 | 0.016377149 | PDGFB, GM5620, PDGFA, TUBB2A, TUBB6, TUBA1A, TUBA1B, GM14150, TUBA1C                                                                                       | 3.4             | 17.220 |

**SET V - KEGG PATHWAYS**

| Term                                      | Count | %   | PValue     | Genes                                                                                                                                                                                                                                                                                                                                        | Fold Enrichment | FDR    |
|-------------------------------------------|-------|-----|------------|----------------------------------------------------------------------------------------------------------------------------------------------------------------------------------------------------------------------------------------------------------------------------------------------------------------------------------------------|-----------------|--------|
| mmu05010:Alzheimer's disease              | 25    | 2.3 | 5.61E-05   | ATP5E, GM2574, APH1A, APH1C, GM5138, MME, ATP5G1, GM10566, GM10231, NDUFB2, NDUFS7, UQCR11, GM10293, APOE, GM15429, GM10291, GM12286, NDUFS8, COX6B1, GM3839, PLCB1, GAPDH, GM10358, ATP5H, GM3272, NDUFA2, GM3222, GM5507, GM13292, GM10108, NDUFA1, ITPR2, ATF6, GM4609, GNAQ, NDUFV2, GM12231, GM10284, GM10327, GM2606, CACNA1D, GM13464 | 2.5             | 0.068  |
| mmu00500:Starch and sucrose metabolism    | 9     | 0.8 | 6.29E-04   | PGM2, GBE1, GANC, ENPP1, ENPP3, GAA, GYS2, UGT2A3, TREH                                                                                                                                                                                                                                                                                      | 4.5             | 0.764  |
| mmu00190:Oxidative phosphorylation        | 18    | 1.7 | 7.57E-04   | ATP5E, NDUFA2, ATP5G1, GM10221, ATP6V1B1, NDUFA1, GM10231, NDUFB2, NDUFS7, ATP6V1A, ATP6V1C2, UQCR11, ATP6V1E1, NDUFS8, NDUFV2, GM12231, COX6B1, ATP5L, ATP5H                                                                                                                                                                                | 2.5             | 0.918  |
| mmu00620:Pyruvate metabolism              | 8     | 0.7 | 0.00661675 | ME3, LDHD, ACYP2, ALDH2, ACACA, DLAT, PDHB, ALDH3A2                                                                                                                                                                                                                                                                                          | 3.5             | 7.772  |
| mmu00150:Androgen and estrogen metabolism | 7     | 0.7 | 0.00858569 | HSD3B6, HSD17B12, HSD3B5, HSD11B2, SRD5A1, UGT2A3, AKR1D1                                                                                                                                                                                                                                                                                    | 3.8             | 9.976  |
| mmu05012:Parkinson's disease              | 15    | 1.4 | 0.01490987 | ATP5E, NDUFA2, GM10108, ATP5G1, NDUFA1, GM10231, NDUFB2, NDUFS7, UQCR11, NDUFV2, NDUFS8, COX6B1, GM12231, SLC18A1, ATP5H                                                                                                                                                                                                                     | 2.0             | 16.730 |
| mmu00640:Propanoate metabolism            | 6     | 0.6 | 0.02300693 | MLYCD, ALDH2, ACACA, PCCB, PCCA, ALDH3A2                                                                                                                                                                                                                                                                                                     | 3.6             | 24.699 |



**SET VI - KEGG PATHWAYS**

| Term                                                 | Count | %   | PValue      | Genes                                                                                                                                                                                                                                                                                                | Fold Enrichment | FDR      |
|------------------------------------------------------|-------|-----|-------------|------------------------------------------------------------------------------------------------------------------------------------------------------------------------------------------------------------------------------------------------------------------------------------------------------|-----------------|----------|
| mmu00190:Oxidative phosphorylation                   | 39    | 5.3 | 5.61E-18    | UQCRC2, NDUFB5, UQCRC1, NDUFB8, NDUFB9, ATP5B, CYC1, COX7B, COX7C, UQCRFS1, COX5B, ATP5G3, UQCR10, NDUFS4, ATP5O, NDUFS2, NDUFS1, ATP5J, NDUFA4, ATP5J2, COX7A2, NDUFA9, NDUFA6, COX8A, ATP5F1, NDUFA10, PPA2, COX6C, NDUFV3, SDHA, SDHB, UQCRH, NDUFV1, SDHC, SDHD, ATP5C1, ATP5A1, ATP6V0A4, UQCRB | 5.2             | 6.79E-15 |
| mmu00280:Valine, leucine and isoleucine degradation  | 23    | 3.2 | 4.83E-16    | BCAT1, BCKDHA, ACAA2, ALDH6A1, ACADSB, BCAT2, ACADM, ACADS, HMGCS1, ECHS1, ACAT1, HIBADH, DBT, MCCC2, MUT, ALDH7A1, IVD, MCCC1, OXCT1, DLD, ABAT, HADH, ALDH9A1                                                                                                                                      | 8.7             | 5.33E-13 |
| mmu00020:Citrate cycle (TCA cycle)                   | 19    | 2.6 | 2.82E-15    | DLST, ACO2, ACO1, SUCLG2, SUCLG1, OGDH, PCK1, SDHA, SDHB, PCX, IDH3G, SDHC, SDHD, DLD, IDH2, IDH1, PDHA1, SUCLA2, MDH1                                                                                                                                                                               | 10.7            | 3.36E-12 |
| mmu00650:Butanoate metabolism                        | 17    | 2.3 | 3.90E-11    | ACADS, HMGCS1, ECHS1, ACAT1, ACSM3, ACSM2, ALDH7A1, ACSM1, L2HGDH, OXCT1, ABAT, BDH2, PDHA1, HADH, BDH1, ACSM5, ALDH9A1                                                                                                                                                                              | 8.0             | 4.72E-08 |
| mmu00071:Fatty acid metabolism                       | 17    | 2.3 | 1.29E-09    | GCDH, ACOX1, ACAA2, ACADSB, ACADM, ACADS, ECHS1, ACAT1, CPT1A, ACOX3, CYP4A12B, ALDH7A1, ACSL1, CYP4A12A, ADH1, HADH, ALDH9A1                                                                                                                                                                        | 6.6             | 1.55E-06 |
| mmu00640:Propanoate metabolism                       | 14    | 1.9 | 2.72E-09    | ALDH6A1, LDHB, ACADM, SUCLG2, SUCLG1, ECHS1, ACSS2, ACAT1, MUT, ALDH7A1, ACSS1, ABAT, SUCLA2, ALDH9A1                                                                                                                                                                                                | 8.1             | 3.30E-06 |
| mmu00380:Tryptophan metabolism                       | 15    | 2.1 | 1.81E-08    | AADAT, GCDH, DDC, ACMSD, ECHS1, KMO, OGDH, ACAT1, INMT, AFMID, ALDH7A1, HAAO, CAT, HADH, ALDH9A1                                                                                                                                                                                                     | 6.5             | 2.19E-05 |
| mmu00620:Pyruvate metabolism                         | 14    | 1.9 | 2.26E-07    | ME1, LDHB, GRHPR, ACSS2, ACAT1, PCK1, PCX, ALDH7A1, ACSS1, DLD, ACOT12, PDHA1, ALDH9A1, MDH1                                                                                                                                                                                                         | 6.0             | 2.73E-04 |
| mmu04260:Cardiac muscle contraction                  | 17    | 2.3 | 6.03E-06    | UQCRC2, FXDY2, ATP1B1, UQCRC1, COX7A2, COX8A, COX7B, CYC1, COX7C, ATP1A1, UQCRFS1, COX5B, COX6C, UQCR10, ATP2A2, UQCRH, UQCRB                                                                                                                                                                        | 3.8             | 7.30E-03 |
| mmu03320:PPAR signaling pathway                      | 17    | 2.3 | 7.18E-06    | ACOX2, ME1, PPARA, LPL, ACOX1, ACADM, DBI, CPT1A, ACOX3, PCK1, CYP4A12B, ACSL1, CYP4A12A, CD36, GYK, SCP2, SLC27A2                                                                                                                                                                                   | 3.8             | 8.69E-03 |
| mmu00630:Glyoxylate and dicarboxylate metabolism     | 8     | 1.1 | 1.37E-05    | GLYCTK, MTHFD1, ACO2, ACO1, HAO2, GRHPR, AFMID, MDH1                                                                                                                                                                                                                                                 | 8.7             | 0.017    |
| mmu00010:Glycolysis / Gluconeogenesis                | 15    | 2.1 | 2.22E-05    | GM12033, LDHB, GM3200, ALDOB, FBP1, GM12537, ACSS2, PCK1, GALM, ALDH7A1, ACSS1, G6PC, ADH1, DLD, PDHA1, GM12070, PGK1, GAPDH, ALDH9A1                                                                                                                                                                | 3.8             | 0.027    |
| mmu00260:Glycine, serine and threonine metabolism    | 10    | 1.4 | 5.07E-05    | GLYCTK, CHDH, CTH, GATM, DLD, DAO, AGXT2, SARDH, PIPOX, CBS                                                                                                                                                                                                                                          | 5.5             | 0.061    |
| mmu00310:Lysine degradation                          | 11    | 1.5 | 7.42E-05    | AADAT, GCDH, DLST, ALDH7A1, ECHS1, AASS, OGDH, HADH, ACAT1, PIPOX, ALDH9A1                                                                                                                                                                                                                           | 4.7             | 0.090    |
| mmu00450:Selenoamino acid metabolism                 | 8     | 1.1 | 2.07E-04    | CTH, AHCY, MAT2A, GGT1, AHCYL1, AHCYL2, PAPSS2, CBS                                                                                                                                                                                                                                                  | 6.1             | 0.250    |
| mmu00330:Arginine and proline metabolism             | 11    | 1.5 | 6.99E-04    | LAP3, GLUL, ALDH7A1, ACY1, ASS1, GATM, ALDH4A1, DAO, ASL, ALDH9A1, PRODH                                                                                                                                                                                                                             | 3.6             | 0.842    |
| mmu00410:beta-Alanine metabolism                     | 7     | 1.0 | 0.001138311 | ALDH7A1, ACADM, CNDP1, UPB1, ECHS1, ABAT, ALDH9A1                                                                                                                                                                                                                                                    | 5.5             | 1.369    |
| mmu00250:Alanine, aspartate and glutamate metabolism | 8     | 1.1 | 0.001214118 | GLUL, ASPA, ASS1, ACY3, ABAT, ALDH4A1, AGXT2, ASL                                                                                                                                                                                                                                                    | 4.7             | 1.459    |
| mmu00072:Synthesis and degradation of ketone bodies  | 5     | 0.7 | 0.001671822 | OXCT1, HMGCS1, BDH2, BDH1, ACAT1                                                                                                                                                                                                                                                                     | 8.7             | 2.004    |
| mmu00340:Histidine metabolism                        | 7     | 1.0 | 0.002336039 | DDC, ALDH7A1, ASPA, CNDP1, ACY3, UROC1, ALDH9A1                                                                                                                                                                                                                                                      | 4.9             | 2.790    |
| mmu00770:Pantothenate and CoA biosynthesis           | 5     | 0.7 | 0.008654137 | BCAT1, COASY, BCAT2, PANK1, UPB1                                                                                                                                                                                                                                                                     | 5.8             | 9.983    |
| mmu00053:Ascorbate and aldarate metabolism           | 5     | 0.7 | 0.008654137 | UGT1A10, UGT1A9, ALDH7A1, UGT1A8, UGT1A7C, UGT1A2, UGT1A6B, UGT1A6A, UGT1A5, MIOX, UGT2B5, UGT1A1, ALDH9A1                                                                                                                                                                                           | 5.8             | 9.983    |
| mmu00120:Primary bile acid biosynthesis              | 5     | 0.7 | 0.008654137 | ACOX2, CYP7B1, AMACR, HSD17B4, SCP2                                                                                                                                                                                                                                                                  | 5.8             | 9.983    |
| mmu00480:Glutathione metabolism                      | 9     | 1.2 | 0.008667034 | LAP3, GSS, GPX3, IDH2, GSTZ1, IDH1, GGT1, ANPEP, GSTT2                                                                                                                                                                                                                                               | 3.0             | 9.997    |
| mmu00270:Cysteine and methionine metabolism          | 7     | 1.0 | 0.009936421 | LDHB, CTH, AHCY, MAT2A, AHCYL1, AHCYL2, CBS                                                                                                                                                                                                                                                          | 3.7             | 11.382   |
